# Supplementary material for: Genetic Factors for Coronary Heart Disease and Their Mechanisms: A Meta-Analysis and Comprehensive Review of Common Variants from Genome-Wide Association Studies
Source: MDPI journal article supplement (doi:10.3390/diagnostics12102561), 2022-10-21
Supplement: s1 [file s1]

a) Before correction

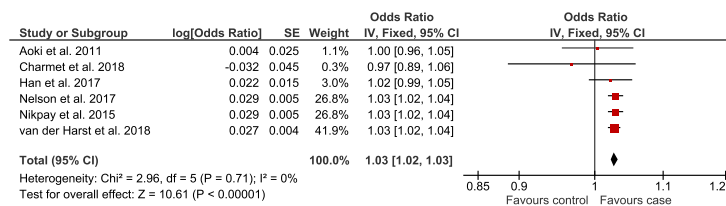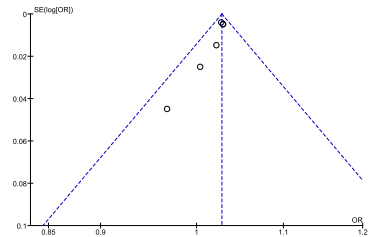

b) After correction

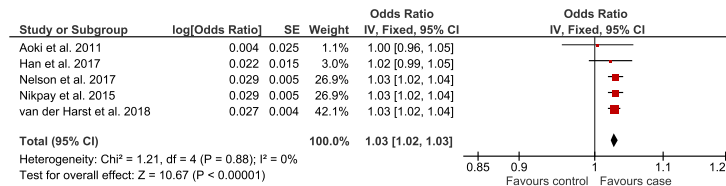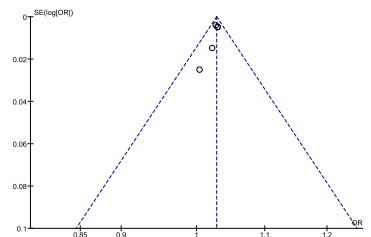

**Figure S2.** Forest and funnel plots for rs4593108 before and after correction for publication bias.
