# Supplementary material for: Genetic Factors for Coronary Heart Disease and Their Mechanisms: A Meta-Analysis and Comprehensive Review of Common Variants from Genome-Wide Association Studies
Source: MDPI journal article supplement (doi:10.3390/diagnostics12102561), 2022-10-21
Supplement: s1 [file s1]

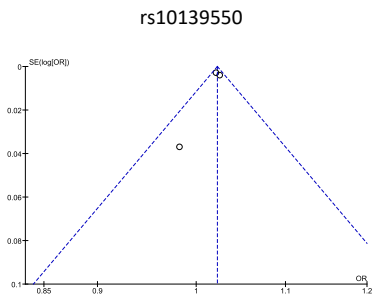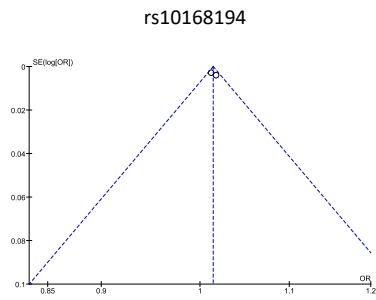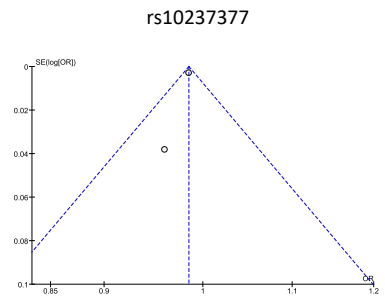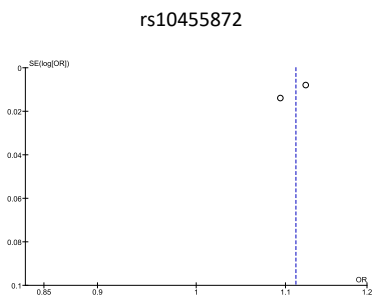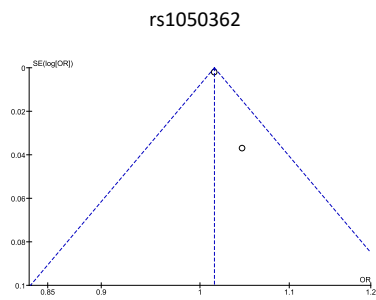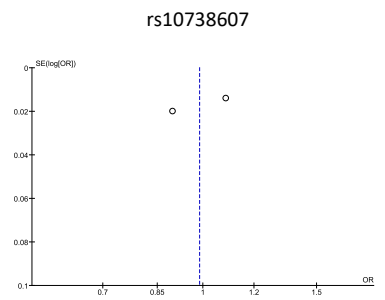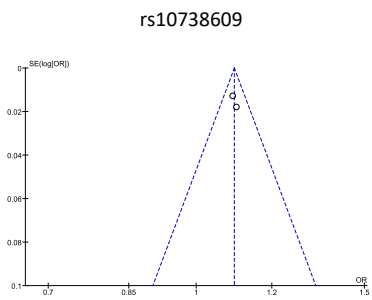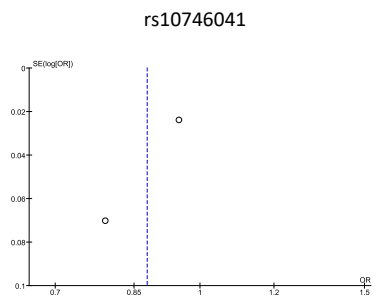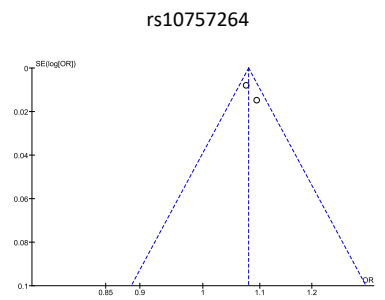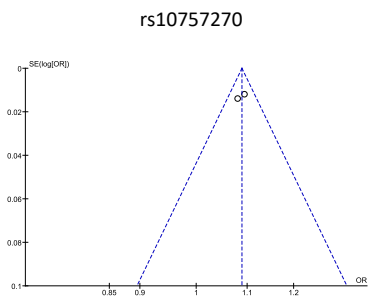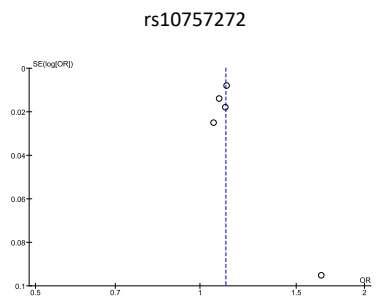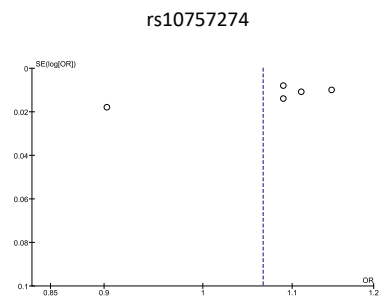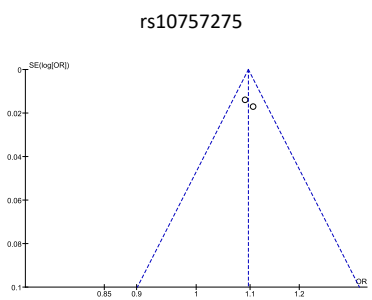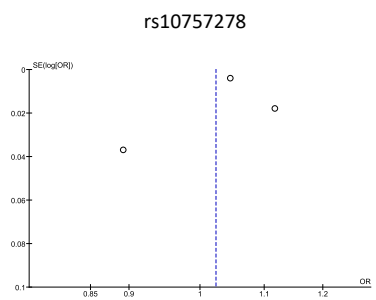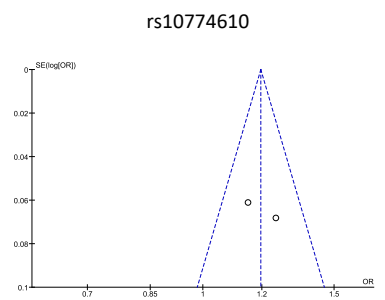

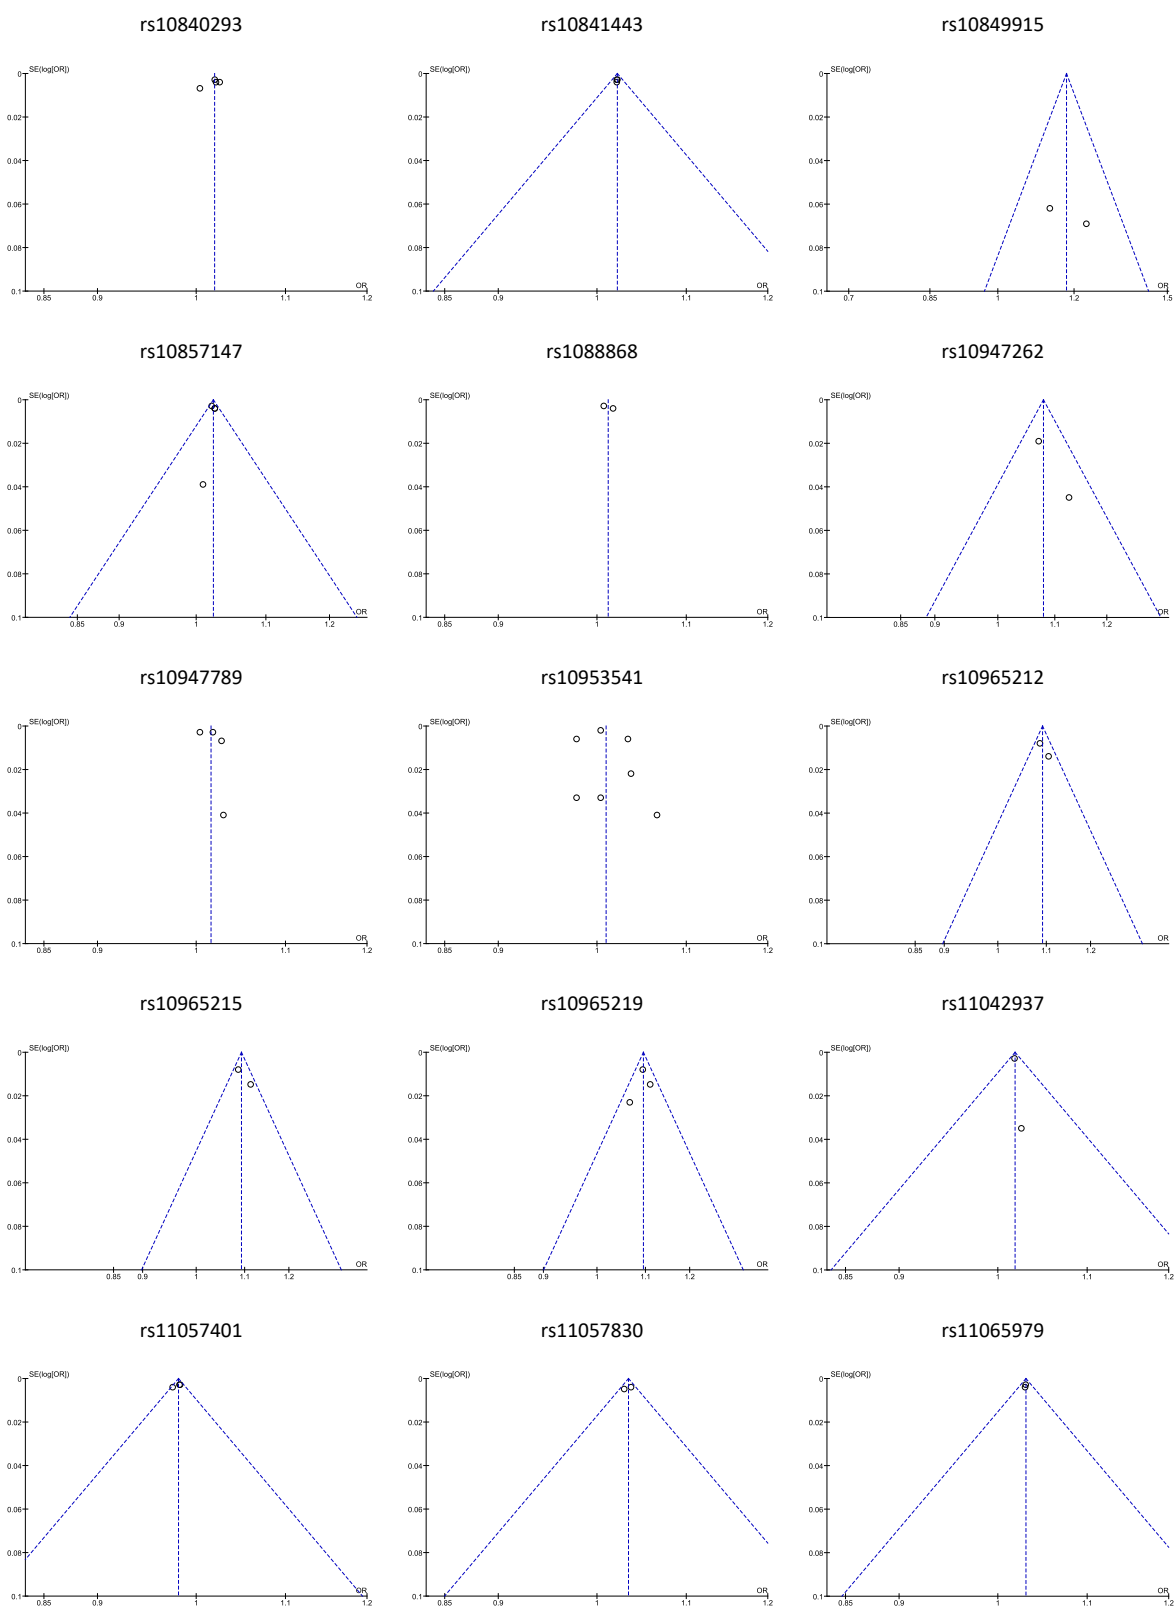

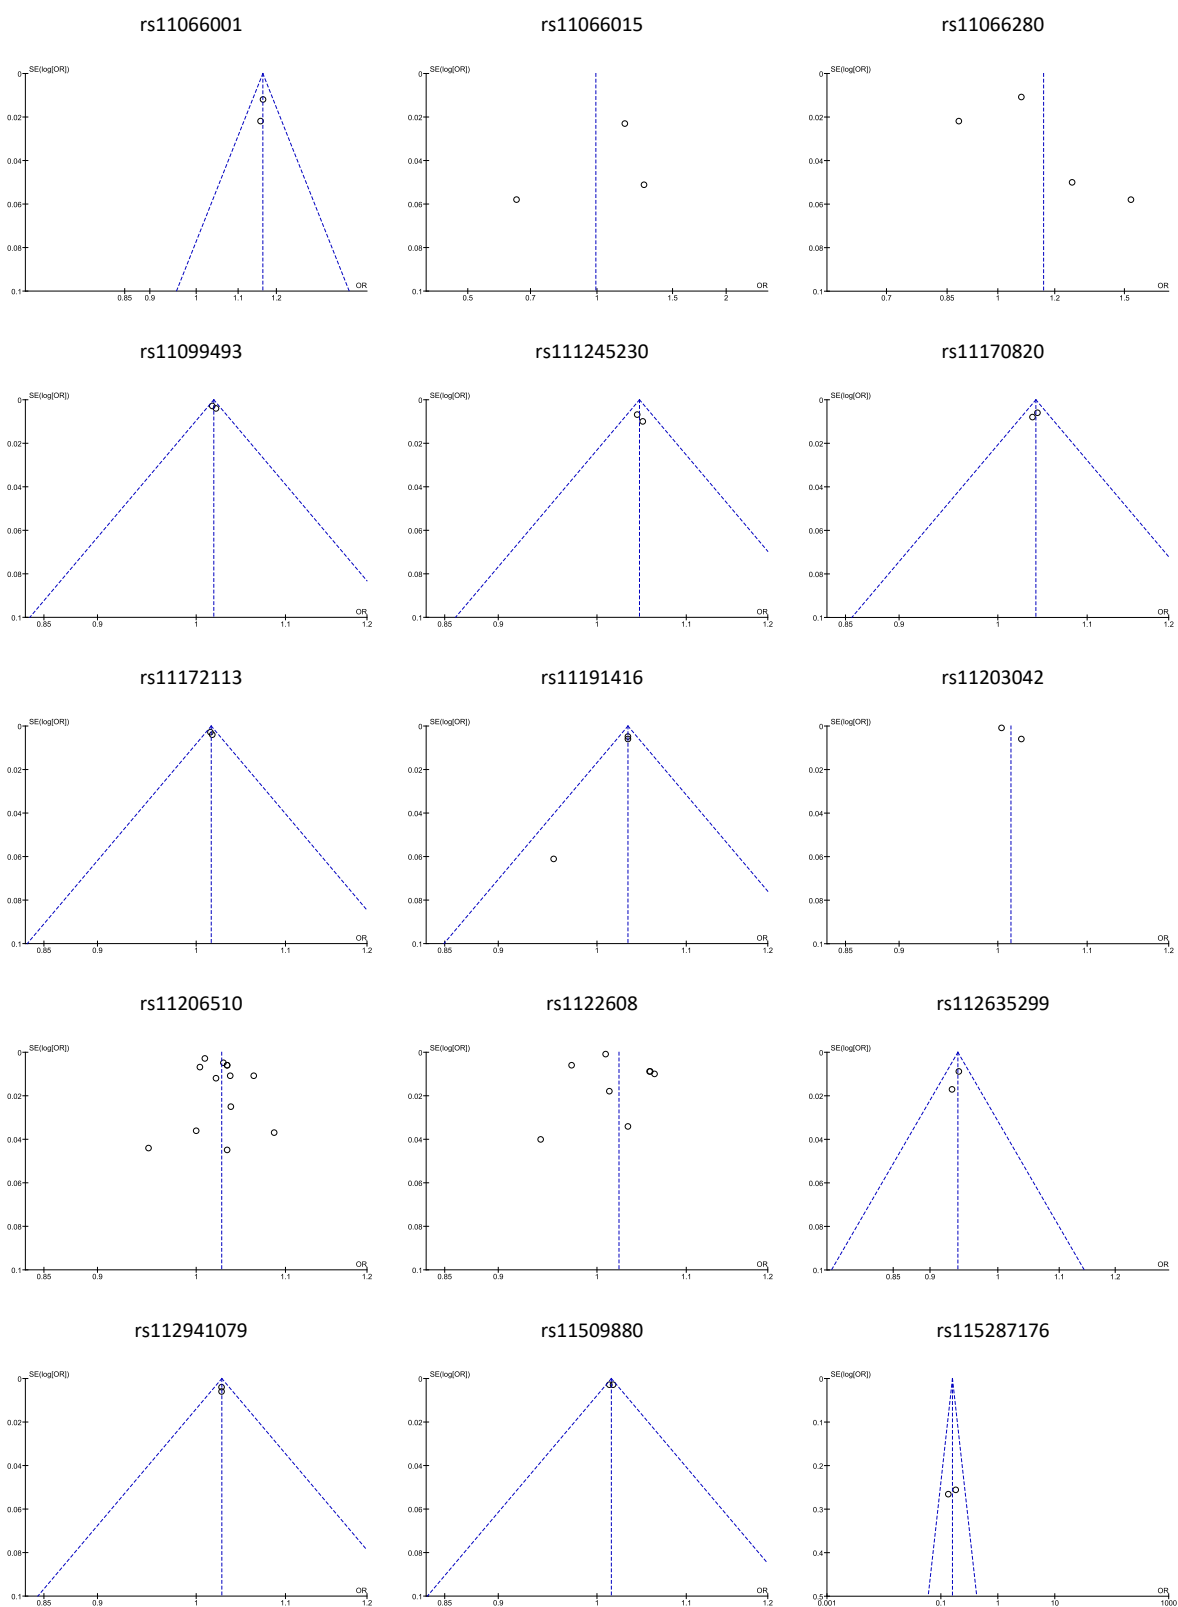

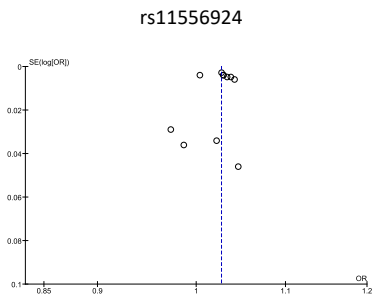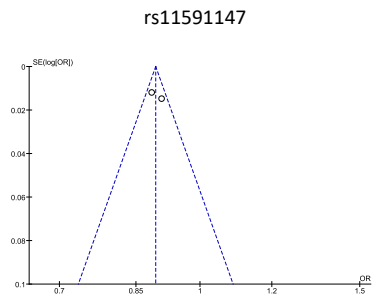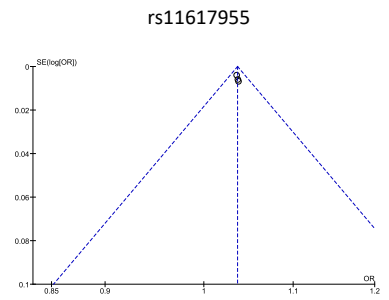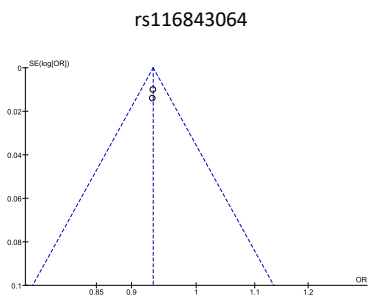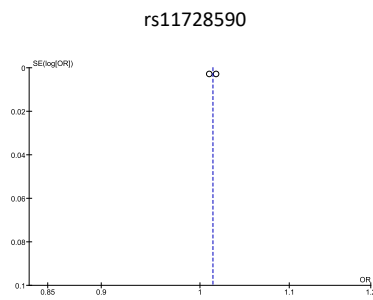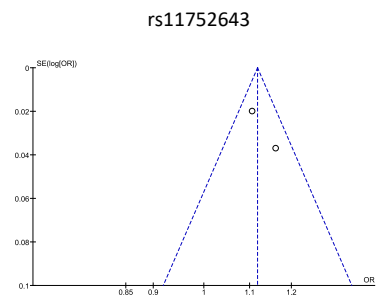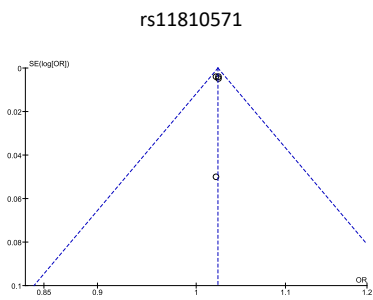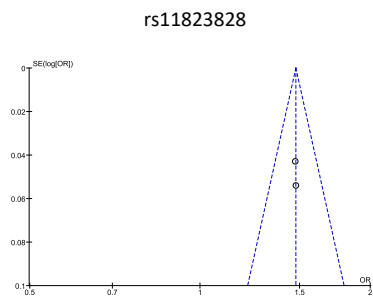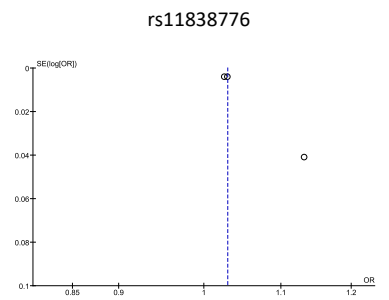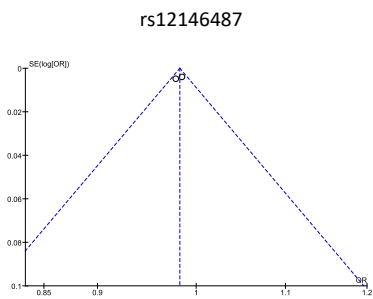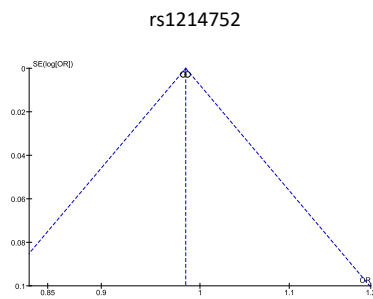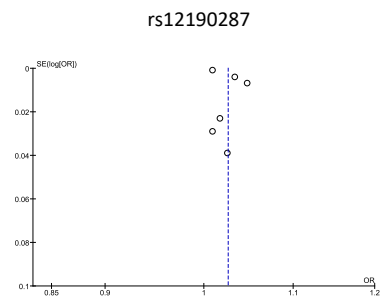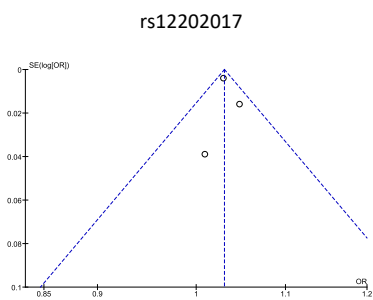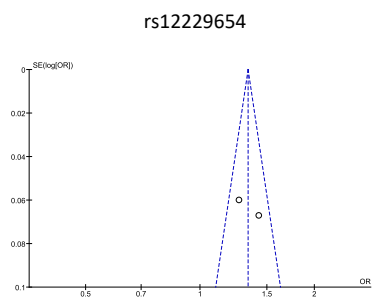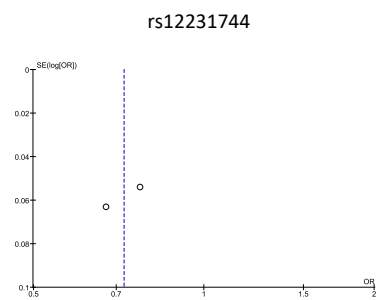

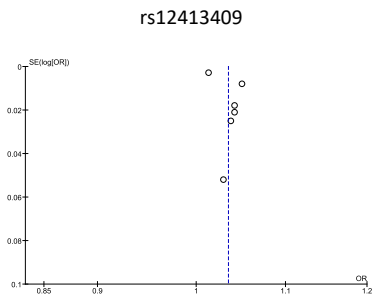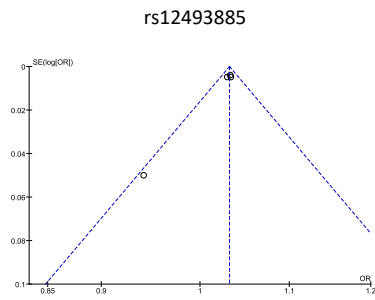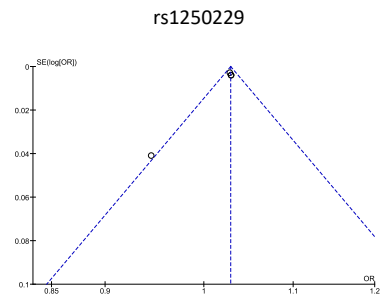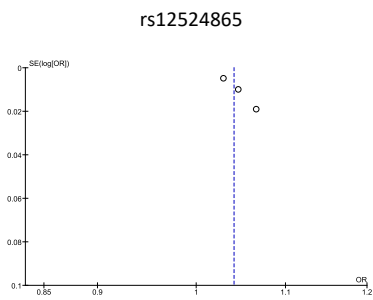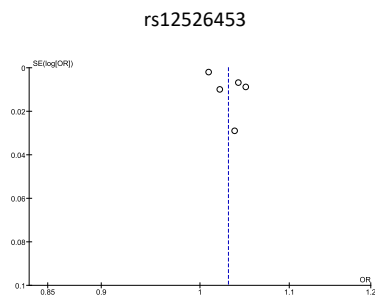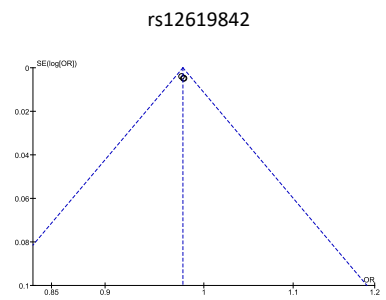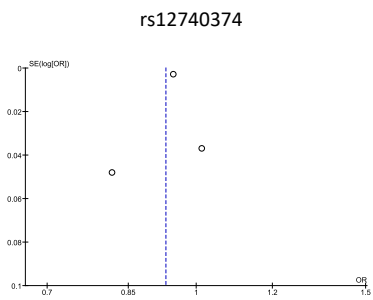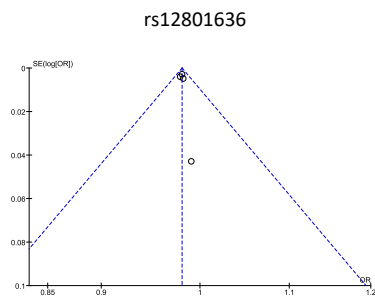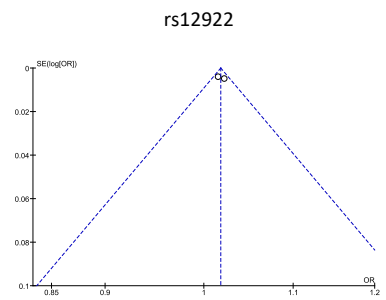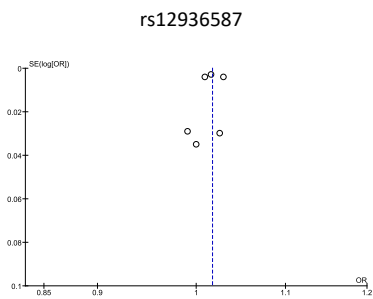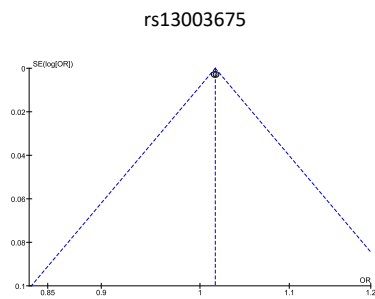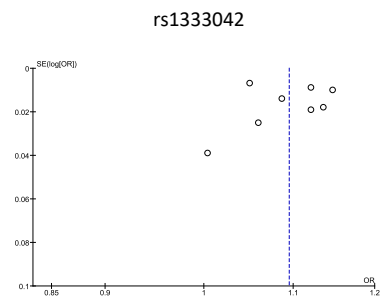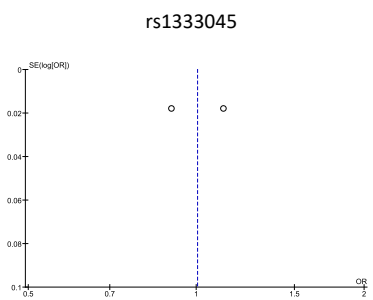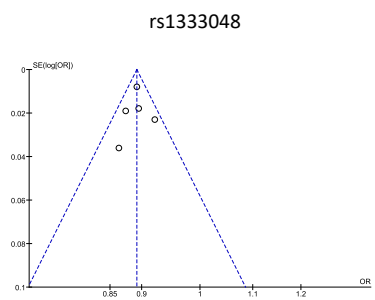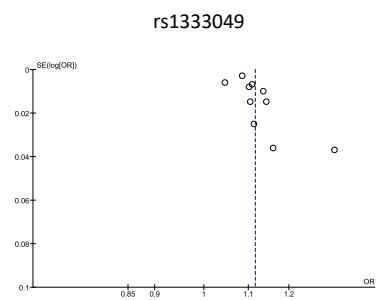

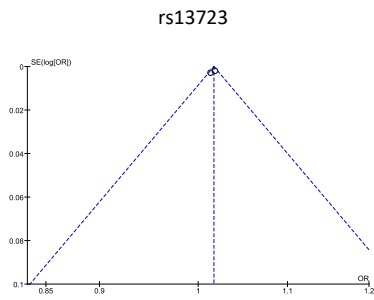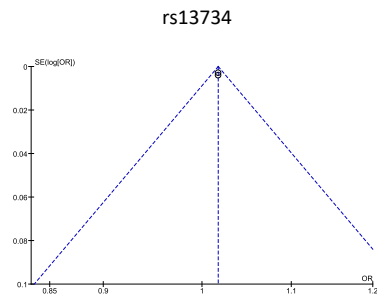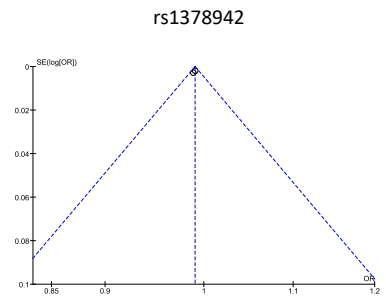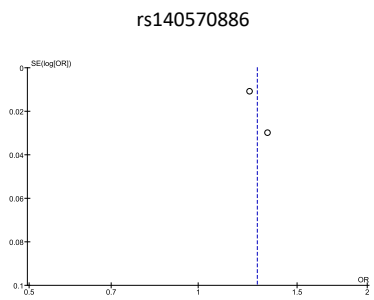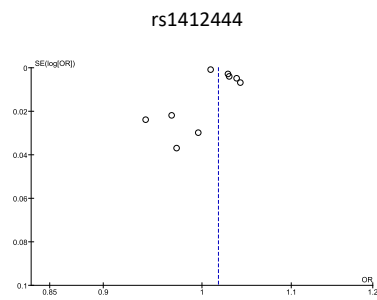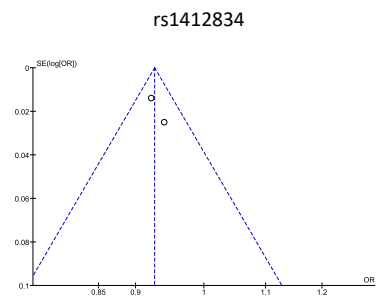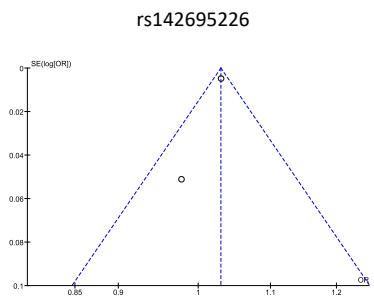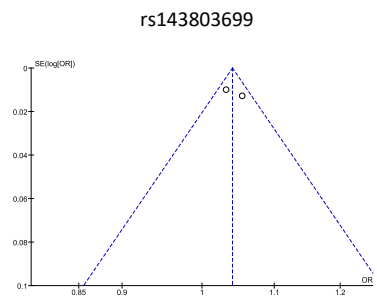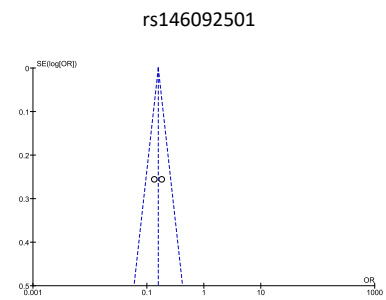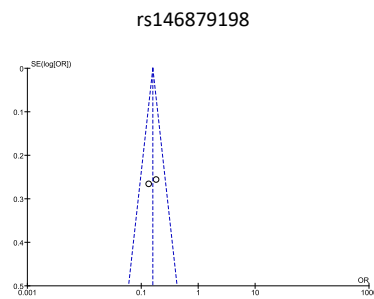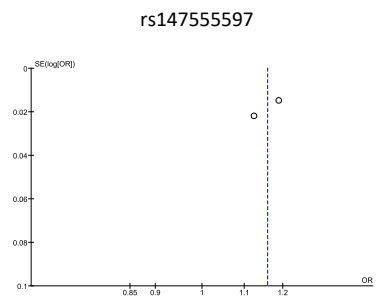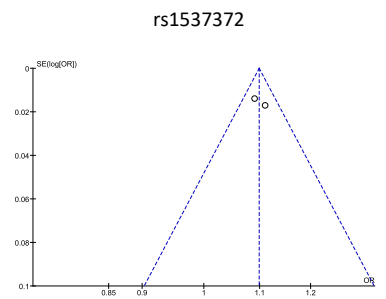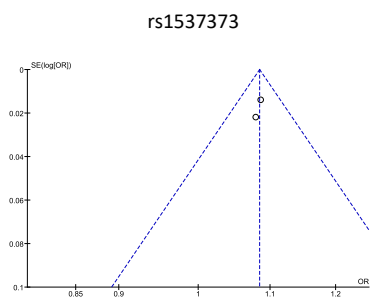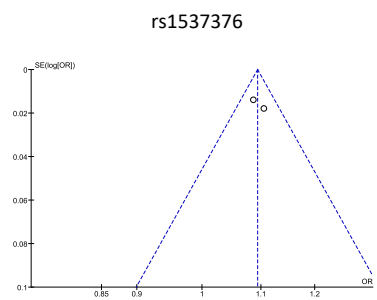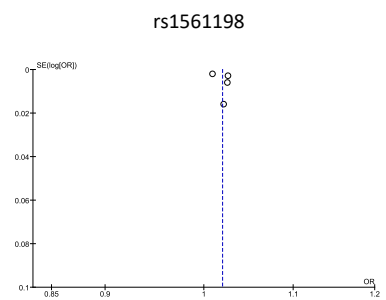

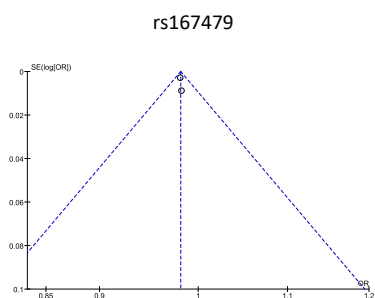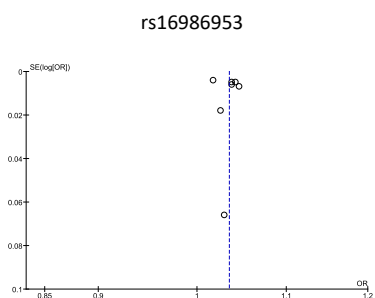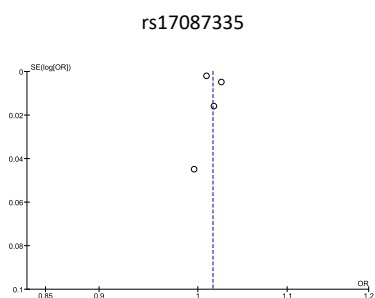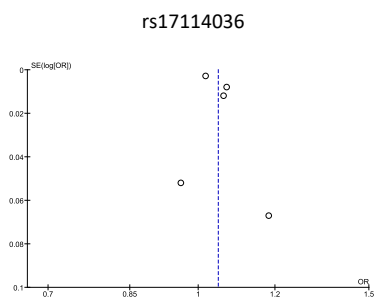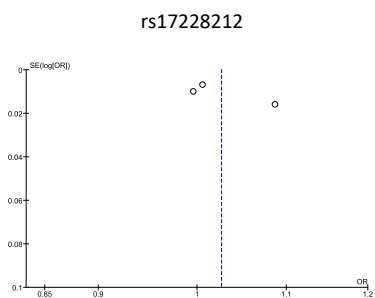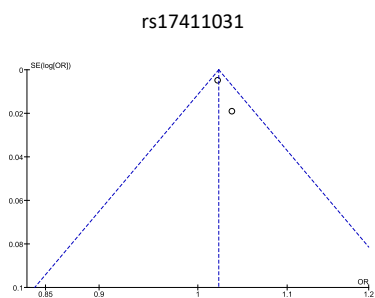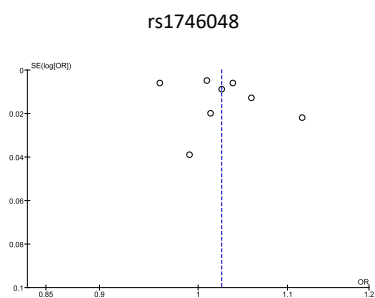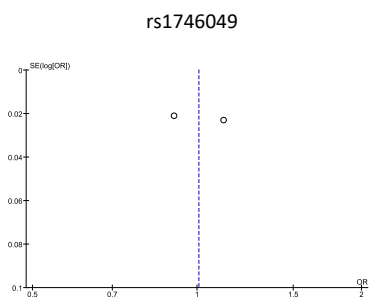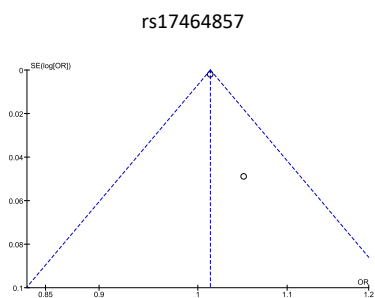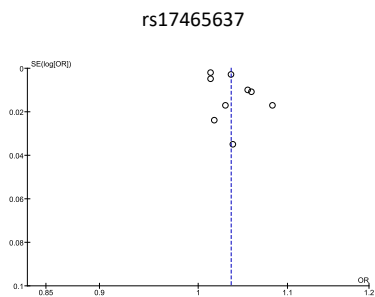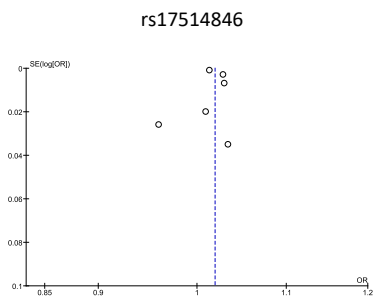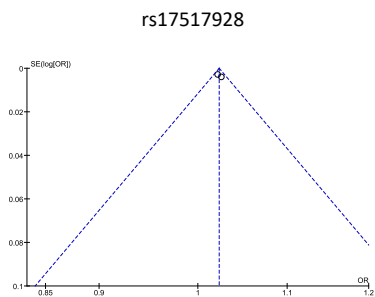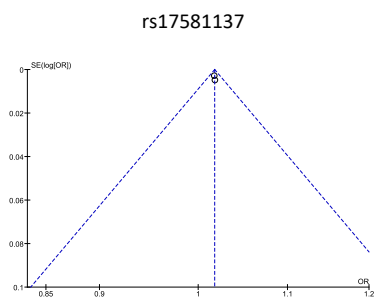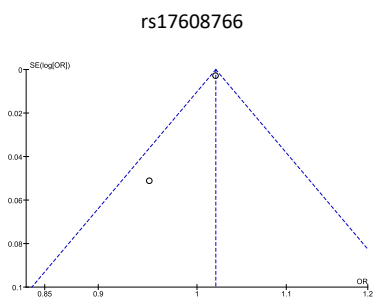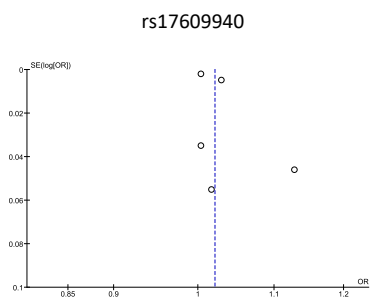

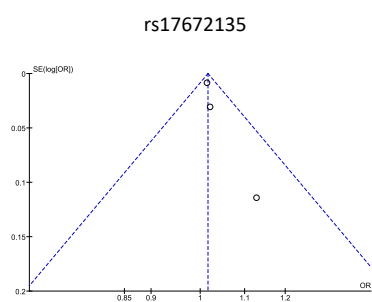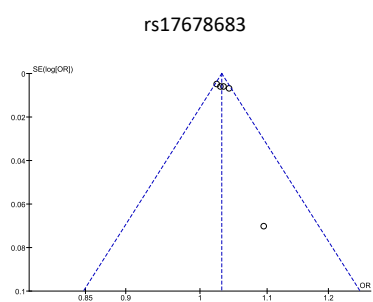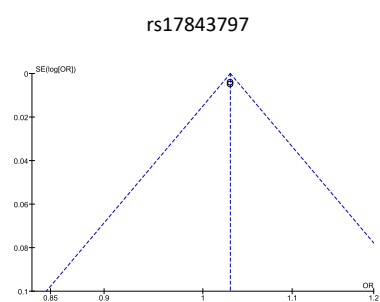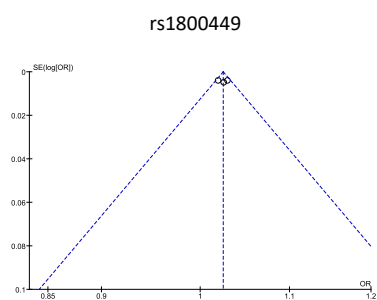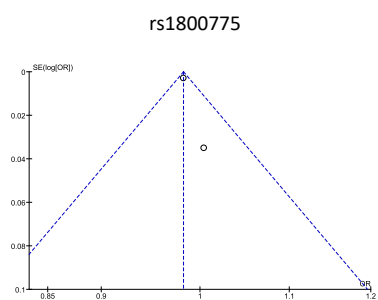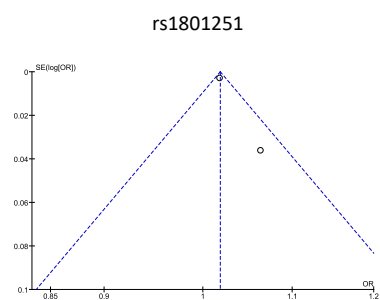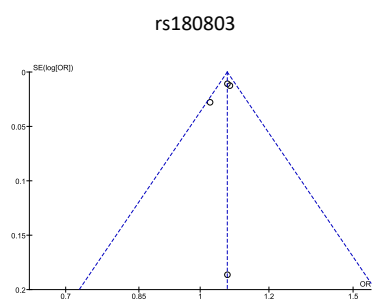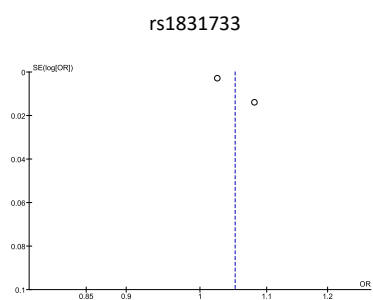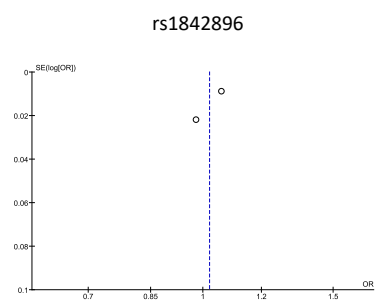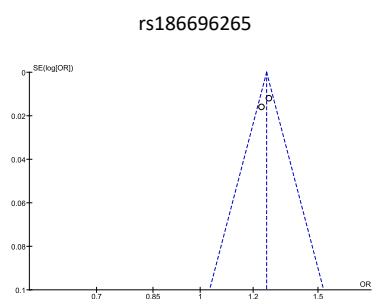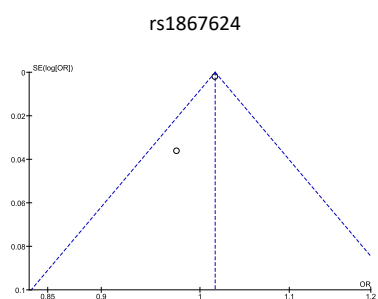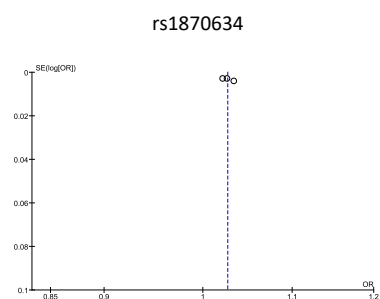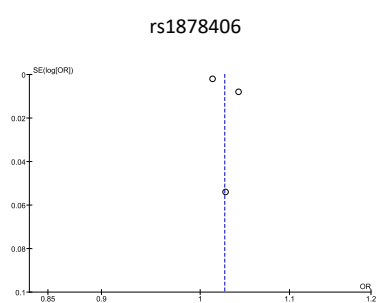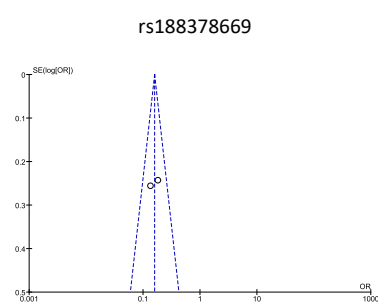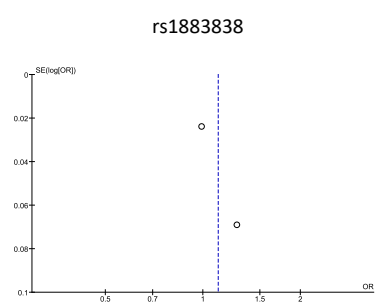

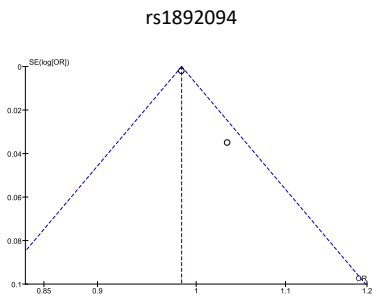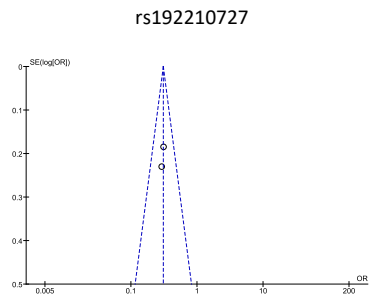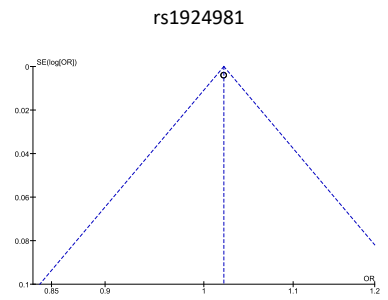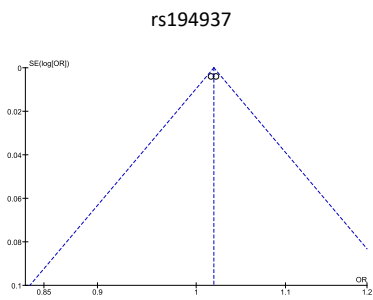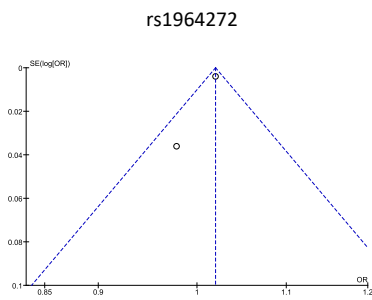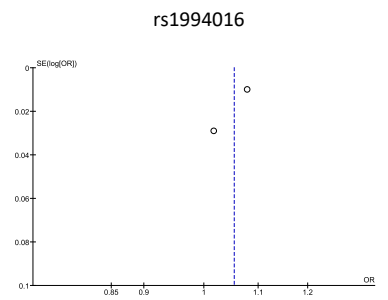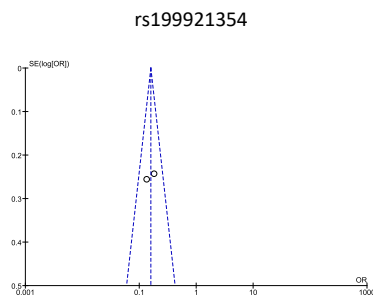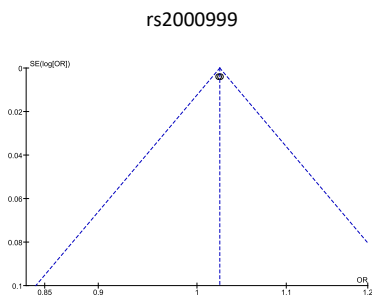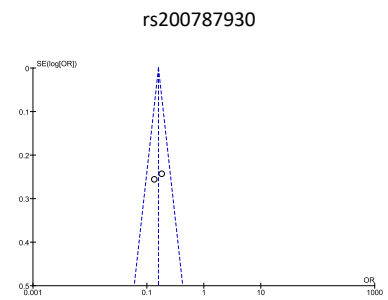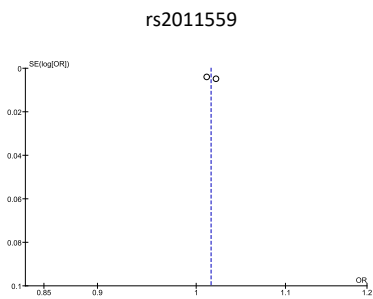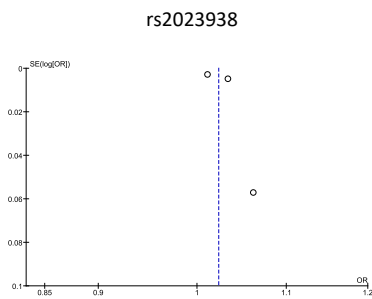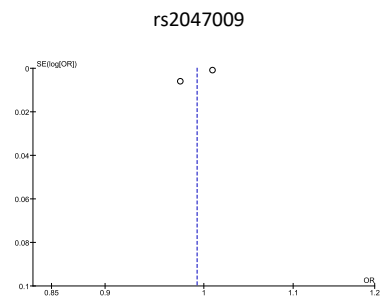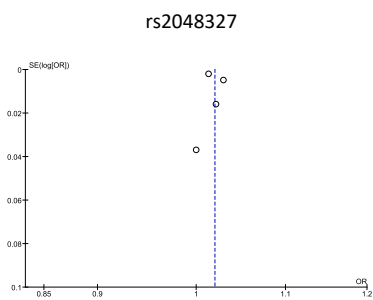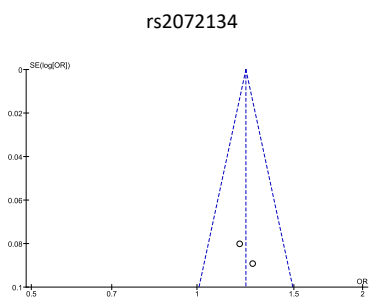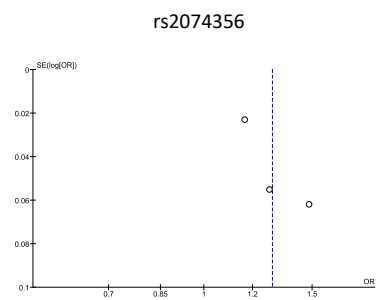

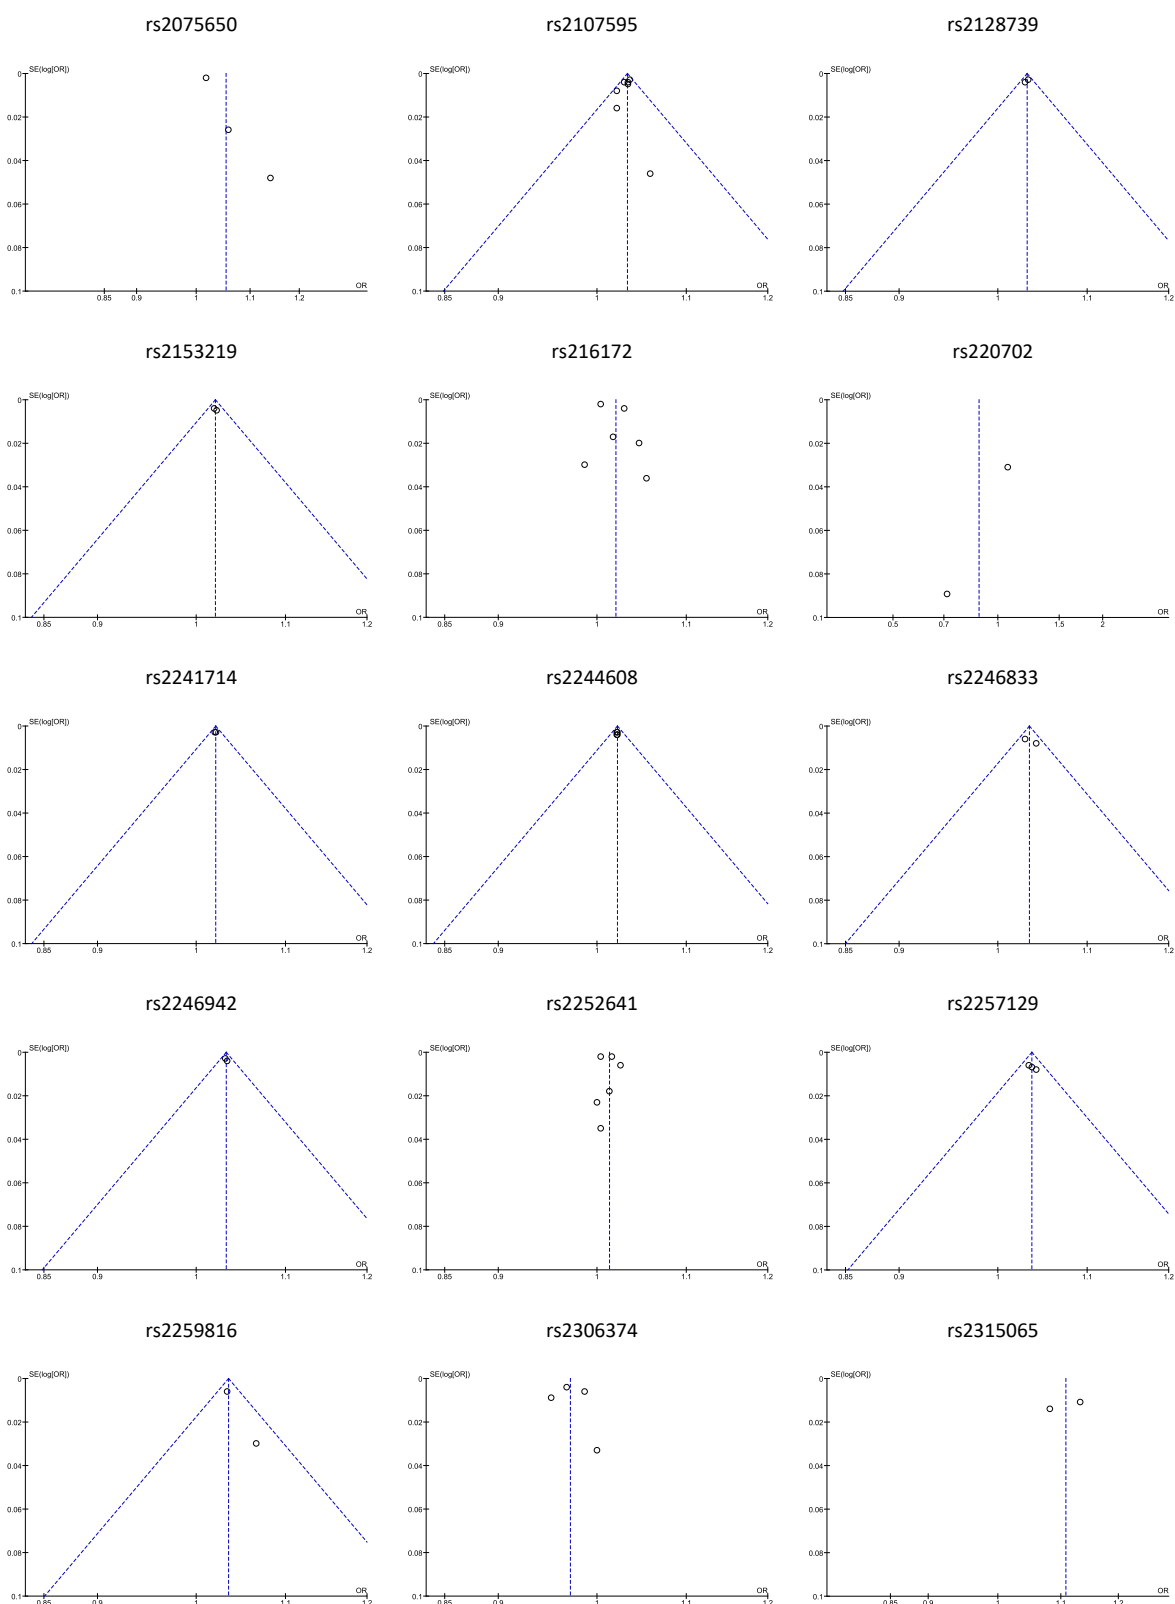

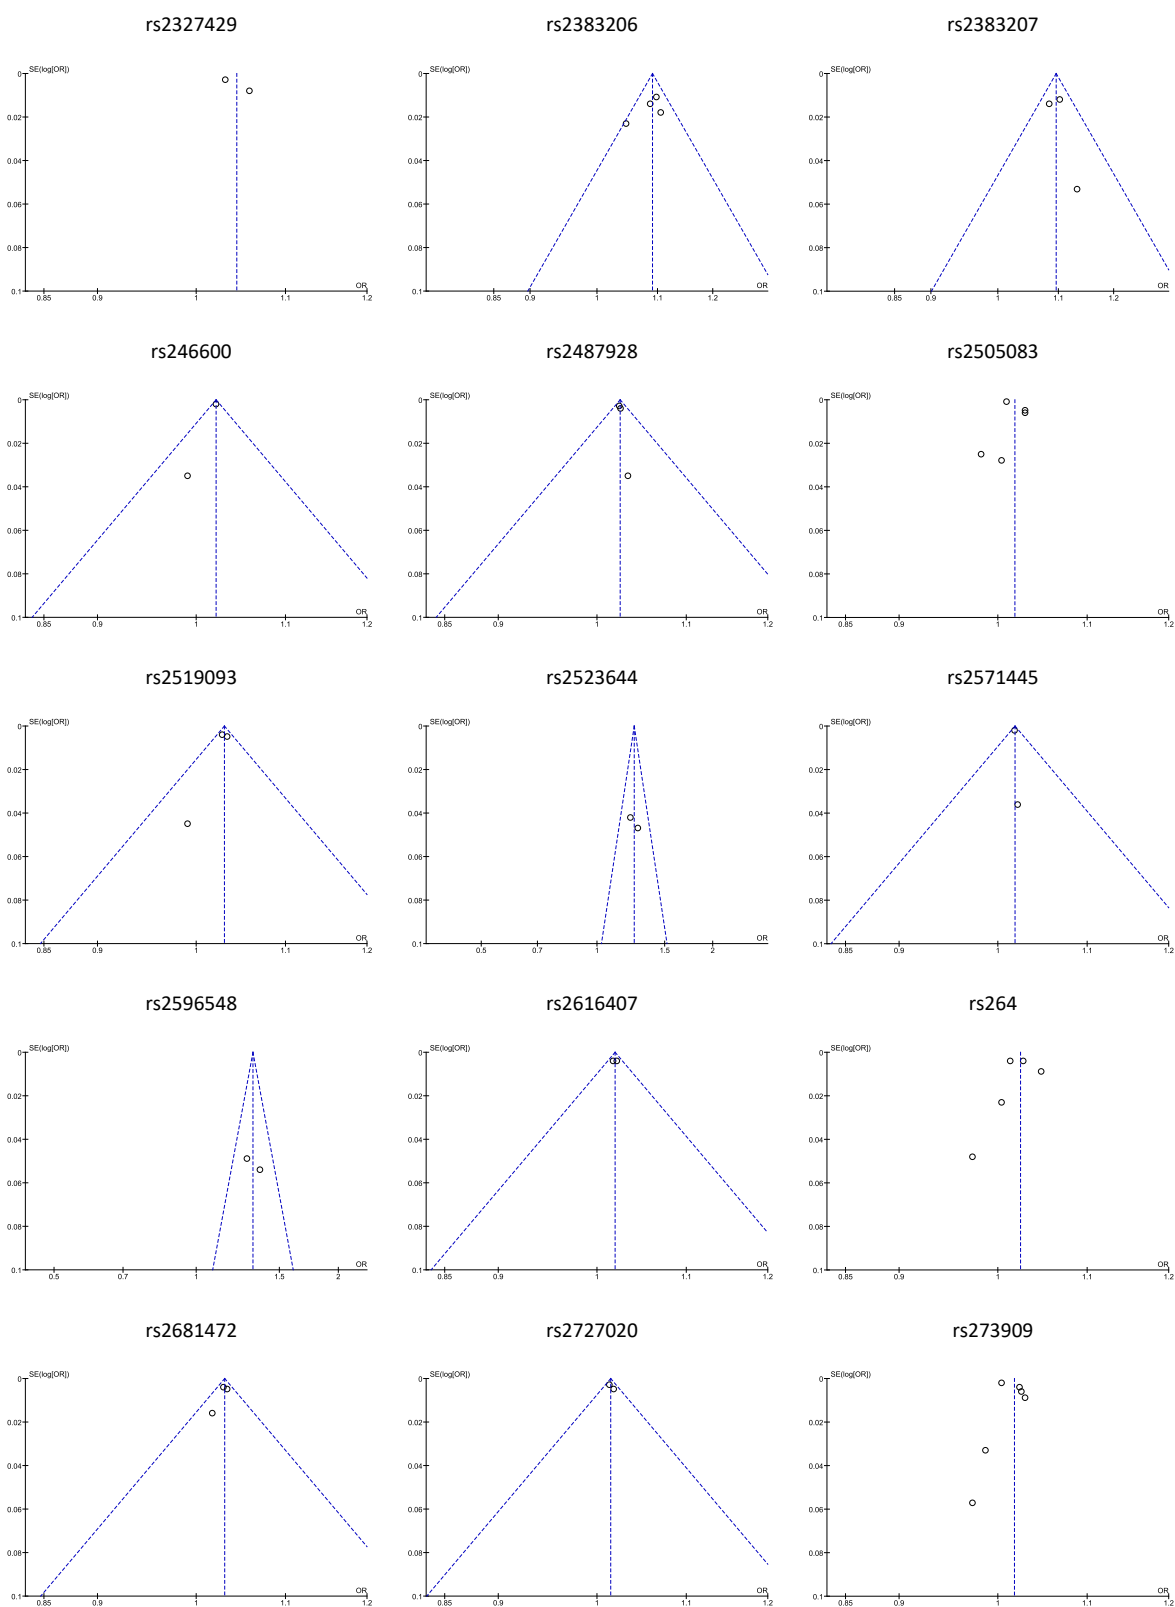

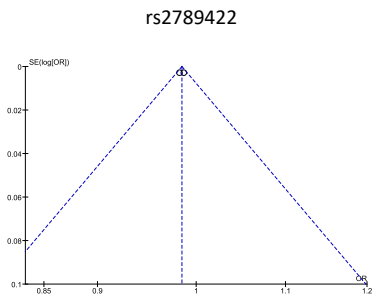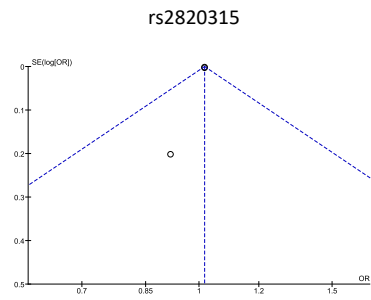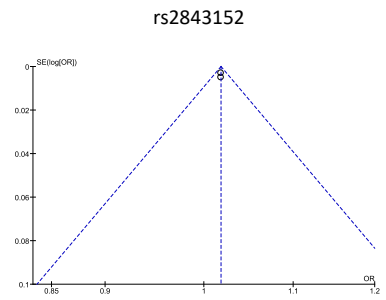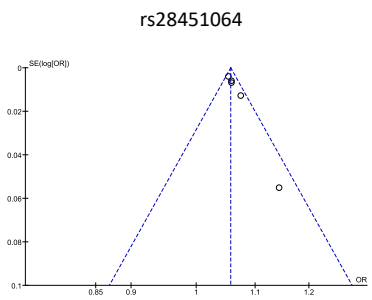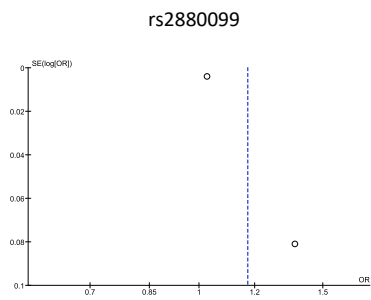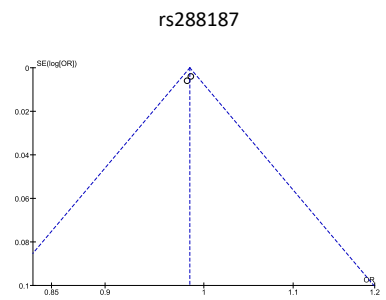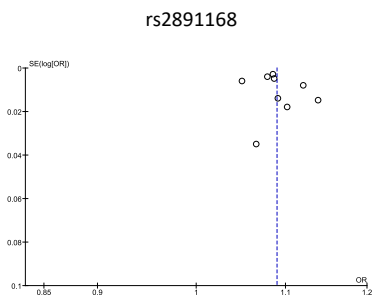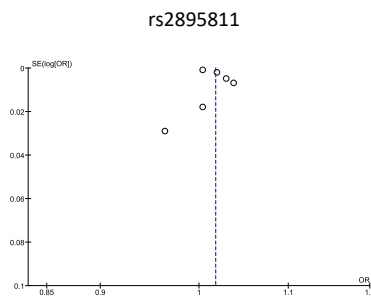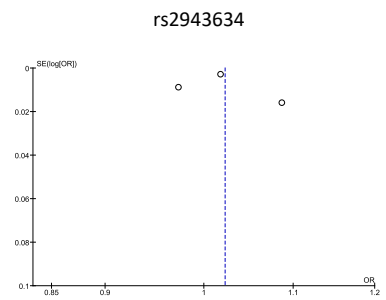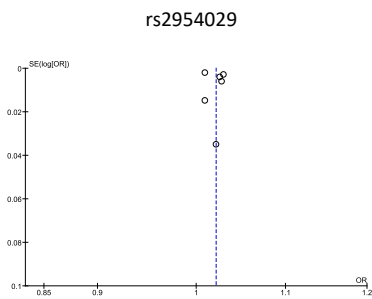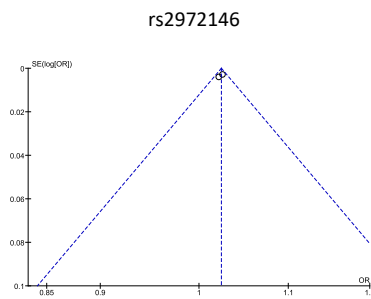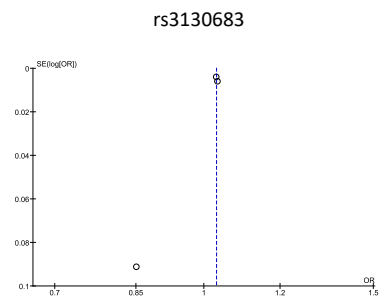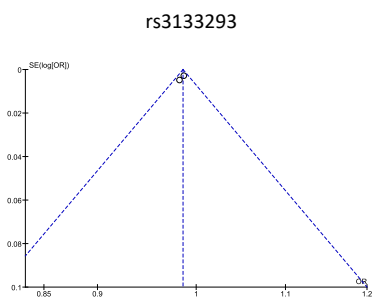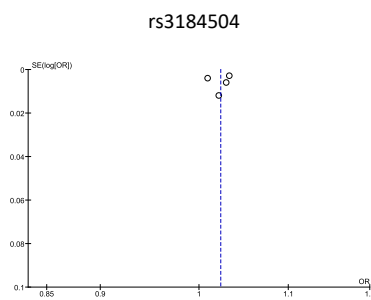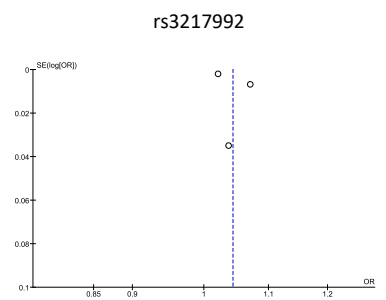

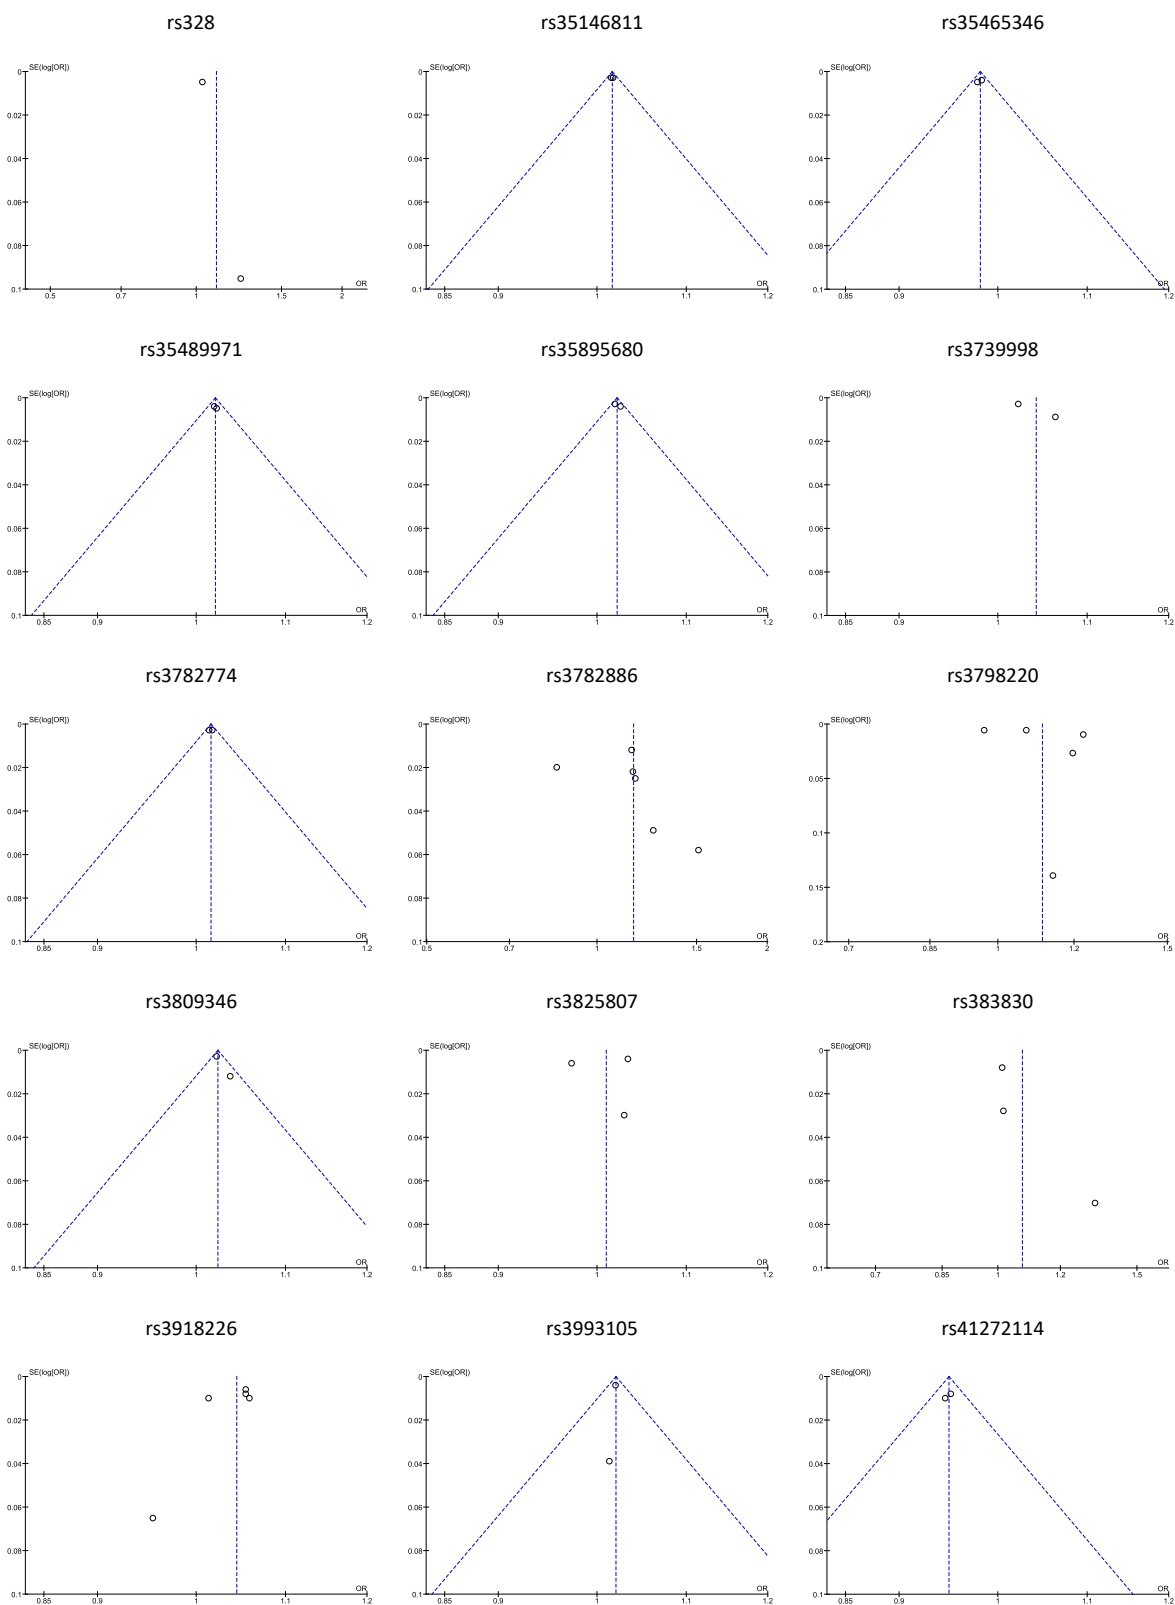

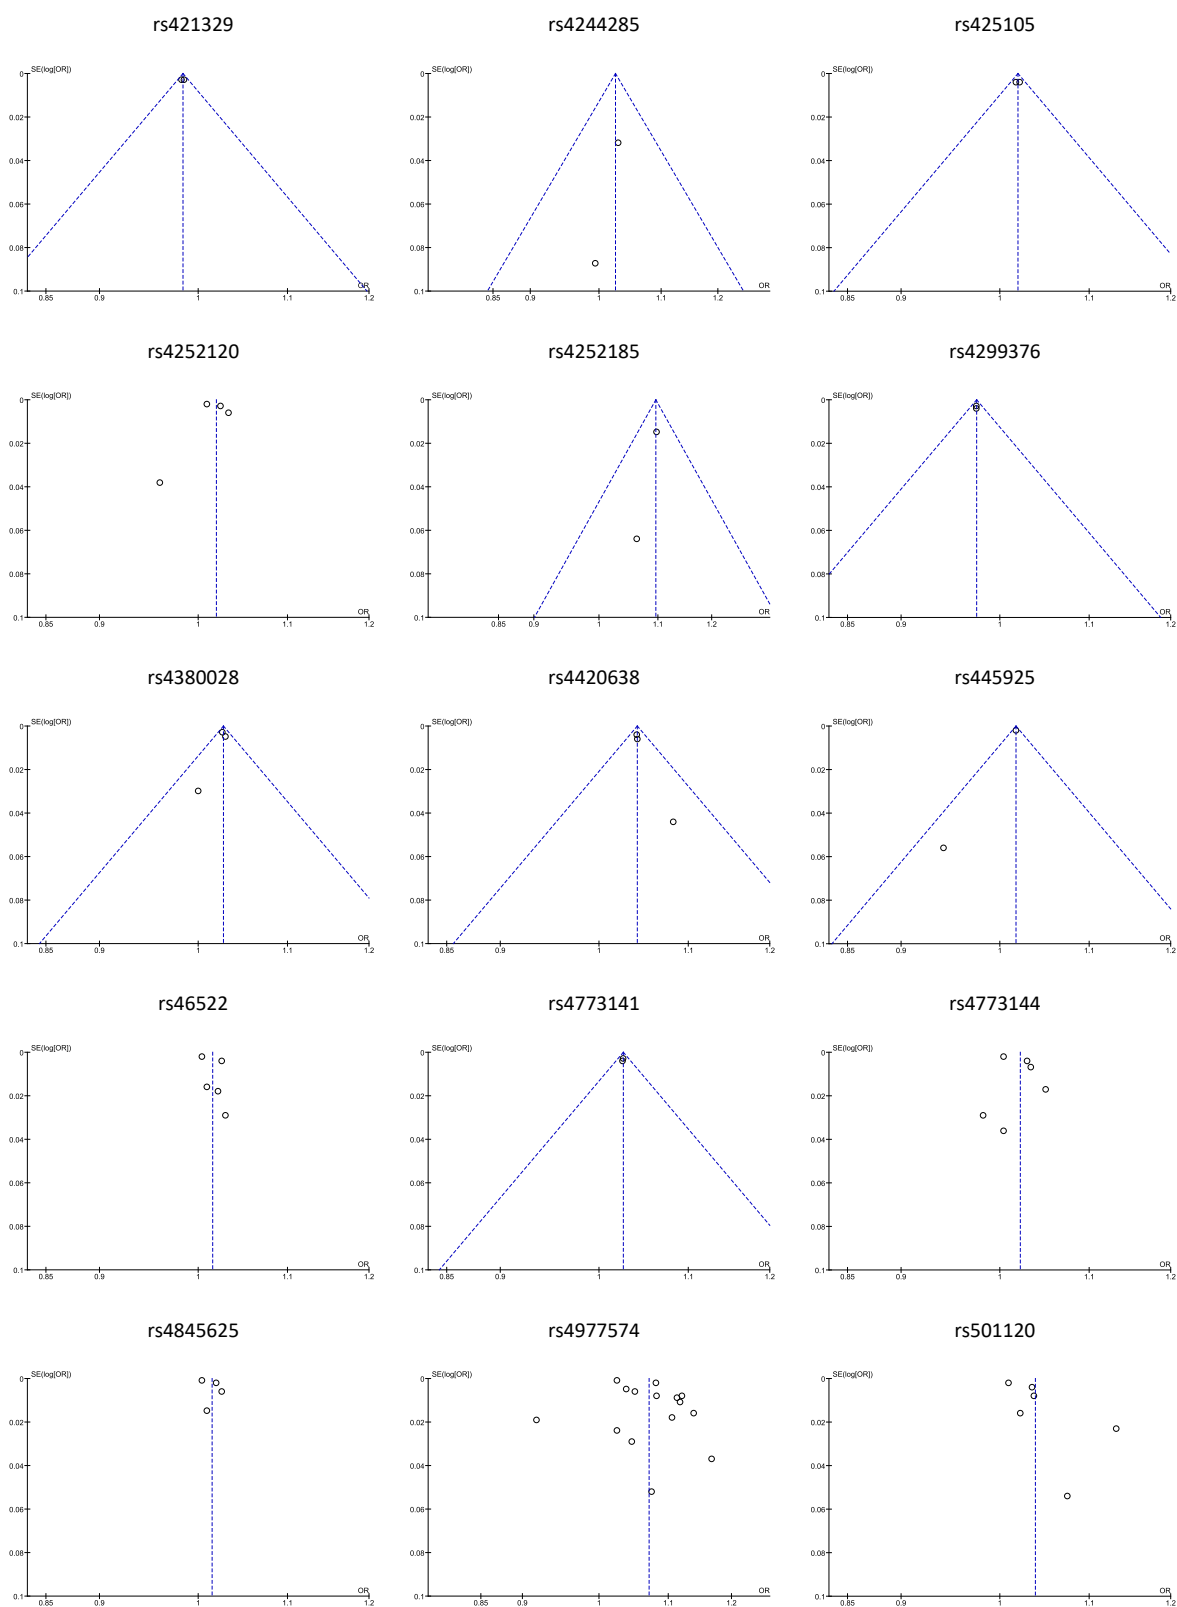

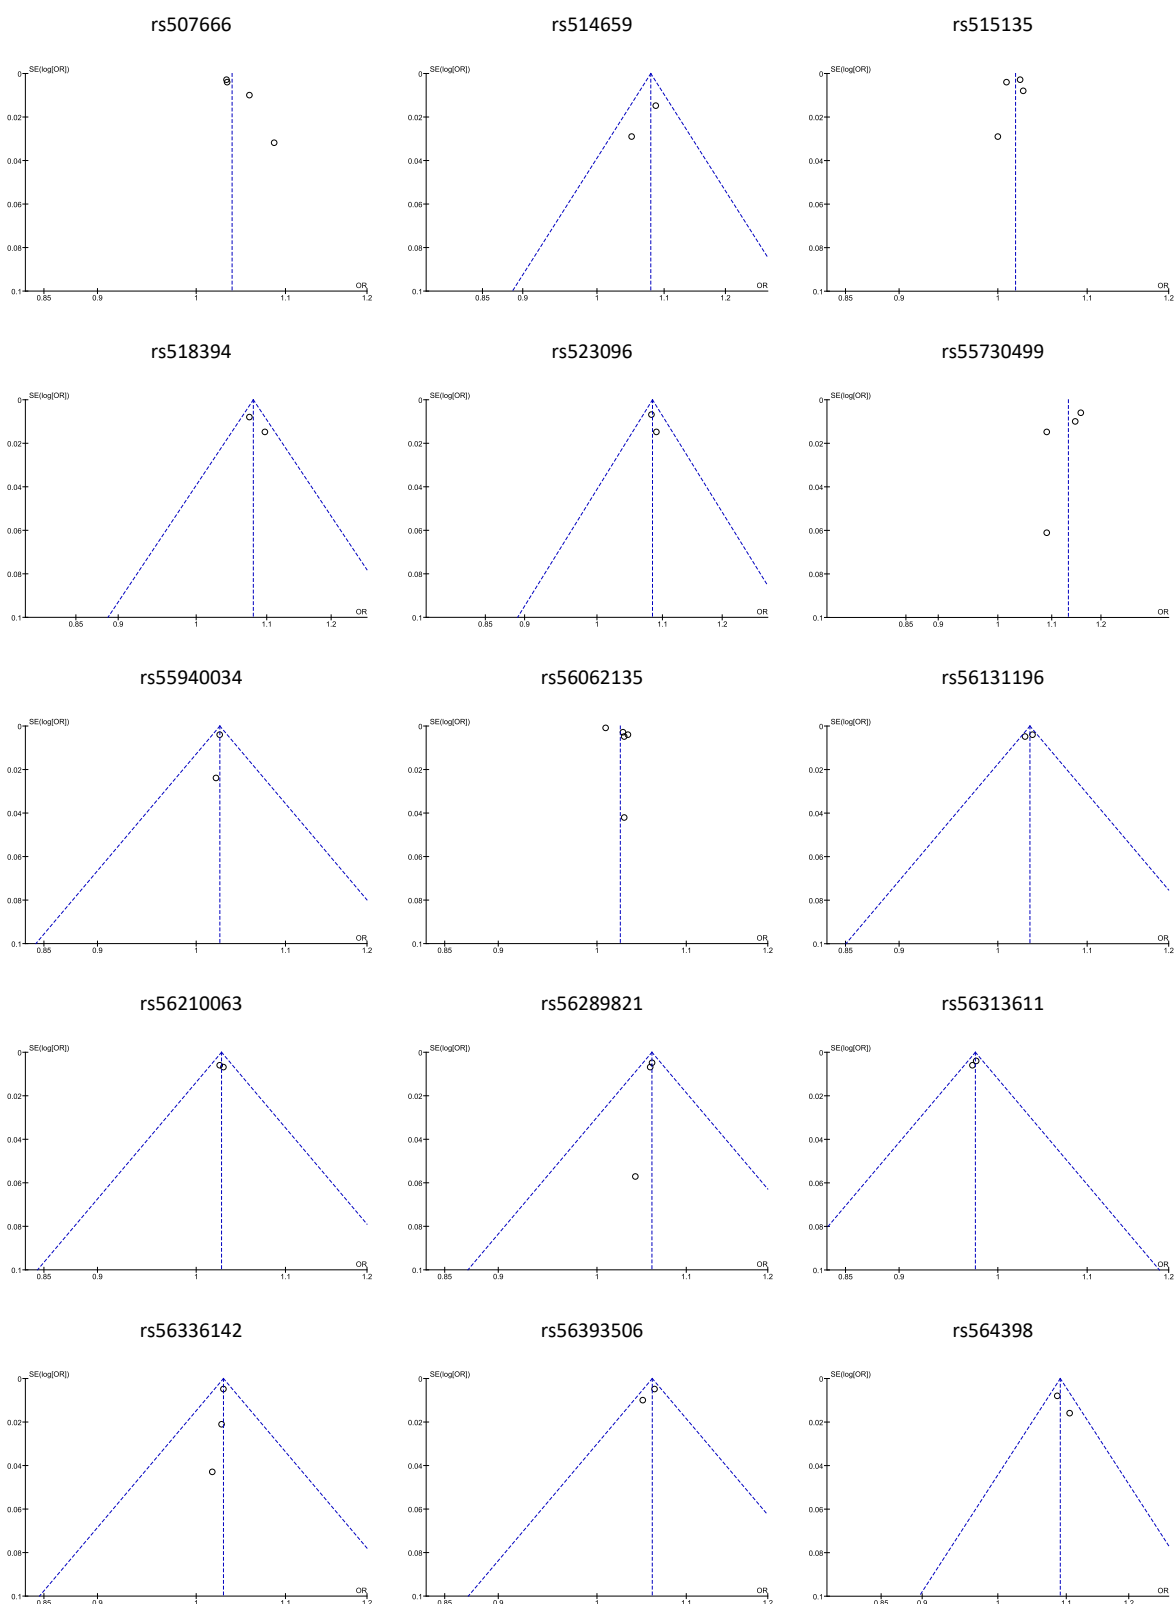

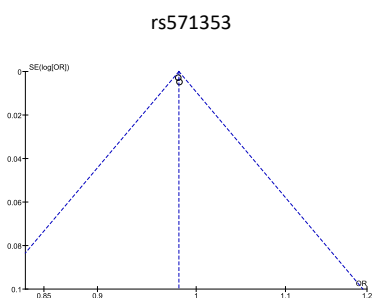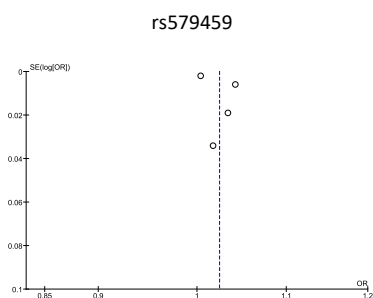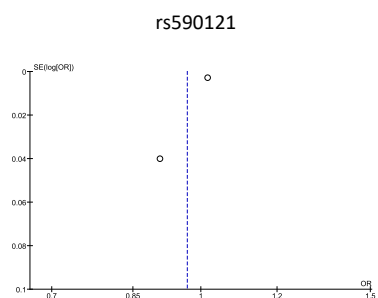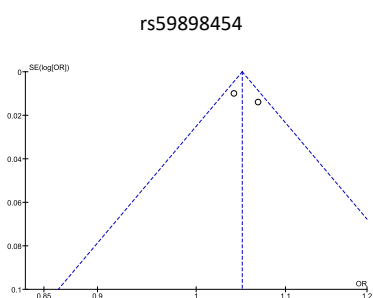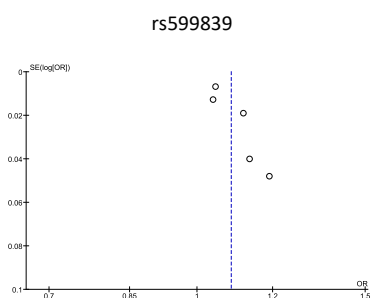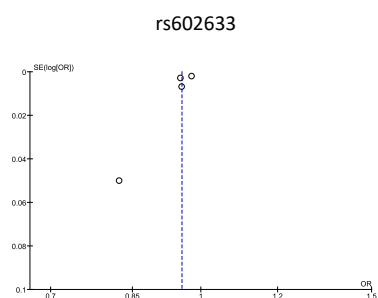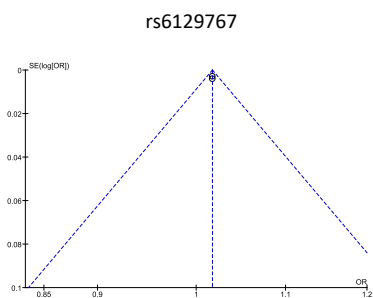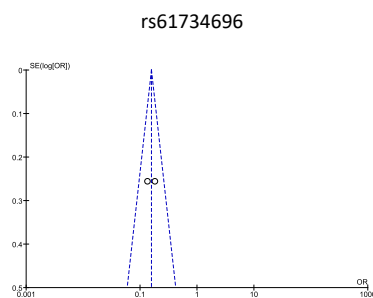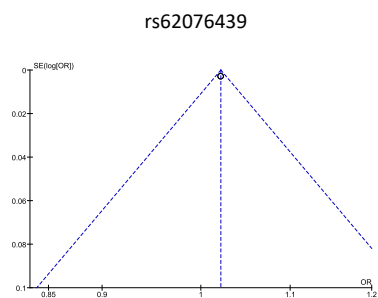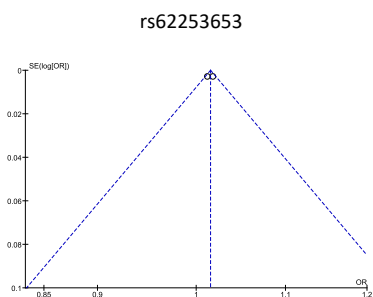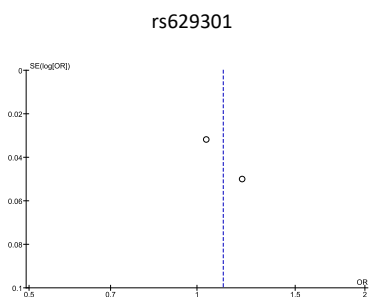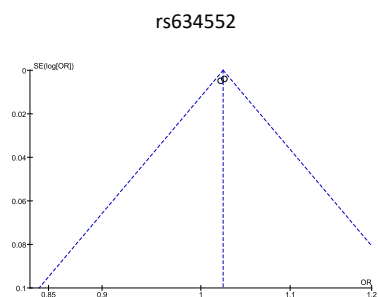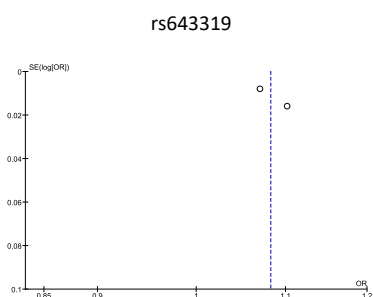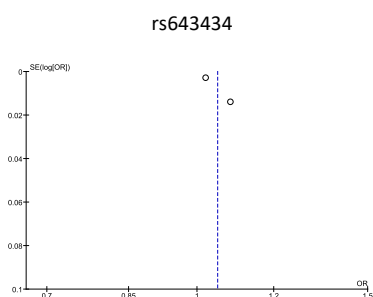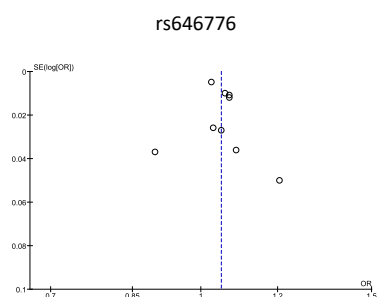

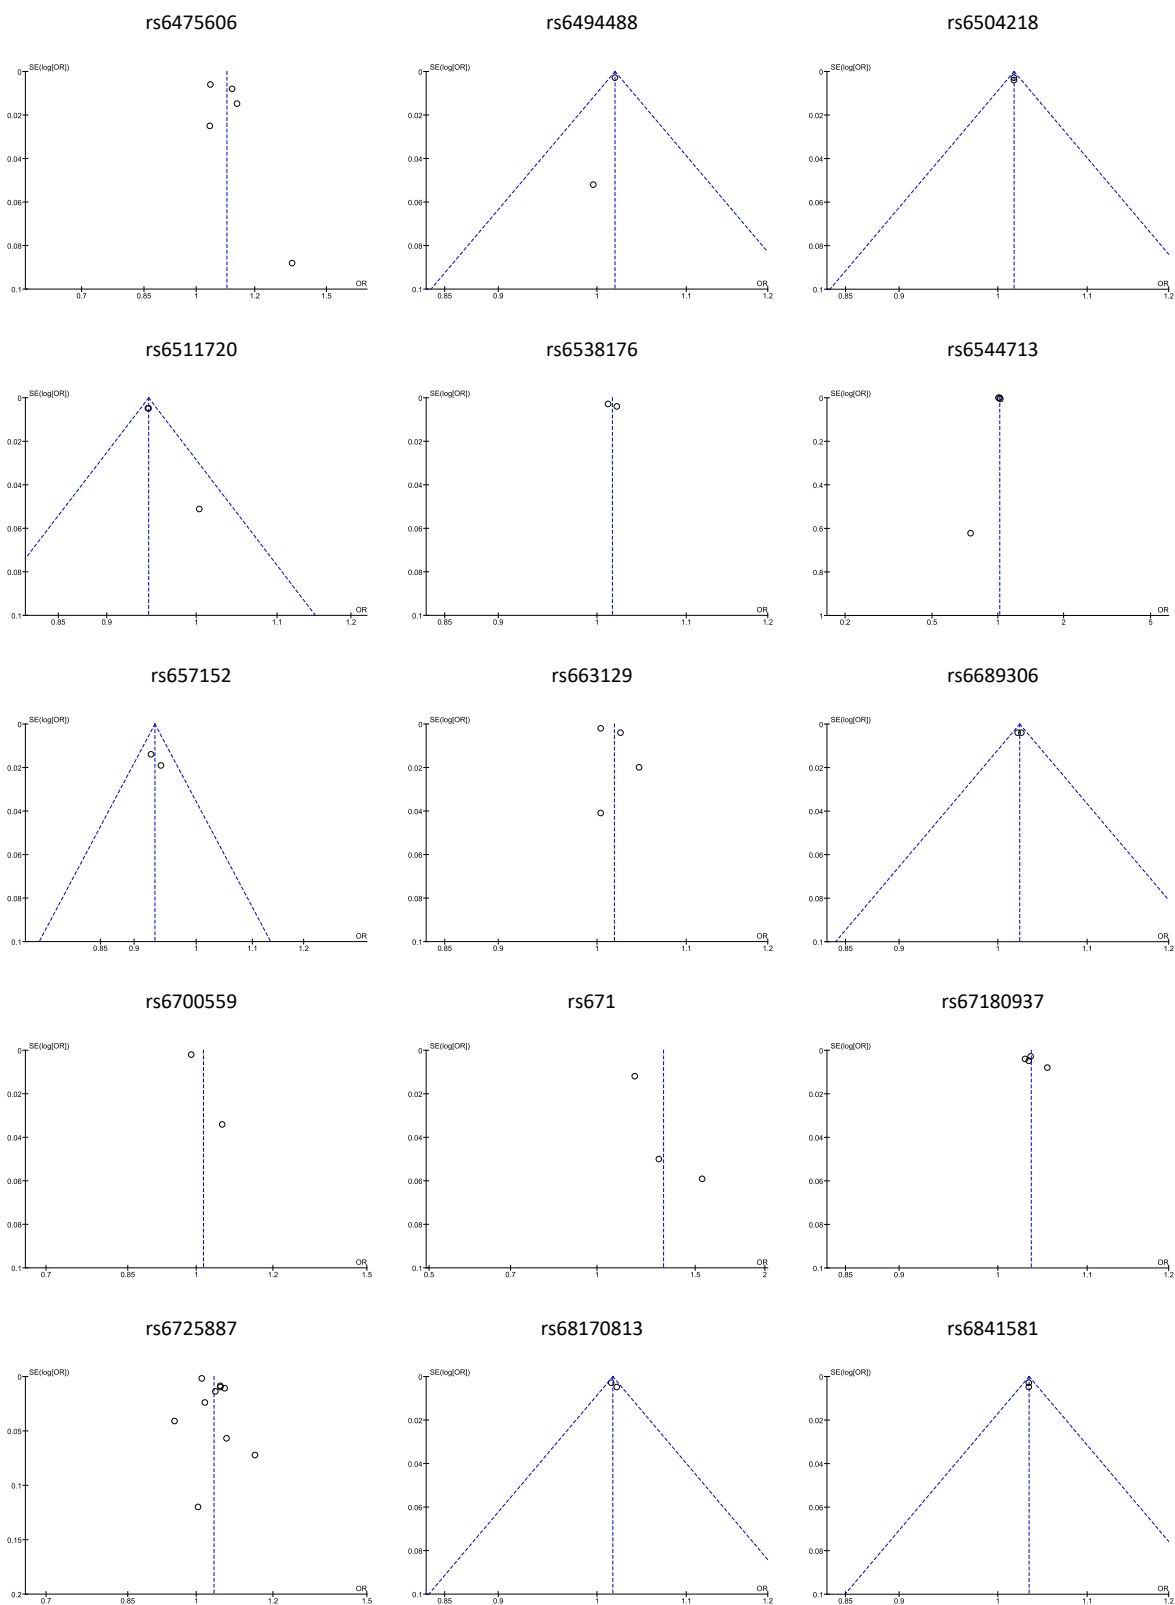

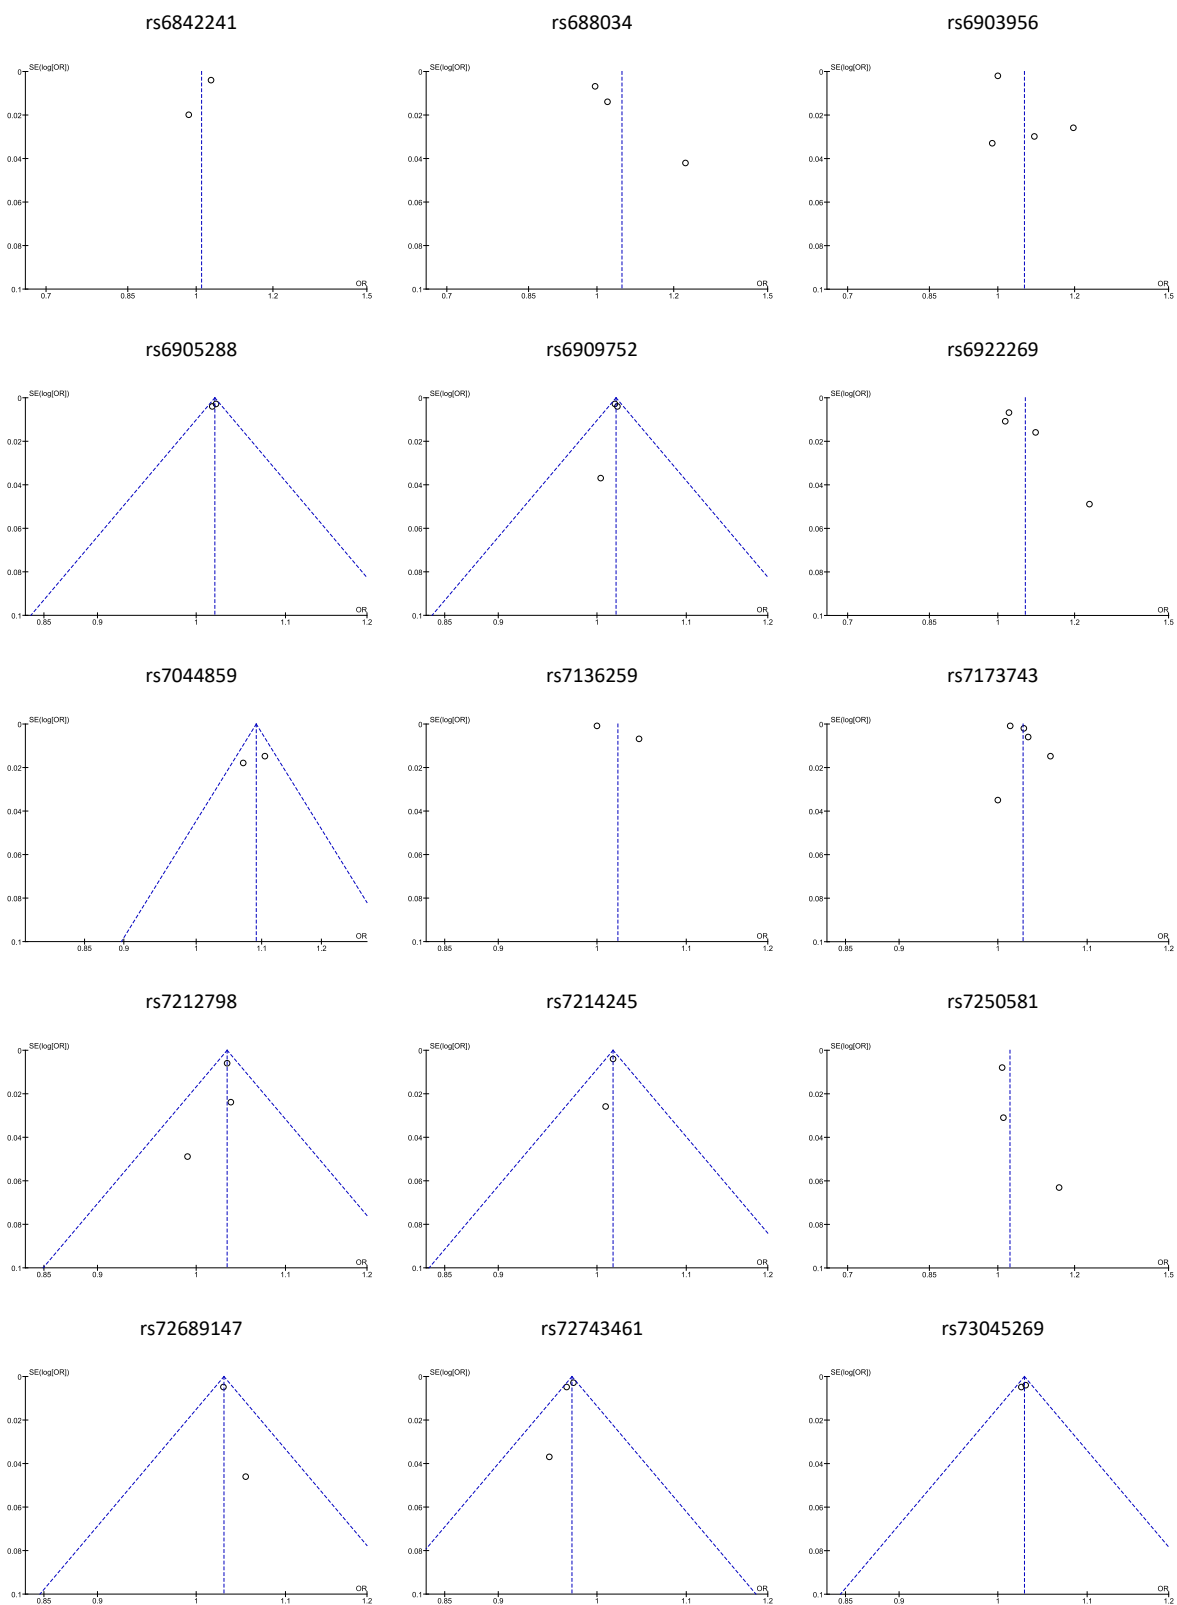

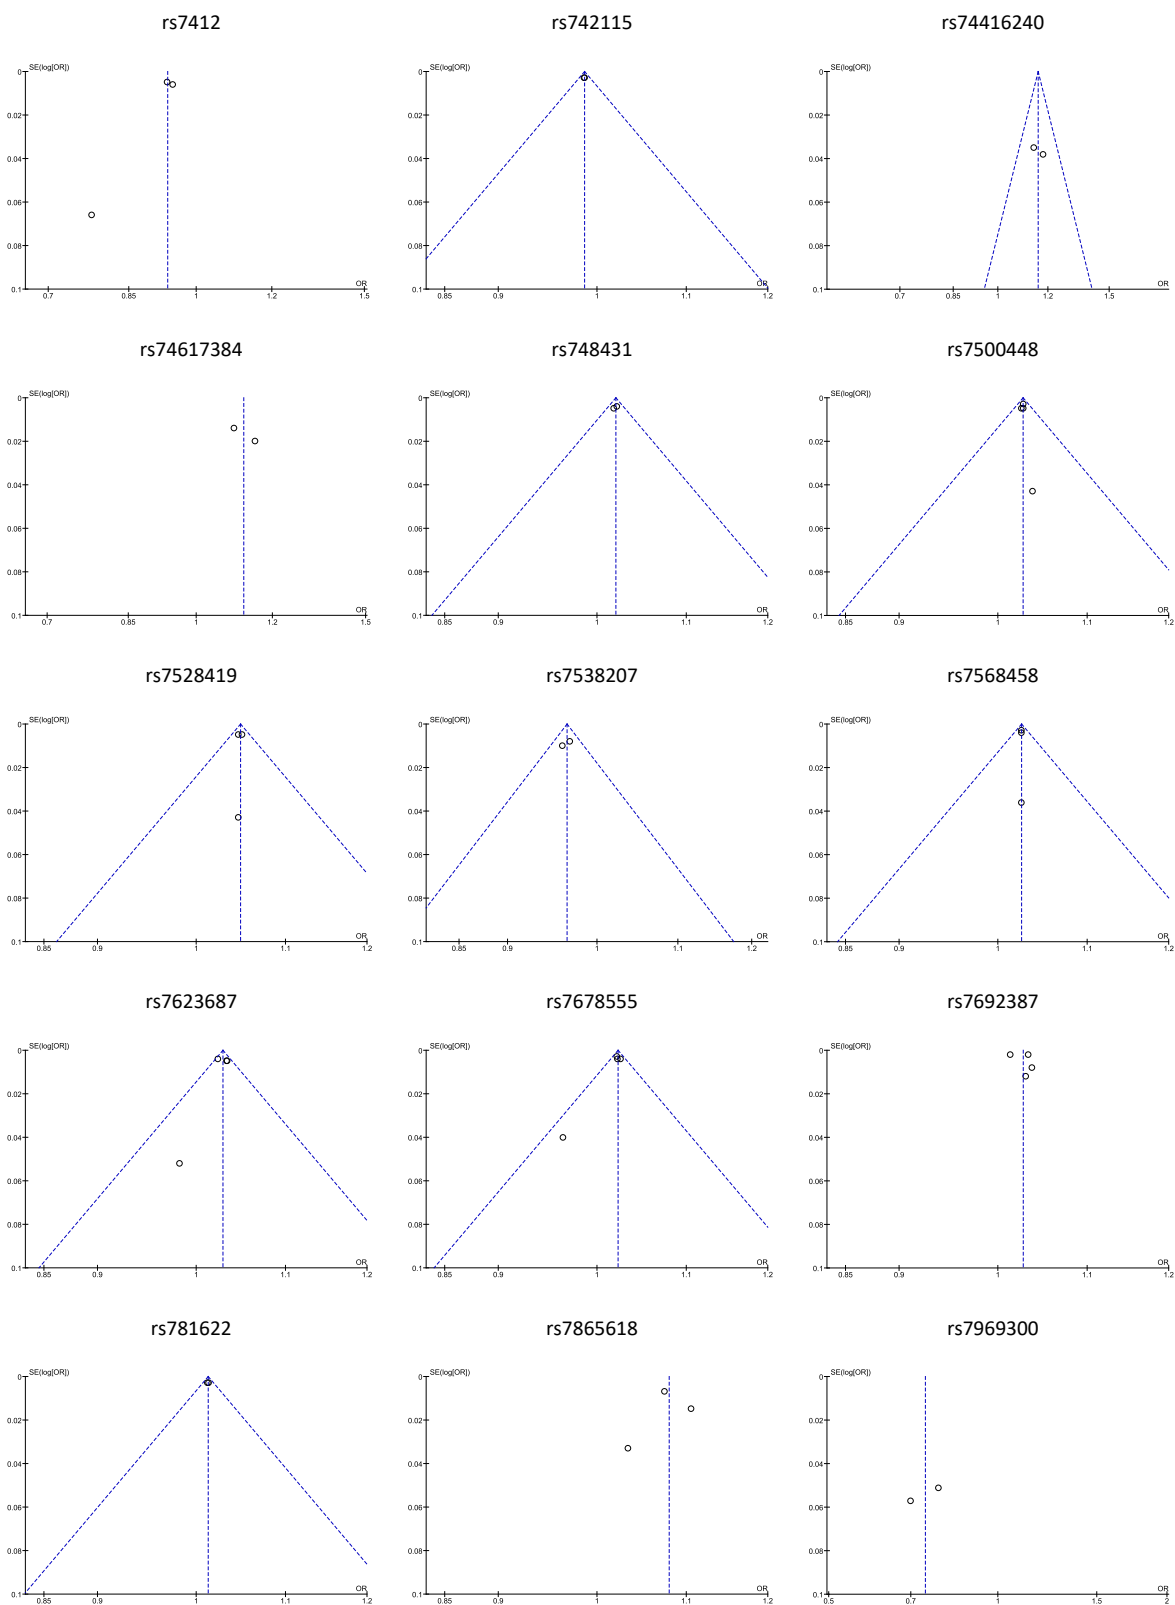

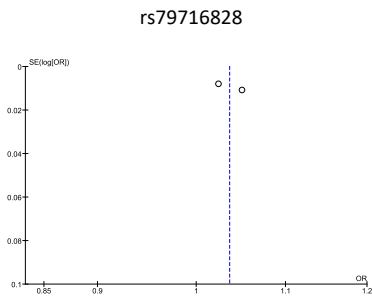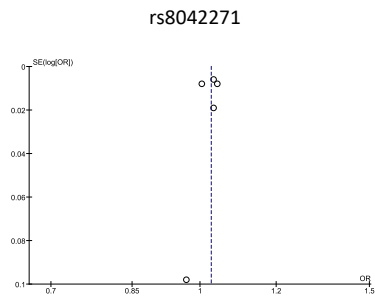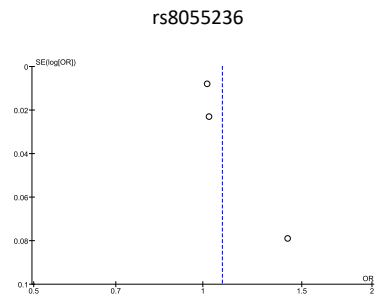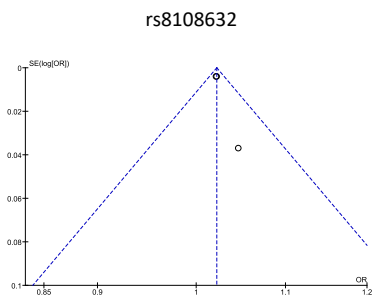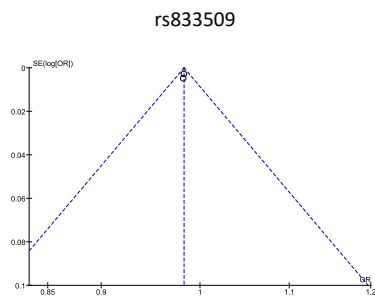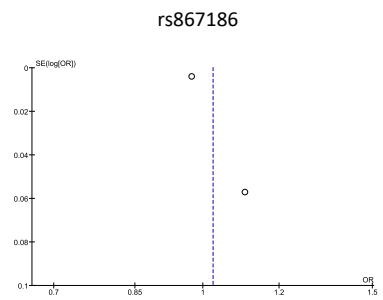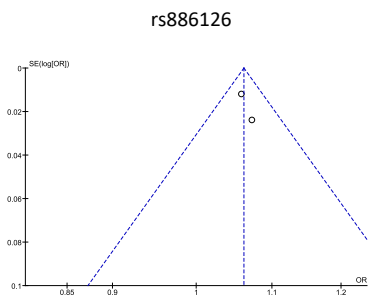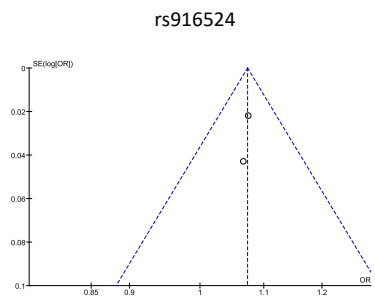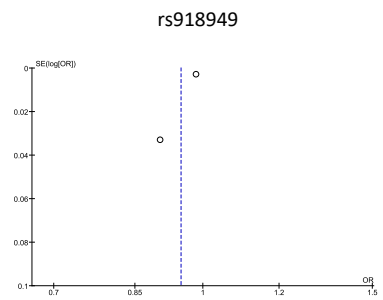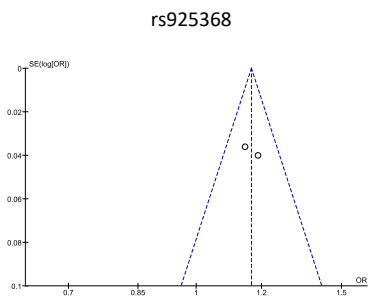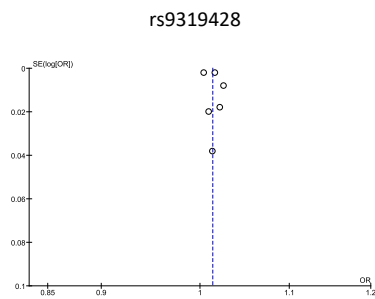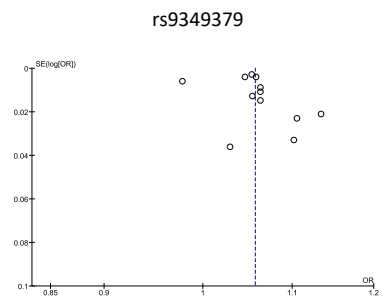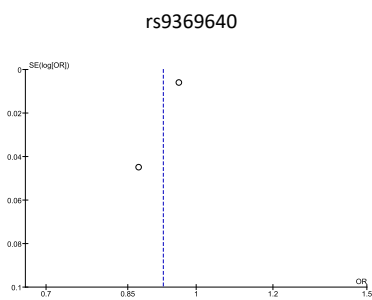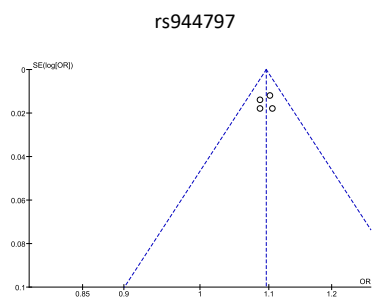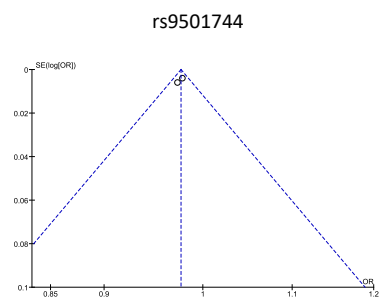

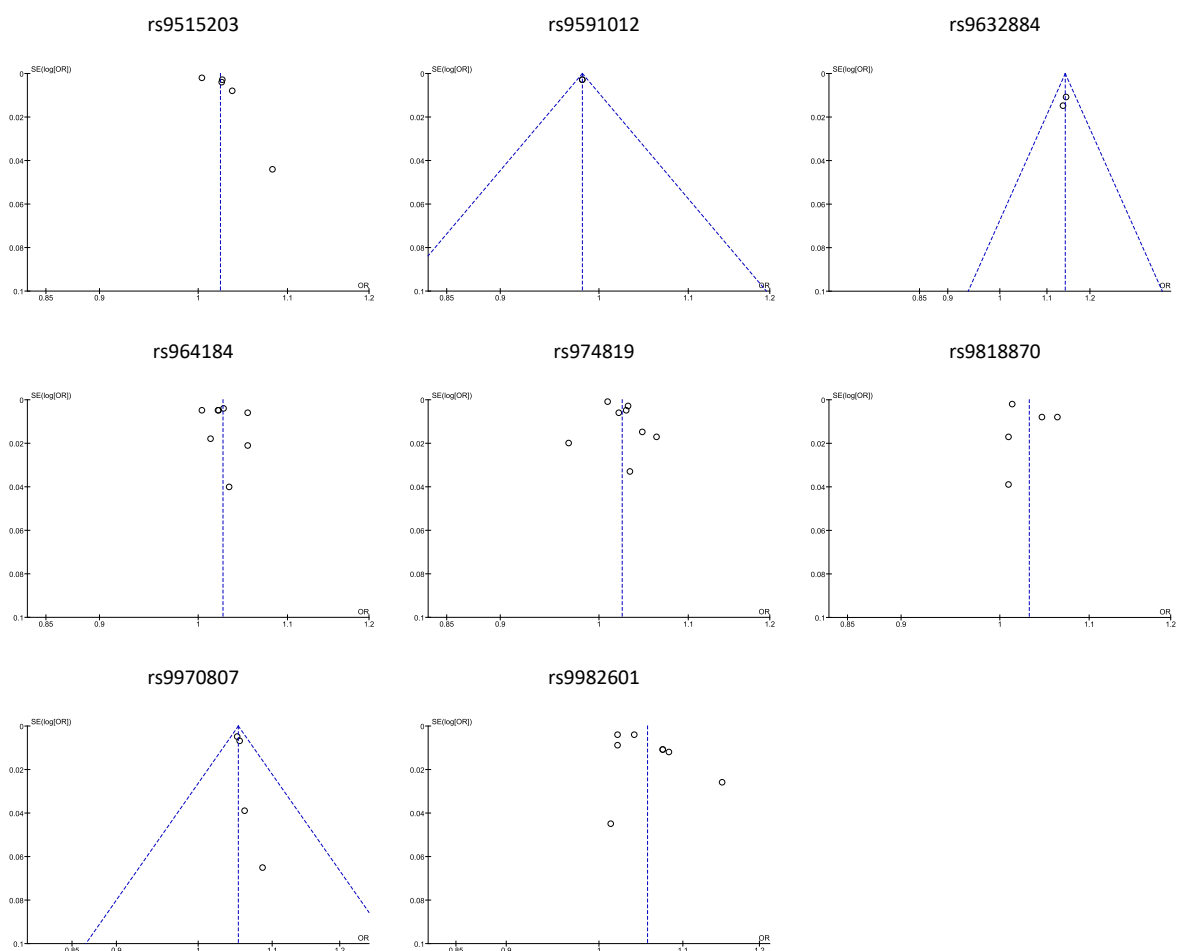

**Figure S3.** Funnel plots for all single nucleotide polymorphisms from 44 GWAS publications included in this paper except for rs4593108.
