# Supplementary material for: Genetic Factors for Coronary Heart Disease and Their Mechanisms: A Meta-Analysis and Comprehensive Review of Common Variants from Genome-Wide Association Studies
Source: MDPI journal article supplement (doi:10.3390/diagnostics12102561), 2022-10-21
Supplement: s1 [file s1]

## rs10139550

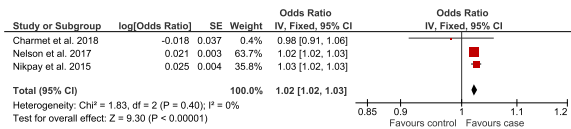

## rs10168194

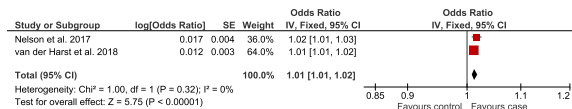

## rs10237377

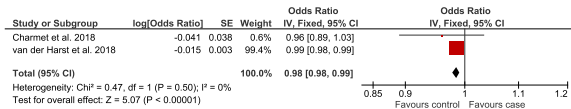

## rs10455872

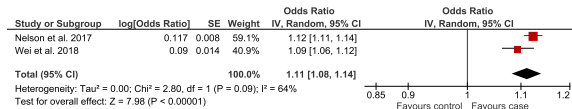

## rs1050362

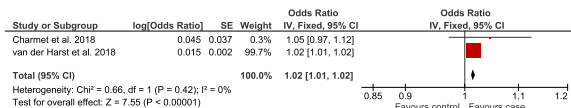

## rs10738607

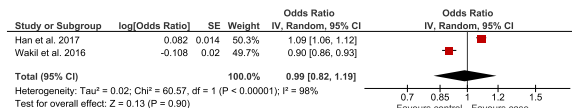

## rs10738609

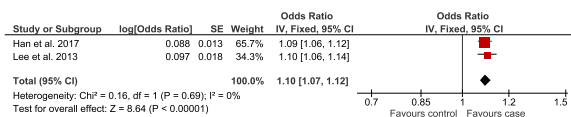

## rs10746041

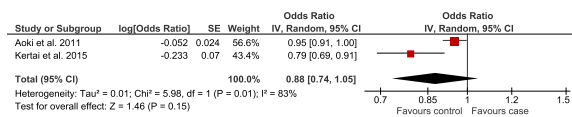

## rs10757264

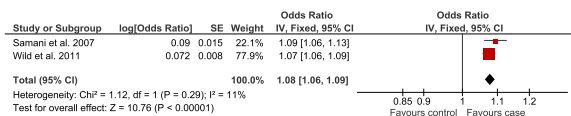

## rs10757270

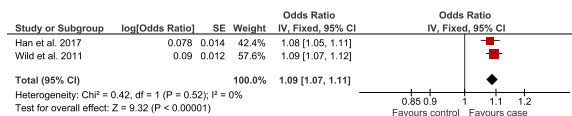

## rs10757272

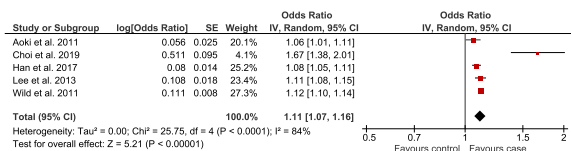

## rs10757274

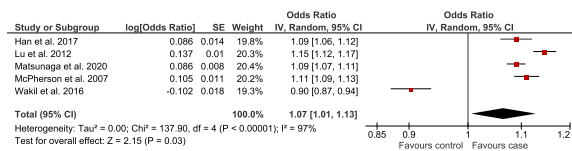

## rs10757275

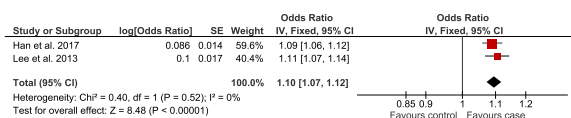

## rs10757278

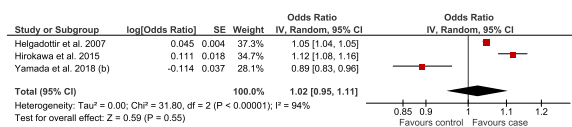

## rs10774610

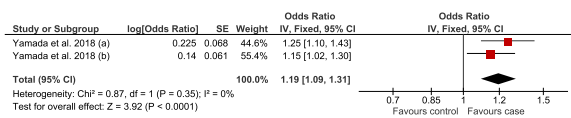

## rs10840293

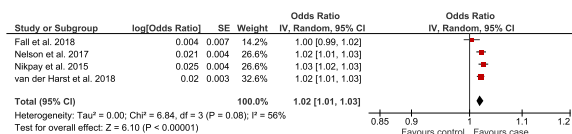

## rs10841443

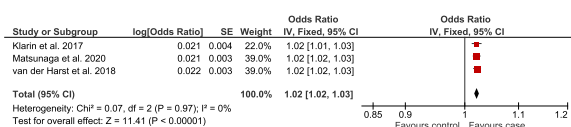

## rs10849915

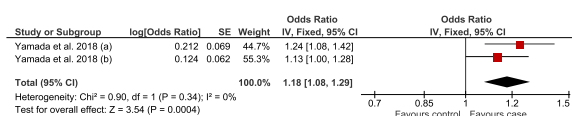

## rs10857147

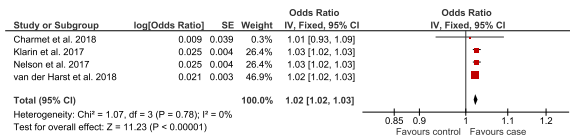

## rs1088868

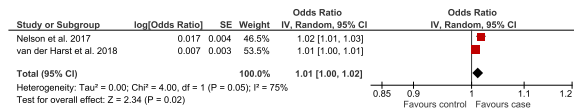

## rs10947262

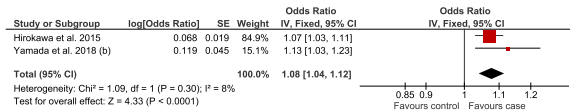

## rs10947789

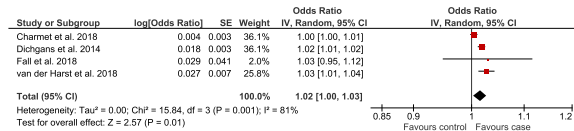

## rs10953541

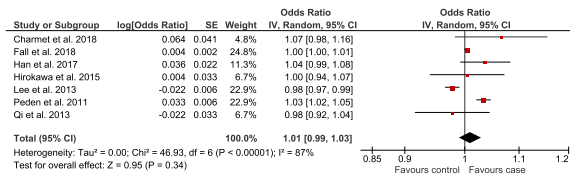

## rs10965212

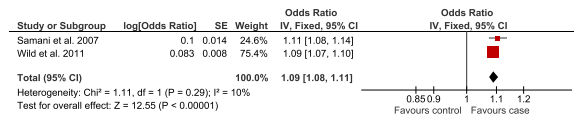

## rs10965215

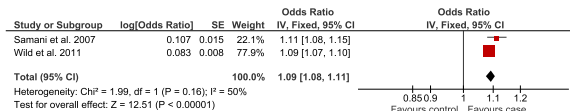

## rs10965219

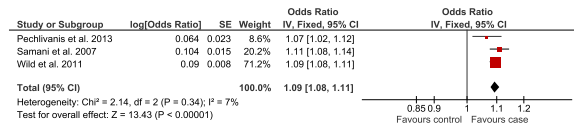

## rs11042937

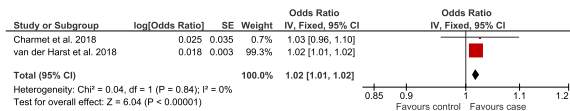

## rs11057401

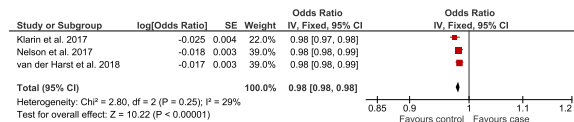

## rs11057830

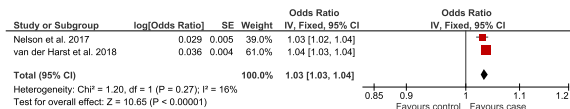

## rs11065979

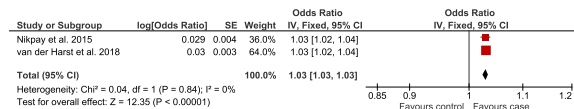

## rs11066001

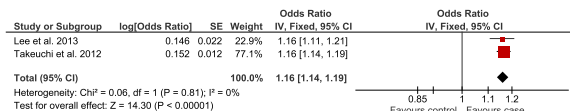

## rs11066015

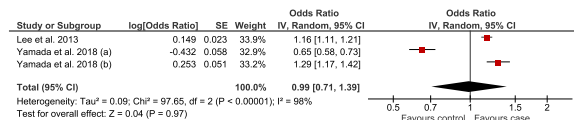

## rs11066280

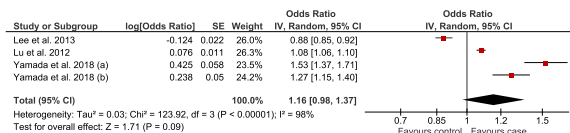

## rs11099493

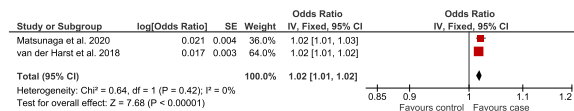

## rs111245230

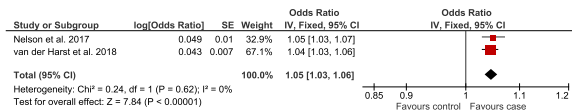

## rs11170820

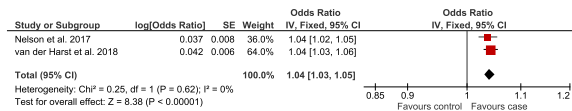

## rs11172113

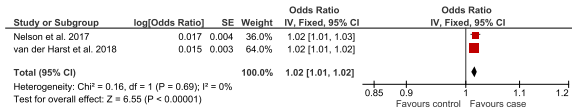

## rs11191416

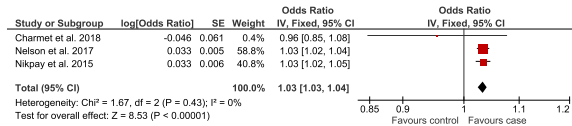

## rs11203042

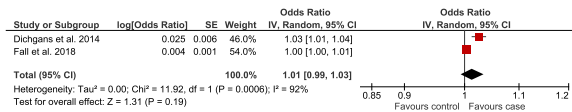

## rs11206510

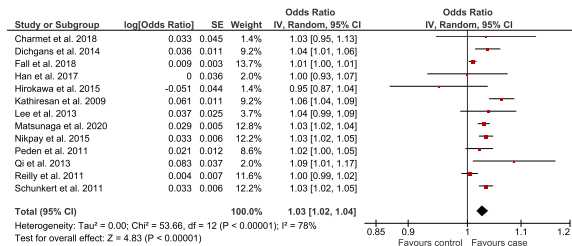

## rs1122608

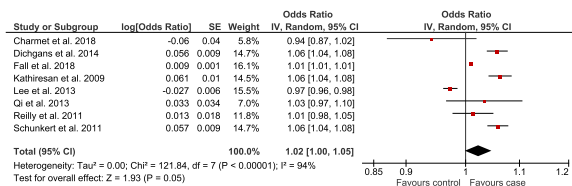

## rs112635299

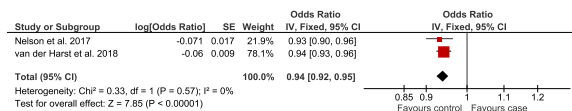

## rs112941079

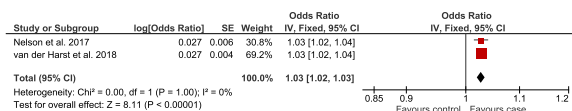

## rs11509880

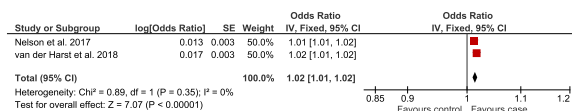

## rs115287176

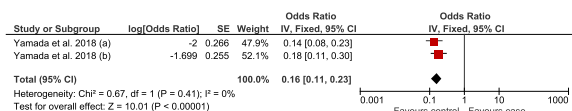

## rs11556924

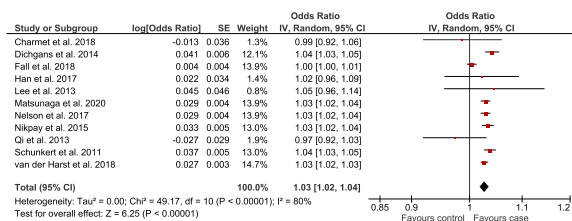

## rs11591147

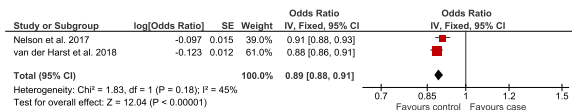

## rs11617955

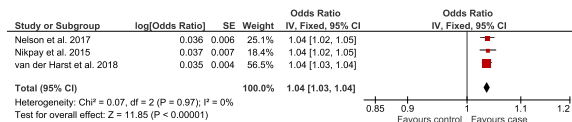

## rs116843064

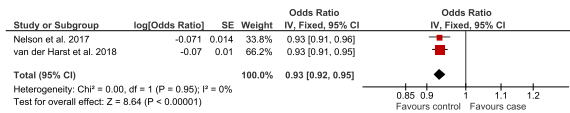

## rs11728590

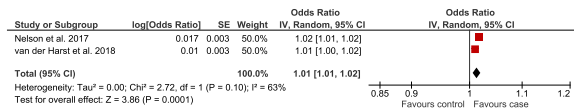

## rs11752643

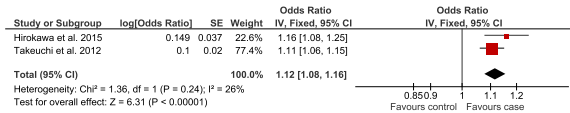

## rs11810571

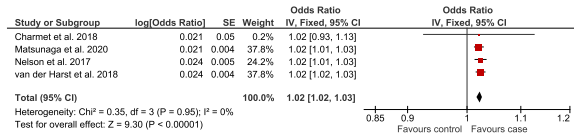

## rs11823828

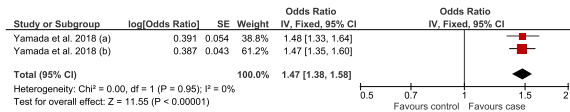

## rs11838776

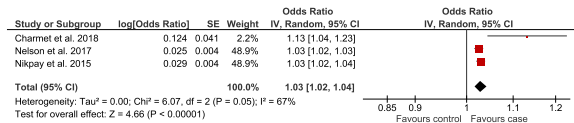

## rs12146487

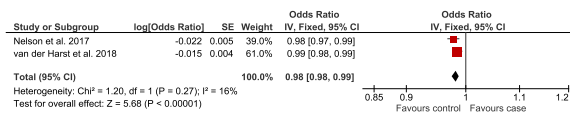

## rs1214752

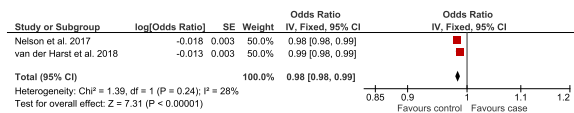

## rs12190287

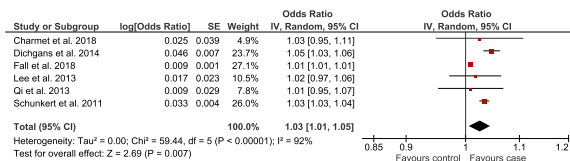

## rs12202017

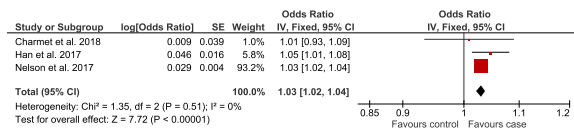

## rs12229654

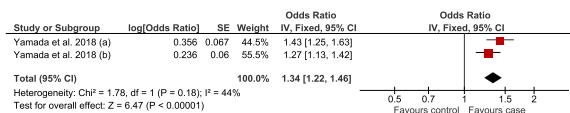

## rs12231744

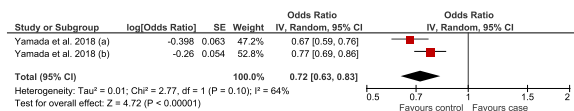

## rs12413409

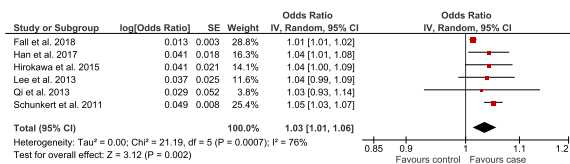

## rs12493885

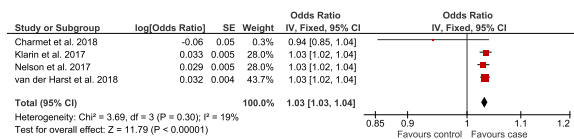

## rs1250229

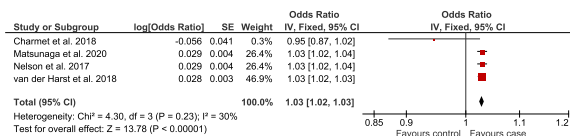

## rs12524865

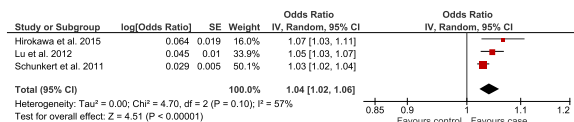



rs12526453

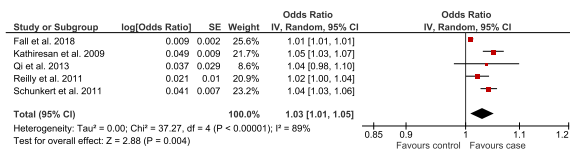

rs12740374

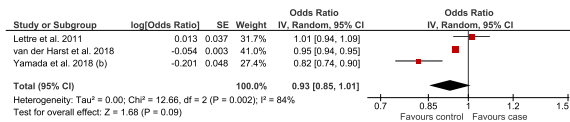

rs12922

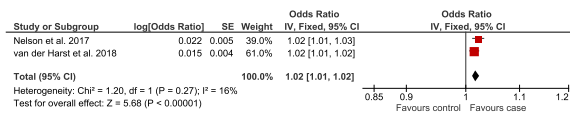

rs13003675

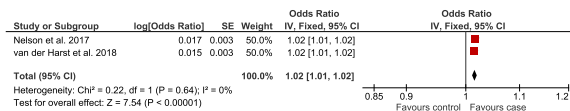

rs1333045

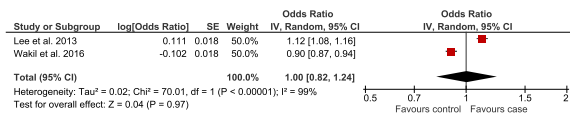

rs1333049

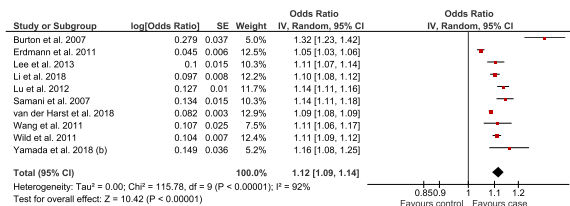

rs13734

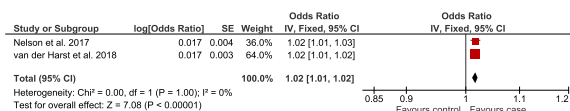

rs12619842

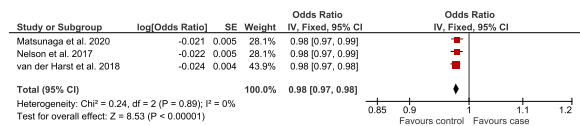

rs12801636

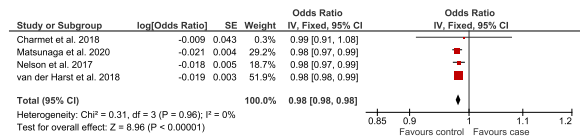

rs12936587

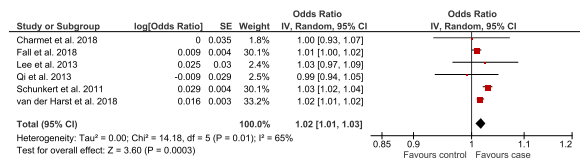

rs1333042

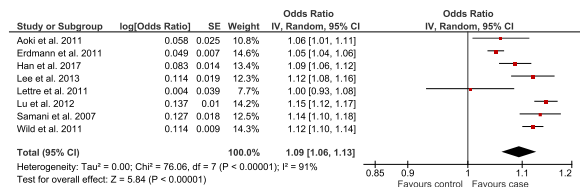

rs1333048

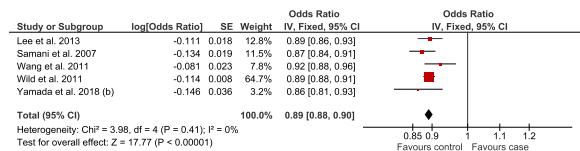

rs13723

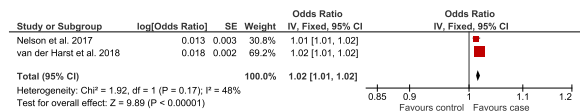

rs1378942

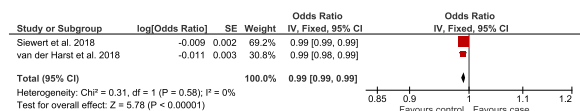

rs140570886

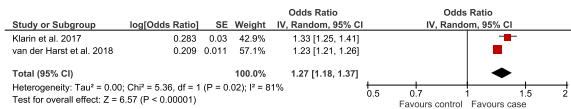

rs1412444

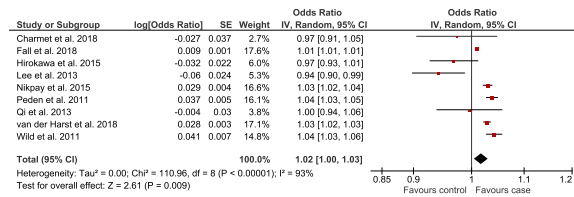

rs1412834

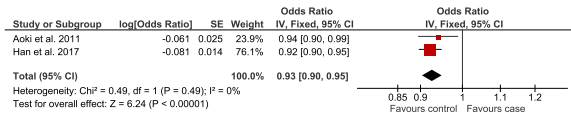

rs142695226

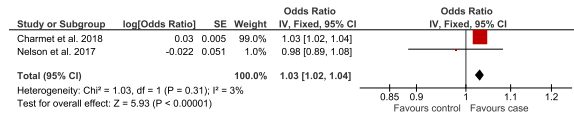

rs143803699

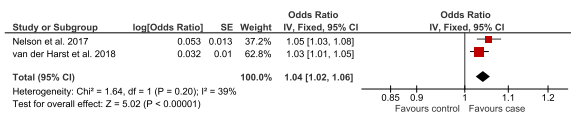

rs146092501

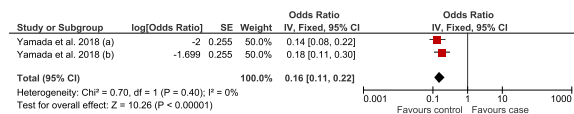

rs146879198

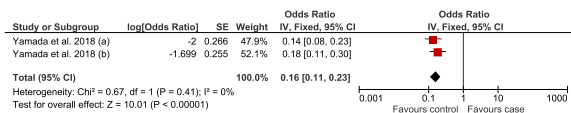

rs147555597

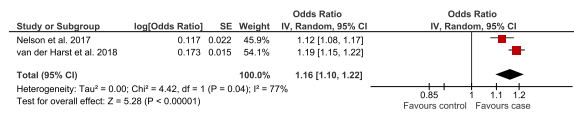

rs1537372

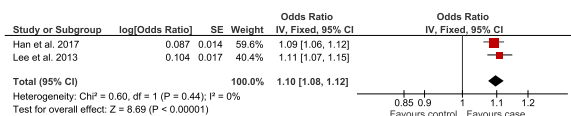

rs1537373

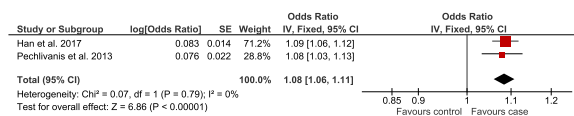

rs1537376

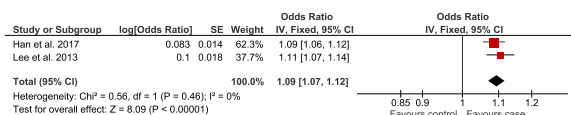

rs1561198

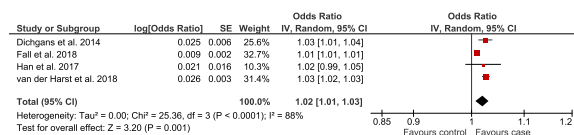

rs167479

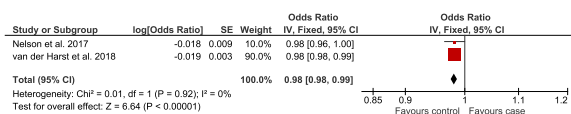

rs16986953

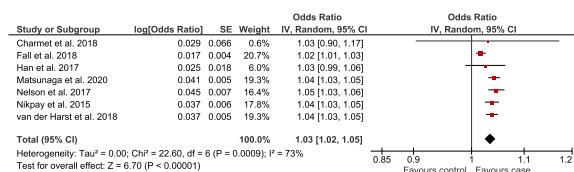

rs17087335

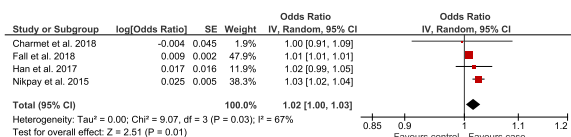

rs17114036

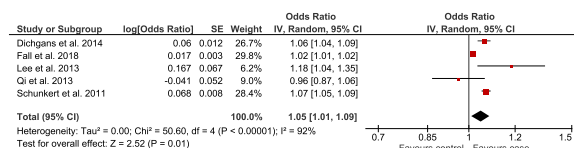

## rs17228212

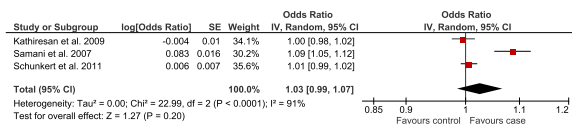

## rs17411031

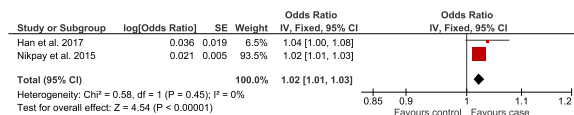

## rs1746048

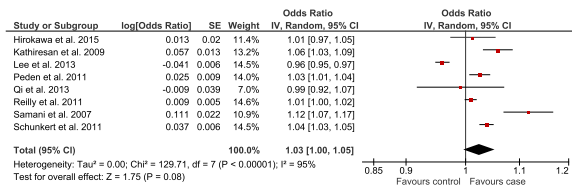

## rs1746049

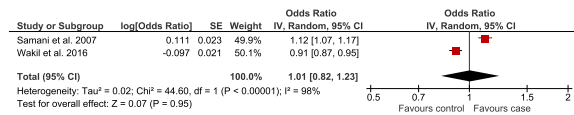

## rs17464857

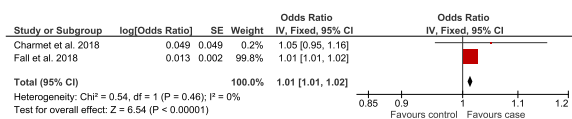

## rs17465637

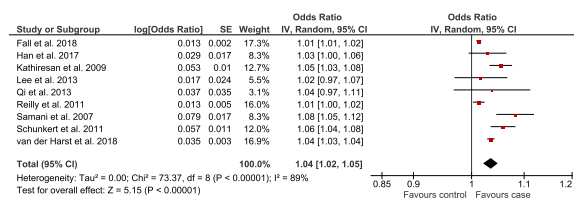

## rs17514846

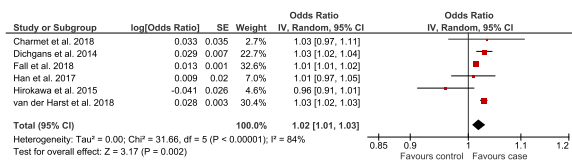

## rs17517928

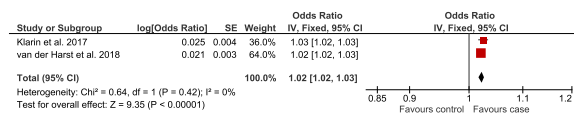

## rs17581137

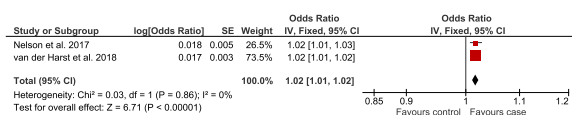

## rs17608766

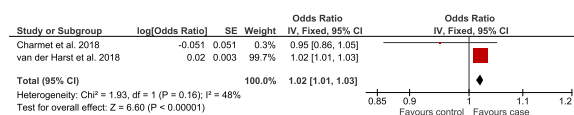

## rs17609940

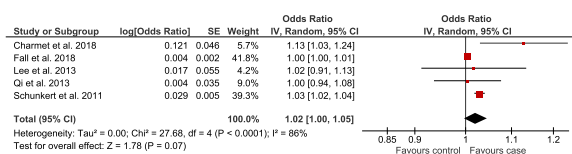

## rs17672135

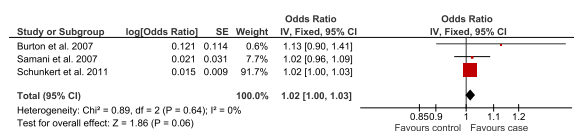

## rs17678683

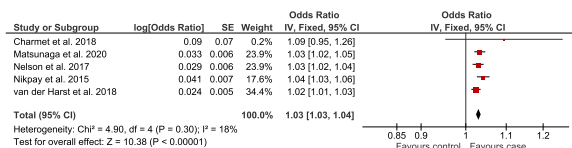

## rs17843797

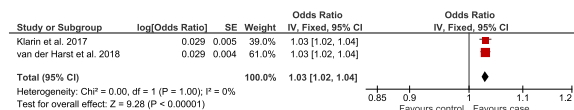

## rs1800449

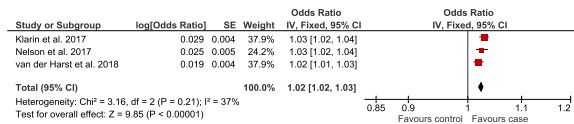

## rs1801251

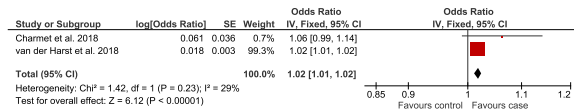

## rs1831733

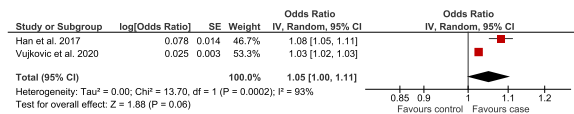

## rs186696265

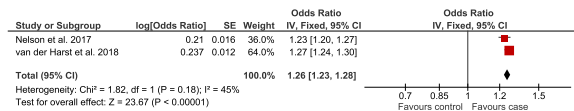

## rs1870634

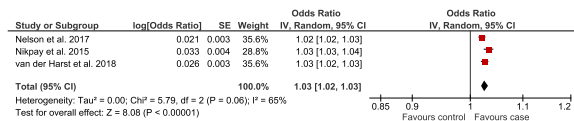

## rs188378669

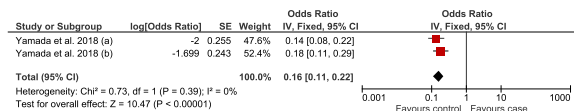

## rs1892094

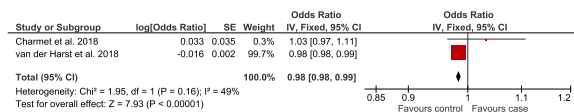

## rs1924981

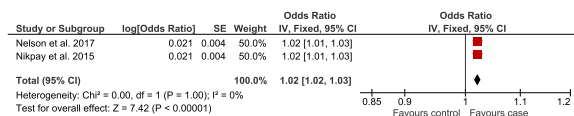

## rs1964272

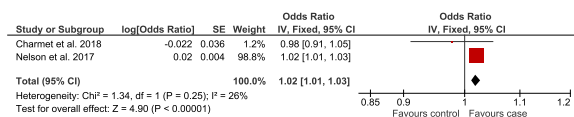

## rs1800775

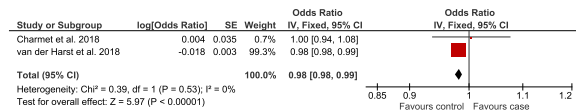

## rs180803

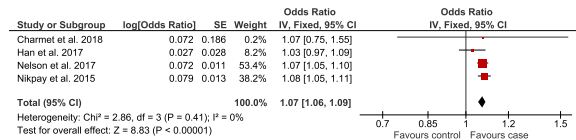

## rs1842896

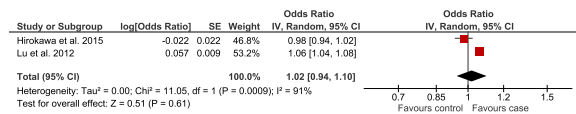

## rs1867624

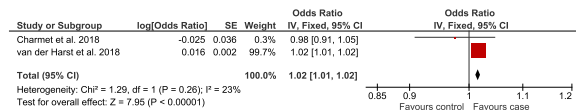

## rs1878406

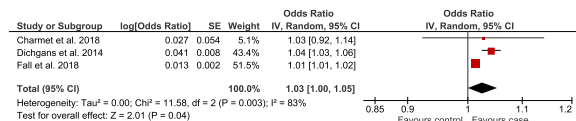

## rs1883838

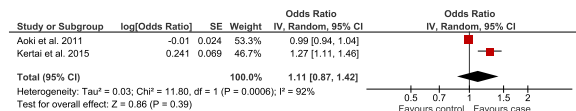

## rs192210727

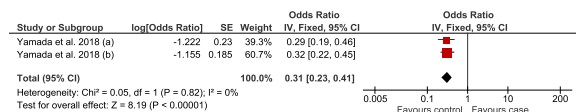

## rs194937

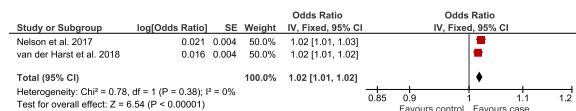

## rs1994016

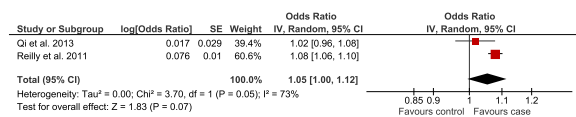

rs199921354

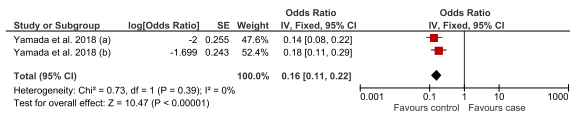

rs2000999

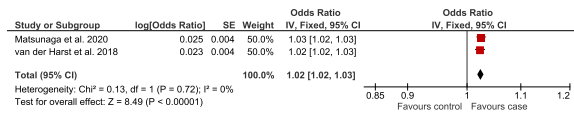

rs200787930

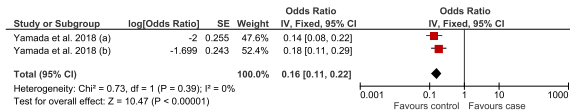

rs2011559

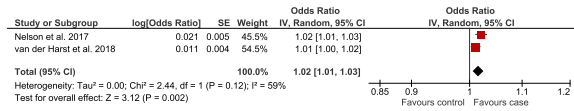

rs2023938

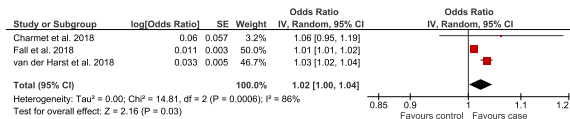

rs2047009

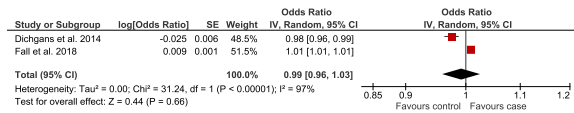

rs2048327

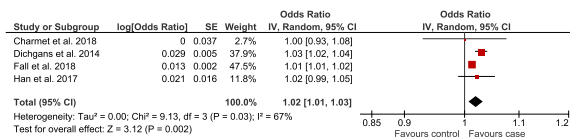

rs2072134

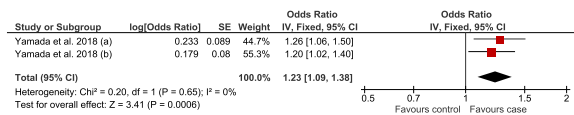

rs2074356

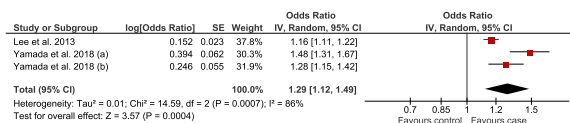

rs2075650

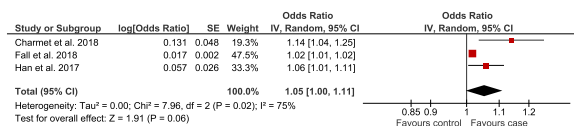

rs2107595

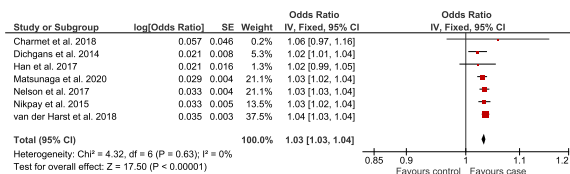

rs2128739

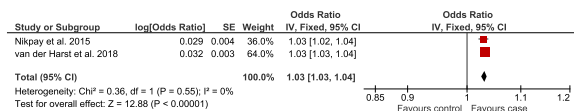

rs2153219

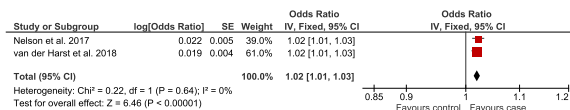

rs216172

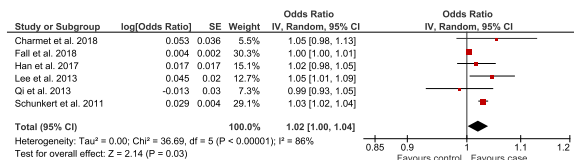

rs220702

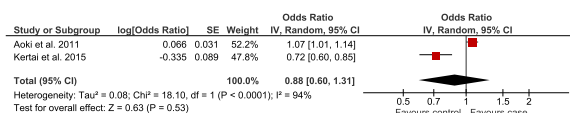

rs2241714

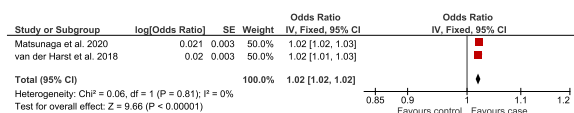

rs2244608

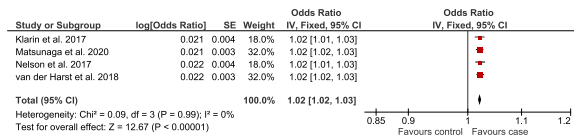

rs2246833

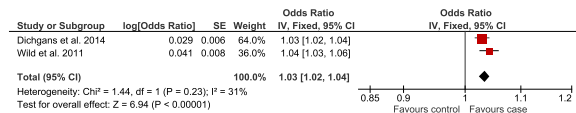

rs2246942

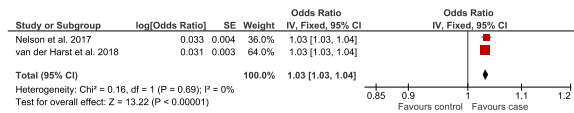

rs2252641

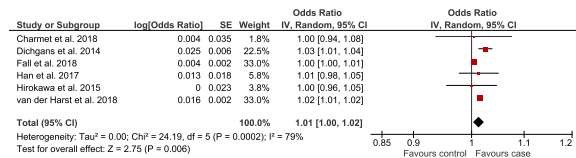

rs2257129

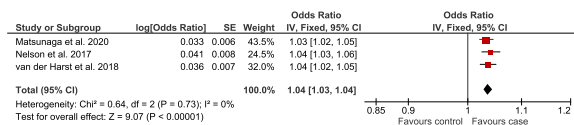

rs2259816

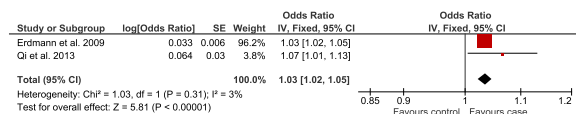

rs2306374

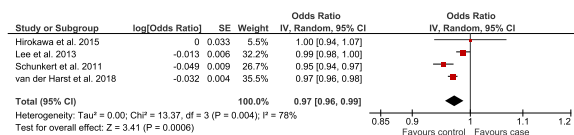

rs2315065

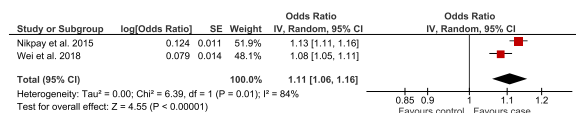

rs2327429

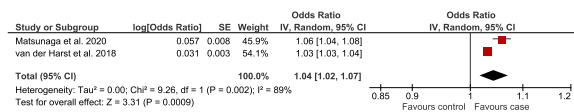

rs2383206

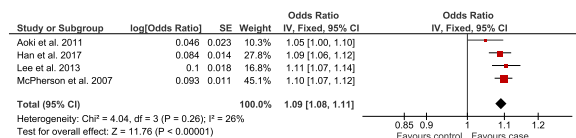

rs2383207

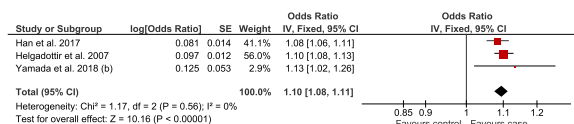

rs246600

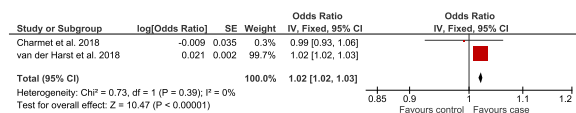

rs2487928

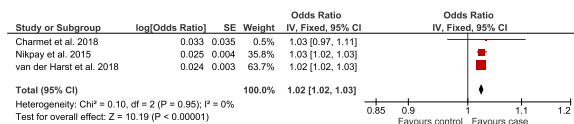

rs2505083

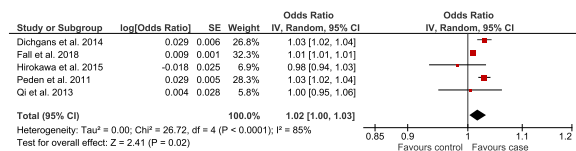

rs2519093

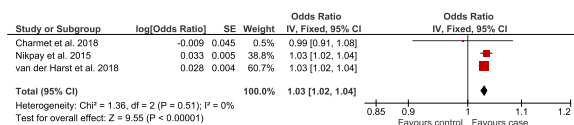

rs2523644

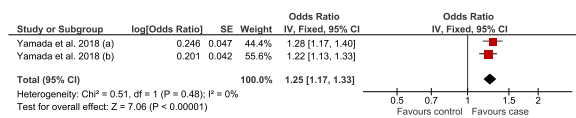

rs2571445

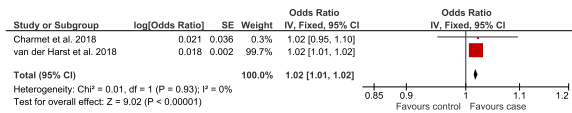

rs2596548

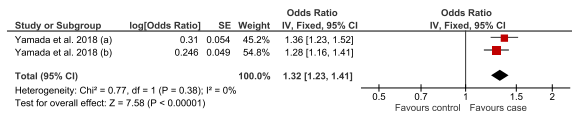

rs2616407

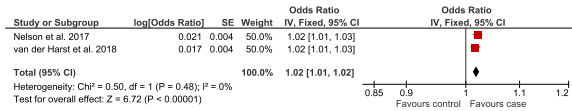

rs264

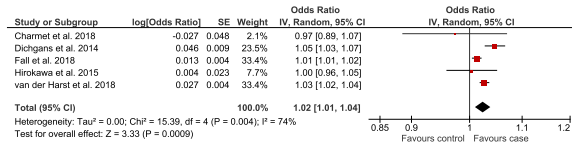

rs2681472

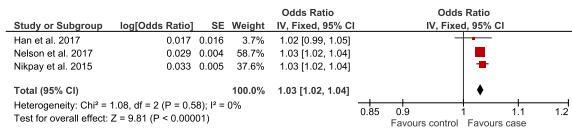

rs2727020

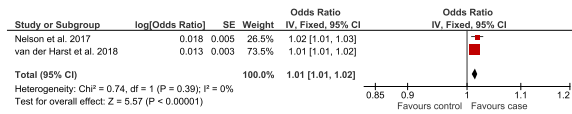

rs273909

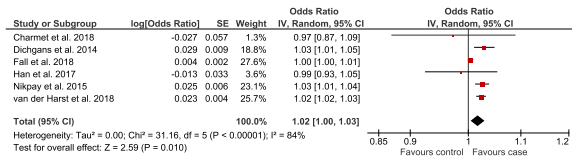

rs2789422

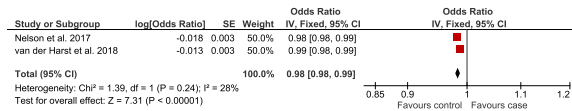

rs2820315

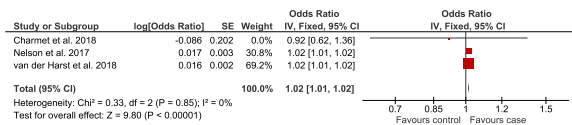

rs2843152

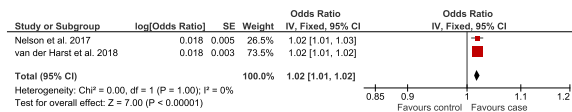

rs28451064

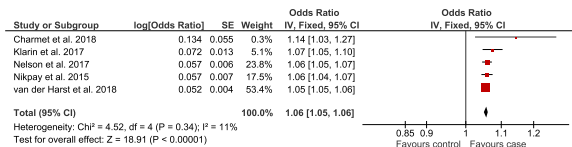

rs2880099

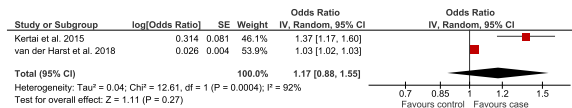

rs288187

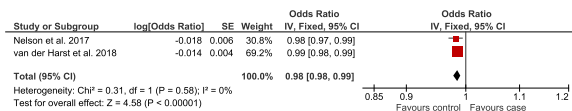

rs2891168

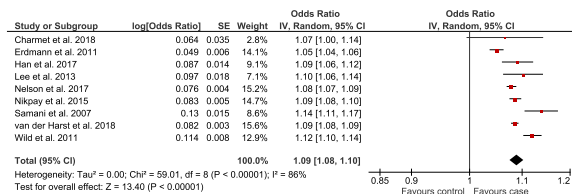

rs2895811

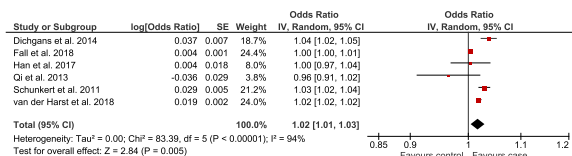

rs2943634

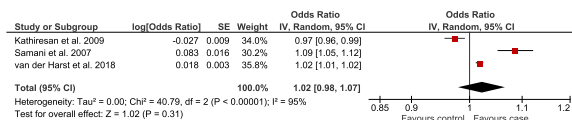



rs2954029

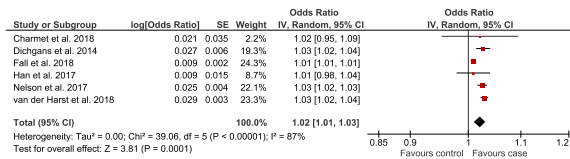

rs2972146

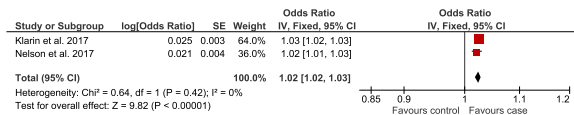

rs3130683

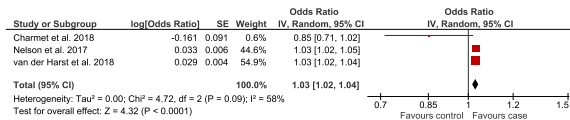

rs3133293

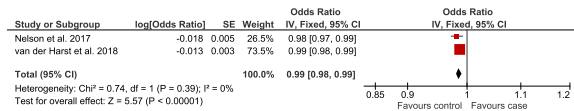

rs3184504

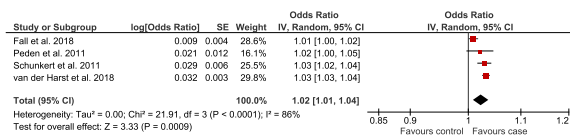

rs3217992

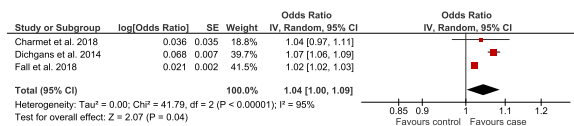

rs328

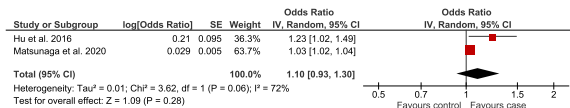

rs35146811

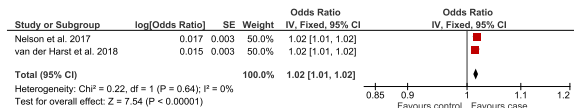

rs35465346

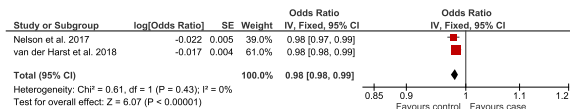

rs35489971

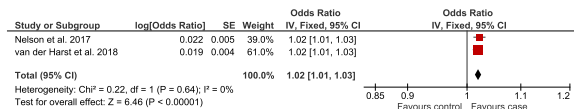

rs35895680

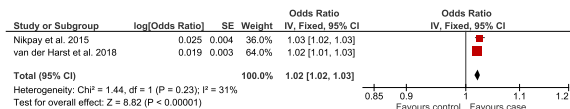

rs3739998

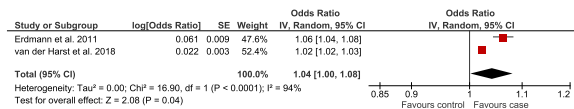

rs3782774

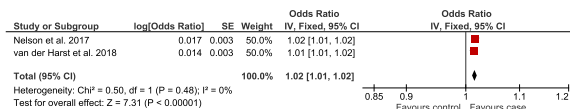

rs3782886

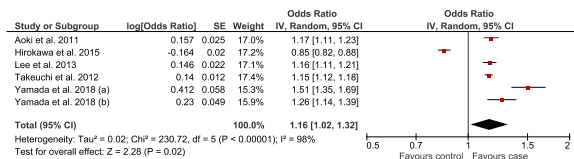

rs3798220

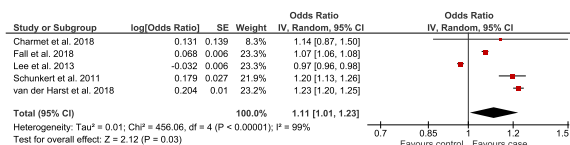

rs3809346

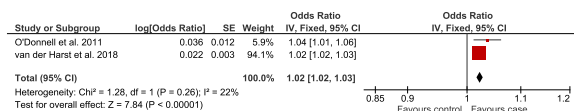

## rs3825807

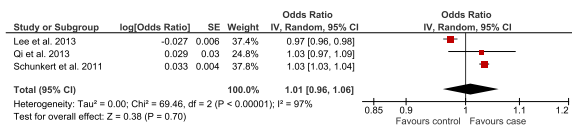

## rs383830

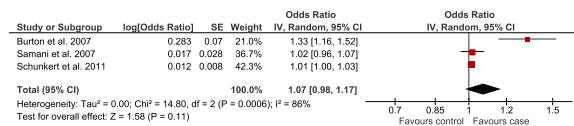

## rs3918226

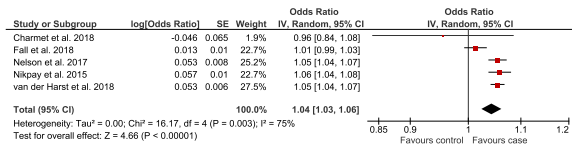

## rs3993105

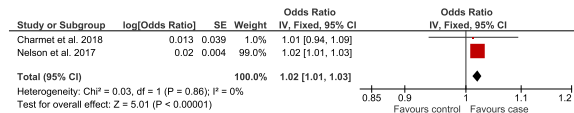

## rs41272114

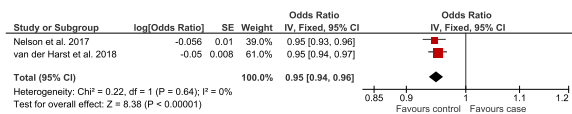

## rs421329

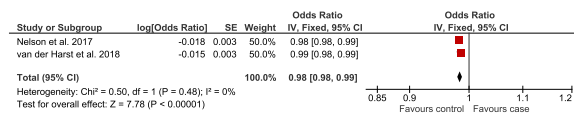

## rs4244285

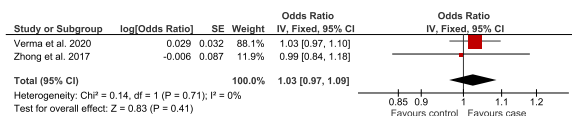

## rs425105

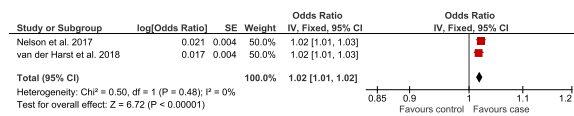

## rs4252120

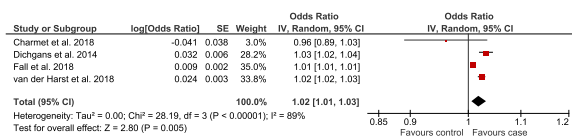

## rs4252185

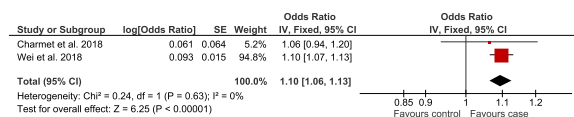

## rs4299376

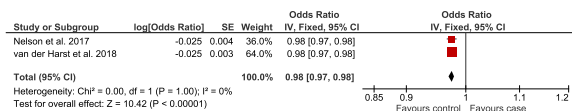

## rs4380028

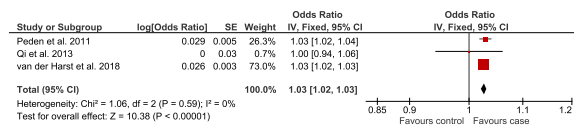

## rs4420638

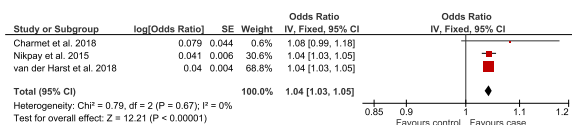

## rs445925

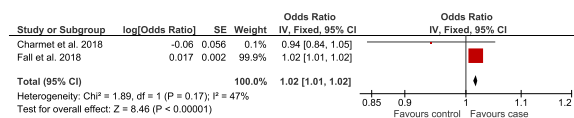

## rs46522

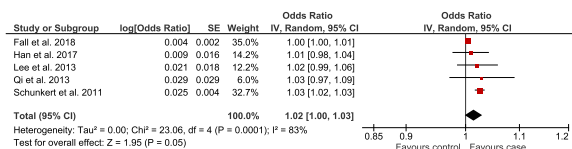

## rs4773141

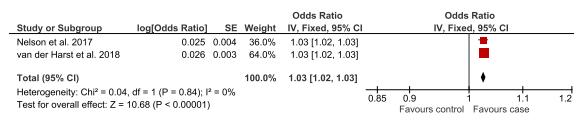

rs4773144

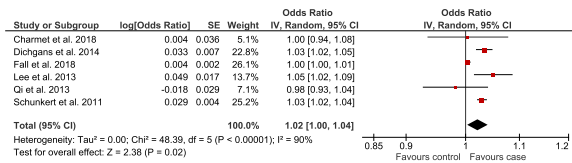

rs4845625

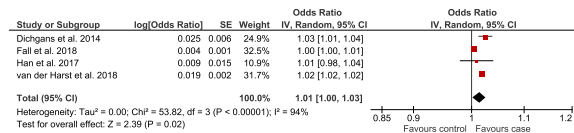

rs4977574

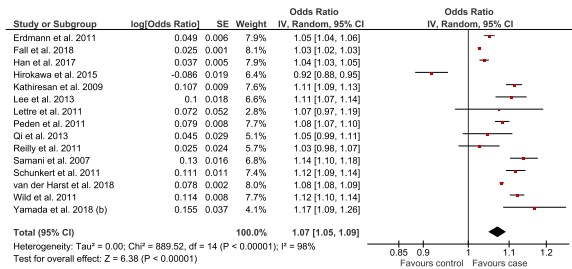

rs501120

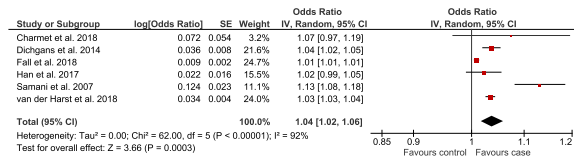

rs507666

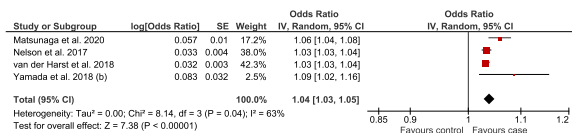

rs514659

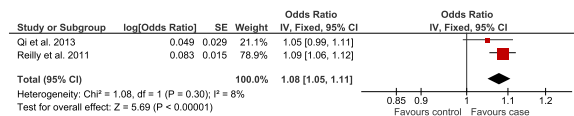

rs515135

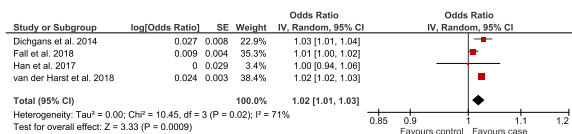

rs518394

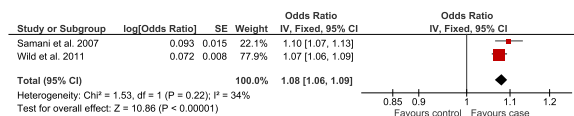

rs523096

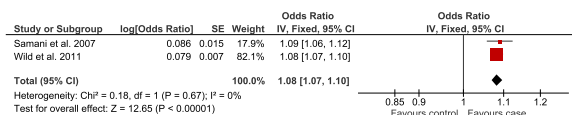

rs55730499

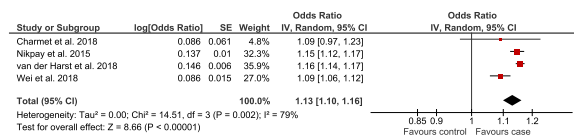

rs55940034

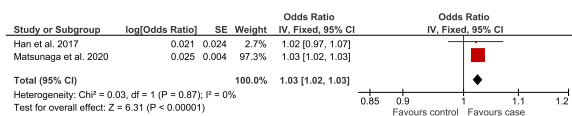

rs56062135

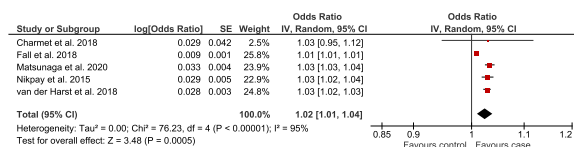

rs56131196

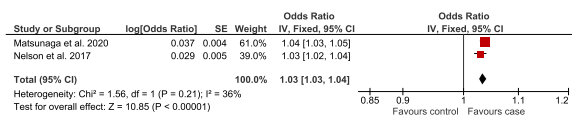

rs56210063

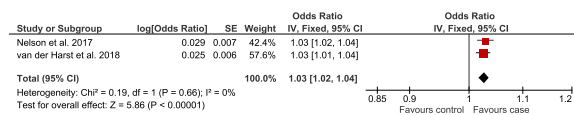

rs56289821

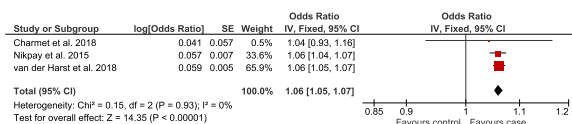

rs56313611

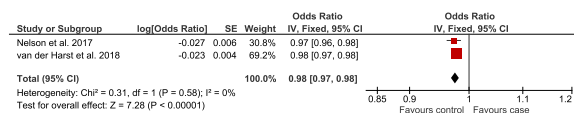

rs56336142

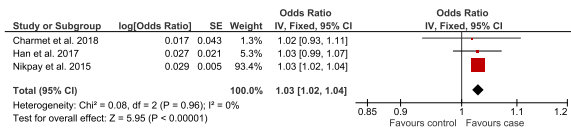

rs56393506

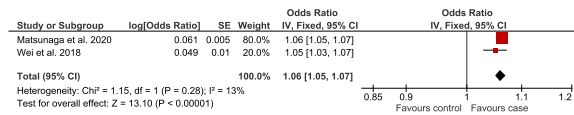

rs564398

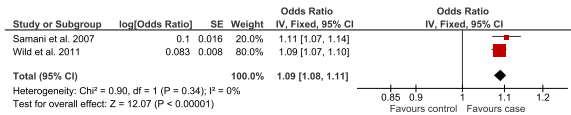

rs571353

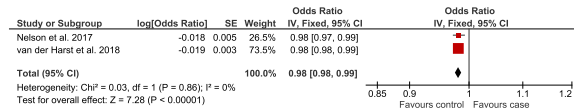

rs579459

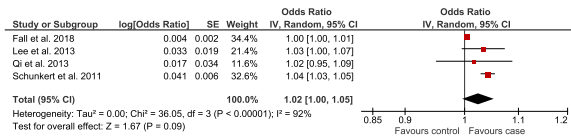

rs590121

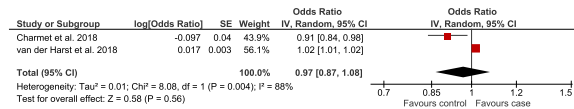

rs59898454

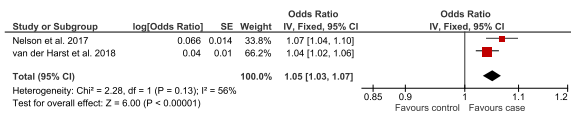

rs599839

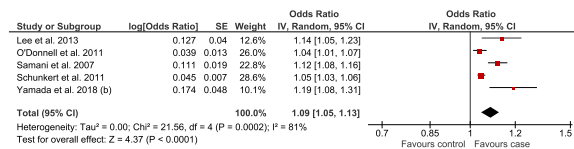

rs602633

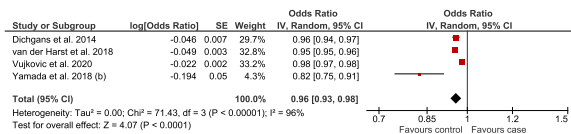

rs6129767

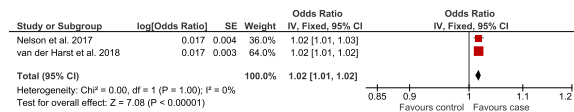

rs61734696

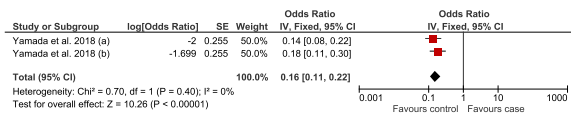

rs62076439

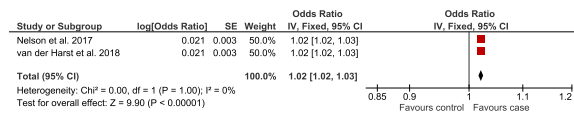

rs62253653

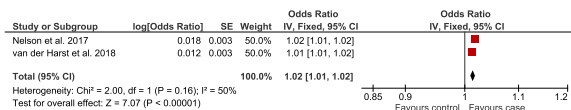

rs629301

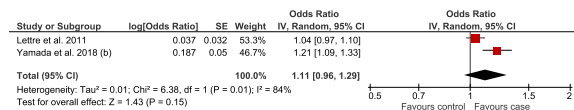

rs634552

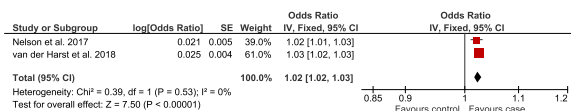

rs643319

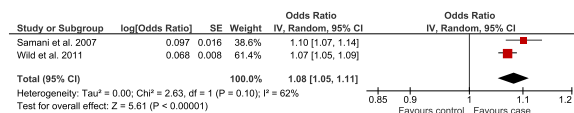

rs643434

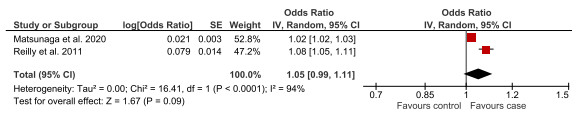

rs646776

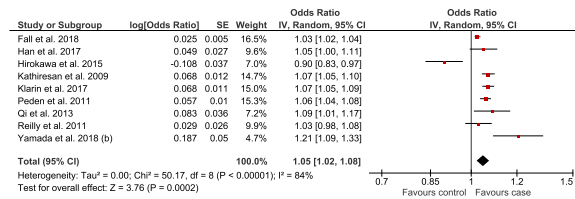

rs6475606

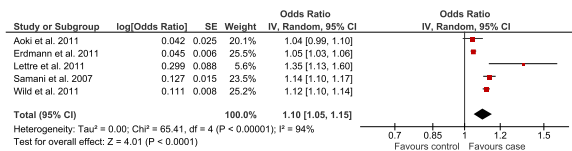

rs6494488

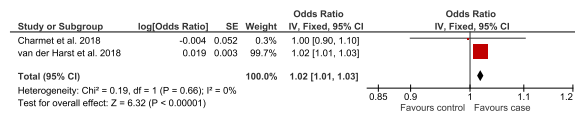

rs6504218

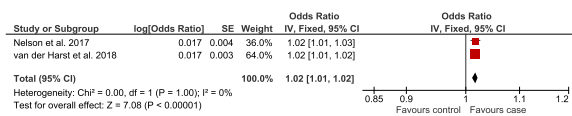

rs6511720

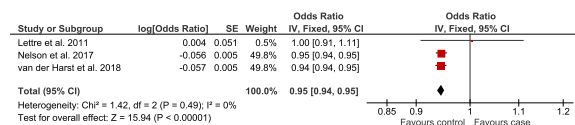

rs6538176

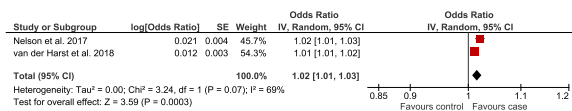

rs6544713

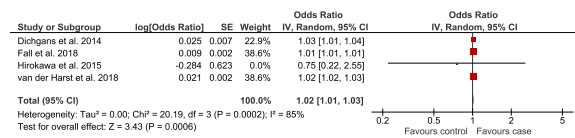

rs657152

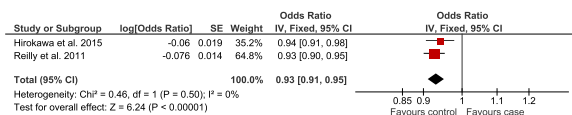

rs663129

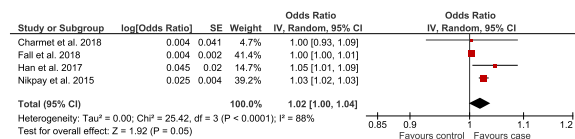

rs6689306

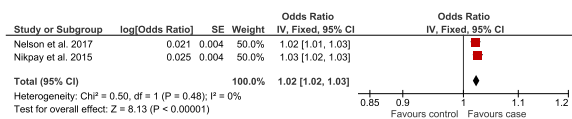

rs6700559

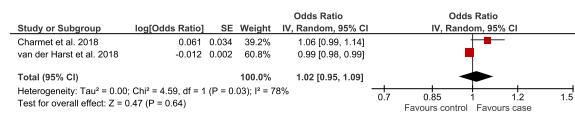

rs671

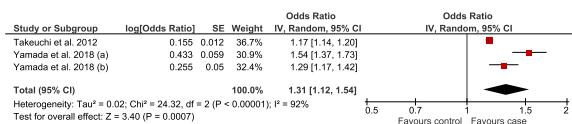

rs67180937

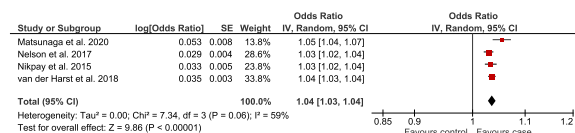

rs6725887

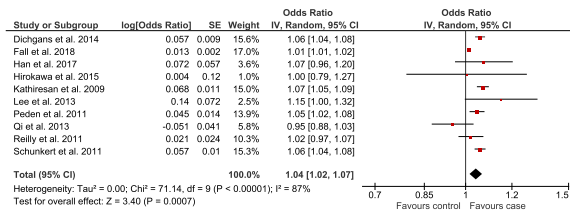

rs68170813

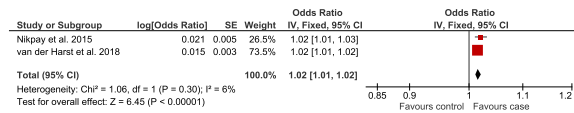

rs6841581

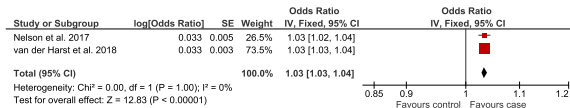

rs6842241

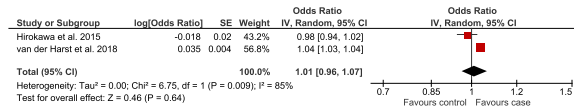

rs688034

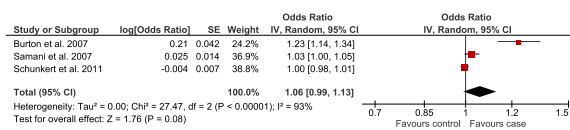

rs6903956

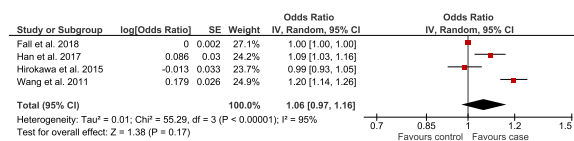

rs6905288

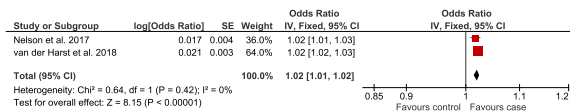

rs6909752

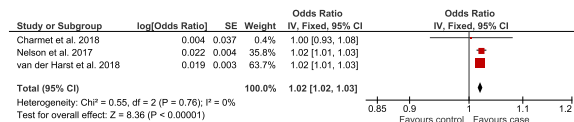

rs6922269

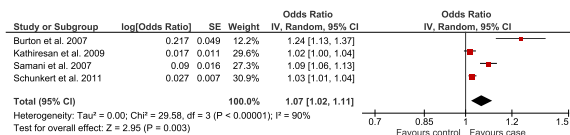

rs7044859

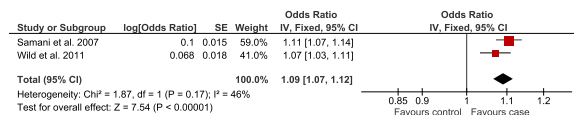

rs7136259

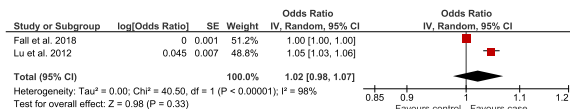

rs7173743

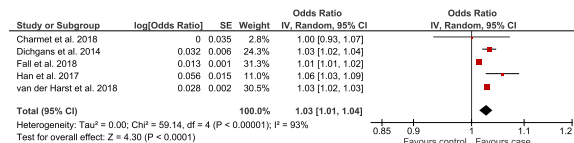

rs7212798

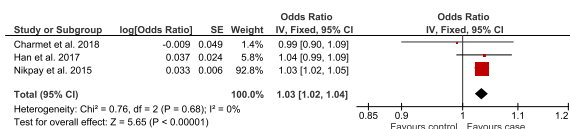

rs7214245

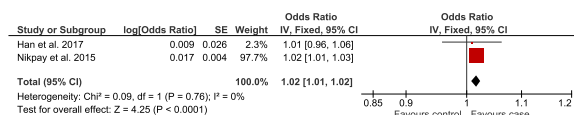

rs7250581

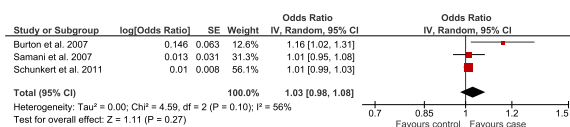

rs72689147

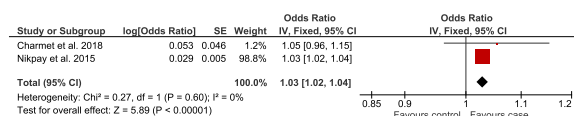

rs72743461

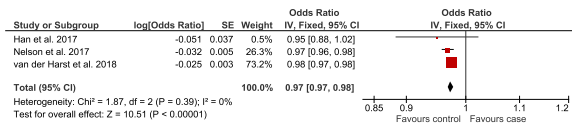

rs73045269

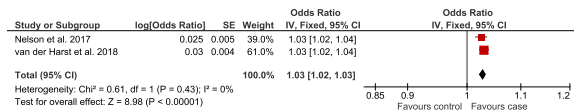

rs7412

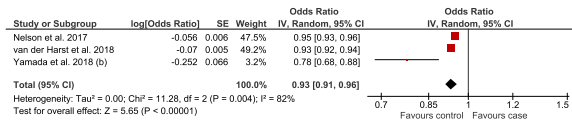

rs742115

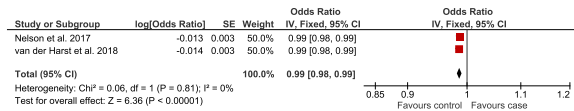

rs74416240

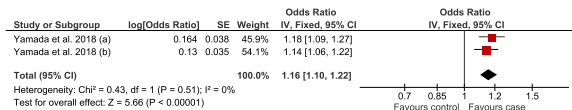

rs74617384

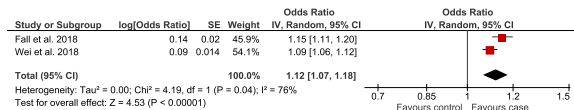

rs748431

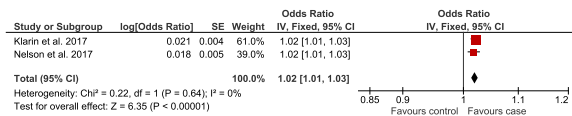

rs7500448

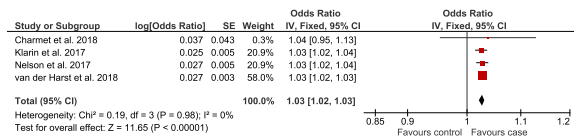

rs7528419

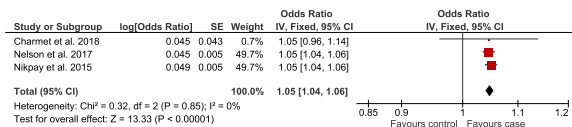

rs7538207

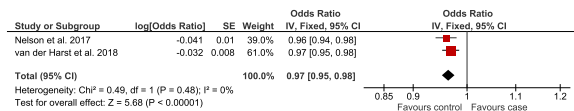

rs7568458

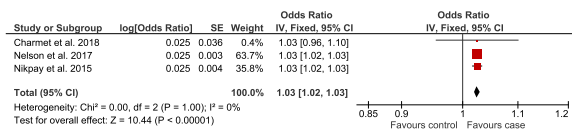

rs7623687

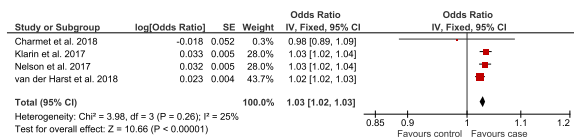

rs7678555

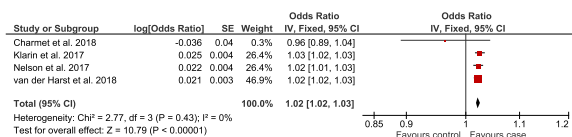

rs7692387

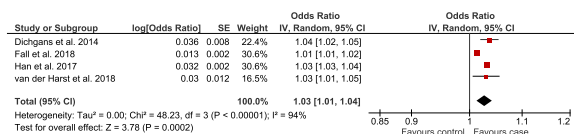

rs781622

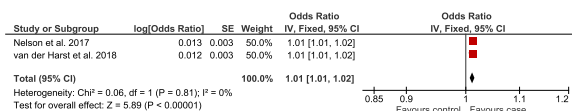

rs7865618

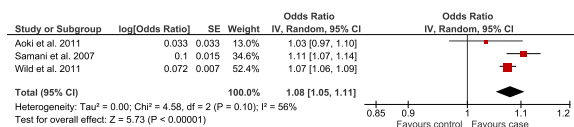

rs7969300

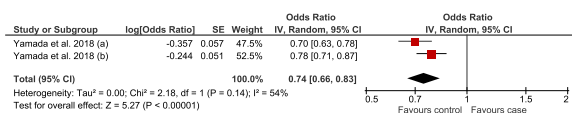

rs79716828

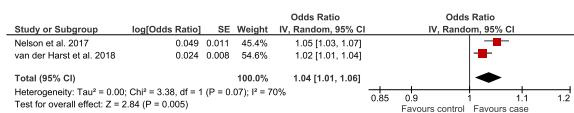



rs8042271

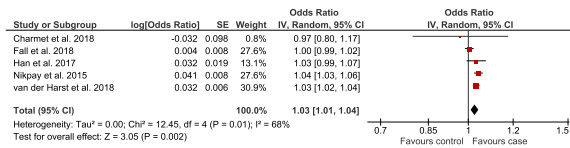

rs8055236

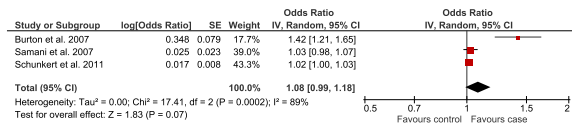

rs8108632

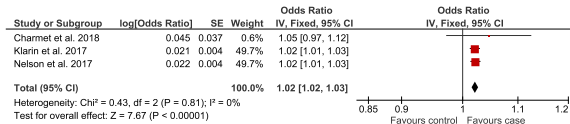

rs833509

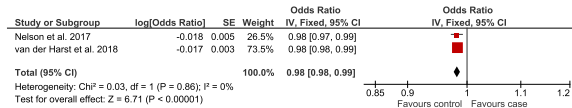

rs867186

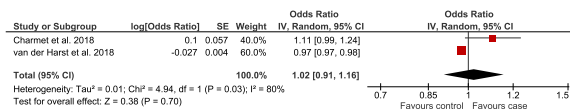

rs886126

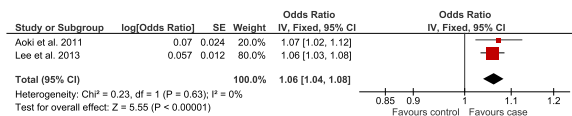

rs916524

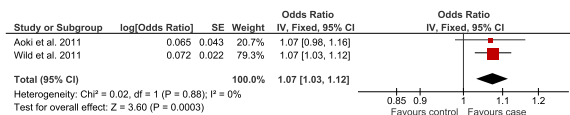

rs918949

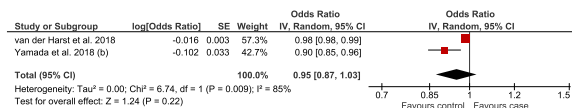

rs925368

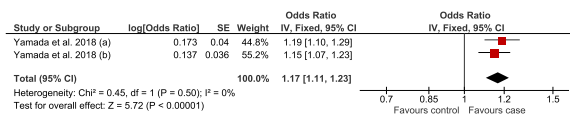

rs9319428

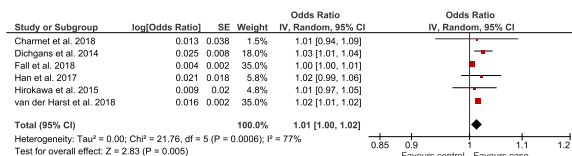

rs9349379

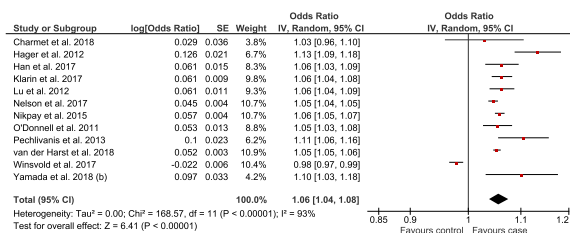

rs9369640

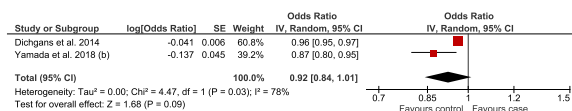

rs944797

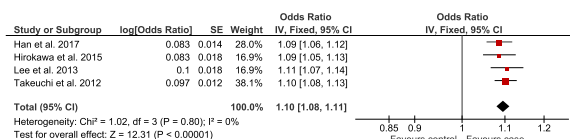

rs9501744

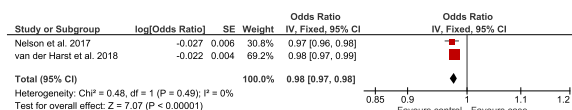

rs9515203

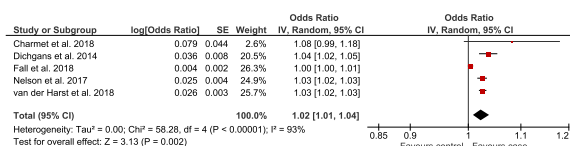

rs9591012

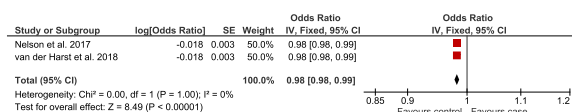

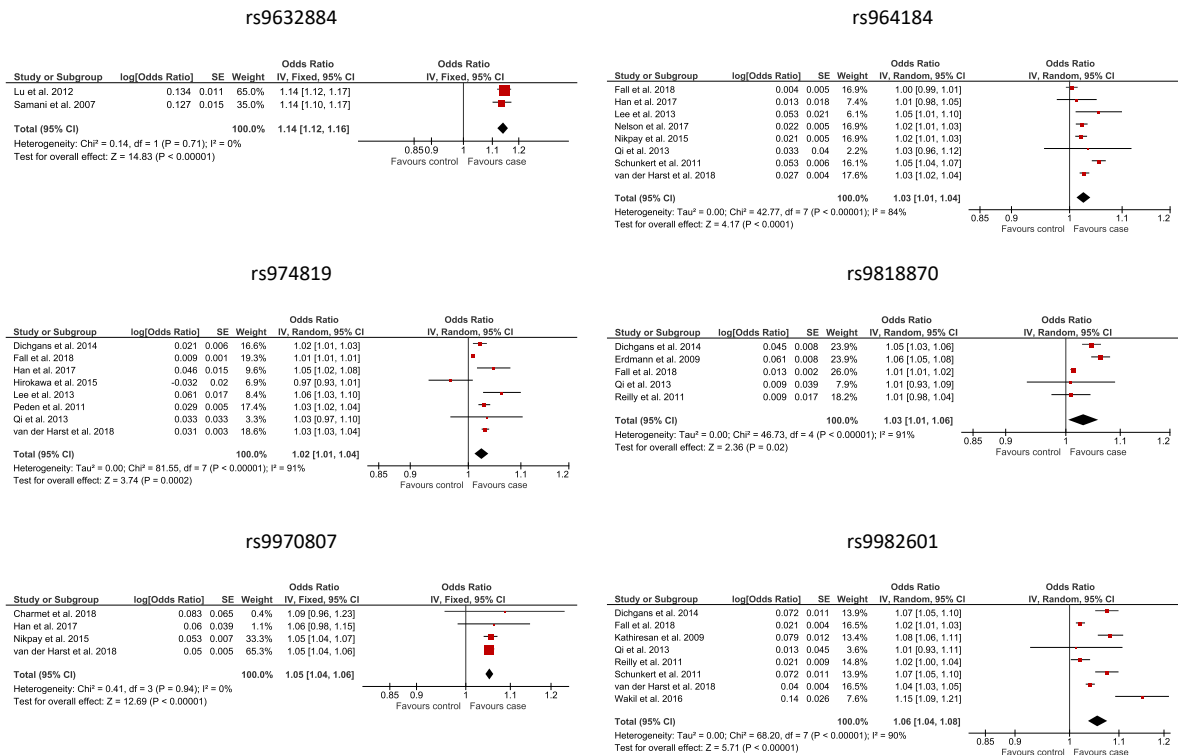

**Figure S1.** Forest plots for all single nucleotide polymorphisms from 44 GWAS publications included in this paper except for rs4593108.
