# Supplementary material for: Genetic Factors for Coronary Heart Disease and Their Mechanisms: A Meta-Analysis and Comprehensive Review of Common Variants from Genome-Wide Association Studies
Source: Diagnostics (Basel). 2022 Oct 21;12(10):2561. doi: 10.3390/diagnostics12102561 (PMC9601486; doi:10.3390/diagnostics12102561)
Supplement: Supplementary file 1 [file diagnostics-12-02561-s001.zip › Table S1-S4.xlsx]

## Sheet: Index
Table	Description
Table S1	Recurring single nucleotide polymorphisms (SNPs) from the 44 included articles
Table S2	Meta-analysis results of the recurring SNPs
Table S3	Significant meta-analyzed SNPs and their corresponding gene(s)
Table S4	Results of significant pathways in the Pathway Enrichment Analysis using g:Profiler

## Sheet: Table S1
*List of references can be found in the main manuscript.
Title	Author Year	Notes	Outcome	SNP	EA	Nearest Gene(s)	OR	Lower	Upper	P-value
Novel risk genes identified in a genome-wide association study for coronary artery disease in patients with type 1 diabetes	Charmet et al. (2018) [30]	Discovery stage only	CAD in T1DM	rs10139550	G	HHIPL1	0.96	0.819	1.145	0.645
Association analyses based on false discovery rate implicate new loci for coronary artery disease.	Nelson et al. (2017) [46]		CAD	rs10139550	G	HHIPL1	1.05	1.04	1.07	1.79e-09
A comprehensive 1,000 Genomes-based genome-wide association meta-analysis of coronary artery disease	Nikpay et al. (2015) [5]		CAD	rs10139550	G	HHIPL1	1.06	1.04	1.08	1.38e-08
Association analyses based on false discovery rate implicate new loci for coronary artery disease.	Nelson et al. (2017) [46]		CAD	rs10168194	C	SPHKAP	1.04	1.02	1.06	4.07e-06
Identification of 64 Novel Genetic Loci Provides an Expanded View on the Genetic Architecture of Coronary Artery Disease	van der Harst and Verweij (2018) [15]		CAD	rs10168194	C	SPHKAP(0)	1.0287	1.01528	1.0423	2.133e-05
Novel risk genes identified in a genome-wide association study for coronary artery disease in patients with type 1 diabetes	Charmet et al. (2018) [30]	Discovery stage only	CAD in T1DM	rs10237377	T	PARP12	0.91	0.766	1.084	0.148
Identification of 64 Novel Genetic Loci Provides an Expanded View on the Genetic Architecture of Coronary Artery Disease	van der Harst and Verweij (2018) [15]		CAD	rs10237377	T	PARP12(0)	0.966765	0.955837	0.977818	6.531e-09
Association analyses based on false discovery rate implicate new loci for coronary artery disease.	Nelson et al. (2017) [46]		CAD	rs10455872	G	LPA	1.31	1.27	1.36	2.25e-48
LPA Variants are Associated with Residual Cardiovascular Risk in Patients Receiving Statins	Wei et al. (2018) [59]	Validation stage only	CHD during statin therapy	rs10455872	G	LPA	1.71	1.14	2.57	0.0093
LPA Variants are Associated with Residual Cardiovascular Risk in Patients Receiving Statins	Wei et al. (2018) [59]	Discovery stage only	CHD during statin therapy	rs10455872	G	LPA	1.58	1.35	1.86	2.6e-10
Novel risk genes identified in a genome-wide association study for coronary artery disease in patients with type 1 diabetes	Charmet et al. (2018) [30]	Discovery stage only	CAD in T1DM	rs1050362	A	DHX38	1.11	0.939	1.313	0.11
Identification of 64 Novel Genetic Loci Provides an Expanded View on the Genetic Architecture of Coronary Artery Disease	van der Harst and Verweij (2018) [15]		CAD	rs1050362	A	DHX38(0)|TXNL4B(+2.6kb)	1.03583	1.02512	1.04664	2.92e-11
Genome-wide association study identifies a missense variant at APOA5 for coronary artery disease in Multi-Ethnic Cohorts from Southeast Asia	Han et al. (2017) [36]	Discovery stage only	CAD	rs10738607	G	CDKN2B-AS1	1.207	1.1286	1.2854	2.73e-06
A genome-wide association study reveals susceptibility loci for myocardial infarction/coronary artery disease in Saudi Arabs	Wakil et al. (2016) [57]		CAD	rs10738607	G	CDKN2A/B	0.78	0.71	0.85	2.17e-08
Genome-wide association study identifies a missense variant at APOA5 for coronary artery disease in Multi-Ethnic Cohorts from Southeast Asia	Han et al. (2017) [36]	Discovery stage only	CAD	rs10738609	G	CDKN2B-AS1	1.226	1.15152	1.30048	8.46e-08
A genome-wide association study of a coronary artery disease risk variant	Lee et al. (2013) [42]		CAD	rs10738609	G		1.25	1.16	1.36	3.98e-08
SNPs on chromosome 5p15.3 associated with myocardial infarction in Japanese population	Aoki et al. (2011) [14]	Stage 2 only	MI	rs10746041	C		0.888114	0.79824	0.988107	0.03
Genome-wide association study of perioperative myocardial infarction after coronary artery bypass surgery	Kertai et al. (2015) [40]		Peri-op MI after CABG	rs10746041	C	C12orf75-NUAK1	0.584454	0.426076	0.801282	0.0008554
Genomewide association analysis of coronary artery disease	Samani et al. (2007) [51]	WTCC & German MI Family Study	CAD+MI	rs10757264	G		1.23	1.15	1.32	3.02e-09
A genome-wide association study identifies LIPA as a susceptibility gene for coronary artery disease	Wild et al. (2011) [60]	GWAS & Replication 1	CAD	rs10757264	G	MTAP	1.18	1.14	1.23	1.82e-19
Genome-wide association study identifies a missense variant at APOA5 for coronary artery disease in Multi-Ethnic Cohorts from Southeast Asia	Han et al. (2017) [36]	Discovery stage only	CAD	rs10757270	G	CDKN2B-AS1	1.196	1.12152	1.27048	2.49e-06
A genome-wide association study identifies LIPA as a susceptibility gene for coronary artery disease	Wild et al. (2011) [60]	GWAS & Replication 1	CAD	rs10757270	G	intergenic	1.23	1.17	1.3	2.3e-13
SNPs on chromosome 5p15.3 associated with myocardial infarction in Japanese population	Aoki et al. (2011) [14]	Stage 2 only	MI	rs10757272	T		1.13681	1.01738	1.27024	0.024
Genome-wide association study of coronary artery calcification in asymptomatic Korean populations	Choi et al. (2019) [31]	Other variants not reported	CAC	rs10757272	T	CDKN2B-AS1	3.24	2.11	4.97	7.55e-08
Genome-wide association study identifies a missense variant at APOA5 for coronary artery disease in Multi-Ethnic Cohorts from Southeast Asia	Han et al. (2017) [36]	Discovery stage only	CAD	rs10757272	T	CDKN2B-AS1	1.202	1.1236	1.2804	4.49e-06
A genome-wide association study of a coronary artery disease risk variant	Lee et al. (2013) [42]		CAD	rs10757272	T	CDKN2BAS	1.28205	1.17647	1.38889	7.02e-09
A genome-wide association study identifies LIPA as a susceptibility gene for coronary artery disease	Wild et al. (2011) [60]	GWAS & Replication 1	CAD	rs10757272	T	intergenic	1.29	1.25	1.34	1.68e-43
Genome-wide association study identifies a missense variant at APOA5 for coronary artery disease in Multi-Ethnic Cohorts from Southeast Asia	Han et al. (2017) [36]	Discovery stage only	CAD	rs10757274	G	CDKN2B-AS1	1.22	1.14552	1.29448	1.89e-07
Genome-wide association study in Han Chinese identifies four new susceptibility loci for coronary artery disease	Lu et al. (2012) [44]	Discovery & replications 1,2	CAD	rs10757274	G	CDKN2A/B	1.37	1.31	1.43	7.56e-45
Transethnic Meta-analysis of Genome-wide Association Studies Identifies Three New Loci and Characterizes Population-specific Differences for Coronary Artery Disease	Matsunaga et al. (2020) [16]	Japanese GWAS only	CAD	rs10757274	G	CDKN2B-AS1	1.22	1.18	1.27	6.33e-27
A common allele on chromosome 9 associated with coronary heart disease	McPherson et al. (2007) [45]		CAD	rs10757274	G		1.2737	1.2135	1.3368	0.0001
A genome-wide association study reveals susceptibility loci for myocardial infarction/coronary artery disease in Saudi Arabs	Wakil et al. (2016) [57]		MI	rs10757274	G	CDKN2A/B	0.79	0.73	0.86	2.98e-08
Genome-wide association study identifies a missense variant at APOA5 for coronary artery disease in Multi-Ethnic Cohorts from Southeast Asia	Han et al. (2017) [36]	Discovery stage only	CAD	rs10757275	A	CDKN2B-AS1	1.218	1.14352	1.29248	2.31e-07
A genome-wide association study of a coronary artery disease risk variant	Lee et al. (2013) [42]		CAD	rs10757275	A		1.26	1.17	1.37	1.08e-08
A common variant on chromosome 9p21 affects the risk of myocardial infarction	Helgadottir et al. (2007) [37]		CAD excluding MI	rs10757278	G	CDKN2A/2B	1.24	1.13	1.37	1.1e-05
A common variant on chromosome 9p21 affects the risk of myocardial infarction	Helgadottir et al. (2007) [37]		MI	rs10757278	G	CDKN2A/2B	1.28	1.22	1.35	1.2e-20
A genome-wide association study of a coronary artery disease risk variant	Lee et al. (2013) [42]		CAD	rs10757278	G		1.29	1.19	1.4	8.73e-10
Identification of 26 novel loci that confer susceptibility to early-onset coronary artery disease in a Japanese population	Yamada et al. (2018b) [63]		Early-onset CAD	rs10757278	G	-	0.77	0.65	0.91	0.0023
Identification of 13 novel susceptibility loci for early-onset myocardial infarction, hypertension, or chronic kidney disease	Yamada et al. (2018a) [62]		MI	rs10774610	C	CCDC63	1.68	1.24	2.29	0.0009
Identification of 26 novel loci that confer susceptibility to early-onset coronary artery disease in a Japanese population	Yamada et al. (2018b) [63]		Early-onset CAD	rs10774610	C	CCDC63	1.38	1.05	1.82	0.0214
Genome-wide association study of coronary artery disease among individuals with diabetes: the UK Biobank	Fall et al. (2018) [18]	CAD+DM vs DM	CAD	rs10840293	A	SWAP70	0.98	0.93	1.03
Genome-wide association study of coronary artery disease among individuals with diabetes: the UK Biobank	Fall et al. (2018) [18]	CAD+DM vs non-DM	CAD	rs10840293	A	SWAP70	1.05	1.03	1.07
Association analyses based on false discovery rate implicate new loci for coronary artery disease.	Nelson et al. (2017) [46]		CAD	rs10840293	A	SWAP70	1.05	1.03	1.07	6.71e-09
A comprehensive 1,000 Genomes-based genome-wide association meta-analysis of coronary artery disease	Nikpay et al. (2015) [5]		CAD	rs10840293	A	SWAP70	1.06	1.04	1.08	1.28e-08
Identification of 64 Novel Genetic Loci Provides an Expanded View on the Genetic Architecture of Coronary Artery Disease	van der Harst and Verweij (2018) [15]		CAD	rs10840293	A	SWAP70(0)	1.04707	1.03402	1.06029	8.953e-13
Genetic analysis in UK Biobank links insulin resistance and transendothelial migration pathways to coronary artery disease	Klarin et al. (2017) [41]	UK Biobank & Stage 3	CAD	rs10841443	G	RP11-664H17.1	1.05	1.03	1.07	2.23e-08
Transethnic Meta-analysis of Genome-wide Association Studies Identifies Three New Loci and Characterizes Population-specific Differences for Coronary Artery Disease	Matsunaga et al. (2020) [16]	Japanese GWAS, UK Biobank & CARDIoGRAMplusC4D	CAD	rs10841443	G	LINC02398	1.05	1.03	1.06	1.28e-08
Identification of 64 Novel Genetic Loci Provides an Expanded View on the Genetic Architecture of Coronary Artery Disease	van der Harst and Verweij (2018) [15]		CAD	rs10841443	G	LOC100506393(0)	1.05232	1.03839	1.06644	7.886e-14
Identification of 13 novel susceptibility loci for early-onset myocardial infarction, hypertension, or chronic kidney disease	Yamada et al. (2018a) [62]		MI	rs10849915	C	CCDC63	1.63	1.19	2.22	0.0021
Identification of 26 novel loci that confer susceptibility to early-onset coronary artery disease in a Japanese population	Yamada et al. (2018b) [63]		Early-onset CAD	rs10849915	C	CCDC63	1.33	1.01	1.76	0.0458
Novel risk genes identified in a genome-wide association study for coronary artery disease in patients with type 1 diabetes	Charmet et al. (2018) [30]	Discovery stage only	CAD in T1DM	rs10857147	T	FGF5	1.02	0.855	1.215	0.417
Genetic analysis in UK Biobank links insulin resistance and transendothelial migration pathways to coronary artery disease	Klarin et al. (2017) [41]	UK Biobank & Stage 3	CAD	rs10857147	T	FGF5 (regulatory region)	1.06	1.04	1.08	3.39e-08
Association analyses based on false discovery rate implicate new loci for coronary artery disease.	Nelson et al. (2017) [46]		CAD	rs10857147	T	FGF5	1.06	1.04	1.08	8.73e-09
Identification of 64 Novel Genetic Loci Provides an Expanded View on the Genetic Architecture of Coronary Artery Disease	van der Harst and Verweij (2018) [15]		CAD	rs10857147	T	FGF5(-6.669kb)	1.05033	1.03723	1.06358	1.369e-14
Association analyses based on false discovery rate implicate new loci for coronary artery disease.	Nelson et al. (2017) [46]		CAD	rs1088868	G	OGDH	1.04	1.02	1.06	3.26e-05
Identification of 64 Novel Genetic Loci Provides an Expanded View on the Genetic Architecture of Coronary Artery Disease	van der Harst and Verweij (2018) [15]		CAD	rs1088868	G	.	1.01532	1.00109	1.02975	0.03617
A genome-wide association study identifies PLCL2 and AP3D1-DOT1L-SF3A2 as new susceptibility loci for myocardial infarction in Japanese	Hirokawa et al. (2015) [19]		MI	rs10947262	T	C6orf10-BTNL2	1.17	1.07	1.27	0.000884
Identification of 26 novel loci that confer susceptibility to early-onset coronary artery disease in a Japanese population	Yamada et al. (2018b) [63]		Early-onset CAD	rs10947262	T	BTNL2	1.31579	1.07527	1.6129	0.0082
Novel risk genes identified in a genome-wide association study for coronary artery disease in patients with type 1 diabetes	Charmet et al. (2018) [30]	Discovery stage only	CAD in T1DM	rs10947789	T	KCNK5	1.07	0.89	1.293	0.229
Shared genetic susceptibility to ischemic stroke and coronary artery disease: a genome-wide analysis of common variants	Dichgans et al. (2014) [32]		CAD	rs10947789	T	KCNK5	1.06383	1.03093	1.0989	0.00107
Genome-wide association study of coronary artery disease among individuals with diabetes: the UK Biobank	Fall et al. (2018) [18]	CAD+DM vs DM	CAD	rs10947789	T	KCNK5	0.99	0.93	1.05
Genome-wide association study of coronary artery disease among individuals with diabetes: the UK Biobank	Fall et al. (2018) [18]	CAD+DM vs non-DM	CAD	rs10947789	T	KCNK5	1.03	1	1.05
Identification of 64 Novel Genetic Loci Provides an Expanded View on the Genetic Architecture of Coronary Artery Disease	van der Harst and Verweij (2018) [15]		CAD	rs10947789	T	KCNK5(0)	1.04216	1.02998	1.05449	7.631e-12
Novel risk genes identified in a genome-wide association study for coronary artery disease in patients with type 1 diabetes	Charmet et al. (2018) [30]	Discovery stage only	CAD in T1DM	rs10953541	C	BCAP29	1.16	0.967	1.401	0.054
Genome-wide association study of coronary artery disease among individuals with diabetes: the UK Biobank	Fall et al. (2018) [18]	CAD+DM vs DM	CAD	rs10953541	C	7q22	1.02	0.96	1.08
Genome-wide association study of coronary artery disease among individuals with diabetes: the UK Biobank	Fall et al. (2018) [18]	CAD+DM vs non-DM	CAD	rs10953541	C	7q22	1.02	0.99	1.04
Genome-wide association study identifies a missense variant at APOA5 for coronary artery disease in Multi-Ethnic Cohorts from Southeast Asia	Han et al. (2017) [36]	Discovery & validation stages	CAD	rs10953541	C	7q22	1.08696	0.980392	1.19048	0.114
A genome-wide association study identifies PLCL2 and AP3D1-DOT1L-SF3A2 as new susceptibility loci for myocardial infarction in Japanese	Hirokawa et al. (2015) [19]		MI	rs10953541	C	7q22	1.01	0.87	1.17	0.886
A genome-wide association study of a coronary artery disease risk variant	Lee et al. (2013) [42]		CAD	rs10953541	C	7q22	0.95	1.05	1.11	0.4
A genome-wide association study in europeans and South asians identifies five new loci for coronary artery disease	Peden et al. (2011) [49]		CAD	rs10953541	C	7q22	1.08	1.05	1.11	3.12e-08
Association between a genetic variant related to glutamic acid metabolism and coronary heart disease in individuals with type 2 diabetes	Qi et al. (2013) [11]	Stage 1 and 2	CHD	rs10953541	C	7q22	0.95	0.82	1.1	0.47
Genomewide association analysis of coronary artery disease	Samani et al. (2007) [51]	WTCC & German MI Family Study	CAD+MI	rs10965212	A		1.26	1.18	1.34	2.18e-11
A genome-wide association study identifies LIPA as a susceptibility gene for coronary artery disease	Wild et al. (2011) [60]	GWAS & Replication 1	CAD	rs10965212	A	MTAP	1.21	1.17	1.26	1.39e-25
Genomewide association analysis of coronary artery disease	Samani et al. (2007) [51]	WTCC & German MI Family Study	CAD+MI	rs10965215	A		1.28	1.2	1.37	8.28e-13
A genome-wide association study identifies LIPA as a susceptibility gene for coronary artery disease	Wild et al. (2011) [60]	GWAS & Replication 1	CAD	rs10965215	A	MTAP	1.21	1.17	1.26	1.32e-25
Risk loci for coronary artery calcification replicated at 9p21 and 6q24 in the Heinz Nixdorf Recall Study	Pechlivanis et al. (2013) [48]		CAC	rs10965219	G	CDKN2A/2B	1.16	1.05	1.29	0.005
Genomewide association analysis of coronary artery disease	Samani et al. (2007) [51]	WTCC & German MI Family Study	CAD+MI	rs10965219	G		1.27	1.19	1.36	2.33e-12
A genome-wide association study identifies LIPA as a susceptibility gene for coronary artery disease	Wild et al. (2011) [60]	GWAS & Replication 1	CAD	rs10965219	G	intergenic	1.23	1.18	1.27	2.02e-25
Novel risk genes identified in a genome-wide association study for coronary artery disease in patients with type 1 diabetes	Charmet et al. (2018) [30]	Discovery stage only	CAD in T1DM	rs11042937	T	MRVI1-CTR9	1.06	0.908	1.248	0.22
Identification of 64 Novel Genetic Loci Provides an Expanded View on the Genetic Architecture of Coronary Artery Disease	van der Harst and Verweij (2018) [15]		CAD	rs11042937	T	.	1.04112	1.02814	1.05427	2.545e-10
Genetic analysis in UK Biobank links insulin resistance and transendothelial migration pathways to coronary artery disease	Klarin et al. (2017) [41]	UK Biobank & Stage 2	CAD	rs11057401	A	CCDC92	0.943396	0.925926	0.961538	3.88e-09
Association analyses based on false discovery rate implicate new loci for coronary artery disease.	Nelson et al. (2017) [46]		CAD	rs11057401	A	CCDC92	0.96	0.94	0.97	8.09e-07
Identification of 64 Novel Genetic Loci Provides an Expanded View on the Genetic Architecture of Coronary Artery Disease	van der Harst and Verweij (2018) [15]		CAD	rs11057401	A	CCDC92(0)|DNAH10(+7.039kb)	0.962424	0.949682	0.975337	2.235e-08
Association analyses based on false discovery rate implicate new loci for coronary artery disease.	Nelson et al. (2017) [46]		CAD	rs11057830	A	SCARB1	1.07	1.05	1.1	4.45e-09
Identification of 64 Novel Genetic Loci Provides an Expanded View on the Genetic Architecture of Coronary Artery Disease	van der Harst and Verweij (2018) [15]		CAD	rs11057830	A	SCARB1(0)	1.08556	1.06679	1.10467	2.713e-20
A comprehensive 1,000 Genomes-based genome-wide association meta-analysis of coronary artery disease	Nikpay et al. (2015) [5]		CAD	rs11065979	T	SH2B3	1.07	1.05	1.09	1.93e-10
Identification of 64 Novel Genetic Loci Provides an Expanded View on the Genetic Architecture of Coronary Artery Disease	van der Harst and Verweij (2018) [15]		CAD	rs11065979	T	.	1.07047	1.0563	1.08484	1.328e-23
A genome-wide association study of a coronary artery disease risk variant	Lee et al. (2013) [42]		CAD	rs11066001	C		1.4	1.27	1.55	7.83e-11
Genome-wide association study of coronary artery disease in the Japanese	Takeuchi et al. (2012) [54]		CAD	rs11066001	C	BRAP	1.42	1.34	1.5	9.1e-34
A genome-wide association study of a coronary artery disease risk variant	Lee et al. (2013) [42]		CAD	rs11066015	A	ACAD10	1.41	1.27	1.56	4.51e-11
Identification of 13 novel susceptibility loci for early-onset myocardial infarction, hypertension, or chronic kidney disease	Yamada et al. (2018a) [62]		MI	rs11066015	A	ACAD10	0.37	0.29	0.49	0.0001
Identification of 26 novel loci that confer susceptibility to early-onset coronary artery disease in a Japanese population	Yamada et al. (2018b) [63]		Early-onset CAD	rs11066015	A	ACAD10	1.79	1.42	2.25	0.0001
A genome-wide association study of a coronary artery disease risk variant	Lee et al. (2013) [42]		CAD	rs11066280	A	RPL6-PTPN11	0.75188	0.680272	0.826446	1.44e-08
Genome-wide association study in Han Chinese identifies four new susceptibility loci for coronary artery disease	Lu et al. (2012) [44]	Discovery & replications 1,2	CAD	rs11066280	A	C12orf51	1.19	1.13	1.25	1.69e-11
Identification of 13 novel susceptibility loci for early-onset myocardial infarction, hypertension, or chronic kidney disease	Yamada et al. (2018a) [62]		MI	rs11066280	A	HECTD4	2.66	2.05	3.46	0.0001
Identification of 26 novel loci that confer susceptibility to early-onset coronary artery disease in a Japanese population	Yamada et al. (2018b) [63]		Early-onset CAD	rs11066280	A	HECTD4	1.73	1.38	2.17	0.0001
Transethnic Meta-analysis of Genome-wide Association Studies Identifies Three New Loci and Characterizes Population-specific Differences for Coronary Artery Disease	Matsunaga et al. (2020) [16]	Japanese GWAS, UK Biobank & CARDIoGRAMplusC4D	CAD	rs11099493	A	RASGEF1B-HNRNPD	1.05	1.03	1.07	4.16e-08
Identification of 64 Novel Genetic Loci Provides an Expanded View on the Genetic Architecture of Coronary Artery Disease	van der Harst and Verweij (2018) [15]		CAD	rs11099493	A	HNRNPD,RASGEF1B	1.04	1.03	1.06	5.1e-10
Association analyses based on false discovery rate implicate new loci for coronary artery disease.	Nelson et al. (2017) [46]		CAD	rs111245230	C	SVEP1	1.12	1.07	1.17	7.22e-07
Identification of 64 Novel Genetic Loci Provides an Expanded View on the Genetic Architecture of Coronary Artery Disease	van der Harst and Verweij (2018) [15]		CAD	rs111245230	C	SVEP1(0)	1.10296	1.06682	1.14033	8.028e-09
Association analyses based on false discovery rate implicate new loci for coronary artery disease.	Nelson et al. (2017) [46]		CAD	rs11170820	G	FLJ12825	1.09	1.05	1.13	5.1e-07
Identification of 64 Novel Genetic Loci Provides an Expanded View on the Genetic Architecture of Coronary Artery Disease	van der Harst and Verweij (2018) [15]		CAD	rs11170820	G	FLJ12825(0)|LOC400043(-5.939kb)	1.10175	1.07403	1.13018	1.086e-13
Association analyses based on false discovery rate implicate new loci for coronary artery disease.	Nelson et al. (2017) [46]		CAD	rs11172113	C	LRP1	1.04	1.02	1.06	2.3e-06
Identification of 64 Novel Genetic Loci Provides an Expanded View on the Genetic Architecture of Coronary Artery Disease	van der Harst and Verweij (2018) [15]		CAD	rs11172113	C	LRP1(0)	1.03552	1.02261	1.04859	5.574e-08
Novel risk genes identified in a genome-wide association study for coronary artery disease in patients with type 1 diabetes	Charmet et al. (2018) [30]	Discovery stage only	CAD in T1DM	rs11191416	T	CYP17A1	0.9	0.686	1.186	0.768
Association analyses based on false discovery rate implicate new loci for coronary artery disease.	Nelson et al. (2017) [46]		CAD	rs11191416	T	CYP17A1	1.08	1.05	1.1	5.45e-09
A comprehensive 1,000 Genomes-based genome-wide association meta-analysis of coronary artery disease	Nikpay et al. (2015) [5]		CAD	rs11191416	T	CYP17A1-CNNM2-NT5C2	1.08	1.05	1.11	4.65e-09
Shared genetic susceptibility to ischemic stroke and coronary artery disease: a genome-wide analysis of common variants	Dichgans et al. (2014) [32]		CAD	rs11203042	T	LIPA	1.06	1.03	1.09	6.51e-05
Genome-wide association study of coronary artery disease among individuals with diabetes: the UK Biobank	Fall et al. (2018) [18]	CAD+DM vs DM	CAD	rs11203042	T	LIPA	1.03	0.97	1.08
Genome-wide association study of coronary artery disease among individuals with diabetes: the UK Biobank	Fall et al. (2018) [18]	CAD+DM vs non-DM	CAD	rs11203042	T	LIPA	1.03	1.01	1.05
Novel risk genes identified in a genome-wide association study for coronary artery disease in patients with type 1 diabetes	Charmet et al. (2018) [30]	Discovery stage only	CAD in T1DM	rs11206510	T	PCSK9	1.08	0.883	1.324	0.223
Shared genetic susceptibility to ischemic stroke and coronary artery disease: a genome-wide analysis of common variants	Dichgans et al. (2014) [32]		CAD	rs11206510	T	PCSK9	1.08696	1.03093	1.13636	0.000203
Genome-wide association study of coronary artery disease among individuals with diabetes: the UK Biobank	Fall et al. (2018) [18]	CAD+DM vs DM	CAD	rs11206510	T	PCSK9	1	0.93	1.07
Genome-wide association study of coronary artery disease among individuals with diabetes: the UK Biobank	Fall et al. (2018) [18]	CAD+DM vs non-DM	CAD	rs11206510	T	PCSK9	1.04	1.01	1.07
Genome-wide association study identifies a missense variant at APOA5 for coronary artery disease in Multi-Ethnic Cohorts from Southeast Asia	Han et al. (2017) [36]	Discovery & validation stages	CAD	rs11206510	T	PCSK9	1	0.85	1.18	0.974
A genome-wide association study identifies PLCL2 and AP3D1-DOT1L-SF3A2 as new susceptibility loci for myocardial infarction in Japanese	Hirokawa et al. (2015) [19]		MI	rs11206510	T	PCSK9	0.89	0.73	1.09	0.278
Genome-wide association of early-onset myocardial infarction with single nucleotide polymorphisms and copy number variants	Kathiresan et al. (2009) [39]		Early-onset MI	rs11206510	T	PCSK9	1.15	1.1	1.21	9.6e-09
A genome-wide association study of a coronary artery disease risk variant	Lee et al. (2013) [42]		CAD	rs11206510	T	PCSK9	1.09	0.98	1.23	0.12
Transethnic Meta-analysis of Genome-wide Association Studies Identifies Three New Loci and Characterizes Population-specific Differences for Coronary Artery Disease	Matsunaga et al. (2020) [16]	Japanese GWAS, UK Biobank & CARDIoGRAMplusC4D	CAD	rs11206510	T	BSND-PCSK9	1.07	1.04	1.09	1.01e-08
A comprehensive 1,000 Genomes-based genome-wide association meta-analysis of coronary artery disease	Nikpay et al. (2015) [5]		CAD	rs11206510	T	PCSK9	1.08	1.05	1.11	2.34e-08
A genome-wide association study in europeans and South asians identifies five new loci for coronary artery disease	Peden et al. (2011) [49]		CAD	rs11206510	T	PCSK9	1.05	1	1.11	0.07
Association between a genetic variant related to glutamic acid metabolism and coronary heart disease in individuals with type 2 diabetes	Qi et al. (2013) [11]	Stage 1 and 2	CHD	rs11206510	T	PCSK9	1.21	1.02	1.43	0.03
Identification of ADAMTS7 as a novel locus for coronary atherosclerosis and association of ABO with myocardial infarction in the presence of coronary atherosclerosis: two genome-wide association studies	Reilly et al. (2011) [50]	Angio. CAD vs non-CAD	CAD	rs11206510	T	PCSK9	1.03	0.94	1.13	0.4857
Identification of ADAMTS7 as a novel locus for coronary atherosclerosis and association of ABO with myocardial infarction in the presence of coronary atherosclerosis: two genome-wide association studies	Reilly et al. (2011) [50]	CAD+MI vs CAD-MI	MI in CHD	rs11206510	T	PCSK9	1.02	0.94	1.11	0.65
Large-scale association analysis identifies 13 new susceptibility loci for coronary artery disease	Schunkert et al. (2011) [52]	CARDIoGRAM and replication	CAD	rs11206510	T	PCSK9	1.08	1.05	1.11	9.1e-08
Novel risk genes identified in a genome-wide association study for coronary artery disease in patients with type 1 diabetes	Charmet et al. (2018) [30]	Discovery stage only	CAD in T1DM	rs1122608	G	LDLR	0.87	0.731	1.048	0.926
Shared genetic susceptibility to ischemic stroke and coronary artery disease: a genome-wide analysis of common variants	Dichgans et al. (2014) [32]		CAD	rs1122608	G	LDLR/SMARCA4	1.13636	1.08696	1.17647	3.32e-11
Genome-wide association study of coronary artery disease among individuals with diabetes: the UK Biobank	Fall et al. (2018) [18]	CAD+DM vs DM	CAD	rs1122608	G	LDLR	1.02	0.96	1.08
Genome-wide association study of coronary artery disease among individuals with diabetes: the UK Biobank	Fall et al. (2018) [18]	CAD+DM vs non-DM	CAD	rs1122608	G	LDLR	1.04	1.02	1.06
Genome-wide association of early-onset myocardial infarction with single nucleotide polymorphisms and copy number variants	Kathiresan et al. (2009) [39]		Early-onset MI	rs1122608	G	LDLR	1.15	1.1	1.2	1.9e-09
A genome-wide association study of a coronary artery disease risk variant	Lee et al. (2013) [42]		CAD	rs1122608	G	LDLR	0.94	1.05	1.11	0.35
Association between a genetic variant related to glutamic acid metabolism and coronary heart disease in individuals with type 2 diabetes	Qi et al. (2013) [11]	Stage 1 and 2	CHD	rs1122608	G	LDLR	1.08	0.93	1.26	0.3
Identification of ADAMTS7 as a novel locus for coronary atherosclerosis and association of ABO with myocardial infarction in the presence of coronary atherosclerosis: two genome-wide association studies	Reilly et al. (2011) [50]	CAD+MI vs CAD-MI	MI in CHD	rs1122608	G	LDLR	0.98	0.91	1.05	0.62
Identification of ADAMTS7 as a novel locus for coronary atherosclerosis and association of ABO with myocardial infarction in the presence of coronary atherosclerosis: two genome-wide association studies	Reilly et al. (2011) [50]	Angio. CAD vs non-CAD	CAD	rs1122608	G	LDLR	1.18	1.09	1.28	0.0001568
Large-scale association analysis identifies 13 new susceptibility loci for coronary artery disease	Schunkert et al. (2011) [52]	CARDIoGRAM only	CAD	rs1122608	G	LDLR	1.14	1.09	1.18	9.73e-10
Association analyses based on false discovery rate implicate new loci for coronary artery disease.	Nelson et al. (2017) [46]		CAD	rs112635299	T	SERPINA1	0.85	0.79	0.92	1.78e-05
Identification of 64 Novel Genetic Loci Provides an Expanded View on the Genetic Architecture of Coronary Artery Disease	van der Harst and Verweij (2018) [15]		CAD	rs112635299	T	SERPINA2,SERPINA1	0.87	0.84	0.91	8.4e-10
Association analyses based on false discovery rate implicate new loci for coronary artery disease.	Nelson et al. (2017) [46]		CAD	rs112941079	A	SEMA5A	1.06383	1.03093	1.08696	4.47e-06
Identification of 64 Novel Genetic Loci Provides an Expanded View on the Genetic Architecture of Coronary Artery Disease	van der Harst and Verweij (2018) [15]		CAD	rs112941079	A	SEMA5A(0)|SNHG18(-0.213kb)|SNORD123(-2.84kb)	1.06343	1.04586	1.0813	3.752e-13
Association analyses based on false discovery rate implicate new loci for coronary artery disease.	Nelson et al. (2017) [46]		CAD	rs11509880	A	TMEM106B	1.03	1.02	1.05	9.56e-05
Identification of 64 Novel Genetic Loci Provides an Expanded View on the Genetic Architecture of Coronary Artery Disease	van der Harst and Verweij (2018) [15]		CAD	rs11509880	A	TMEM106B,THSD7A	1.04	1.02	1.05	2.8e-08
Identification of 13 novel susceptibility loci for early-onset myocardial infarction, hypertension, or chronic kidney disease	Yamada et al. (2018a) [62]		MI	rs115287176	A	TMOD4	0.01	0.01	0.11	0.0001
Identification of 26 novel loci that confer susceptibility to early-onset coronary artery disease in a Japanese population	Yamada et al. (2018b) [63]		Early-onset CAD	rs115287176	A	TMOD4	0.02	0.01	0.1	0.0001
Novel risk genes identified in a genome-wide association study for coronary artery disease in patients with type 1 diabetes	Charmet et al. (2018) [30]	Discovery stage only	CAD in T1DM	rs11556924	C	ZC3HC1	0.97	0.832	1.147	0.61
Shared genetic susceptibility to ischemic stroke and coronary artery disease: a genome-wide analysis of common variants	Dichgans et al. (2014) [32]		CAD	rs11556924	C	ZC3HC1	1.0989	1.06383	1.1236	2.55e-10
Genome-wide association study of coronary artery disease among individuals with diabetes: the UK Biobank	Fall et al. (2018) [18]	CAD+DM vs DM	CAD	rs11556924	C	ZC3HC1	1	0.95	1.06
Genome-wide association study of coronary artery disease among individuals with diabetes: the UK Biobank	Fall et al. (2018) [18]	CAD+DM vs non-DM	CAD	rs11556924	C	ZC3HC1	1.05	1.03	1.07
Genome-wide association study identifies a missense variant at APOA5 for coronary artery disease in Multi-Ethnic Cohorts from Southeast Asia	Han et al. (2017) [36]	Discovery & validation stages	CAD	rs11556924	C	ZC3HC1	1.05263	0.909091	1.23457	0.486
A genome-wide association study of a coronary artery disease risk variant	Lee et al. (2013) [42]		CAD	rs11556924	C	ZC3HC1	1.11	0.9	1.36	0.34
Transethnic Meta-analysis of Genome-wide Association Studies Identifies Three New Loci and Characterizes Population-specific Differences for Coronary Artery Disease	Matsunaga et al. (2020) [16]	Japanese GWAS, UK Biobank & CARDIoGRAMplusC4D	CAD	rs11556924	C	ZC3HC1	1.07	1.05	1.09	4.68e-14
Association analyses based on false discovery rate implicate new loci for coronary artery disease.	Nelson et al. (2017) [46]		CAD	rs11556924	C	ZC3HC1	1.07	1.05	1.09	6.04e-13
A comprehensive 1,000 Genomes-based genome-wide association meta-analysis of coronary artery disease	Nikpay et al. (2015) [5]		CAD	rs11556924	C	ZC3HC1	1.08	1.05	1.1	5.34e-11
Association between a genetic variant related to glutamic acid metabolism and coronary heart disease in individuals with type 2 diabetes	Qi et al. (2013) [11]	Stage 1 and 2	CHD	rs11556924	C	ZC3HC1	0.94	0.83	1.08	0.41
Large-scale association analysis identifies 13 new susceptibility loci for coronary artery disease	Schunkert et al. (2011) [52]	CARDIoGRAM and replication	CAD	rs11556924	C	ZC3HC1	1.09	1.07	1.12	9.18e-18
Identification of 64 Novel Genetic Loci Provides an Expanded View on the Genetic Architecture of Coronary Artery Disease	van der Harst and Verweij (2018) [15]		CAD	rs11556924	C	ZC3HC1(0)	1.06375	1.05131	1.07633	1.38e-24
Association analyses based on false discovery rate implicate new loci for coronary artery disease.	Nelson et al. (2017) [46]		CAD	rs11591147	T	PCSK9 - SOFT	0.8	0.746269	0.854701	1.61e-10
Identification of 64 Novel Genetic Loci Provides an Expanded View on the Genetic Architecture of Coronary Artery Disease	van der Harst and Verweij (2018) [15]		CAD	rs11591147	T	PCSK9(0)	0.754198	0.715324	0.795185	1.609e-25
Association analyses based on false discovery rate implicate new loci for coronary artery disease.	Nelson et al. (2017) [46]		CAD	rs11617955	T	COL4A1	1.08696	1.06383	1.1236	2.62e-10
A comprehensive 1,000 Genomes-based genome-wide association meta-analysis of coronary artery disease	Nikpay et al. (2015) [5]		CAD	rs11617955	T	COL4A1/A2	1.09	1.06	1.13	3.55e-08
Identification of 64 Novel Genetic Loci Provides an Expanded View on the Genetic Architecture of Coronary Artery Disease	van der Harst and Verweij (2018) [15]		CAD	rs11617955	T	COL4A1(0)	1.08448	1.06426	1.10508	3.6e-17
Association analyses based on false discovery rate implicate new loci for coronary artery disease.	Nelson et al. (2017) [46]		CAD	rs116843064	A	ANGPTL4	0.85	0.8	0.91	2.3e-07
Identification of 64 Novel Genetic Loci Provides an Expanded View on the Genetic Architecture of Coronary Artery Disease	van der Harst and Verweij (2018) [15]		CAD	rs116843064	A	ANGPTL4(0)|RAB11B-AS1(-9.936kb)	0.851377	0.812574	0.892033	1.268e-11
Association analyses based on false discovery rate implicate new loci for coronary artery disease.	Nelson et al. (2017) [46]		CAD	rs11728590	G	C4orf41	1.04	1.02	1.05	1.94e-05
Identification of 64 Novel Genetic Loci Provides an Expanded View on the Genetic Architecture of Coronary Artery Disease	van der Harst and Verweij (2018) [15]		CAD	rs11728590	G	.	1.02357	1.01042	1.0369	0.0003806
A genome-wide association study identifies PLCL2 and AP3D1-DOT1L-SF3A2 as new susceptibility loci for myocardial infarction in Japanese	Hirokawa et al. (2015) [19]		MI	rs11752643	T	HLA-DQB1	1.40845	1.19048	1.66667	9.93e-05
Genome-wide association study of coronary artery disease in the Japanese	Takeuchi et al. (2012) [54]		CAD	rs11752643	T	HLA, DRB-DQB	1.26	1.15	1.38	4.7e-07
Novel risk genes identified in a genome-wide association study for coronary artery disease in patients with type 1 diabetes	Charmet et al. (2018) [30]	Discovery stage only	CAD in T1DM	rs11810571	G	TDRKH	1.05	0.836	1.316	0.339
Transethnic Meta-analysis of Genome-wide Association Studies Identifies Three New Loci and Characterizes Population-specific Differences for Coronary Artery Disease	Matsunaga et al. (2020) [16]	Japanese GWAS, UK Biobank & CARDIoGRAMplusC4D	CAD	rs11810571	G	TDRKH	1.05	1.03	1.07	4.41e-08
Association analyses based on false discovery rate implicate new loci for coronary artery disease.	Nelson et al. (2017) [46]		CAD	rs11810571	G	TDRKH	1.057	1.036	1.079	4.24e-08
Identification of 64 Novel Genetic Loci Provides an Expanded View on the Genetic Architecture of Coronary Artery Disease	van der Harst and Verweij (2018) [15]		CAD	rs11810571	G	TDRKH(0)	1.05686	1.04001	1.07398	1.831e-11
Identification of 13 novel susceptibility loci for early-onset myocardial infarction, hypertension, or chronic kidney disease	Yamada et al. (2018a) [62]		MI	rs11823828	G	OR52E4	2.46	1.93	3.13	0.0001
Identification of 26 novel loci that confer susceptibility to early-onset coronary artery disease in a Japanese population	Yamada et al. (2018b) [63]		Early-onset CAD	rs11823828	G	OR52E4	2.44	2.01	2.97	0.0001
Novel risk genes identified in a genome-wide association study for coronary artery disease in patients with type 1 diabetes	Charmet et al. (2018) [30]	Discovery stage only	CAD in T1DM	rs11838776	A	COL4A2	1.33	1.113	1.606	0.001
Association analyses based on false discovery rate implicate new loci for coronary artery disease.	Nelson et al. (2017) [46]		CAD	rs11838776	A	COL4A2	1.06	1.04	1.08	2.2e-09
A comprehensive 1,000 Genomes-based genome-wide association meta-analysis of coronary artery disease	Nikpay et al. (2015) [5]		CAD	rs11838776	A	COL4A1/A2	1.07	1.05	1.09	1.83e-10
Association analyses based on false discovery rate implicate new loci for coronary artery disease.	Nelson et al. (2017) [46]		CAD	rs12146487	A	PLCB3	0.95	0.93	0.97	1.8e-05
Identification of 64 Novel Genetic Loci Provides an Expanded View on the Genetic Architecture of Coronary Artery Disease	van der Harst and Verweij (2018) [15]		CAD	rs12146487	A	PLCB3(0)	0.966282	0.950317	0.982515	5.719e-05
Association analyses based on false discovery rate implicate new loci for coronary artery disease.	Nelson et al. (2017) [46]		CAD	rs1214752	T	ABCC10	0.96	0.95	0.98	2.34e-06
Identification of 64 Novel Genetic Loci Provides an Expanded View on the Genetic Architecture of Coronary Artery Disease	van der Harst and Verweij (2018) [15]		CAD	rs1214752	T	ABCC10(0)|MIR6780B(-5.954kb)	0.96996	0.958057	0.982012	1.459e-06
Novel risk genes identified in a genome-wide association study for coronary artery disease in patients with type 1 diabetes	Charmet et al. (2018) [30]	Discovery stage only	CAD in T1DM	rs12190287	C	TCF21	1.06	0.896	1.27	0.232
Shared genetic susceptibility to ischemic stroke and coronary artery disease: a genome-wide analysis of common variants	Dichgans et al. (2014) [32]		CAD	rs12190287	C	TCF21	1.11111	1.07527	1.14943	2.32e-09
Genome-wide association study of coronary artery disease among individuals with diabetes: the UK Biobank	Fall et al. (2018) [18]	CAD+DM vs DM	CAD	rs12190287	C	TCF21	1.05	0.99	1.11
Genome-wide association study of coronary artery disease among individuals with diabetes: the UK Biobank	Fall et al. (2018) [18]	CAD+DM vs non-DM	CAD	rs12190287	C	TCF21	1.06	1.04	1.08
A genome-wide association study of a coronary artery disease risk variant	Lee et al. (2013) [42]		CAD	rs12190287	C	TCF21d	1.04	0.94	1.16	0.45
Association between a genetic variant related to glutamic acid metabolism and coronary heart disease in individuals with type 2 diabetes	Qi et al. (2013) [11]	Stage 1 and 2	CHD	rs12190287	C	TCF21	1.02	0.89	1.16	0.82
Large-scale association analysis identifies 13 new susceptibility loci for coronary artery disease	Schunkert et al. (2011) [52]	CARDIoGRAM and replication	CAD	rs12190287	C	TCF21	1.08	1.06	1.1	1.07e-12
Novel risk genes identified in a genome-wide association study for coronary artery disease in patients with type 1 diabetes	Charmet et al. (2018) [30]	Discovery stage only	CAD in T1DM	rs12202017	A	TCF21	1.02	0.856	1.215	0.411
Genome-wide association study identifies a missense variant at APOA5 for coronary artery disease in Multi-Ethnic Cohorts from Southeast Asia	Han et al. (2017) [36]	Discovery & validation stages	CAD	rs12202017	A	TCF21	1.11111	1.03093	1.19048	0.00308
Association analyses based on false discovery rate implicate new loci for coronary artery disease.	Nelson et al. (2017) [46]		CAD	rs12202017	A	MGC34034	1.07	1.05	1.09	5.78e-14
Identification of 13 novel susceptibility loci for early-onset myocardial infarction, hypertension, or chronic kidney disease	Yamada et al. (2018a) [62]		MI	rs12229654	G	-	2.27	1.67	3.07	0.0001
Identification of 26 novel loci that confer susceptibility to early-onset coronary artery disease in a Japanese population	Yamada et al. (2018b) [63]		Early-onset CAD	rs12229654	G	-	1.72	1.31	2.25	0.0001
Identification of 13 novel susceptibility loci for early-onset myocardial infarction, hypertension, or chronic kidney disease	Yamada et al. (2018a) [62]		MI	rs12231744	T	NAA25	0.4	0.3	0.53	0.0001
Identification of 26 novel loci that confer susceptibility to early-onset coronary artery disease in a Japanese population	Yamada et al. (2018b) [63]		Early-onset CAD	rs12231744	T	NAA25	0.55	0.43	0.7	0.0001
Genome-wide association study of coronary artery disease among individuals with diabetes: the UK Biobank	Fall et al. (2018) [18]	CAD+DM vs DM	CAD	rs12413409	G	CYP17A1-CNNM2-NT5C2	1.09	0.99	1.21
Genome-wide association study of coronary artery disease among individuals with diabetes: the UK Biobank	Fall et al. (2018) [18]	CAD+DM vs non-DM	CAD	rs12413409	G	CYP17A1-CNNM2-NT5C2	1.08	1.04	1.12
Genome-wide association study identifies a missense variant at APOA5 for coronary artery disease in Multi-Ethnic Cohorts from Southeast Asia	Han et al. (2017) [36]	Discovery & validation stages	CAD	rs12413409	G	CYP17A1-CNNM2-NT5C2	1.0989	1.0101	1.19048	0.0212
A genome-wide association study identifies PLCL2 and AP3D1-DOT1L-SF3A2 as new susceptibility loci for myocardial infarction in Japanese	Hirokawa et al. (2015) [19]		MI	rs12413409	G	CNNM2	1.1	1	1.21	0.0612
A genome-wide association study of a coronary artery disease risk variant	Lee et al. (2013) [42]		CAD	rs12413409	G	CYP17A1-NT5C2	1.09	0.98	1.23	0.12
Association between a genetic variant related to glutamic acid metabolism and coronary heart disease in individuals with type 2 diabetes	Qi et al. (2013) [11]	Stage 1 and 2	CHD	rs12413409	G	CYP17A1, CNNM2, NT5C2	1.07	0.85	1.36	0.57
Large-scale association analysis identifies 13 new susceptibility loci for coronary artery disease	Schunkert et al. (2011) [52]	CARDIoGRAM and replication	CAD	rs12413409	G	CYP17A1,CNNM2,NT5C2	1.12	1.08	1.16	1.03e-09
Novel risk genes identified in a genome-wide association study for coronary artery disease in patients with type 1 diabetes	Charmet et al. (2018) [30]	Discovery stage only	CAD in T1DM	rs12493885	C	ARHGEF26	0.87	0.691	1.089	0.89
Genetic analysis in UK Biobank links insulin resistance and transendothelial migration pathways to coronary artery disease	Klarin et al. (2017) [41]	UK Biobank & Stage 2	CAD	rs12493885	C	ARHGEF26	1.08	1.06	1.11	1.02e-09
Association analyses based on false discovery rate implicate new loci for coronary artery disease.	Nelson et al. (2017) [46]		CAD	rs12493885	C	ARHGEF26	1.07	1.05	1.1	3.22e-08
Identification of 64 Novel Genetic Loci Provides an Expanded View on the Genetic Architecture of Coronary Artery Disease	van der Harst and Verweij (2018) [15]		CAD	rs12493885	C	ARHGEF26(0)|ARHGEF26-AS1(+0.867kb)	1.07681	1.05674	1.09726	1.129e-14
Novel risk genes identified in a genome-wide association study for coronary artery disease in patients with type 1 diabetes	Charmet et al. (2018) [30]	Discovery stage only	CAD in T1DM	rs1250229	T	FN1	0.88	0.73	1.06	0.911
Transethnic Meta-analysis of Genome-wide Association Studies Identifies Three New Loci and Characterizes Population-specific Differences for Coronary Artery Disease	Matsunaga et al. (2020) [16]	Japanese GWAS, UK Biobank & CARDIoGRAMplusC4D	CAD	rs1250229	T	FN1-MREG	1.07	1.05	1.09	1.91e-14
Association analyses based on false discovery rate implicate new loci for coronary artery disease.	Nelson et al. (2017) [46]		CAD	rs1250229	T	FN1	1.07	1.05	1.09	1.78e-13
Identification of 64 Novel Genetic Loci Provides an Expanded View on the Genetic Architecture of Coronary Artery Disease	van der Harst and Verweij (2018) [15]		CAD	rs1250229	T	FN1(+3.593kb)	1.06652	1.05157	1.08168	2.537e-19
A genome-wide association study identifies PLCL2 and AP3D1-DOT1L-SF3A2 as new susceptibility loci for myocardial infarction in Japanese	Hirokawa et al. (2015) [19]		MI	rs12524865	C	TCF21	1.16	1.07	1.27	0.000717
Genome-wide association study in Han Chinese identifies four new susceptibility loci for coronary artery disease	Lu et al. (2012) [44]	Discovery & replications 1,2	CAD	rs12524865	C	TCF21	1.11	1.06	1.16	1.87e-07
Large-scale association analysis identifies 13 new susceptibility loci for coronary artery disease	Schunkert et al. (2011) [52]	CARDIoGRAM and replication	CAD	rs12524865	C		1.07	1.04	1.09	2.29e-08
Genome-wide association study of coronary artery disease among individuals with diabetes: the UK Biobank	Fall et al. (2018) [18]	CAD+DM vs DM	CAD	rs12526453	C	PHACTR1	1.07	1.01	1.13
Genome-wide association study of coronary artery disease among individuals with diabetes: the UK Biobank	Fall et al. (2018) [18]	CAD+DM vs non-DM	CAD	rs12526453	C	PHACTR1	1.05	1.03	1.07
Genome-wide association of early-onset myocardial infarction with single nucleotide polymorphisms and copy number variants	Kathiresan et al. (2009) [39]		Early-onset MI	rs12526453	C	PHACTR1	1.12	1.08	1.17	1.3e-09
Association between a genetic variant related to glutamic acid metabolism and coronary heart disease in individuals with type 2 diabetes	Qi et al. (2013) [11]	Stage 1 and 2	CHD	rs12526453	C	PHACTR1	1.09	0.96	1.25	0.2
Identification of ADAMTS7 as a novel locus for coronary atherosclerosis and association of ABO with myocardial infarction in the presence of coronary atherosclerosis: two genome-wide association studies	Reilly et al. (2011) [50]	CAD+MI vs CAD-MI	MI in CHD	rs12526453	C	PHACTR1	1.05	0.98	1.12	0.2
Identification of ADAMTS7 as a novel locus for coronary atherosclerosis and association of ABO with myocardial infarction in the presence of coronary atherosclerosis: two genome-wide association studies	Reilly et al. (2011) [50]	Angio. CAD vs non-CAD	CAD	rs12526453	C	PHACTR1	1.17	1.09	1.26	1.45e-05
Large-scale association analysis identifies 13 new susceptibility loci for coronary artery disease	Schunkert et al. (2011) [52]	CARDIoGRAM only	CAD	rs12526453	C	PHACTR1	1.1	1.06	1.13	1.15e-09
Transethnic Meta-analysis of Genome-wide Association Studies Identifies Three New Loci and Characterizes Population-specific Differences for Coronary Artery Disease	Matsunaga et al. (2020) [16]	Japanese GWAS, UK Biobank & CARDIoGRAMplusC4D	CAD	rs12619842	C	FIGN-GRB14	0.952381	0.925926	0.970874	2.97e-08
Association analyses based on false discovery rate implicate new loci for coronary artery disease.	Nelson et al. (2017) [46]		CAD	rs12619842	C	FIGN	0.95	0.93	0.97	8.46e-06
Identification of 64 Novel Genetic Loci Provides an Expanded View on the Genetic Architecture of Coronary Artery Disease	van der Harst and Verweij (2018) [15]		CAD	rs12619842	C	.	0.94658	0.931123	0.962293	6.401e-11
Genome-wide association study of coronary heart disease and its risk factors in 8,090 African Americans: the NHLBI CARe Project	Lettre et al. (2011) [43]		CHD	rs12740374	T	CELSR2	1.03	0.87	1.22	0.7265
Identification of 64 Novel Genetic Loci Provides an Expanded View on the Genetic Architecture of Coronary Artery Disease	van der Harst and Verweij (2018) [15]		CAD	rs12740374	T	CELSR2(0)|PSRC1(-4.585kb)	0.883468	0.870064	0.897078	2.467e-57
Identification of 26 novel loci that confer susceptibility to early-onset coronary artery disease in a Japanese population	Yamada et al. (2018b) [63]		Early-onset CAD	rs12740374	T	CELSR2	0.63	0.51	0.79	0.0001
Novel risk genes identified in a genome-wide association study for coronary artery disease in patients with type 1 diabetes	Charmet et al. (2018) [30]	Discovery stage only	CAD in T1DM	rs12801636	A	PCNX3	0.98	0.81	1.189	0.425
Transethnic Meta-analysis of Genome-wide Association Studies Identifies Three New Loci and Characterizes Population-specific Differences for Coronary Artery Disease	Matsunaga et al. (2020) [16]	Japanese GWAS, UK Biobank & CARDIoGRAMplusC4D	CAD	rs12801636	A	PCNXL3	0.952381	0.934579	0.970874	1.68e-08
Association analyses based on false discovery rate implicate new loci for coronary artery disease.	Nelson et al. (2017) [46]		CAD	rs12801636	A	PCNXL3	0.96	0.94	0.98	6.85e-06
Identification of 64 Novel Genetic Loci Provides an Expanded View on the Genetic Architecture of Coronary Artery Disease	van der Harst and Verweij (2018) [15]		CAD	rs12801636	A	MAP3K11(+9.597kb)|PCNXL3(0)	0.956858	0.94456	0.969317	3.075e-11
Association analyses based on false discovery rate implicate new loci for coronary artery disease.	Nelson et al. (2017) [46]		CAD	rs12922	A	MAPRE2	1.05263	1.03093	1.07527	2.88e-05
Identification of 64 Novel Genetic Loci Provides an Expanded View on the Genetic Architecture of Coronary Artery Disease	van der Harst and Verweij (2018) [15]		CAD	rs12922	A	MAPRE2(0)	1.03479	1.0155	1.05445	0.0003849
Novel risk genes identified in a genome-wide association study for coronary artery disease in patients with type 1 diabetes	Charmet et al. (2018) [30]	Discovery stage only	CAD in T1DM	rs12936587	G	RAI1	1	0.857	1.174	0.48
Genome-wide association study of coronary artery disease among individuals with diabetes: the UK Biobank	Fall et al. (2018) [18]	CAD+DM vs non-DM	CAD	rs12936587	G	RAI1-PEMT-RASD1	1.03	1.01	1.05
Genome-wide association study of coronary artery disease among individuals with diabetes: the UK Biobank	Fall et al. (2018) [18]	CAD+DM vs DM	CAD	rs12936587	G	RAI1-PEMT-RASD1	1.08	1.02	1.13
A genome-wide association study of a coronary artery disease risk variant	Lee et al. (2013) [42]		CAD	rs12936587	G	PEMT	1.06	0.93	1.22	0.36
Association between a genetic variant related to glutamic acid metabolism and coronary heart disease in individuals with type 2 diabetes	Qi et al. (2013) [11]	Stage 1 and 2	CHD	rs12936587	G	RASD1, SMCR3, PEMT	0.98	0.86	1.12	0.78
Large-scale association analysis identifies 13 new susceptibility loci for coronary artery disease	Schunkert et al. (2011) [52]	CARDIoGRAM and replication	CAD	rs12936587	G	RASD1,SMCR3,PEMT	1.07	1.05	1.09	4.45e-10
Identification of 64 Novel Genetic Loci Provides an Expanded View on the Genetic Architecture of Coronary Artery Disease	van der Harst and Verweij (2018) [15]		CAD	rs12936587	G	.	1.03676	1.02504	1.04861	3.336e-10
Association analyses based on false discovery rate implicate new loci for coronary artery disease.	Nelson et al. (2017) [46]		CAD	rs13003675	T	GIGYF2	1.04	1.03	1.06	1.3e-06
Identification of 64 Novel Genetic Loci Provides an Expanded View on the Genetic Architecture of Coronary Artery Disease	van der Harst and Verweij (2018) [15]		CAD	rs13003675	T	GIGYF2(0)	1.03521	1.0217	1.04889	2.264e-07
SNPs on chromosome 5p15.3 associated with myocardial infarction in Japanese population	Aoki et al. (2011) [14]	Stage 2 only	MI	rs1333042	G		1.14233	1.02155	1.27739	0.021
Genome-wide association study identifies a new locus for coronary artery disease on chromosome 10p11.23	Erdmann et al. (2011) [34]	Stages 1	CAD	rs1333042	G		1.22	1.1	1.37	0.000336
Genome-wide association study identifies a new locus for coronary artery disease on chromosome 10p11.23	Erdmann et al. (2011) [34]	Stage 2 GerMIFS II	CAD	rs1333042	G		1.31	1.17	1.5	1.38e-06
Genome-wide association study identifies a new locus for coronary artery disease on chromosome 10p11.23	Erdmann et al. (2011) [34]	Stage 2 GerMIFS I	CAD	rs1333042	G		1.36	1.21	1.53	1.32e-07
Genome-wide association study identifies a missense variant at APOA5 for coronary artery disease in Multi-Ethnic Cohorts from Southeast Asia	Han et al. (2017) [36]	Discovery stage only	CAD	rs1333042	G	CDKN2B-AS1	1.21	1.1316	1.2884	1.58e-06
A genome-wide association study of a coronary artery disease risk variant	Lee et al. (2013) [42]		CAD	rs1333042	G	CDKN2BAS	1.2987	1.19048	1.40845	1.42e-09
Genome-wide association study of coronary heart disease and its risk factors in 8,090 African Americans: the NHLBI CARe Project	Lettre et al. (2011) [43]		CHD	rs1333042	G	-	1.0101	0.847458	1.20482	0.8713
Genome-wide association study in Han Chinese identifies four new susceptibility loci for coronary artery disease	Lu et al. (2012) [44]	Discovery & replications 1,2	CAD	rs1333042	G	CDKN2A/B	1.37	1.31	1.44	3.22e-40
Genomewide association analysis of coronary artery disease	Samani et al. (2007) [51]	WTCC only	CAD	rs1333042	G		1.34	1.23	1.45	2.45e-12
A genome-wide association study identifies LIPA as a susceptibility gene for coronary artery disease	Wild et al. (2011) [60]	GWAS & Replication 1	CAD	rs1333042	G	intergenic	1.3	1.25	1.35	7.3e-40
A genome-wide association study of a coronary artery disease risk variant	Lee et al. (2013) [42]		CAD	rs1333045	C		1.29	1.19	1.4	4.28e-10
A genome-wide association study reveals susceptibility loci for myocardial infarction/coronary artery disease in Saudi Arabs	Wakil et al. (2016) [57]		MI	rs1333045	C	CDKN2A/B	0.79	0.73	0.86	1.15e-08
A genome-wide association study of a coronary artery disease risk variant	Lee et al. (2013) [42]		CAD	rs1333048	A		0.775194	0.714286	0.840336	4.18e-10
Genomewide association analysis of coronary artery disease	Samani et al. (2007) [51]	WTCC only	CAD	rs1333048	A		0.735294	0.675676	0.8	1.28e-13
Genome-wide association identifies a susceptibility locus for coronary artery disease in the Chinese Han population	Wang et al. (2011) [58]	Stage 1 (Dis-Hubei only)	CAD	rs1333048	A	ANRIL	0.518135	0.346021	0.775194	0.002
Genome-wide association identifies a susceptibility locus for coronary artery disease in the Chinese Han population	Wang et al. (2011) [58]	Stage 1 (Dis-Beijing only)	CAD	rs1333048	A	ANRIL	0.606061	0.429185	0.862069	0.006
Genome-wide association identifies a susceptibility locus for coronary artery disease in the Chinese Han population	Wang et al. (2011) [58]	Stages 2+3 (Rep-Shandong only)	CAD	rs1333048	A	ANRIL	0.757576	0.675676	0.854701	4.57e-06
A genome-wide association study identifies LIPA as a susceptibility gene for coronary artery disease	Wild et al. (2011) [60]	GWAS & Replication 1	CAD	rs1333048	A	intergenic	0.769231	0.746269	0.8	8.78e-44
Identification of 26 novel loci that confer susceptibility to early-onset coronary artery disease in a Japanese population	Yamada et al. (2018b) [63]		Early-onset CAD	rs1333048	A	-	0.714286	0.609756	0.840336	0.0001
Genome-wide association study of 14,000 cases of seven common diseases and 3,000 shared controls	Burton et al. (2007) [29]		CAD	rs1333049	C	CDKN2A/2B	1.9	1.61	2.24	1.16e-13
Genome-wide association study identifies a new locus for coronary artery disease on chromosome 10p11.23	Erdmann et al. (2011) [34]	Stages 1	CAD	rs1333049	C		1.23	1.1	1.37	0.000328
Genome-wide association study identifies a new locus for coronary artery disease on chromosome 10p11.23	Erdmann et al. (2011) [34]	Stage 2 GerMIFS I	CAD	rs1333049	C		1.3	1.16	1.45	8.33e-06
Genome-wide association study identifies a new locus for coronary artery disease on chromosome 10p11.23	Erdmann et al. (2011) [34]	Stage 2 GerMIFS II	CAD	rs1333049	C		1.31	1.18	1.47	1.59e-06
A genome-wide association study of a coronary artery disease risk variant	Lee et al. (2013) [42]		CAD	rs1333049	C	CDKN2A/2B	1.26	1.17	1.34	6.05e-09
Genome-Wide Association and Functional Studies Identify SCML4 and THSD7A as Novel Susceptibility Genes for Coronary Artery Disease	Li et al. (2018) [13]		CAD	rs1333049	C	CDKN2BAS	1.25	1.21	1.3	1e-25
Genome-wide association study in Han Chinese identifies four new susceptibility loci for coronary artery disease	Lu et al. (2012) [44]	Discovery & replications 1,2	CAD	rs1333049	C	CDKN2A/B	1.34	1.28	1.4	1.74e-40
Genomewide association analysis of coronary artery disease	Samani et al. (2007) [51]	WTCC & German MI Family Study	CAD+MI	rs1333049	C		1.36	1.27	1.46	2.91e-19
Identification of 64 Novel Genetic Loci Provides an Expanded View on the Genetic Architecture of Coronary Artery Disease	van der Harst and Verweij (2018) [15]		CAD	rs1333049	C	CDKN2B-AS1(+4.41kb)	1.20671	1.19167	1.22195	2.02e-192
A genome-wide association study identifies LIPA as a susceptibility gene for coronary artery disease	Wild et al. (2011) [60]	GWAS, Replication 1 & 2	CAD	rs1333049	C	intergenic	1.27	1.23	1.31	7.12e-58
Identification of 26 novel loci that confer susceptibility to early-onset coronary artery disease in a Japanese population	Yamada et al. (2018b) [63]		Early-onset CAD	rs1333049	C	-	1.41	1.2	1.66	0.0001
Genome-wide association identifies a susceptibility locus for coronary artery disease in the Chinese Han population	Wang et al. (2011) [58]	Stage 1 (Dis-Beijing only)	CAD	rs1333049	C	ANRIL	1.65	1.16	2.33	0.008
Genome-wide association identifies a susceptibility locus for coronary artery disease in the Chinese Han population	Wang et al. (2011) [58]	Stage 1 (Dis-Hubei only)	CAD	rs1333049	C	ANRIL	1.93	1.29	2.89	0.0006
Association analyses based on false discovery rate implicate new loci for coronary artery disease.	Nelson et al. (2017) [46]		CAD	rs13723	G	CORO6	1.03	1.02	1.05	3.61e-05
Identification of 64 Novel Genetic Loci Provides an Expanded View on the Genetic Architecture of Coronary Artery Disease	van der Harst and Verweij (2018) [15]		CAD	rs13723	G	CORO6,ANKRD13B,GIT1,SSH2,EFCAB5	1.04167	1.03093	1.05263	5.6e-10
Association analyses based on false discovery rate implicate new loci for coronary artery disease.	Nelson et al. (2017) [46]		CAD	rs13734	A	RRBP1	1.04	1.02	1.06	2e-05
Identification of 64 Novel Genetic Loci Provides an Expanded View on the Genetic Architecture of Coronary Artery Disease	van der Harst and Verweij (2018) [15]		CAD	rs13734	A	DSTN(+6.077kb)|RRBP1(0)	1.03915	1.02318	1.05536	1.04e-06
Bivariate Genome-Wide Association Scan Identifies 6 Novel Loci Associated With Lipid Levels and Coronary Artery Disease	Siewert and Voight (2018) [53]		CAD co-localize with lipid levels	rs1378942	A		0.98	0.97	0.99	1.8e-05
Identification of 64 Novel Genetic Loci Provides an Expanded View on the Genetic Architecture of Coronary Artery Disease	van der Harst and Verweij (2018) [15]		CAD	rs1378942	A	CSK(0)|MIR4513(-3.645kb)	0.974627	0.963233	0.986157	2.055e-05
Genetic analysis in UK Biobank links insulin resistance and transendothelial migration pathways to coronary artery disease	Klarin et al. (2017) [41]	UK Biobank	CAD	rs140570886	C	LPA	1.92	1.68	2.2	2.2e-21
Identification of 64 Novel Genetic Loci Provides an Expanded View on the Genetic Architecture of Coronary Artery Disease	van der Harst and Verweij (2018) [15]		CAD	rs140570886	C	LPA(0)	1.61753	1.53726	1.69893	2.689e-87
Novel risk genes identified in a genome-wide association study for coronary artery disease in patients with type 1 diabetes	Charmet et al. (2018) [30]	Discovery stage only	CAD in T1DM	rs1412444	T	LIPA	0.94	0.798	1.116	0.749
Genome-wide association study of coronary artery disease among individuals with diabetes: the UK Biobank	Fall et al. (2018) [18]	CAD+DM vs DM	CAD	rs1412444	T	LIPA	1.04	0.99	1.1
Genome-wide association study of coronary artery disease among individuals with diabetes: the UK Biobank	Fall et al. (2018) [18]	CAD+DM vs non-DM	CAD	rs1412444	T	LIPA	1.04	1.02	1.06
A genome-wide association study identifies PLCL2 and AP3D1-DOT1L-SF3A2 as new susceptibility loci for myocardial infarction in Japanese	Hirokawa et al. (2015) [19]		MI	rs1412444	T	LIPA	0.93	0.84	1.02	0.153
A genome-wide association study of a coronary artery disease risk variant	Lee et al. (2013) [42]		CAD	rs1412444	T	LIPA	0.87	0.78	0.97	0.01
A comprehensive 1,000 Genomes-based genome-wide association meta-analysis of coronary artery disease	Nikpay et al. (2015) [5]		CAD	rs1412444	T	LIPA	1.07	1.05	1.09	5.15e-12
A genome-wide association study in europeans and South asians identifies five new loci for coronary artery disease	Peden et al. (2011) [49]		CAD	rs1412444	T	LIPA	1.09	1.07	1.12	2.76e-13
Association between a genetic variant related to glutamic acid metabolism and coronary heart disease in individuals with type 2 diabetes	Qi et al. (2013) [11]	Stage 1 and 2	CHD	rs1412444	T	LIPA	0.99	0.86	1.13	0.89
Identification of 64 Novel Genetic Loci Provides an Expanded View on the Genetic Architecture of Coronary Artery Disease	van der Harst and Verweij (2018) [15]		CAD	rs1412444	T	LIPA(0)	1.06609	1.05239	1.07997	2.693e-22
A genome-wide association study identifies LIPA as a susceptibility gene for coronary artery disease	Wild et al. (2011) [60]	GWAS, Replication 1 & 2	CAD	rs1412444	T	LIPA	1.1	1.07	1.14	3.71e-08
SNPs on chromosome 5p15.3 associated with myocardial infarction in Japanese population	Aoki et al. (2011) [14]	Stage 2 only	MI	rs1412834	T		0.86802	0.775517	0.971557	0.015
Genome-wide association study identifies a missense variant at APOA5 for coronary artery disease in Multi-Ethnic Cohorts from Southeast Asia	Han et al. (2017) [36]	Discovery stage only	CAD	rs1412834	T	CDKN2B-AS1	0.829187	0.778574	0.886839	2.7e-06
Novel risk genes identified in a genome-wide association study for coronary artery disease in patients with type 1 diabetes	Charmet et al. (2018) [30]	Discovery stage only	CAD in T1DM	rs142695226	G	ITGB5	0.95	0.754	1.195	0.672
Association analyses based on false discovery rate implicate new loci for coronary artery disease.	Nelson et al. (2017) [46]		CAD	rs142695226	G	UMPS-ITGB5	1.071	1.048	1.095	1.53e-09
Association analyses based on false discovery rate implicate new loci for coronary artery disease.	Nelson et al. (2017) [46]		CAD	rs143803699	G	AGAP1	1.13	1.06	1.19	3.56e-05
Identification of 64 Novel Genetic Loci Provides an Expanded View on the Genetic Architecture of Coronary Artery Disease	van der Harst and Verweij (2018) [15]		CAD	rs143803699	G	AGAP1(0)	1.0753	1.02952	1.12312	0.001065
Identification of 13 novel susceptibility loci for early-onset myocardial infarction, hypertension, or chronic kidney disease	Yamada et al. (2018a) [62]		MI	rs146092501	T	COL6A3	0.01	0.01	0.1	0.0001
Identification of 26 novel loci that confer susceptibility to early-onset coronary artery disease in a Japanese population	Yamada et al. (2018b) [63]		Early-onset CAD	rs146092501	T	COL6A3	0.02	0.01	0.1	0.0001
Identification of 13 novel susceptibility loci for early-onset myocardial infarction, hypertension, or chronic kidney disease	Yamada et al. (2018a) [62]		MI	rs146879198	A	ZNF77	0.01	0.01	0.11	0.0001
Identification of 26 novel loci that confer susceptibility to early-onset coronary artery disease in a Japanese population	Yamada et al. (2018b) [63]		Early-onset CAD	rs146879198	A	ZNF77	0.02	0.01	0.1	0.0001
Association analyses based on false discovery rate implicate new loci for coronary artery disease.	Nelson et al. (2017) [46]		CAD	rs147555597	A	LPAL2	1.31	1.19	1.45	4.43e-08
Identification of 64 Novel Genetic Loci Provides an Expanded View on the Genetic Architecture of Coronary Artery Disease	van der Harst and Verweij (2018) [15]		CAD	rs147555597	A	LPAL2(0)	1.4884	1.3919	1.59159	2.731e-31
Genome-wide association study identifies a missense variant at APOA5 for coronary artery disease in Multi-Ethnic Cohorts from Southeast Asia	Han et al. (2017) [36]	Discovery stage only	CAD	rs1537372	T	CDKN2B-AS1	1.221	1.14652	1.29548	1.5e-07
A genome-wide association study of a coronary artery disease risk variant	Lee et al. (2013) [42]		CAD	rs1537372	T		1.27	1.17	1.37	6.69e-09
Genome-wide association study identifies a missense variant at APOA5 for coronary artery disease in Multi-Ethnic Cohorts from Southeast Asia	Han et al. (2017) [36]	Discovery stage only	CAD	rs1537373	G	CDKN2B-AS1	1.21	1.1316	1.2884	1.62e-06
Risk loci for coronary artery calcification replicated at 9p21 and 6q24 in the Heinz Nixdorf Recall Study	Pechlivanis et al. (2013) [48]		CAC	rs1537373	G	CDKN2A/2B	1.19	1.07	1.31	0.001
Genome-wide association study identifies a missense variant at APOA5 for coronary artery disease in Multi-Ethnic Cohorts from Southeast Asia	Han et al. (2017) [36]	Discovery stage only	CAD	rs1537376	C	CDKN2B-AS1	1.211	1.13652	1.28548	4.79e-07
A genome-wide association study of a coronary artery disease risk variant	Lee et al. (2013) [42]		CAD	rs1537376	C		1.26	1.16	1.36	2.11e-08
Shared genetic susceptibility to ischemic stroke and coronary artery disease: a genome-wide analysis of common variants	Dichgans et al. (2014) [32]		CAD	rs1561198	T	VAMP5-VAMP8-GGCX	1.06	1.03	1.09	0.000605
Genome-wide association study of coronary artery disease among individuals with diabetes: the UK Biobank	Fall et al. (2018) [18]	CAD+DM vs DM	CAD	rs1561198	T	VAMP5-VAMP8-GGCX	1.06	1.01	1.12
Genome-wide association study of coronary artery disease among individuals with diabetes: the UK Biobank	Fall et al. (2018) [18]	CAD+DM vs non-DM	CAD	rs1561198	T	VAMP5-VAMP8-GGCX	1.05	1.03	1.07
Genome-wide association study identifies a missense variant at APOA5 for coronary artery disease in Multi-Ethnic Cohorts from Southeast Asia	Han et al. (2017) [36]	Discovery & validation stages	CAD	rs1561198	T	VAMP5-VAMP8-GGCX	1.05	0.98	1.13	0.137
Identification of 64 Novel Genetic Loci Provides an Expanded View on the Genetic Architecture of Coronary Artery Disease	van der Harst and Verweij (2018) [15]		CAD	rs1561198	T	VAMP5(-1.541kb)|VAMP8(+0.833kb)	1.06067	1.04765	1.07385	1.496e-20
Association analyses based on false discovery rate implicate new loci for coronary artery disease.	Nelson et al. (2017) [46]		CAD	rs167479	T	RGL3	0.96	0.9	0.98	4.9e-06
Identification of 64 Novel Genetic Loci Provides an Expanded View on the Genetic Architecture of Coronary Artery Disease	van der Harst and Verweij (2018) [15]		CAD	rs167479	T	CCDC151(-4.506kb)|RGL3(0)	0.957624	0.945687	0.969712	1.102e-11
Novel risk genes identified in a genome-wide association study for coronary artery disease in patients with type 1 diabetes	Charmet et al. (2018) [30]	Discovery stage only	CAD in T1DM	rs16986953	A	AK097927	1.07	0.799	1.45	0.314
Genome-wide association study of coronary artery disease among individuals with diabetes: the UK Biobank	Fall et al. (2018) [18]	CAD+DM vs DM	CAD	rs16986953	A	AK097927	1.14	1.03	1.26
Genome-wide association study of coronary artery disease among individuals with diabetes: the UK Biobank	Fall et al. (2018) [18]	CAD+DM vs non-DM	CAD	rs16986953	A	AK097927	1.09	1.05	1.13
Genome-wide association study identifies a missense variant at APOA5 for coronary artery disease in Multi-Ethnic Cohorts from Southeast Asia	Han et al. (2017) [36]	Discovery & validation stages	CAD	rs16986953	A	AK097927	1.06	0.98	1.15	0.134
Transethnic Meta-analysis of Genome-wide Association Studies Identifies Three New Loci and Characterizes Population-specific Differences for Coronary Artery Disease	Matsunaga et al. (2020) [16]	Japanese GWAS, UK Biobank & CARDIoGRAMplusC4D	CAD	rs16986953	A	OSR1-TTC32	1.1	1.08	1.13	1.39e-13
Association analyses based on false discovery rate implicate new loci for coronary artery disease.	Nelson et al. (2017) [46]		CAD	rs16986953	A	FLJ12334	1.11	1.08	1.15	3.14e-10
A comprehensive 1,000 Genomes-based genome-wide association meta-analysis of coronary artery disease	Nikpay et al. (2015) [5]		CAD	rs16986953	A	AK097927	1.09	1.06	1.12	1.45e-08
Identification of 64 Novel Genetic Loci Provides an Expanded View on the Genetic Architecture of Coronary Artery Disease	van der Harst and Verweij (2018) [15]		CAD	rs16986953	A	.	1.08926	1.06666	1.11235	1.348e-15
Novel risk genes identified in a genome-wide association study for coronary artery disease in patients with type 1 diabetes	Charmet et al. (2018) [30]	Discovery stage only	CAD in T1DM	rs17087335	T	NOA1	0.99	0.812	1.215	0.523
Genome-wide association study of coronary artery disease among individuals with diabetes: the UK Biobank	Fall et al. (2018) [18]	CAD+DM vs DM	CAD	rs17087335	T	REST-NOA1	1.01	0.94	1.08
Genome-wide association study of coronary artery disease among individuals with diabetes: the UK Biobank	Fall et al. (2018) [18]	CAD+DM vs non-DM	CAD	rs17087335	T	REST-NOA1	1.05	1.02	1.07
Genome-wide association study identifies a missense variant at APOA5 for coronary artery disease in Multi-Ethnic Cohorts from Southeast Asia	Han et al. (2017) [36]	Discovery & validation stages	CAD	rs17087335	T	REST-NOA1	1.04	0.97	1.12	0.299
A comprehensive 1,000 Genomes-based genome-wide association meta-analysis of coronary artery disease	Nikpay et al. (2015) [5]		CAD	rs17087335	T	REST-NOA1	1.06	1.04	1.09	4.59e-08
Shared genetic susceptibility to ischemic stroke and coronary artery disease: a genome-wide analysis of common variants	Dichgans et al. (2014) [32]		CAD	rs17114036	A	PPAP2B	1.14943	1.0989	1.21951	9.78e-09
Genome-wide association study of coronary artery disease among individuals with diabetes: the UK Biobank	Fall et al. (2018) [18]	CAD+DM vs DM	CAD	rs17114036	A	PPAP2B	1.08	0.98	1.18
Genome-wide association study of coronary artery disease among individuals with diabetes: the UK Biobank	Fall et al. (2018) [18]	CAD+DM vs non-DM	CAD	rs17114036	A	PPAP2B	1.11	1.07	1.14
A genome-wide association study of a coronary artery disease risk variant	Lee et al. (2013) [42]		CAD	rs17114036	A	PPAP2B	1.47	1.09	1.99	0.01
Association between a genetic variant related to glutamic acid metabolism and coronary heart disease in individuals with type 2 diabetes	Qi et al. (2013) [11]	Stage 1 and 2	CHD	rs17114036	A	PPAP2B	0.91	0.72	1.15	0.44
Large-scale association analysis identifies 13 new susceptibility loci for coronary artery disease	Schunkert et al. (2011) [52]	CARDIoGRAM and replication	CAD	rs17114036	A	PPAP2B	1.17	1.13	1.22	3.81e-19
Genome-wide association of early-onset myocardial infarction with single nucleotide polymorphisms and copy number variants	Kathiresan et al. (2009) [39]		Early-onset MI	rs17228212	C	SMAD3	0.990099	0.952381	1.04167	0.69
Genomewide association analysis of coronary artery disease	Samani et al. (2007) [51]	WTCC & German MI Family Study	CAD+MI	rs17228212	C		1.21	1.13	1.3	1.98e-07
Large-scale association analysis identifies 13 new susceptibility loci for coronary artery disease	Schunkert et al. (2011) [52]	CARDIoGRAM only	CAD	rs17228212	C	SMAD3	1.014	0.983	1.046	0.382
Genome-wide association study identifies a missense variant at APOA5 for coronary artery disease in Multi-Ethnic Cohorts from Southeast Asia	Han et al. (2017) [36]	Discovery & validation stages	CAD	rs17411031	C	LPL	1.08696	1	1.19048	0.0473
A comprehensive 1,000 Genomes-based genome-wide association meta-analysis of coronary artery disease	Nikpay et al. (2015) [5]		CAD	rs17411031	C	LPL	1.05	1.03	1.08	1.17e-06
A genome-wide association study identifies PLCL2 and AP3D1-DOT1L-SF3A2 as new susceptibility loci for myocardial infarction in Japanese	Hirokawa et al. (2015) [19]		MI	rs1746048	C	CXCL12	1.03	0.94	1.13	0.516
Genome-wide association of early-onset myocardial infarction with single nucleotide polymorphisms and copy number variants	Kathiresan et al. (2009) [39]		Early-onset MI	rs1746048	C	CXCL12	1.14	1.08	1.21	3.4e-05
A genome-wide association study of a coronary artery disease risk variant	Lee et al. (2013) [42]		CAD	rs1746048	C	CXCL12	0.91	1.05	1.11	0.02
A genome-wide association study in europeans and South asians identifies five new loci for coronary artery disease	Peden et al. (2011) [49]		CAD	rs1746048	C	CXCL12	1.06	1.01	1.1	0.00852
Association between a genetic variant related to glutamic acid metabolism and coronary heart disease in individuals with type 2 diabetes	Qi et al. (2013) [11]	Stage 1 and 2	CHD	rs1746048	C	CXCL12	0.98	0.82	1.17	0.84
Identification of ADAMTS7 as a novel locus for coronary atherosclerosis and association of ABO with myocardial infarction in the presence of coronary atherosclerosis: two genome-wide association studies	Reilly et al. (2011) [50]	CAD+MI vs CAD-MI	MI in CHD	rs1746048	C	CXCL12	1.04	0.95	1.14	0.42
Identification of ADAMTS7 as a novel locus for coronary atherosclerosis and association of ABO with myocardial infarction in the presence of coronary atherosclerosis: two genome-wide association studies	Reilly et al. (2011) [50]	Angio. CAD vs non-CAD	CAD	rs1746048	C	CXCL12	1.08	0.97	1.18	0.1681
Genomewide association analysis of coronary artery disease	Samani et al. (2007) [51]	WTCC & German MI Family Study	CAD+MI	rs1746048	C		1.29	1.17	1.43	5.73e-07
Large-scale association analysis identifies 13 new susceptibility loci for coronary artery disease	Schunkert et al. (2011) [52]	CARDIoGRAM and replication	CAD	rs1746048	C	CXCL12	1.09	1.07	1.13	2.93e-10
Genomewide association analysis of coronary artery disease	Samani et al. (2007) [51]	WTCC & German MI Family Study	CAD+MI	rs1746049	C		1.29	1.16	1.43	8.77e-07
A genome-wide association study reveals susceptibility loci for myocardial infarction/coronary artery disease in Saudi Arabs	Wakil et al. (2016) [57]		CAD	rs1746049	C	CXCL12	0.8	0.73	0.88	2.44e-06
Novel risk genes identified in a genome-wide association study for coronary artery disease in patients with type 1 diabetes	Charmet et al. (2018) [30]	Discovery stage only	CAD in T1DM	rs17464857	T	MIA3	1.12	0.901	1.405	0.148
Genome-wide association study of coronary artery disease among individuals with diabetes: the UK Biobank	Fall et al. (2018) [18]	CAD+DM vs DM	CAD	rs17464857	T	MIA3	1.09	1.01	1.17
Genome-wide association study of coronary artery disease among individuals with diabetes: the UK Biobank	Fall et al. (2018) [18]	CAD+DM vs non-DM	CAD	rs17464857	T	MIA3	1.06	1.03	1.09
Genome-wide association study of coronary artery disease among individuals with diabetes: the UK Biobank	Fall et al. (2018) [18]	CAD+DM vs DM	CAD	rs17465637	C	MIA3	1.05	0.99	1.11
Genome-wide association study of coronary artery disease among individuals with diabetes: the UK Biobank	Fall et al. (2018) [18]	CAD+DM vs non-DM	CAD	rs17465637	C	MIA3	1.07	1.05	1.09
Genome-wide association study identifies a missense variant at APOA5 for coronary artery disease in Multi-Ethnic Cohorts from Southeast Asia	Han et al. (2017) [36]	Discovery & validation stages	CAD	rs17465637	C	MIA3	1.07	0.99	1.15	0.077
Genome-wide association of early-onset myocardial infarction with single nucleotide polymorphisms and copy number variants	Kathiresan et al. (2009) [39]		Early-onset MI	rs17465637	C	MIA3	1.13	1.08	1.18	4.9e-07
A genome-wide association study of a coronary artery disease risk variant	Lee et al. (2013) [42]		CAD	rs17465637	C	MIA3	1.04	0.93	1.16	0.48
Association between a genetic variant related to glutamic acid metabolism and coronary heart disease in individuals with type 2 diabetes	Qi et al. (2013) [11]	Stage 1 and 2	CHD	rs17465637	C	MIA3	1.09	0.93	1.28	0.31
Identification of ADAMTS7 as a novel locus for coronary atherosclerosis and association of ABO with myocardial infarction in the presence of coronary atherosclerosis: two genome-wide association studies	Reilly et al. (2011) [50]	CAD+MI vs CAD-MI	MI in CHD	rs17465637	C	MIA3	1.03	0.95	1.11	0.55
Identification of ADAMTS7 as a novel locus for coronary atherosclerosis and association of ABO with myocardial infarction in the presence of coronary atherosclerosis: two genome-wide association studies	Reilly et al. (2011) [50]	Angio. CAD vs non-CAD	CAD	rs17465637	C	MIA3	1.09	1.01	1.18	0.02708
Genomewide association analysis of coronary artery disease	Samani et al. (2007) [51]	WTCC & German MI Family Study	CAD+MI	rs17465637	C		1.2	1.12	1.3	1.27e-06
Large-scale association analysis identifies 13 new susceptibility loci for coronary artery disease	Schunkert et al. (2011) [52]	Subset of CARDIoGRAM only	CAD	rs17465637	C	MIA3	1.14	1.09	1.2	1.36e-08
Identification of 64 Novel Genetic Loci Provides an Expanded View on the Genetic Architecture of Coronary Artery Disease	van der Harst and Verweij (2018) [15]		CAD	rs17465637	C	MIA3(0)	1.08513	1.07013	1.10034	8.447e-31
Novel risk genes identified in a genome-wide association study for coronary artery disease in patients with type 1 diabetes	Charmet et al. (2018) [30]	Discovery stage only	CAD in T1DM	rs17514846	A	FURIN-FES	1.08	0.924	1.267	0.163
Shared genetic susceptibility to ischemic stroke and coronary artery disease: a genome-wide analysis of common variants	Dichgans et al. (2014) [32]		CAD	rs17514846	A	FURIN-FES	1.07	1.04	1.11	7.49e-05
Genome-wide association study of coronary artery disease among individuals with diabetes: the UK Biobank	Fall et al. (2018) [18]	CAD+DM vs DM	CAD	rs17514846	A	FURIN-FES	1.07	1.01	1.13
Genome-wide association study of coronary artery disease among individuals with diabetes: the UK Biobank	Fall et al. (2018) [18]	CAD+DM vs non-DM	CAD	rs17514846	A	FURIN-FES	1.08	1.06	1.1
Genome-wide association study identifies a missense variant at APOA5 for coronary artery disease in Multi-Ethnic Cohorts from Southeast Asia	Han et al. (2017) [36]	Discovery & validation stages	CAD	rs17514846	A	FURIN-FES	1.02	0.93	1.11	0.73
A genome-wide association study identifies PLCL2 and AP3D1-DOT1L-SF3A2 as new susceptibility loci for myocardial infarction in Japanese	Hirokawa et al. (2015) [19]		MI	rs17514846	A	FURIN-FES	0.91	0.81	1.02	0.138
Identification of 64 Novel Genetic Loci Provides an Expanded View on the Genetic Architecture of Coronary Artery Disease	van der Harst and Verweij (2018) [15]		CAD	rs17514846	A	FURIN(0)	1.06759	1.05366	1.0817	9.64e-23
Genetic analysis in UK Biobank links insulin resistance and transendothelial migration pathways to coronary artery disease	Klarin et al. (2017) [41]	UK Biobank & Stage 3	CAD	rs17517928	C	FN1	1.06	1.04	1.08	1.06e-08
Identification of 64 Novel Genetic Loci Provides an Expanded View on the Genetic Architecture of Coronary Artery Disease	van der Harst and Verweij (2018) [15]		CAD	rs17517928	C	FN1(0)	1.04896	1.03365	1.06449	1.758e-10
Association analyses based on false discovery rate implicate new loci for coronary artery disease.	Nelson et al. (2017) [46]		CAD	rs17581137	A	LOC145820	1.04167	1.02041	1.06383	8.96e-06
Identification of 64 Novel Genetic Loci Provides an Expanded View on the Genetic Architecture of Coronary Artery Disease	van der Harst and Verweij (2018) [15]		CAD	rs17581137	A	Intergenic	1.04	1.02	1.05	1.2e-08
Novel risk genes identified in a genome-wide association study for coronary artery disease in patients with type 1 diabetes	Charmet et al. (2018) [30]	Discovery stage only	CAD in T1DM	rs17608766	C	GOSR2	0.89	0.705	1.121	0.84
Identification of 64 Novel Genetic Loci Provides an Expanded View on the Genetic Architecture of Coronary Artery Disease	van der Harst and Verweij (2018) [15]		CAD	rs17608766	C	GOSR2(0)	1.04802	1.03252	1.06375	8.199e-10
Novel risk genes identified in a genome-wide association study for coronary artery disease in patients with type 1 diabetes	Charmet et al. (2018) [30]	Discovery stage only	CAD in T1DM	rs17609940	G	ANKS1A	1.32	1.077	1.635	0.004
Genome-wide association study of coronary artery disease among individuals with diabetes: the UK Biobank	Fall et al. (2018) [18]	CAD+DM vs DM	CAD	rs17609940	G	ANKS1A	1.06	0.99	1.13
Genome-wide association study of coronary artery disease among individuals with diabetes: the UK Biobank	Fall et al. (2018) [18]	CAD+DM vs non-DM	CAD	rs17609940	G	ANKS1A	1.02	1	1.05
A genome-wide association study of a coronary artery disease risk variant	Lee et al. (2013) [42]		CAD	rs17609940	G	ANKS1A	1.04	0.81	1.33	0.76
Association between a genetic variant related to glutamic acid metabolism and coronary heart disease in individuals with type 2 diabetes	Qi et al. (2013) [11]	Stage 1 and 2	CHD	rs17609940	G	ANKS1A	1.01	0.86	1.18	0.94
Large-scale association analysis identifies 13 new susceptibility loci for coronary artery disease	Schunkert et al. (2011) [52]	CARDIoGRAM and replication	CAD	rs17609940	G	ANKS1A	1.07	1.05	1.1	1.36e-08
Genome-wide association study of 14,000 cases of seven common diseases and 3,000 shared controls	Burton et al. (2007) [29]		CAD	rs17672135	T		1.32	0.79	2.22	2.35e-06
Genomewide association analysis of coronary artery disease	Samani et al. (2007) [51]	German MI Family Study only	MI	rs17672135	T		0.94	0.79	1.12	0.48
Genomewide association analysis of coronary artery disease	Samani et al. (2007) [51]	WTCC only	CAD	rs17672135	T		1.29	1.13	1.47	0.000104
Large-scale association analysis identifies 13 new susceptibility loci for coronary artery disease	Schunkert et al. (2011) [52]	CARDIoGRAM only	CAD	rs17672135	T	FMN2	1.035	0.993	1.079	0.107
Novel risk genes identified in a genome-wide association study for coronary artery disease in patients with type 1 diabetes	Charmet et al. (2018) [30]	Discovery stage only	CAD in T1DM	rs17678683	G	ZEB2	1.23	0.9	1.692	0.095
Transethnic Meta-analysis of Genome-wide Association Studies Identifies Three New Loci and Characterizes Population-specific Differences for Coronary Artery Disease	Matsunaga et al. (2020) [16]	Japanese GWAS, UK Biobank & CARDIoGRAMplusC4D	CAD	rs17678683	G	ZEB2-TEX41	1.08	1.05	1.11	3.72e-08
Association analyses based on false discovery rate implicate new loci for coronary artery disease.	Nelson et al. (2017) [46]		CAD	rs17678683	G	ZEB2	1.07	1.04	1.1	8.87e-07
A comprehensive 1,000 Genomes-based genome-wide association meta-analysis of coronary artery disease	Nikpay et al. (2015) [5]		CAD	rs17678683	G	ZEB2-ACO74093.1	1.1	1.07	1.14	3e-09
Identification of 64 Novel Genetic Loci Provides an Expanded View on the Genetic Architecture of Coronary Artery Disease	van der Harst and Verweij (2018) [15]		CAD	rs17678683	G	LOC101928455(0)|ZEB2(+8.601kb)|ZEB2-AS1(+8.094kb)	1.0576	1.03504	1.08065	3.444e-07
Genetic analysis in UK Biobank links insulin resistance and transendothelial migration pathways to coronary artery disease	Klarin et al. (2017) [41]	UK Biobank & Stage 3	CAD	rs17843797	G	UMPS-ITGB5	1.07	1.05	1.1	1.52e-08
Identification of 64 Novel Genetic Loci Provides an Expanded View on the Genetic Architecture of Coronary Artery Disease	van der Harst and Verweij (2018) [15]		CAD	rs17843797	G	UMPS(0)	1.07026	1.05113	1.08973	1.673e-13
Genetic analysis in UK Biobank links insulin resistance and transendothelial migration pathways to coronary artery disease	Klarin et al. (2017) [41]	UK Biobank & Stage 2	CAD	rs1800449	T	LOX	1.07	1.05	1.09	2.99e-09
Association analyses based on false discovery rate implicate new loci for coronary artery disease.	Nelson et al. (2017) [46]		CAD	rs1800449	T	LOX	1.06	1.03	1.08	5.01e-07
Identification of 64 Novel Genetic Loci Provides an Expanded View on the Genetic Architecture of Coronary Artery Disease	van der Harst and Verweij (2018) [15]		CAD	rs1800449	T	LOX(0)	1.04477	1.02771	1.06212	2.013e-07
Novel risk genes identified in a genome-wide association study for coronary artery disease in patients with type 1 diabetes	Charmet et al. (2018) [30]	Discovery stage only	CAD in T1DM	rs1800775	A	CETP	1.0101	0.867303	1.18483	0.568
Identification of 64 Novel Genetic Loci Provides an Expanded View on the Genetic Architecture of Coronary Artery Disease	van der Harst and Verweij (2018) [15]		CAD	rs1800775	A	CETP(-0.598kb)	0.960309	0.948152	0.972622	5.525e-10
Novel risk genes identified in a genome-wide association study for coronary artery disease in patients with type 1 diabetes	Charmet et al. (2018) [30]	Discovery stage only	CAD in T1DM	rs1801251	A	KCNJ13	1.15	0.975	1.352	0.049
Identification of 64 Novel Genetic Loci Provides an Expanded View on the Genetic Architecture of Coronary Artery Disease	van der Harst and Verweij (2018) [15]		CAD	rs1801251	A	GIGYF2(0)|KCNJ13(0)	1.04248	1.02908	1.05605	3.063e-10
Novel risk genes identified in a genome-wide association study for coronary artery disease in patients with type 1 diabetes	Charmet et al. (2018) [30]	Discovery stage only	CAD in T1DM	rs180803	G	POM121L9P	1.18	0.51	2.743	0.348
Genome-wide association study identifies a missense variant at APOA5 for coronary artery disease in Multi-Ethnic Cohorts from Southeast Asia	Han et al. (2017) [36]	Discovery & validation stages	CAD	rs180803	G	POM121L9P-ADORA2A	1.06383	0.943396	1.21951	0.306
Association analyses based on false discovery rate implicate new loci for coronary artery disease.	Nelson et al. (2017) [46]		CAD	rs180803	G	POM121L9P	1.18	1.12	1.24	6.89e-10
A comprehensive 1,000 Genomes-based genome-wide association meta-analysis of coronary artery disease	Nikpay et al. (2015) [5]		CAD	rs180803	G	POM121L9P	1.2	1.13	1.27	1.64e-10
Genome-wide association study identifies a missense variant at APOA5 for coronary artery disease in Multi-Ethnic Cohorts from Southeast Asia	Han et al. (2017) [36]	Discovery stage only	CAD	rs1831733	C	CDKN2B-AS1	1.197	1.12252	1.27148	2.3e-06
Discovery of 318 new risk loci for type 2 diabetes and related vascular outcomes among 1.4 million participants in a multi-ancestry meta-analysis	Vujkovic et al. (2020) [56]		CHD with T2D	rs1831733	C	CDKN2B;CDKN2A	1.13088	1.10676	1.15553	2.6e-29
Discovery of 318 new risk loci for type 2 diabetes and related vascular outcomes among 1.4 million participants in a multi-ancestry meta-analysis	Vujkovic et al. (2020) [56]		CHD w/out T2D	rs1831733	C	CDKN2B;CDKN2A	1.16416	1.14156	1.1872	3.9e-52
A genome-wide association study identifies PLCL2 and AP3D1-DOT1L-SF3A2 as new susceptibility loci for myocardial infarction in Japanese	Hirokawa et al. (2015) [19]		MI	rs1842896	T	GUCY1A3	0.95	0.86	1.05	0.323
Genome-wide association study in Han Chinese identifies four new susceptibility loci for coronary artery disease	Lu et al. (2012) [44]	Discovery & replications 1,2,3	CAD	rs1842896	T	GUCY1A3	1.14	1.1	1.19	1.26e-11
Association analyses based on false discovery rate implicate new loci for coronary artery disease.	Nelson et al. (2017) [46]		CAD	rs186696265	T	PLG	1.62	1.51	1.75	2.11e-38
Identification of 64 Novel Genetic Loci Provides an Expanded View on the Genetic Architecture of Coronary Artery Disease	van der Harst and Verweij (2018) [15]		CAD	rs186696265	T	.	1.72754	1.63882	1.82107	4.61e-92
Novel risk genes identified in a genome-wide association study for coronary artery disease in patients with type 1 diabetes	Charmet et al. (2018) [30]	Discovery stage only	CAD in T1DM	rs1867624	T	PECAM1	0.943396	0.805802	1.11359	0.744
Identification of 64 Novel Genetic Loci Provides an Expanded View on the Genetic Architecture of Coronary Artery Disease	van der Harst and Verweij (2018) [15]		CAD	rs1867624	T	PECAM1(-9.685kb)	1.03759	1.02606	1.04925	8.088e-11
Association analyses based on false discovery rate implicate new loci for coronary artery disease.	Nelson et al. (2017) [46]		CAD	rs1870634	G	LOC283033	1.05	1.04	1.07	7.03e-10
A comprehensive 1,000 Genomes-based genome-wide association meta-analysis of coronary artery disease	Nikpay et al. (2015) [5]		CAD	rs1870634	G	CXCL12	1.08	1.06	1.1	5.55e-15
Identification of 64 Novel Genetic Loci Provides an Expanded View on the Genetic Architecture of Coronary Artery Disease	van der Harst and Verweij (2018) [15]		CAD	rs1870634	G	.	1.06184	1.04963	1.07419	3.504e-24
Novel risk genes identified in a genome-wide association study for coronary artery disease in patients with type 1 diabetes	Charmet et al. (2018) [30]	Discovery stage only	CAD in T1DM	rs1878406	T	EDNRA	1.06383	0.827815	1.35135	0.328
Shared genetic susceptibility to ischemic stroke and coronary artery disease: a genome-wide analysis of common variants	Dichgans et al. (2014) [32]		CAD	rs1878406	T	EDNRA	1.1	1.06	1.14	1.02e-06
Genome-wide association study of coronary artery disease among individuals with diabetes: the UK Biobank	Fall et al. (2018) [18]	CAD+DM vs DM	CAD	rs1878406	T	EDNRA	1.04	0.96	1.12
Genome-wide association study of coronary artery disease among individuals with diabetes: the UK Biobank	Fall et al. (2018) [18]	CAD+DM vs non-DM	CAD	rs1878406	T	EDNRA	1.07	1.04	1.1
Identification of 13 novel susceptibility loci for early-onset myocardial infarction, hypertension, or chronic kidney disease	Yamada et al. (2018a) [62]		MI	rs188378669	T	CXCL8	0.01	0.01	0.1	0.0001
Identification of 26 novel loci that confer susceptibility to early-onset coronary artery disease in a Japanese population	Yamada et al. (2018b) [63]		Early-onset CAD	rs188378669	T	CXCL8	0.02	0.01	0.09	0.0001
SNPs on chromosome 5p15.3 associated with myocardial infarction in Japanese population	Aoki et al. (2011) [14]	Stage 2 only	MI	rs1883838	T		0.977197	0.876206	1.08983	0.7
Genome-wide association study of perioperative myocardial infarction after coronary artery bypass surgery	Kertai et al. (2015) [40]		Peri-op MI after CABG	rs1883838	T	CD40-CDH22	1.74155	1.27421	2.38039	0.0005009
Novel risk genes identified in a genome-wide association study for coronary artery disease in patients with type 1 diabetes	Charmet et al. (2018) [30]	Discovery stage only	CAD in T1DM	rs1892094	T	ATP1B1	1.08	0.919	1.266	0.822
Identification of 64 Novel Genetic Loci Provides an Expanded View on the Genetic Architecture of Coronary Artery Disease	van der Harst and Verweij (2018) [15]		CAD	rs1892094	T	ATP1B1(0)|NME7(-7.308kb)	0.964447	0.954668	0.974327	3.138e-12
Identification of 13 novel susceptibility loci for early-onset myocardial infarction, hypertension, or chronic kidney disease	Yamada et al. (2018a) [62]		MI	rs192210727	T	ADGRL3	0.06	0.02	0.16	0.0001
Identification of 26 novel loci that confer susceptibility to early-onset coronary artery disease in a Japanese population	Yamada et al. (2018b) [63]		Early-onset CAD	rs192210727	T	ADGRL3	0.07	0.03	0.16	0.0001
Association analyses based on false discovery rate implicate new loci for coronary artery disease.	Nelson et al. (2017) [46]		CAD	rs1924981	T	FLT1	1.05	1.03	1.07	1.44e-07
A comprehensive 1,000 Genomes-based genome-wide association meta-analysis of coronary artery disease	Nikpay et al. (2015) [5]		CAD	rs1924981	T	FLT1	1.05	1.03	1.07	5.11e-07
Association analyses based on false discovery rate implicate new loci for coronary artery disease.	Nelson et al. (2017) [46]		CAD	rs194937	A	FAM46A	1.05	1.03	1.07	1.25e-05
Identification of 64 Novel Genetic Loci Provides an Expanded View on the Genetic Architecture of Coronary Artery Disease	van der Harst and Verweij (2018) [15]		CAD	rs194937	A	.	1.03738	1.02024	1.05481	1.534e-05
Novel risk genes identified in a genome-wide association study for coronary artery disease in patients with type 1 diabetes	Charmet et al. (2018) [30]	Discovery stage only	CAD in T1DM	rs1964272	G	SNRPD2	0.95	0.805	1.113	0.747
Association analyses based on false discovery rate implicate new loci for coronary artery disease.	Nelson et al. (2017) [46]		CAD	rs1964272	G	SNRPD2	1.047	1.03	1.064	2.46e-08
Association between a genetic variant related to glutamic acid metabolism and coronary heart disease in individuals with type 2 diabetes	Qi et al. (2013) [11]	Stage 1 and 2	CHD	rs1994016	C	ADAMTS7	1.04	0.91	1.18	0.59
Identification of ADAMTS7 as a novel locus for coronary atherosclerosis and association of ABO with myocardial infarction in the presence of coronary atherosclerosis: two genome-wide association studies	Reilly et al. (2011) [50]	Angio. CAD vs non-CAD	CAD	rs1994016	C	ADAMTS7	1.19	1.13	1.24	4.98e-13
Identification of 13 novel susceptibility loci for early-onset myocardial infarction, hypertension, or chronic kidney disease	Yamada et al. (2018a) [62]		MI	rs199921354	T	VPS33B	0.01	0.01	0.1	0.0001
Identification of 26 novel loci that confer susceptibility to early-onset coronary artery disease in a Japanese population	Yamada et al. (2018b) [63]		Early-onset CAD	rs199921354	T	VPS33B	0.02	0.01	0.09	0.0001
Transethnic Meta-analysis of Genome-wide Association Studies Identifies Three New Loci and Characterizes Population-specific Differences for Coronary Artery Disease	Matsunaga et al. (2020) [16]	Japanese GWAS, UK Biobank & CARDIoGRAMplusC4D	CAD	rs2000999	A	HPR	1.06	1.04	1.08	4.7e-10
Identification of 64 Novel Genetic Loci Provides an Expanded View on the Genetic Architecture of Coronary Artery Disease	van der Harst and Verweij (2018) [15]		CAD	rs2000999	A	HPR(0)	1.05422	1.03761	1.07109	8.129e-11
Identification of 13 novel susceptibility loci for early-onset myocardial infarction, hypertension, or chronic kidney disease	Yamada et al. (2018a) [62]		MI	rs200787930	T	PLCB2	0.01	0.01	0.1	0.0001
Identification of 26 novel loci that confer susceptibility to early-onset coronary artery disease in a Japanese population	Yamada et al. (2018b) [63]		Early-onset CAD	rs200787930	T	PLCB2	0.02	0.01	0.09	0.0001
Association analyses based on false discovery rate implicate new loci for coronary artery disease.	Nelson et al. (2017) [46]		CAD	rs2011559	G	PARD3B	1.05	1.03	1.08	2.66e-05
Identification of 64 Novel Genetic Loci Provides an Expanded View on the Genetic Architecture of Coronary Artery Disease	van der Harst and Verweij (2018) [15]		CAD	rs2011559	G	PARD3B(0)	1.02552	1.0068	1.04459	0.00738
Novel risk genes identified in a genome-wide association study for coronary artery disease in patients with type 1 diabetes	Charmet et al. (2018) [30]	Discovery stage only	CAD in T1DM	rs2023938	C	HDAC9	1.14943	0.881057	1.47275	0.161
Genome-wide association study of coronary artery disease among individuals with diabetes: the UK Biobank	Fall et al. (2018) [18]	CAD+DM vs DM	CAD	rs2023938	C	HDAC9	1.01	0.93	1.1
Genome-wide association study of coronary artery disease among individuals with diabetes: the UK Biobank	Fall et al. (2018) [18]	CAD+DM vs non-DM	CAD	rs2023938	C	HDAC9	1.07	1.04	1.11
Identification of 64 Novel Genetic Loci Provides an Expanded View on the Genetic Architecture of Coronary Artery Disease	van der Harst and Verweij (2018) [15]		CAD	rs2023938	C	HDAC9(0)	1.07821	1.05645	1.10041	3.693e-13
Shared genetic susceptibility to ischemic stroke and coronary artery disease: a genome-wide analysis of common variants	Dichgans et al. (2014) [32]		CAD	rs2047009	G	CXCL12	0.943396	0.917431	0.970874	4.79e-06
Genome-wide association study of coronary artery disease among individuals with diabetes: the UK Biobank	Fall et al. (2018) [18]	CAD+DM vs DM	CAD	rs2047009	G	CXCL12	1.03	0.98	1.09
Genome-wide association study of coronary artery disease among individuals with diabetes: the UK Biobank	Fall et al. (2018) [18]	CAD+DM vs non-DM	CAD	rs2047009	G	CXCL12	1.04	1.02	1.06
Novel risk genes identified in a genome-wide association study for coronary artery disease in patients with type 1 diabetes	Charmet et al. (2018) [30]	Discovery stage only	CAD in T1DM	rs2048327	C	SLC22A3	1	0.841751	1.17096	0.538
Shared genetic susceptibility to ischemic stroke and coronary artery disease: a genome-wide analysis of common variants	Dichgans et al. (2014) [32]		CAD	rs2048327	C	SLC22A3/LPAL2/LPA	1.07	1.05	1.1	1.34e-06
Genome-wide association study of coronary artery disease among individuals with diabetes: the UK Biobank	Fall et al. (2018) [18]	CAD+DM vs DM	CAD	rs2048327	C	SLC22A3-LPAL2-LPA	1.08	1.02	1.14
Genome-wide association study of coronary artery disease among individuals with diabetes: the UK Biobank	Fall et al. (2018) [18]	CAD+DM vs non-DM	CAD	rs2048327	C	SLC22A3-LPAL2-LPA	1.07	1.05	1.1
Genome-wide association study identifies a missense variant at APOA5 for coronary artery disease in Multi-Ethnic Cohorts from Southeast Asia	Han et al. (2017) [36]	Discovery & validation stages	CAD	rs2048327	C	SLC22A3-LPAL2-LPA	1.05	0.98	1.13	0.136
Identification of 13 novel susceptibility loci for early-onset myocardial infarction, hypertension, or chronic kidney disease	Yamada et al. (2018a) [62]		MI	rs2072134	T	OAS3	1.71	1.14	2.55	0.0093
Identification of 26 novel loci that confer susceptibility to early-onset coronary artery disease in a Japanese population	Yamada et al. (2018b) [63]		Early-onset CAD	rs2072134	T	OAS3	1.51	1.05	2.16	0.0268
A genome-wide association study of a coronary artery disease risk variant	Lee et al. (2013) [42]		CAD	rs2074356	T	C12orf51	1.42	1.28	1.58	6.73e-11
Identification of 13 novel susceptibility loci for early-onset myocardial infarction, hypertension, or chronic kidney disease	Yamada et al. (2018a) [62]		MI	rs2074356	T	HECTD4	2.48	1.87	3.28	0.0001
Identification of 26 novel loci that confer susceptibility to early-onset coronary artery disease in a Japanese population	Yamada et al. (2018b) [63]		Early-onset CAD	rs2074356	T	HECTD4	1.76	1.38	2.26	0.0001
Novel risk genes identified in a genome-wide association study for coronary artery disease in patients with type 1 diabetes	Charmet et al. (2018) [30]	Discovery stage only	CAD in T1DM	rs2075650	G	TOMM40	1.35135	1.08814	1.67785	0.003
Genome-wide association study of coronary artery disease among individuals with diabetes: the UK Biobank	Fall et al. (2018) [18]	CAD+DM vs DM	CAD	rs2075650	G	APOE-APOC1	1.11	1.03	1.2
Genome-wide association study of coronary artery disease among individuals with diabetes: the UK Biobank	Fall et al. (2018) [18]	CAD+DM vs non-DM	CAD	rs2075650	G	APOE-APOC1	1.09	1.06	1.12
Genome-wide association study identifies a missense variant at APOA5 for coronary artery disease in Multi-Ethnic Cohorts from Southeast Asia	Han et al. (2017) [36]	Discovery & validation stages	CAD	rs2075650	G	APOE-APOC1	1.14	1.02	1.29	0.0231
Novel risk genes identified in a genome-wide association study for coronary artery disease in patients with type 1 diabetes	Charmet et al. (2018) [30]	Discovery stage only	CAD in T1DM	rs2107595	A	HDAC9	1.14	0.926	1.406	0.106
Shared genetic susceptibility to ischemic stroke and coronary artery disease: a genome-wide analysis of common variants	Dichgans et al. (2014) [32]		CAD	rs2107595	A	HDAC9	1.05	1.01	1.09	0.0419
Genome-wide association study identifies a missense variant at APOA5 for coronary artery disease in Multi-Ethnic Cohorts from Southeast Asia	Han et al. (2017) [36]	Discovery & validation stages	CAD	rs2107595	A	HDAC9	1.05	0.98	1.13	0.164
Transethnic Meta-analysis of Genome-wide Association Studies Identifies Three New Loci and Characterizes Population-specific Differences for Coronary Artery Disease	Matsunaga et al. (2020) [16]	Japanese GWAS, UK Biobank & CARDIoGRAMplusC4D	CAD	rs2107595	A	HDAC9-TWIST1	1.07	1.05	1.09	1.34e-14
Association analyses based on false discovery rate implicate new loci for coronary artery disease.	Nelson et al. (2017) [46]		CAD	rs2107595	A	HDAC9	1.08	1.06	1.1	3.29e-13
A comprehensive 1,000 Genomes-based genome-wide association meta-analysis of coronary artery disease	Nikpay et al. (2015) [5]		CAD	rs2107595	A	HDAC9	1.08	1.05	1.1	8.05e-11
Identification of 64 Novel Genetic Loci Provides an Expanded View on the Genetic Architecture of Coronary Artery Disease	van der Harst and Verweij (2018) [15]		CAD	rs2107595	A	.	1.08491	1.06803	1.10206	3.825e-24
A comprehensive 1,000 Genomes-based genome-wide association meta-analysis of coronary artery disease	Nikpay et al. (2015) [5]		CAD	rs2128739	A	PDGFD	1.07	1.05	1.09	7.05e-11
Identification of 64 Novel Genetic Loci Provides an Expanded View on the Genetic Architecture of Coronary Artery Disease	van der Harst and Verweij (2018) [15]		CAD	rs2128739	A	-	1.0767	1.06224	1.09136	5.76e-27
Association analyses based on false discovery rate implicate new loci for coronary artery disease.	Nelson et al. (2017) [46]		CAD	rs2153219	A	ZC3H12D	1.05263	1.03093	1.07527	2.55e-06
Identification of 64 Novel Genetic Loci Provides an Expanded View on the Genetic Architecture of Coronary Artery Disease	van der Harst and Verweij (2018) [15]		CAD	rs2153219	A	.	1.04383	1.02639	1.06158	6.52e-07
Novel risk genes identified in a genome-wide association study for coronary artery disease in patients with type 1 diabetes	Charmet et al. (2018) [30]	Discovery stage only	CAD in T1DM	rs216172	C	SMG6	1.13	0.963	1.329	0.067
Genome-wide association study of coronary artery disease among individuals with diabetes: the UK Biobank	Fall et al. (2018) [18]	CAD+DM vs DM	CAD	rs216172	C	SMG6	1.01	0.96	1.07
Genome-wide association study of coronary artery disease among individuals with diabetes: the UK Biobank	Fall et al. (2018) [18]	CAD+DM vs non-DM	CAD	rs216172	C	SMG6	1.03	1.01	1.05
Genome-wide association study identifies a missense variant at APOA5 for coronary artery disease in Multi-Ethnic Cohorts from Southeast Asia	Han et al. (2017) [36]	Discovery & validation stages	CAD	rs216172	C	SMG6	1.04	0.96	1.12	0.346
A genome-wide association study of a coronary artery disease risk variant	Lee et al. (2013) [42]		CAD	rs216172	C	SMG6-SRR	1.11	1.01	1.21	0.02
Association between a genetic variant related to glutamic acid metabolism and coronary heart disease in individuals with type 2 diabetes	Qi et al. (2013) [11]	Stage 1 and 2	CHD	rs216172	C	SMG6, SRR	0.97	0.85	1.11	0.62
Large-scale association analysis identifies 13 new susceptibility loci for coronary artery disease	Schunkert et al. (2011) [52]	CARDIoGRAM and replication	CAD	rs216172	C	SMG6,SRR	1.07	1.05	1.09	1.15e-09
SNPs on chromosome 5p15.3 associated with myocardial infarction in Japanese population	Aoki et al. (2011) [14]	Stage 2 only	MI	rs220702	C		1.16456	1.01409	1.33735	0.031
Genome-wide association study of perioperative myocardial infarction after coronary artery bypass surgery	Kertai et al. (2015) [40]		Peri-op MI after CABG	rs220702	C	GPR116	0.462749	0.309502	0.691563	0.0001718
Transethnic Meta-analysis of Genome-wide Association Studies Identifies Three New Loci and Characterizes Population-specific Differences for Coronary Artery Disease	Matsunaga et al. (2020) [16]	Japanese GWAS, UK Biobank & CARDIoGRAMplusC4D	CAD	rs2241714	T	TMEM91	1.05	1.04	1.07	3.69e-11
Identification of 64 Novel Genetic Loci Provides an Expanded View on the Genetic Architecture of Coronary Artery Disease	van der Harst and Verweij (2018) [15]		CAD	rs2241714	T	B9D2(0)|TGFB1(+9.554kb)|TMEM91(-0.478kb)	1.04613	1.03228	1.06017	4.219e-11
Genetic analysis in UK Biobank links insulin resistance and transendothelial migration pathways to coronary artery disease	Klarin et al. (2017) [41]	UK Biobank & Stage 3	CAD	rs2244608	G	HNF1A	1.05	1.03	1.07	2.41e-08
Transethnic Meta-analysis of Genome-wide Association Studies Identifies Three New Loci and Characterizes Population-specific Differences for Coronary Artery Disease	Matsunaga et al. (2020) [16]	Japanese GWAS, UK Biobank & CARDIoGRAMplusC4D	CAD	rs2244608	G	HNF1A	1.05	1.03	1.06	1.99e-08
Association analyses based on false discovery rate implicate new loci for coronary artery disease.	Nelson et al. (2017) [46]		CAD	rs2244608	G	HNF1A	1.053	1.035	1.07	7.74e-10
Identification of 64 Novel Genetic Loci Provides an Expanded View on the Genetic Architecture of Coronary Artery Disease	van der Harst and Verweij (2018) [15]		CAD	rs2244608	G	HNF1A(0)|HNF1A-AS1(+6.893kb)	1.05317	1.04126	1.06521	7.267e-19
Shared genetic susceptibility to ischemic stroke and coronary artery disease: a genome-wide analysis of common variants	Dichgans et al. (2014) [32]		CAD	rs2246833	T	LIPA	1.07	1.04	1.1	5.28e-05
A genome-wide association study identifies LIPA as a susceptibility gene for coronary artery disease	Wild et al. (2011) [60]	GWAS, Replication 1 & 2	CAD	rs2246833	T	LIPA	1.1	1.06	1.14	4.35e-08
Association analyses based on false discovery rate implicate new loci for coronary artery disease.	Nelson et al. (2017) [46]		CAD	rs2246942	G	LIPA	1.08	1.06	1.1	2.83e-16
Identification of 64 Novel Genetic Loci Provides an Expanded View on the Genetic Architecture of Coronary Artery Disease	van der Harst and Verweij (2018) [15]		CAD	rs2246942	G	LIPA(0)	1.07315	1.05874	1.08776	2.155e-24
Novel risk genes identified in a genome-wide association study for coronary artery disease in patients with type 1 diabetes	Charmet et al. (2018) [30]	Discovery stage only	CAD in T1DM	rs2252641	C	ZEB2	1.01	0.867	1.186	0.43
Shared genetic susceptibility to ischemic stroke and coronary artery disease: a genome-wide analysis of common variants	Dichgans et al. (2014) [32]		CAD	rs2252641	C	ZEB2-AC074093.1	1.06	1.03	1.09	1.19e-05
Genome-wide association study of coronary artery disease among individuals with diabetes: the UK Biobank	Fall et al. (2018) [18]	CAD+DM vs DM	CAD	rs2252641	C	ZEB2-ACO74093.1	1.01	0.96	1.06
Genome-wide association study of coronary artery disease among individuals with diabetes: the UK Biobank	Fall et al. (2018) [18]	CAD+DM vs non-DM	CAD	rs2252641	C	ZEB2-ACO74093.1	1.03	1.01	1.05
Genome-wide association study identifies a missense variant at APOA5 for coronary artery disease in Multi-Ethnic Cohorts from Southeast Asia	Han et al. (2017) [36]	Discovery & validation stages	CAD	rs2252641	C	ZEB2-ACO74093.1	1.03	0.94	1.11	0.55
A genome-wide association study identifies PLCL2 and AP3D1-DOT1L-SF3A2 as new susceptibility loci for myocardial infarction in Japanese	Hirokawa et al. (2015) [19]		MI	rs2252641	C	ZEB2-AC074093.1	1	0.9	1.11	0.977
Identification of 64 Novel Genetic Loci Provides an Expanded View on the Genetic Architecture of Coronary Artery Disease	van der Harst and Verweij (2018) [15]		CAD	rs2252641	C	TEX41(0)	1.03749	1.02717	1.04791	5.408e-13
Transethnic Meta-analysis of Genome-wide Association Studies Identifies Three New Loci and Characterizes Population-specific Differences for Coronary Artery Disease	Matsunaga et al. (2020) [16]	Japanese GWAS, UK Biobank & CARDIoGRAMplusC4D	CAD	rs2257129	C	WDR11-FGFR2	1.08	1.05	1.11	3.95e-08
Association analyses based on false discovery rate implicate new loci for coronary artery disease.	Nelson et al. (2017) [46]		CAD	rs2257129	C	WDR11	1.1	1.06	1.14	1.97e-06
Identification of 64 Novel Genetic Loci Provides an Expanded View on the Genetic Architecture of Coronary Artery Disease	van der Harst and Verweij (2018) [15]		CAD	rs2257129	C	.	1.08709	1.05229	1.12304	5.144e-07
New susceptibility locus for coronary artery disease on chromosome 3q22.3	Erdmann et al. (2009) [33]	Stage 1	CAD	rs2259816		HNF1A-C12orf43	1.08	1.05	1.11	4.81e-07
Association between a genetic variant related to glutamic acid metabolism and coronary heart disease in individuals with type 2 diabetes	Qi et al. (2013) [11]	Stage 1 and 2	CHD	rs2259816	T	HNF1A	1.16	1.01	1.33	0.03
A genome-wide association study identifies PLCL2 and AP3D1-DOT1L-SF3A2 as new susceptibility loci for myocardial infarction in Japanese	Hirokawa et al. (2015) [19]		MI	rs2306374	T	MRAS	1	0.86	1.16	0.999
A genome-wide association study of a coronary artery disease risk variant	Lee et al. (2013) [42]		CAD	rs2306374	T	MRAS	0.97	1.05	1.11	0.84
Large-scale association analysis identifies 13 new susceptibility loci for coronary artery disease	Schunkert et al. (2011) [52]	CARDIoGRAM only	CAD	rs2306374	T	MRAS	0.892857	0.862069	0.934579	3.34e-08
Identification of 64 Novel Genetic Loci Provides an Expanded View on the Genetic Architecture of Coronary Artery Disease	van der Harst and Verweij (2018) [15]		CAD	rs2306374	T	MRAS(0)	0.92988	0.914337	0.945687	2.096e-17
A comprehensive 1,000 Genomes-based genome-wide association meta-analysis of coronary artery disease	Nikpay et al. (2015) [5]		CAD	rs2315065	A	PLG	1.33	1.27	1.4	2.88e-34
LPA Variants are Associated with Residual Cardiovascular Risk in Patients Receiving Statins	Wei et al. (2018) [59]	Validation stage only	CHD during statin therapy	rs2315065	A	LPA/PLG	1.44	0.98	2.14	0.066
LPA Variants are Associated with Residual Cardiovascular Risk in Patients Receiving Statins	Wei et al. (2018) [59]	Discovery stage only	CHD during statin therapy	rs2315065	A	LPA/PLG	1.53	1.31	1.78	2.6e-08
Transethnic Meta-analysis of Genome-wide Association Studies Identifies Three New Loci and Characterizes Population-specific Differences for Coronary Artery Disease	Matsunaga et al. (2020) [16]	Japanese GWAS only	CAD	rs2327429	T	TCF21	1.14	1.1	1.18	1.09e-12
Identification of 64 Novel Genetic Loci Provides an Expanded View on the Genetic Architecture of Coronary Artery Disease	van der Harst and Verweij (2018) [15]		CAD	rs2327429	T	EYA4-AS1(0)|TCF21(-0.421kb)	1.07498	1.06199	1.08812	3.213e-31
SNPs on chromosome 5p15.3 associated with myocardial infarction in Japanese population	Aoki et al. (2011) [14]	Stage 2 only	MI	rs2383206	G		1.11239	1.00167	1.23534	0.048
Genome-wide association study identifies a missense variant at APOA5 for coronary artery disease in Multi-Ethnic Cohorts from Southeast Asia	Han et al. (2017) [36]	Discovery stage only	CAD	rs2383206	G	CDKN2B-AS1	1.213	1.13852	1.28748	3.72e-07
A genome-wide association study of a coronary artery disease risk variant	Lee et al. (2013) [42]		CAD	rs2383206	G		1.26	1.16	1.36	2.11e-08
A common allele on chromosome 9 associated with coronary heart disease	McPherson et al. (2007) [45]		CAD	rs2383206	G		1.2392	1.1814	1.2997	0.0001
Genome-wide association study identifies a missense variant at APOA5 for coronary artery disease in Multi-Ethnic Cohorts from Southeast Asia	Han et al. (2017) [36]	Discovery stage only	CAD	rs2383207	G	CDKN2B-AS1	1.206	1.1276	1.2844	2.35e-06
A common variant on chromosome 9p21 affects the risk of myocardial infarction	Helgadottir et al. (2007) [37]		MI	rs2383207	G	CDKN2A/2B	1.25	1.18	1.31	2e-16
Identification of 26 novel loci that confer susceptibility to early-onset coronary artery disease in a Japanese population	Yamada et al. (2018b) [63]		Early-onset CAD	rs2383207	G	CDKN2BAS1	1.33333	1.05263	1.69492	0.0171
Novel risk genes identified in a genome-wide association study for coronary artery disease in patients with type 1 diabetes	Charmet et al. (2018) [30]	Discovery stage only	CAD in T1DM	rs246600	T	ARHGAP26	0.98	0.839	1.155	0.575
Identification of 64 Novel Genetic Loci Provides an Expanded View on the Genetic Architecture of Coronary Artery Disease	van der Harst and Verweij (2018) [15]		CAD	rs246600	T	ARHGAP26(0)	1.04917	1.03772	1.06075	2.078e-17
Novel risk genes identified in a genome-wide association study for coronary artery disease in patients with type 1 diabetes	Charmet et al. (2018) [30]	Discovery stage only	CAD in T1DM	rs2487928	A	KIAA1462	1.08	0.924	1.271	0.161
A comprehensive 1,000 Genomes-based genome-wide association meta-analysis of coronary artery disease	Nikpay et al. (2015) [5]		CAD	rs2487928	A	KIAA1462	1.06	1.04	1.08	4.41e-11
Identification of 64 Novel Genetic Loci Provides an Expanded View on the Genetic Architecture of Coronary Artery Disease	van der Harst and Verweij (2018) [15]		CAD	rs2487928	A	KIAA1462(0)	1.05612	1.04295	1.06945	1.963e-17
Shared genetic susceptibility to ischemic stroke and coronary artery disease: a genome-wide analysis of common variants	Dichgans et al. (2014) [32]		CAD	rs2505083	C	KIAA1462	1.07	1.04	1.1	2.4e-05
Genome-wide association study of coronary artery disease among individuals with diabetes: the UK Biobank	Fall et al. (2018) [18]	CAD+DM vs DM	CAD	rs2505083	C	KIAA1462	1.02	0.97	1.08
Genome-wide association study of coronary artery disease among individuals with diabetes: the UK Biobank	Fall et al. (2018) [18]	CAD+DM vs non-DM	CAD	rs2505083	C	KIAA1462	1.04	1.02	1.06
A genome-wide association study identifies PLCL2 and AP3D1-DOT1L-SF3A2 as new susceptibility loci for myocardial infarction in Japanese	Hirokawa et al. (2015) [19]		MI	rs2505083	C	KIAA1462	0.96	0.86	1.08	0.531
A genome-wide association study in europeans and South asians identifies five new loci for coronary artery disease	Peden et al. (2011) [49]		CAD	rs2505083	C	KIAA1462	1.07	1.04	1.09	3.87e-08
Association between a genetic variant related to glutamic acid metabolism and coronary heart disease in individuals with type 2 diabetes	Qi et al. (2013) [11]	Stage 1 and 2	CHD	rs2505083	C	KIAA1462	1.01	0.89	1.15	0.83
Novel risk genes identified in a genome-wide association study for coronary artery disease in patients with type 1 diabetes	Charmet et al. (2018) [30]	Discovery stage only	CAD in T1DM	rs2519093	T	ABO	0.98	0.8	1.203	0.571
A comprehensive 1,000 Genomes-based genome-wide association meta-analysis of coronary artery disease	Nikpay et al. (2015) [5]		CAD	rs2519093	T	ABO	1.08	1.06	1.11	1.19e-11
Identification of 64 Novel Genetic Loci Provides an Expanded View on the Genetic Architecture of Coronary Artery Disease	van der Harst and Verweij (2018) [15]		CAD	rs2519093	T	ABO(0)	1.06769	1.05088	1.08478	4.271e-16
Identification of 13 novel susceptibility loci for early-onset myocardial infarction, hypertension, or chronic kidney disease	Yamada et al. (2018a) [62]		MI	rs2523644	G	-	1.76	1.42	2.17	0.0001
Identification of 26 novel loci that confer susceptibility to early-onset coronary artery disease in a Japanese population	Yamada et al. (2018b) [63]		Early-onset CAD	rs2523644	G	-	1.59	1.31	1.92	0.0001
Novel risk genes identified in a genome-wide association study for coronary artery disease in patients with type 1 diabetes	Charmet et al. (2018) [30]	Discovery stage only	CAD in T1DM	rs2571445	A	TNS1	1.05	0.894	1.234	0.275
Identification of 64 Novel Genetic Loci Provides an Expanded View on the Genetic Architecture of Coronary Artery Disease	van der Harst and Verweij (2018) [15]		CAD	rs2571445	A	TNS1(0)	1.04185	1.03028	1.05356	9.8e-13
Identification of 13 novel susceptibility loci for early-onset myocardial infarction, hypertension, or chronic kidney disease	Yamada et al. (2018a) [62]		MI	rs2596548	T	-	2.04	1.6	2.61	0.0001
Identification of 26 novel loci that confer susceptibility to early-onset coronary artery disease in a Japanese population	Yamada et al. (2018b) [63]		Early-onset CAD	rs2596548	T	-	1.76	1.41	2.2	0.0001
Association analyses based on false discovery rate implicate new loci for coronary artery disease.	Nelson et al. (2017) [46]		CAD	rs2616407	C	LNX1	1.05	1.03	1.07	4.5e-06
Identification of 64 Novel Genetic Loci Provides an Expanded View on the Genetic Architecture of Coronary Artery Disease	van der Harst and Verweij (2018) [15]		CAD	rs2616407	C	.	1.03884	1.02227	1.05567	3.337e-06
Novel risk genes identified in a genome-wide association study for coronary artery disease in patients with type 1 diabetes	Charmet et al. (2018) [30]	Discovery stage only	CAD in T1DM	rs264	G	LPL	0.94	0.756	1.168	0.711
Shared genetic susceptibility to ischemic stroke and coronary artery disease: a genome-wide analysis of common variants	Dichgans et al. (2014) [32]		CAD	rs264	G	LPL	1.11111	1.06383	1.14943	2.92e-07
Genome-wide association study of coronary artery disease among individuals with diabetes: the UK Biobank	Fall et al. (2018) [18]	CAD+DM vs non-DM	CAD	rs264	G	LPL	1.06	1.03	1.09
Genome-wide association study of coronary artery disease among individuals with diabetes: the UK Biobank	Fall et al. (2018) [18]	CAD+DM vs DM	CAD	rs264	G	LPL	1.12	1.03	1.21
A genome-wide association study identifies PLCL2 and AP3D1-DOT1L-SF3A2 as new susceptibility loci for myocardial infarction in Japanese	Hirokawa et al. (2015) [19]		MI	rs264	G	LPL	1.01	0.91	1.12	0.892
Identification of 64 Novel Genetic Loci Provides an Expanded View on the Genetic Architecture of Coronary Artery Disease	van der Harst and Verweij (2018) [15]		CAD	rs264	G	LPL(0)	1.06524	1.0462	1.08462	5.744e-12
Genome-wide association study identifies a missense variant at APOA5 for coronary artery disease in Multi-Ethnic Cohorts from Southeast Asia	Han et al. (2017) [36]	Discovery & validation stages	CAD	rs2681472	G	ATP2B1	1.04	0.97	1.12	0.289
Association analyses based on false discovery rate implicate new loci for coronary artery disease.	Nelson et al. (2017) [46]		CAD	rs2681472	G	ATP2B1	1.07	1.05	1.09	5.99e-11
A comprehensive 1,000 Genomes-based genome-wide association meta-analysis of coronary artery disease	Nikpay et al. (2015) [5]		CAD	rs2681472	G	ATP2B1	1.08	1.05	1.1	6.17e-11
Association analyses based on false discovery rate implicate new loci for coronary artery disease.	Nelson et al. (2017) [46]		CAD	rs2727020	C	TRIM64C	1.04167	1.02041	1.06383	8.6e-06
Identification of 64 Novel Genetic Loci Provides an Expanded View on the Genetic Architecture of Coronary Artery Disease	van der Harst and Verweij (2018) [15]		CAD	rs2727020	C	.	1.03149	1.01763	1.04553	7.572e-06
Novel risk genes identified in a genome-wide association study for coronary artery disease in patients with type 1 diabetes	Charmet et al. (2018) [30]	Discovery stage only	CAD in T1DM	rs273909	G	SLC22A4	0.94	0.726	1.217	0.68
Shared genetic susceptibility to ischemic stroke and coronary artery disease: a genome-wide analysis of common variants	Dichgans et al. (2014) [32]		CAD	rs273909	G	SLC22A4-SLC22A5	1.07	1.02	1.11	0.00823
Genome-wide association study of coronary artery disease among individuals with diabetes: the UK Biobank	Fall et al. (2018) [18]	CAD+DM vs DM	CAD	rs273909	G	SLC22A4-SLC22A5	1.02	0.94	1.1
Genome-wide association study of coronary artery disease among individuals with diabetes: the UK Biobank	Fall et al. (2018) [18]	CAD+DM vs non-DM	CAD	rs273909	G	SLC22A4-SLC22A5	1.02	0.99	1.05
Genome-wide association study identifies a missense variant at APOA5 for coronary artery disease in Multi-Ethnic Cohorts from Southeast Asia	Han et al. (2017) [36]	Discovery & validation stages	CAD	rs273909	G	SLC22A4-SLC22A5	0.97	0.84	1.13	0.704
A comprehensive 1,000 Genomes-based genome-wide association meta-analysis of coronary artery disease	Nikpay et al. (2015) [5]		CAD	rs273909	G	SLC22A4-SLC22A5	1.06	1.03	1.09	0.000124
Identification of 64 Novel Genetic Loci Provides an Expanded View on the Genetic Architecture of Coronary Artery Disease	van der Harst and Verweij (2018) [15]		CAD	rs273909	G	LOC553103(0)|SLC22A4(0)	1.05485	1.03742	1.07257	3.23e-10
Association analyses based on false discovery rate implicate new loci for coronary artery disease.	Nelson et al. (2017) [46]		CAD	rs2789422	A	TAGLN2	0.96	0.95	0.98	2.38e-05
Identification of 64 Novel Genetic Loci Provides an Expanded View on the Genetic Architecture of Coronary Artery Disease	van der Harst and Verweij (2018) [15]		CAD	rs2789422	A	IGSF9(-4.74kb)|TAGLN2(0)	0.971319	0.958835	0.983966	1.036e-05
Novel risk genes identified in a genome-wide association study for coronary artery disease in patients with type 1 diabetes	Charmet et al. (2018) [30]	Discovery stage only	CAD in T1DM	rs2820315	T	LMOD1	0.82	0.156	0.97	0.618
Association analyses based on false discovery rate implicate new loci for coronary artery disease.	Nelson et al. (2017) [46]		CAD	rs2820315	T	LMOD1	1.04	1.03	1.06	2.06e-06
Identification of 64 Novel Genetic Loci Provides an Expanded View on the Genetic Architecture of Coronary Artery Disease	van der Harst and Verweij (2018) [15]		CAD	rs2820315	T	LMOD1(0)	1.03655	1.02524	1.04799	1.097e-10
Association analyses based on false discovery rate implicate new loci for coronary artery disease.	Nelson et al. (2017) [46]		CAD	rs2843152	C	SKI	1.04167	1.02041	1.06383	1.32e-05
Identification of 64 Novel Genetic Loci Provides an Expanded View on the Genetic Architecture of Coronary Artery Disease	van der Harst and Verweij (2018) [15]		CAD	rs2843152	C	MORN1(-7.125kb)|SKI(+3.918kb)	1.04144	1.02664	1.05644	3.152e-08
Novel risk genes identified in a genome-wide association study for coronary artery disease in patients with type 1 diabetes	Charmet et al. (2018) [30]	Discovery stage only	CAD in T1DM	rs28451064	A	KCNE2	1.36	1.066	1.751	0.006
Genetic analysis in UK Biobank links insulin resistance and transendothelial migration pathways to coronary artery disease	Klarin et al. (2017) [41]	UK Biobank	CAD	rs28451064	A	KCNE2 - Gene desert (intergenic)	1.18	1.11	1.25	2.1e-08
Association analyses based on false discovery rate implicate new loci for coronary artery disease.	Nelson et al. (2017) [46]		CAD	rs28451064	A	NCRNA00310	1.14	1.11	1.17	2.49e-23
A comprehensive 1,000 Genomes-based genome-wide association meta-analysis of coronary artery disease	Nikpay et al. (2015) [5]		CAD	rs28451064	A	KCNE2 (gene desert)	1.14	1.1	1.17	1.33e-15
Identification of 64 Novel Genetic Loci Provides an Expanded View on the Genetic Architecture of Coronary Artery Disease	van der Harst and Verweij (2018) [15]		CAD	rs28451064	A	-	1.12671	1.10484	1.14901	7.086e-33
Genome-wide association study of perioperative myocardial infarction after coronary artery bypass surgery	Kertai et al. (2015) [40]		Peri-op MI after CABG	rs2880099	A	LOC100287564-GUCY1A3	2.059	1.426	2.974	0.0001162
Identification of 64 Novel Genetic Loci Provides an Expanded View on the Genetic Architecture of Coronary Artery Disease	van der Harst and Verweij (2018) [15]		CAD	rs2880099	A	-	1.06152	1.04234	1.08104	1.464e-10
Association analyses based on false discovery rate implicate new loci for coronary artery disease.	Nelson et al. (2017) [46]		CAD	rs288187	T	FBXL17	0.96	0.93	0.98	2.6e-05
Identification of 64 Novel Genetic Loci Provides an Expanded View on the Genetic Architecture of Coronary Artery Disease	van der Harst and Verweij (2018) [15]		CAD	rs288187	T	FBXL17(0)	0.968603	0.952787	0.984683	0.0001602
Novel risk genes identified in a genome-wide association study for coronary artery disease in patients with type 1 diabetes	Charmet et al. (2018) [30]	Discovery stage only	CAD in T1DM	rs2891168	G	CDKN2BAS1	1.16	0.993	1.362	0.03
Genome-wide association study identifies a new locus for coronary artery disease on chromosome 10p11.23	Erdmann et al. (2011) [34]	Stages 1	CAD	rs2891168	G		1.24	1.11	1.38	0.000141
Genome-wide association study identifies a new locus for coronary artery disease on chromosome 10p11.23	Erdmann et al. (2011) [34]	Stage 2 GerMIFS II	CAD	rs2891168	G		1.3	1.16	1.5	4.42e-06
Genome-wide association study identifies a new locus for coronary artery disease on chromosome 10p11.23	Erdmann et al. (2011) [34]	Stage 2 GerMIFS I	CAD	rs2891168	G		1.36	1.21	1.53	1.32e-07
Genome-wide association study identifies a missense variant at APOA5 for coronary artery disease in Multi-Ethnic Cohorts from Southeast Asia	Han et al. (2017) [36]	Discovery stage only	CAD	rs2891168	G	CDKN2B-AS1	1.222	1.14752	1.29648	1.31e-07
A genome-wide association study of a coronary artery disease risk variant	Lee et al. (2013) [42]		CAD	rs2891168	G	CDKN2BAS	1.25	1.16	1.36	1.83e-08
Association analyses based on false discovery rate implicate new loci for coronary artery disease.	Nelson et al. (2017) [46]		CAD	rs2891168	G	CDKN2B-AS1	1.19	1.17	1.21	1.51e-101
A comprehensive 1,000 Genomes-based genome-wide association meta-analysis of coronary artery disease	Nikpay et al. (2015) [5]		CAD	rs2891168	G	9p21	1.21	1.19	1.24	2.29e-98
Genomewide association analysis of coronary artery disease	Samani et al. (2007) [51]	WTCC & German MI Family Study	CAD+MI	rs2891168	G		1.35	1.26	1.44	1.34e-18
Identification of 64 Novel Genetic Loci Provides an Expanded View on the Genetic Architecture of Coronary Artery Disease	van der Harst and Verweij (2018) [15]		CAD	rs2891168	G	CDKN2B-AS1(0)	1.20816	1.19357	1.22293	5.19e-204
A genome-wide association study identifies LIPA as a susceptibility gene for coronary artery disease	Wild et al. (2011) [60]	GWAS & Replication 1	CAD	rs2891168	G	intergenic	1.3	1.26	1.35	1.48e-45
Shared genetic susceptibility to ischemic stroke and coronary artery disease: a genome-wide analysis of common variants	Dichgans et al. (2014) [32]		CAD	rs2895811	C	HHIPL1	1.09	1.06	1.13	1.18e-05
Genome-wide association study of coronary artery disease among individuals with diabetes: the UK Biobank	Fall et al. (2018) [18]	CAD+DM vs DM	CAD	rs2895811	C	HHIPL1	1.02	0.97	1.08
Genome-wide association study of coronary artery disease among individuals with diabetes: the UK Biobank	Fall et al. (2018) [18]	CAD+DM vs non-DM	CAD	rs2895811	C	HHIPL1	1.03	1.01	1.05
Genome-wide association study identifies a missense variant at APOA5 for coronary artery disease in Multi-Ethnic Cohorts from Southeast Asia	Han et al. (2017) [36]	Discovery & validation stages	CAD	rs2895811	C	HHIPL1	1.01	0.93	1.09	0.789
Association between a genetic variant related to glutamic acid metabolism and coronary heart disease in individuals with type 2 diabetes	Qi et al. (2013) [11]	Stage 1 and 2	CHD	rs2895811	C	HHIPL1	0.92	0.81	1.05	0.23
Large-scale association analysis identifies 13 new susceptibility loci for coronary artery disease	Schunkert et al. (2011) [52]	CARDIoGRAM and replication	CAD	rs2895811	C	HHIPL1	1.07	1.05	1.1	1.14e-10
Identification of 64 Novel Genetic Loci Provides an Expanded View on the Genetic Architecture of Coronary Artery Disease	van der Harst and Verweij (2018) [15]		CAD	rs2895811	C	HHIPL1(0)|MIR5698(-6.276kb)	1.04519	1.03358	1.05693	9.773e-15
Genome-wide association of early-onset myocardial infarction with single nucleotide polymorphisms and copy number variants	Kathiresan et al. (2009) [39]		Early-onset MI	rs2943634	C	-	0.94	0.9	0.98	0.01
Genomewide association analysis of coronary artery disease	Samani et al. (2007) [51]	WTCC & German MI Family Study	CAD+MI	rs2943634	C		1.21	1.13	1.3	1.61e-07
Identification of 64 Novel Genetic Loci Provides an Expanded View on the Genetic Architecture of Coronary Artery Disease	van der Harst and Verweij (2018) [15]		CAD	rs2943634	C	.	1.04175	1.02796	1.05573	1.51e-09
Novel risk genes identified in a genome-wide association study for coronary artery disease in patients with type 1 diabetes	Charmet et al. (2018) [30]	Discovery stage only	CAD in T1DM	rs2954029	A	TRIB1	1.05	0.896	1.232	0.269
Shared genetic susceptibility to ischemic stroke and coronary artery disease: a genome-wide analysis of common variants	Dichgans et al. (2014) [32]		CAD	rs2954029	A	TRIB1	1.06383	1.03093	1.08696	1.28e-05
Genome-wide association study of coronary artery disease among individuals with diabetes: the UK Biobank	Fall et al. (2018) [18]	CAD+DM vs DM	CAD	rs2954029	A	TRIB1	1.02	0.97	1.08
Genome-wide association study of coronary artery disease among individuals with diabetes: the UK Biobank	Fall et al. (2018) [18]	CAD+DM vs non-DM	CAD	rs2954029	A	TRIB1	1.05	1.03	1.07
Genome-wide association study identifies a missense variant at APOA5 for coronary artery disease in Multi-Ethnic Cohorts from Southeast Asia	Han et al. (2017) [36]	Discovery & validation stages	CAD	rs2954029	A	TRIB1	1.02041	0.952381	1.08696	0.583
Association analyses based on false discovery rate implicate new loci for coronary artery disease.	Nelson et al. (2017) [46]		CAD	rs2954029	A	TRIB1	1.06	1.04	1.08	5.06e-13
Identification of 64 Novel Genetic Loci Provides an Expanded View on the Genetic Architecture of Coronary Artery Disease	van der Harst and Verweij (2018) [15]		CAD	rs2954029	A	.	1.06887	1.05554	1.08236	1.373e-25
Genetic analysis in UK Biobank links insulin resistance and transendothelial migration pathways to coronary artery disease	Klarin et al. (2017) [41]	UK Biobank & Stage 2	CAD	rs2972146	T	LOC646736 (Intergenic)	1.06	1.04	1.07	1.46e-09
Association analyses based on false discovery rate implicate new loci for coronary artery disease.	Nelson et al. (2017) [46]		CAD	rs2972146	T	IRS1	1.05	1.03	1.07	1.24e-07
Novel risk genes identified in a genome-wide association study for coronary artery disease in patients with type 1 diabetes	Charmet et al. (2018) [30]	Discovery stage only	CAD in T1DM	rs3130683	T	C2	0.69	0.455	1.034	0.964
Association analyses based on false discovery rate implicate new loci for coronary artery disease.	Nelson et al. (2017) [46]		CAD	rs3130683	T	C2	1.08	1.05	1.11	2.31e-08
Identification of 64 Novel Genetic Loci Provides an Expanded View on the Genetic Architecture of Coronary Artery Disease	van der Harst and Verweij (2018) [15]		CAD	rs3130683	T	C2(0)	1.06951	1.04875	1.09068	1.949e-11
Association analyses based on false discovery rate implicate new loci for coronary artery disease.	Nelson et al. (2017) [46]		CAD	rs3133293	T	PAK1	0.96	0.94	0.98	2.94e-06
Identification of 64 Novel Genetic Loci Provides an Expanded View on the Genetic Architecture of Coronary Artery Disease	van der Harst and Verweij (2018) [15]		CAD	rs3133293	T	PAK1(+9.992kb)	0.970251	0.957218	0.983462	1.19e-05
Genome-wide association study of coronary artery disease among individuals with diabetes: the UK Biobank	Fall et al. (2018) [18]	CAD+DM vs DM	CAD	rs3184504	T	SH2B3	1.02	0.97	1.08
Genome-wide association study of coronary artery disease among individuals with diabetes: the UK Biobank	Fall et al. (2018) [18]	CAD+DM vs non-DM	CAD	rs3184504	T	SH2B3	1.07	1.05	1.09
A genome-wide association study in europeans and South asians identifies five new loci for coronary artery disease	Peden et al. (2011) [49]		CAD	rs3184504	T	SH2B3	1.05	1	1.11	0.0661
Large-scale association analysis identifies 13 new susceptibility loci for coronary artery disease	Schunkert et al. (2011) [52]	CARDIoGRAM only	CAD	rs3184504	T	SH2B3	1.07	1.04	1.1	6.35e-06
Identification of 64 Novel Genetic Loci Provides an Expanded View on the Genetic Architecture of Coronary Artery Disease	van der Harst and Verweij (2018) [15]		CAD	rs3184504	T	ATXN2(-5.409kb)|SH2B3(0)	1.07702	1.06339	1.09083	5.144e-30
Novel risk genes identified in a genome-wide association study for coronary artery disease in patients with type 1 diabetes	Charmet et al. (2018) [30]	Discovery stage only	CAD in T1DM	rs3217992	T	CDKN2BAS1	1.08696	0.922509	1.26743	0.169
Shared genetic susceptibility to ischemic stroke and coronary artery disease: a genome-wide analysis of common variants	Dichgans et al. (2014) [32]		CAD	rs3217992	T	CDKN2BAS	1.17	1.14	1.21	2.21e-29
Genome-wide association study of coronary artery disease among individuals with diabetes: the UK Biobank	Fall et al. (2018) [18]	CAD+DM vs DM	CAD	rs3217992	T	9p21	1.12	1.06	1.19
Genome-wide association study of coronary artery disease among individuals with diabetes: the UK Biobank	Fall et al. (2018) [18]	CAD+DM vs non-DM	CAD	rs3217992	T	9p21	1.12	1.1	1.15
NPR-C gene polymorphism is associated with increased susceptibility to coronary artery disease in Chinese Han population: a multicenter study	Hu et al. (2016) [38]	Dis-Shanghai only	CAD	rs328		LPL	1.62	1.05	2.47	0.03259
Transethnic Meta-analysis of Genome-wide Association Studies Identifies Three New Loci and Characterizes Population-specific Differences for Coronary Artery Disease	Matsunaga et al. (2020) [16]	Japanese GWAS, UK Biobank & CARDIoGRAMplusC4D	CAD	rs328	C	LPL	1.07	1.05	1.1	3.35e-08
Association analyses based on false discovery rate implicate new loci for coronary artery disease.	Nelson et al. (2017) [46]		CAD	rs35146811	C	CNPY4	1.04	1.03	1.06	3.19e-06
Identification of 64 Novel Genetic Loci Provides an Expanded View on the Genetic Architecture of Coronary Artery Disease	van der Harst and Verweij (2018) [15]		CAD	rs35146811	C	CNPY4(0)|MBLAC1(-3.325kb)|TAF6(+3.513kb)	1.03427	1.01998	1.04877	2.033e-06
Association analyses based on false discovery rate implicate new loci for coronary artery disease.	Nelson et al. (2017) [46]		CAD	rs35465346	A	LDLRAD2	0.95	0.93	0.97	9.24e-06
Identification of 64 Novel Genetic Loci Provides an Expanded View on the Genetic Architecture of Coronary Artery Disease	van der Harst and Verweij (2018) [15]		CAD	rs35465346	A	LDLRAD2(-6.239kb)	0.960693	0.943895	0.97779	8.929e-06
Association analyses based on false discovery rate implicate new loci for coronary artery disease.	Nelson et al. (2017) [46]		CAD	rs35489971	A	CD300LF	1.05263	1.03093	1.07527	2.35e-06
Identification of 64 Novel Genetic Loci Provides an Expanded View on the Genetic Architecture of Coronary Artery Disease	van der Harst and Verweij (2018) [15]		CAD	rs35489971	A	CD300LF(0)|RAB37(0)	1.04477	1.02791	1.06191	1.096e-07
A comprehensive 1,000 Genomes-based genome-wide association meta-analysis of coronary artery disease	Nikpay et al. (2015) [5]		CAD	rs35895680	C	UBE2Z	1.06	1.04	1.08	3.76e-07
Identification of 64 Novel Genetic Loci Provides an Expanded View on the Genetic Architecture of Coronary Artery Disease	van der Harst and Verweij (2018) [15]		CAD	rs35895680	C	.	1.04592	1.03147	1.06058	3.215e-10
Genome-wide association study identifies a new locus for coronary artery disease on chromosome 10p11.23	Erdmann et al. (2011) [34]	Stages 1,2,3	CAD	rs3739998	G	KIAA1462	1.15	1.11	1.2	1.27e-11
Identification of 64 Novel Genetic Loci Provides an Expanded View on the Genetic Architecture of Coronary Artery Disease	van der Harst and Verweij (2018) [15]		CAD	rs3739998	G	KIAA1462(0)	1.05201	1.03889	1.06529	2.543e-15
Association analyses based on false discovery rate implicate new loci for coronary artery disease.	Nelson et al. (2017) [46]		CAD	rs3782774	G	TSPAN9	1.04	1.02	1.05	2.04e-05
Identification of 64 Novel Genetic Loci Provides an Expanded View on the Genetic Architecture of Coronary Artery Disease	van der Harst and Verweij (2018) [15]		CAD	rs3782774	G	TSPAN9(0)	1.03221	1.01914	1.04544	1.134e-06
SNPs on chromosome 5p15.3 associated with myocardial infarction in Japanese population	Aoki et al. (2011) [14]	Stage 2 only	MI	rs3782886	G		1.43513	1.2793	1.60993	7.6e-10
A genome-wide association study identifies PLCL2 and AP3D1-DOT1L-SF3A2 as new susceptibility loci for myocardial infarction in Japanese	Hirokawa et al. (2015) [19]		MI	rs3782886	G	ALDH2	0.684932	0.625	0.75188	1.14e-14
A genome-wide association study of a coronary artery disease risk variant	Lee et al. (2013) [42]		CAD	rs3782886	G		1.4	1.27	1.55	7.83e-11
Genome-wide association study of coronary artery disease in the Japanese	Takeuchi et al. (2012) [54]		CAD	rs3782886	G	BRAP	1.38	1.31	1.46	6.9e-30
Identification of 13 novel susceptibility loci for early-onset myocardial infarction, hypertension, or chronic kidney disease	Yamada et al. (2018a) [62]		MI	rs3782886	G	BRAP	2.58	1.99	3.35	0.0001
Identification of 26 novel loci that confer susceptibility to early-onset coronary artery disease in a Japanese population	Yamada et al. (2018b) [63]		Early-onset CAD	rs3782886	G	BRAP	1.7	1.36	2.12	0.0001
Novel risk genes identified in a genome-wide association study for coronary artery disease in patients with type 1 diabetes	Charmet et al. (2018) [30]	Discovery stage only	CAD in T1DM	rs3798220	C	LPA	1.35135	0.717875	2.51889	0.178
Genome-wide association study of coronary artery disease among individuals with diabetes: the UK Biobank	Fall et al. (2018) [18]	CAD+DM vs DM	CAD	rs3798220	C	SLC22A3-LPAL2-LPA	1.38	1.16	1.65
Genome-wide association study of coronary artery disease among individuals with diabetes: the UK Biobank	Fall et al. (2018) [18]	CAD+DM vs non-DM	CAD	rs3798220	C	SLC22A3-LPAL2-LPA	1.45	1.36	1.54
A genome-wide association study of a coronary artery disease risk variant	Lee et al. (2013) [42]		CAD	rs3798220	C	LPAd	0.93	1.05	1.11	0.43
Large-scale association analysis identifies 13 new susceptibility loci for coronary artery disease	Schunkert et al. (2011) [52]	Replication only	CAD	rs3798220	C	LPA	1.51	1.33	1.7	3e-11
Identification of 64 Novel Genetic Loci Provides an Expanded View on the Genetic Architecture of Coronary Artery Disease	van der Harst and Verweij (2018) [15]		CAD	rs3798220	C	LPA(0)	1.59776	1.52434	1.67471	5.715e-85
Genome-wide association study for coronary artery calcification with follow-up in myocardial infarction	O'Donnell et al. (2011) [47]		MI	rs3809346	A	COL4A2	1.08763	1.03157	1.14674	0.00199
Identification of 64 Novel Genetic Loci Provides an Expanded View on the Genetic Architecture of Coronary Artery Disease	van der Harst and Verweij (2018) [15]		CAD	rs3809346	A	COL4A1(+1.447kb)|COL4A2(0)	1.05138	1.03949	1.0634	8.894e-18
A genome-wide association study of a coronary artery disease risk variant	Lee et al. (2013) [42]		CAD	rs3825807	A	ADAMTS7	0.94	1.05	1.11	0.1
Association between a genetic variant related to glutamic acid metabolism and coronary heart disease in individuals with type 2 diabetes	Qi et al. (2013) [11]	Stage 1 and 2	CHD	rs3825807	A	ADAMTS7	1.07	0.93	1.22	0.33
Large-scale association analysis identifies 13 new susceptibility loci for coronary artery disease	Schunkert et al. (2011) [52]	CARDIoGRAM and replication	CAD	rs3825807	A	ADAMTS7	1.08	1.06	1.1	1.07e-12
Genome-wide association study of 14,000 cases of seven common diseases and 3,000 shared controls	Burton et al. (2007) [29]		CAD	rs383830	T		1.92	1.4	2.63	1.34e-05
Genomewide association analysis of coronary artery disease	Samani et al. (2007) [51]	German MI Family Study only	MI	rs383830	T		0.94	0.81	1.1	0.45
Genomewide association analysis of coronary artery disease	Samani et al. (2007) [51]	WTCC only	CAD	rs383830	T		1.27	1.14	1.4	5.72e-06
Large-scale association analysis identifies 13 new susceptibility loci for coronary artery disease	Schunkert et al. (2011) [52]	CARDIoGRAM only	CAD	rs383830	T	APC	1.029	0.994	1.064	0.102
Novel risk genes identified in a genome-wide association study for coronary artery disease in patients with type 1 diabetes	Charmet et al. (2018) [30]	Discovery stage only	CAD in T1DM	rs3918226	T	NOS3	0.9	0.672	1.212	0.751
Genome-wide association study of coronary artery disease among individuals with diabetes: the UK Biobank	Fall et al. (2018) [18]	CAD+DM vs DM	CAD	rs3918226	T	NOS3	0.99	0.9	1.1
Genome-wide association study of coronary artery disease among individuals with diabetes: the UK Biobank	Fall et al. (2018) [18]	CAD+DM vs non-DM	CAD	rs3918226	T	NOS3	1.11	1.07	1.15
Association analyses based on false discovery rate implicate new loci for coronary artery disease.	Nelson et al. (2017) [46]		CAD	rs3918226	T	NOS3	1.13	1.09	1.17	1.53e-12
A comprehensive 1,000 Genomes-based genome-wide association meta-analysis of coronary artery disease	Nikpay et al. (2015) [5]		CAD	rs3918226	T	NOS3	1.14	1.09	1.19	1.69e-09
Identification of 64 Novel Genetic Loci Provides an Expanded View on the Genetic Architecture of Coronary Artery Disease	van der Harst and Verweij (2018) [15]		CAD	rs3918226	T	NOS3(0)	1.12964	1.10144	1.15857	3.301e-21
Novel risk genes identified in a genome-wide association study for coronary artery disease in patients with type 1 diabetes	Charmet et al. (2018) [30]	Discovery stage only	CAD in T1DM	rs3993105	T	ARNTL	1.03	0.866	1.228	0.364
Association analyses based on false discovery rate implicate new loci for coronary artery disease.	Nelson et al. (2017) [46]		CAD	rs3993105	T	ARNTL	1.048	1.031	1.066	4.77e-08
Association analyses based on false discovery rate implicate new loci for coronary artery disease.	Nelson et al. (2017) [46]		CAD	rs41272114	T	LPA	0.88	0.84	0.92	8.48e-08
Identification of 64 Novel Genetic Loci Provides an Expanded View on the Genetic Architecture of Coronary Artery Disease	van der Harst and Verweij (2018) [15]		CAD	rs41272114	T	LPA(0)	0.891099	0.861221	0.922013	3.17e-11
Association analyses based on false discovery rate implicate new loci for coronary artery disease.	Nelson et al. (2017) [46]		CAD	rs421329	T	PPP1R3G	0.96	0.94	0.97	9.05e-06
Identification of 64 Novel Genetic Loci Provides an Expanded View on the Genetic Architecture of Coronary Artery Disease	van der Harst and Verweij (2018) [15]		CAD	rs421329	T	PPP1R3G(+2.601kb)	0.966185	0.95134	0.981262	1.474e-05
Genome-wide association study of platelet reactivity and cardiovascular response in patients treated with clopidogrel: a study by the International Clopidogrel Pharmacogenomics Consortium (ICPC)	Verma et al. (2020) [55]		Stent thrombosis	rs4244285	A	CYP2C19*2	0.81	0.39	1.68	0.57
Genome-wide association study of platelet reactivity and cardiovascular response in patients treated with clopidogrel: a study by the International Clopidogrel Pharmacogenomics Consortium (ICPC)	Verma et al. (2020) [55]		MI	rs4244285	A	CYP2C19*2	1.06	0.66	1.69	0.82
Genome-wide association study of platelet reactivity and cardiovascular response in patients treated with clopidogrel: a study by the International Clopidogrel Pharmacogenomics Consortium (ICPC)	Verma et al. (2020) [55]		MACE in CAD	rs4244285	A	CYP2C19*2	1.5	0.99	2.27	0.052
Genomewide Association Study Identifies Novel Genetic Loci That Modify Antiplatelet Effects and Pharmacokinetics of Clopidogrel	Zhong et al. (2017) [64]		MACE in CHD	rs4244285	A	CYP2C19	0.987	0.666	1.461	0.9463
Association analyses based on false discovery rate implicate new loci for coronary artery disease.	Nelson et al. (2017) [46]		CAD	rs425105	C	PRKD2	1.05	1.03	1.07	3.4e-05
Identification of 64 Novel Genetic Loci Provides an Expanded View on the Genetic Architecture of Coronary Artery Disease	van der Harst and Verweij (2018) [15]		CAD	rs425105	C	MIR320E(-4.068kb)|PRKD2(0)	1.03925	1.02188	1.05692	7.719e-06
Novel risk genes identified in a genome-wide association study for coronary artery disease in patients with type 1 diabetes	Charmet et al. (2018) [30]	Discovery stage only	CAD in T1DM	rs4252120	T	PLG	0.91	0.766	1.084	0.852
Shared genetic susceptibility to ischemic stroke and coronary artery disease: a genome-wide analysis of common variants	Dichgans et al. (2014) [32]		CAD	rs4252120	T	PLG	1.07527	1.04167	1.0989	2.73e-05
Genome-wide association study of coronary artery disease among individuals with diabetes: the UK Biobank	Fall et al. (2018) [18]	CAD+DM vs DM	CAD	rs4252120	T	PLG	1.07	1.01	1.14
Genome-wide association study of coronary artery disease among individuals with diabetes: the UK Biobank	Fall et al. (2018) [18]	CAD+DM vs non-DM	CAD	rs4252120	T	PLG	1.05	1.03	1.07
Identification of 64 Novel Genetic Loci Provides an Expanded View on the Genetic Architecture of Coronary Artery Disease	van der Harst and Verweij (2018) [15]		CAD	rs4252120	T	PLG(0)	1.05717	1.04379	1.07073	1.088e-17
Novel risk genes identified in a genome-wide association study for coronary artery disease in patients with type 1 diabetes	Charmet et al. (2018) [30]	Discovery stage only	CAD in T1DM	rs4252185	C	PLG	1.15	0.862	1.541	0.168
LPA Variants are Associated with Residual Cardiovascular Risk in Patients Receiving Statins	Wei et al. (2018) [59]	Validation stage only	CHD during statin therapy	rs4252185	C	PLG	1.34	0.87	2.07	0.1903
LPA Variants are Associated with Residual Cardiovascular Risk in Patients Receiving Statins	Wei et al. (2018) [59]	Discovery stage only	CHD during statin therapy	rs4252185	C	PLG	1.69	1.43	2.01	1.1e-09
Association analyses based on false discovery rate implicate new loci for coronary artery disease.	Nelson et al. (2017) [46]		CAD	rs4299376	T	ABCG8	0.943396	0.925926	0.961538	5.5e-10
Identification of 64 Novel Genetic Loci Provides an Expanded View on the Genetic Architecture of Coronary Artery Disease	van der Harst and Verweij (2018) [15]		CAD	rs4299376	T	ABCG5(+6.618kb)|ABCG8(0)	0.944311	0.931808	0.956981	4.578e-17
A genome-wide association study in europeans and South asians identifies five new loci for coronary artery disease	Peden et al. (2011) [49]		CAD	rs4380028	C	ADAMTS7-MORF4L1	1.07	1.05	1.1	3.71e-09
Association between a genetic variant related to glutamic acid metabolism and coronary heart disease in individuals with type 2 diabetes	Qi et al. (2013) [11]	Stage 1 and 2	CHD	rs4380028	C	ADAMTS7-MORF4L1	1	0.87	1.14	0.96
Identification of 64 Novel Genetic Loci Provides an Expanded View on the Genetic Architecture of Coronary Artery Disease	van der Harst and Verweij (2018) [15]		CAD	rs4380028	C	ADAMTS7(+7.32kb)	1.0612	1.04777	1.07481	5.915e-20
Novel risk genes identified in a genome-wide association study for coronary artery disease in patients with type 1 diabetes	Charmet et al. (2018) [30]	Discovery stage only	CAD in T1DM	rs4420638	G	APOE/APOC1	1.2	0.985	1.461	0.034
A comprehensive 1,000 Genomes-based genome-wide association meta-analysis of coronary artery disease	Nikpay et al. (2015) [5]		CAD	rs4420638	G	APOC1	1.1	1.07	1.13	7.07e-11
Identification of 64 Novel Genetic Loci Provides an Expanded View on the Genetic Architecture of Coronary Artery Disease	van der Harst and Verweij (2018) [15]		CAD	rs4420638	G	APOC1(+0.34kb)|APOC1P1(-7.113kb)	1.09757	1.07923	1.11623	1.367e-27
Novel risk genes identified in a genome-wide association study for coronary artery disease in patients with type 1 diabetes	Charmet et al. (2018) [30]	Discovery stage only	CAD in T1DM	rs445925	G	APOE/APOC1	0.87	0.681	1.129	0.844
Genome-wide association study of coronary artery disease among individuals with diabetes: the UK Biobank	Fall et al. (2018) [18]	CAD+DM vs DM	CAD	rs445925	G	APOE-APOC1	1.07	0.99	1.17
Genome-wide association study of coronary artery disease among individuals with diabetes: the UK Biobank	Fall et al. (2018) [18]	CAD+DM vs non-DM	CAD	rs445925	G	APOE-APOC1	1.1	1.06	1.13
SNPs on chromosome 5p15.3 associated with myocardial infarction in Japanese population	Aoki et al. (2011) [14]	Stage 2 only	MI	rs4593108	C		1.00986	0.901762	1.13091	0.89
Novel risk genes identified in a genome-wide association study for coronary artery disease in patients with type 1 diabetes	Charmet et al. (2018) [30]	Discovery stage only	CAD in T1DM	rs4593108	C	MIR548G	0.93	0.761	1.145	0.743
Genome-wide association study identifies a missense variant at APOA5 for coronary artery disease in Multi-Ethnic Cohorts from Southeast Asia	Han et al. (2017) [36]	Discovery & validation stages	CAD	rs4593108	C	EDNRA	1.05263	0.980392	1.1236	0.159
Association analyses based on false discovery rate implicate new loci for coronary artery disease.	Nelson et al. (2017) [46]		CAD	rs4593108	C	EDNRA	1.07	1.04	1.09	5.79e-10
A comprehensive 1,000 Genomes-based genome-wide association meta-analysis of coronary artery disease	Nikpay et al. (2015) [5]		CAD	rs4593108	C	EDNRA	1.07	1.05	1.1	8.82e-10
Identification of 64 Novel Genetic Loci Provides an Expanded View on the Genetic Architecture of Coronary Artery Disease	van der Harst and Verweij (2018) [15]		CAD	rs4593108	C	.	1.06471	1.04794	1.08175	8.127e-15
Genome-wide association study of coronary artery disease among individuals with diabetes: the UK Biobank	Fall et al. (2018) [18]	CAD+DM vs DM	CAD	rs46522	T	UBE2Z	1.04	0.99	1.1
Genome-wide association study of coronary artery disease among individuals with diabetes: the UK Biobank	Fall et al. (2018) [18]	CAD+DM vs non-DM	CAD	rs46522	T	UBE2Z	1.02	1	1.04
Genome-wide association study identifies a missense variant at APOA5 for coronary artery disease in Multi-Ethnic Cohorts from Southeast Asia	Han et al. (2017) [36]	Discovery & validation stages	CAD	rs46522	T	UBE2Z	1.02	0.95	1.1	0.605
A genome-wide association study of a coronary artery disease risk variant	Lee et al. (2013) [42]		CAD	rs46522	T	GIP-ATP	1.05	0.94	1.11	0.16
Association between a genetic variant related to glutamic acid metabolism and coronary heart disease in individuals with type 2 diabetes	Qi et al. (2013) [11]	Stage 1 and 2	CHD	rs46522	T	UBE2Z, GIP, ATP5G1, SNF8	1.07	0.94	1.22	0.31
Large-scale association analysis identifies 13 new susceptibility loci for coronary artery disease	Schunkert et al. (2011) [52]	CARDIoGRAM and replication	CAD	rs46522	T	UBE2Z,GIP,ATP5G1,SNF8	1.06	1.04	1.08	1.81e-08
Association analyses based on false discovery rate implicate new loci for coronary artery disease.	Nelson et al. (2017) [46]		CAD	rs4773141	G	COL4A1	1.06	1.04	1.08	1.13e-09
Identification of 64 Novel Genetic Loci Provides an Expanded View on the Genetic Architecture of Coronary Artery Disease	van der Harst and Verweij (2018) [15]		CAD	rs4773141	G	COL4A1(0)|COL4A2(-5.277kb)	1.06205	1.04737	1.07693	3.942e-17
Novel risk genes identified in a genome-wide association study for coronary artery disease in patients with type 1 diabetes	Charmet et al. (2018) [30]	Discovery stage only	CAD in T1DM	rs4773144	G	COL4A2	1.0101	0.853242	1.17647	0.493
Shared genetic susceptibility to ischemic stroke and coronary artery disease: a genome-wide analysis of common variants	Dichgans et al. (2014) [32]		CAD	rs4773144	G	COL4A1/COL4A2	1.08	1.05	1.12	2.34e-06
Genome-wide association study of coronary artery disease among individuals with diabetes: the UK Biobank	Fall et al. (2018) [18]	CAD+DM vs DM	CAD	rs4773144	G	COL4A1/A2	1.01	0.96	1.06
Genome-wide association study of coronary artery disease among individuals with diabetes: the UK Biobank	Fall et al. (2018) [18]	CAD+DM vs non-DM	CAD	rs4773144	G	COL4A1/A2	1.03	1.01	1.05
A genome-wide association study of a coronary artery disease risk variant	Lee et al. (2013) [42]		CAD	rs4773144	G	COL4A1-A2	1.12	1.04	1.21	0.00505
Association between a genetic variant related to glutamic acid metabolism and coronary heart disease in individuals with type 2 diabetes	Qi et al. (2013) [11]	Stage 1 and 2	CHD	rs4773144	G	COL4A1, COL4A2	0.96	0.84	1.09	0.5
Large-scale association analysis identifies 13 new susceptibility loci for coronary artery disease	Schunkert et al. (2011) [52]	CARDIoGRAM and replication	CAD	rs4773144	G	COL4A1,COL4A2	1.07	1.05	1.09	3.84e-09
Shared genetic susceptibility to ischemic stroke and coronary artery disease: a genome-wide analysis of common variants	Dichgans et al. (2014) [32]		CAD	rs4845625	T	IL6R	1.06	1.03	1.09	1.93e-05
Genome-wide association study of coronary artery disease among individuals with diabetes: the UK Biobank	Fall et al. (2018) [18]	CAD+DM vs DM	CAD	rs4845625	T	IL6R	1.02	0.96	1.07
Genome-wide association study of coronary artery disease among individuals with diabetes: the UK Biobank	Fall et al. (2018) [18]	CAD+DM vs non-DM	CAD	rs4845625	T	IL6R	1.03	1.01	1.05
Genome-wide association study identifies a missense variant at APOA5 for coronary artery disease in Multi-Ethnic Cohorts from Southeast Asia	Han et al. (2017) [36]	Discovery & validation stages	CAD	rs4845625	T	IL6R	1.02041	0.952381	1.08696	0.649
Identification of 64 Novel Genetic Loci Provides an Expanded View on the Genetic Architecture of Coronary Artery Disease	van der Harst and Verweij (2018) [15]		CAD	rs4845625	T	IL6R(0)	1.04582	1.03461	1.05715	5.676e-16
Genome-wide association study identifies a new locus for coronary artery disease on chromosome 10p11.23	Erdmann et al. (2011) [34]	Stages 1	CAD	rs4977574	G		1.24	1.11	1.38	0.000138
Genome-wide association study identifies a new locus for coronary artery disease on chromosome 10p11.23	Erdmann et al. (2011) [34]	Stage 2 GerMIFS II	CAD	rs4977574	G		1.3	1.16	1.5	4.42e-06
Genome-wide association study identifies a new locus for coronary artery disease on chromosome 10p11.23	Erdmann et al. (2011) [34]	Stage 2 GerMIFS I	CAD	rs4977574	G		1.36	1.21	1.53	1.32e-07
Genome-wide association study of coronary artery disease among individuals with diabetes: the UK Biobank	Fall et al. (2018) [18]	CAD+DM vs DM	CAD	rs4977574	G	9p21	1.18	1.12	1.25
Genome-wide association study of coronary artery disease among individuals with diabetes: the UK Biobank	Fall et al. (2018) [18]	CAD+DM vs non-DM	CAD	rs4977574	G	9p21	1.15	1.13	1.17
Genome-wide association study identifies a missense variant at APOA5 for coronary artery disease in Multi-Ethnic Cohorts from Southeast Asia	Han et al. (2017) [36]	Discovery & validation stages	CAD	rs4977574	G	-	1.2	1.12	1.29	1.33e-07
Genome-wide association study identifies a missense variant at APOA5 for coronary artery disease in Multi-Ethnic Cohorts from Southeast Asia	Han et al. (2017) [36]	Discovery stage only	CAD	rs4977574	G	CDKN2B-AS1	1.221	1.14652	1.29548	1.5e-07
A genome-wide association study identifies PLCL2 and AP3D1-DOT1L-SF3A2 as new susceptibility loci for myocardial infarction in Japanese	Hirokawa et al. (2015) [19]		MI	rs4977574	G	9p21.3	0.819672	0.75188	0.892857	7.53e-06
Genome-wide association of early-onset myocardial infarction with single nucleotide polymorphisms and copy number variants	Kathiresan et al. (2009) [39]		Early-onset MI	rs4977574	G	CDKN2A-CDKN2B	1.28	1.23	1.33	1.1e-30
A genome-wide association study of a coronary artery disease risk variant	Lee et al. (2013) [42]		CAD	rs4977574	G	CDKN2A/2B	1.26	1.16	1.36	1.36e-08
Genome-wide association study of coronary heart disease and its risk factors in 8,090 African Americans: the NHLBI CARe Project	Lettre et al. (2011) [43]		CHD	rs4977574	G	CDKN2A/2B	1.18	0.93	1.49	0.17
A genome-wide association study in europeans and South asians identifies five new loci for coronary artery disease	Peden et al. (2011) [49]		CAD	rs4977574	G	9p21	1.2	1.16	1.25	1.62e-25
Association between a genetic variant related to glutamic acid metabolism and coronary heart disease in individuals with type 2 diabetes	Qi et al. (2013) [11]	Stage 1 and 2	CHD	rs4977574	G	CDKN2A/CDKN2B	1.11	0.97	1.26	0.12
Identification of ADAMTS7 as a novel locus for coronary atherosclerosis and association of ABO with myocardial infarction in the presence of coronary atherosclerosis: two genome-wide association studies	Reilly et al. (2011) [50]	CAD+MI vs CAD-MI	MI in CHD	rs4977574	G	ANRIL, CDKN2A, CDKN2B	1	0.94	1.06	0.96
Identification of ADAMTS7 as a novel locus for coronary atherosclerosis and association of ABO with myocardial infarction in the presence of coronary atherosclerosis: two genome-wide association studies	Reilly et al. (2011) [50]	Angio. CAD vs non-CAD	CAD	rs4977574	G	ANRIL, CDKN2A, CDKN2B	1.3	1.22	1.39	4.78e-14
Genomewide association analysis of coronary artery disease	Samani et al. (2007) [51]	WTCC & German MI Family Study	CAD+MI	rs4977574	G		1.35	1.26	1.45	1.03e-18
Large-scale association analysis identifies 13 new susceptibility loci for coronary artery disease	Schunkert et al. (2011) [52]	CARDIoGRAM only	CAD	rs4977574	G	CDKN2A/2B	1.29	1.23	1.36	1.35e-22
Identification of 64 Novel Genetic Loci Provides an Expanded View on the Genetic Architecture of Coronary Artery Disease	van der Harst and Verweij (2018) [15]		CAD	rs4977574	G	CDKN2B-AS1(0)	1.19578	1.18273	1.20898	8.82e-223
A genome-wide association study identifies LIPA as a susceptibility gene for coronary artery disease	Wild et al. (2011) [60]	GWAS & Replication 1	CAD	rs4977574	G	intergenic	1.3	1.26	1.35	1.04e-45
Identification of 26 novel loci that confer susceptibility to early-onset coronary artery disease in a Japanese population	Yamada et al. (2018b) [63]		Early-onset CAD	rs4977574	G	CDKN2Bâ€‘AS1	1.43	1.21	1.69	0.0001
Novel risk genes identified in a genome-wide association study for coronary artery disease in patients with type 1 diabetes	Charmet et al. (2018) [30]	Discovery stage only	CAD in T1DM	rs501120	T	CXCL12	1.18	0.927	1.508	0.088
Shared genetic susceptibility to ischemic stroke and coronary artery disease: a genome-wide analysis of common variants	Dichgans et al. (2014) [32]		CAD	rs501120	T	CXCL12	1.08696	1.05263	1.13636	1.54e-06
Genome-wide association study of coronary artery disease among individuals with diabetes: the UK Biobank	Fall et al. (2018) [18]	CAD+DM vs DM	CAD	rs501120	T	CXCL12	1.08	1	1.17
Genome-wide association study of coronary artery disease among individuals with diabetes: the UK Biobank	Fall et al. (2018) [18]	CAD+DM vs non-DM	CAD	rs501120	T	CXCL12	1.05	1.02	1.08
Genome-wide association study identifies a missense variant at APOA5 for coronary artery disease in Multi-Ethnic Cohorts from Southeast Asia	Han et al. (2017) [36]	Discovery & validation stages	CAD	rs501120	T	CXCL12	1.05263	0.980392	1.13636	0.191
Genomewide association analysis of coronary artery disease	Samani et al. (2007) [51]	WTCC & German MI Family Study	CAD+MI	rs501120	T		1.33	1.2	1.48	9.46e-08
Identification of 64 Novel Genetic Loci Provides an Expanded View on the Genetic Architecture of Coronary Artery Disease	van der Harst and Verweij (2018) [15]		CAD	rs501120	T	.	1.08177	1.06223	1.10167	3.067e-17
Transethnic Meta-analysis of Genome-wide Association Studies Identifies Three New Loci and Characterizes Population-specific Differences for Coronary Artery Disease	Matsunaga et al. (2020) [16]	Japanese GWAS only	CAD	rs507666	A	ABO	1.14	1.09	1.19	7.38e-10
Association analyses based on false discovery rate implicate new loci for coronary artery disease.	Nelson et al. (2017) [46]		CAD	rs507666	A	ABO	1.08	1.06	1.1	1.29e-12
Identification of 64 Novel Genetic Loci Provides an Expanded View on the Genetic Architecture of Coronary Artery Disease	van der Harst and Verweij (2018) [15]		CAD	rs507666	A	ABO(0)	1.07616	1.05942	1.09317	4.721e-20
Identification of 26 novel loci that confer susceptibility to early-onset coronary artery disease in a Japanese population	Yamada et al. (2018b) [63]		Early-onset CAD	rs507666	A	-	1.21	1.05	1.4	0.0098
Association between a genetic variant related to glutamic acid metabolism and coronary heart disease in individuals with type 2 diabetes	Qi et al. (2013) [11]	Stage 1 and 2	CHD	rs514659	C	ABO	1.12	0.98	1.27	0.11
Identification of ADAMTS7 as a novel locus for coronary atherosclerosis and association of ABO with myocardial infarction in the presence of coronary atherosclerosis: two genome-wide association studies	Reilly et al. (2011) [50]	CAD+MI vs CAD-MI	MI in CHD	rs514659	C	ABO	1.21	1.13	1.29	7.62e-09
Shared genetic susceptibility to ischemic stroke and coronary artery disease: a genome-wide analysis of common variants	Dichgans et al. (2014) [32]		CAD	rs515135	C	APOB	1.06383	1.03093	1.11111	0.000912
Genome-wide association study of coronary artery disease among individuals with diabetes: the UK Biobank	Fall et al. (2018) [18]	CAD+DM vs non-DM	CAD	rs515135	C	APOB	1.03	1.01	1.06
Genome-wide association study of coronary artery disease among individuals with diabetes: the UK Biobank	Fall et al. (2018) [18]	CAD+DM vs DM	CAD	rs515135	C	APOB	1.08	1.01	1.15
Genome-wide association study identifies a missense variant at APOA5 for coronary artery disease in Multi-Ethnic Cohorts from Southeast Asia	Han et al. (2017) [36]	Discovery & validation stages	CAD	rs515135	C	APOB	1	0.88	1.14	0.973
Identification of 64 Novel Genetic Loci Provides an Expanded View on the Genetic Architecture of Coronary Artery Disease	van der Harst and Verweij (2018) [15]		CAD	rs515135	C	.	1.05707	1.04348	1.07083	5.74e-17
Genomewide association analysis of coronary artery disease	Samani et al. (2007) [51]	WTCC & German MI Family Study	CAD+MI	rs518394	G		1.24	1.15	1.32	2.1e-09
A genome-wide association study identifies LIPA as a susceptibility gene for coronary artery disease	Wild et al. (2011) [60]	GWAS & Replication 1	CAD	rs518394	G	MTAP	1.18	1.14	1.23	1.16e-18
Genomewide association analysis of coronary artery disease	Samani et al. (2007) [51]	WTCC & German MI Family Study	CAD+MI	rs523096	A		1.22	1.14	1.31	8.64e-09
A genome-wide association study identifies LIPA as a susceptibility gene for coronary artery disease	Wild et al. (2011) [60]	GWAS & Replication 1	CAD	rs523096	A	MTAP	1.2	1.16	1.24	5.18e-22
Novel risk genes identified in a genome-wide association study for coronary artery disease in patients with type 1 diabetes	Charmet et al. (2018) [30]	Discovery stage only	CAD in T1DM	rs55730499	T	LPA	1.22	0.925	1.609	0.078
A comprehensive 1,000 Genomes-based genome-wide association meta-analysis of coronary artery disease	Nikpay et al. (2015) [5]		CAD	rs55730499	T	LPA	1.37	1.31	1.44	5.39e-39
Identification of 64 Novel Genetic Loci Provides an Expanded View on the Genetic Architecture of Coronary Artery Disease	van der Harst and Verweij (2018) [15]		CAD	rs55730499	T	LPA(0)	1.40046	1.36603	1.43576	3.04e-154
LPA Variants are Associated with Residual Cardiovascular Risk in Patients Receiving Statins	Wei et al. (2018) [59]	Validation stage only	CHD during statin therapy	rs55730499	T	LPA	1.67	1.11	2.5	0.0134
LPA Variants are Associated with Residual Cardiovascular Risk in Patients Receiving Statins	Wei et al. (2018) [59]	Discovery stage only	CHD during statin therapy	rs55730499	T	LPA	1.56	1.33	1.83	6.7e-10
Genome-wide association study identifies a missense variant at APOA5 for coronary artery disease in Multi-Ethnic Cohorts from Southeast Asia	Han et al. (2017) [36]	Discovery & validation stages	CAD	rs55940034	G	COL4A1/A2	1.05	0.94	1.17	0.362
Transethnic Meta-analysis of Genome-wide Association Studies Identifies Three New Loci and Characterizes Population-specific Differences for Coronary Artery Disease	Matsunaga et al. (2020) [16]	Japanese GWAS, UK Biobank & CARDIoGRAMplusC4D	CAD	rs55940034	G	COL4A2	1.06	1.04	1.08	4.41e-10
Novel risk genes identified in a genome-wide association study for coronary artery disease in patients with type 1 diabetes	Charmet et al. (2018) [30]	Discovery stage only	CAD in T1DM	rs56062135	C	SMAD3	1.07	0.893	1.302	0.214
Genome-wide association study of coronary artery disease among individuals with diabetes: the UK Biobank	Fall et al. (2018) [18]	CAD+DM vs DM	CAD	rs56062135	C	SMAD3	1.04	0.98	1.11
Genome-wide association study of coronary artery disease among individuals with diabetes: the UK Biobank	Fall et al. (2018) [18]	CAD+DM vs non-DM	CAD	rs56062135	C	SMAD3	1.04	1.02	1.06
Transethnic Meta-analysis of Genome-wide Association Studies Identifies Three New Loci and Characterizes Population-specific Differences for Coronary Artery Disease	Matsunaga et al. (2020) [16]	Japanese GWAS, UK Biobank & CARDIoGRAMplusC4D	CAD	rs56062135	C	SMAD3	1.08	1.06	1.1	4.73e-13
A comprehensive 1,000 Genomes-based genome-wide association meta-analysis of coronary artery disease	Nikpay et al. (2015) [5]		CAD	rs56062135	C	SMAD3	1.07	1.05	1.1	4.52e-09
Identification of 64 Novel Genetic Loci Provides an Expanded View on the Genetic Architecture of Coronary Artery Disease	van der Harst and Verweij (2018) [15]		CAD	rs56062135	C	SMAD3(0)	1.06769	1.05149	1.08414	4.315e-17
Transethnic Meta-analysis of Genome-wide Association Studies Identifies Three New Loci and Characterizes Population-specific Differences for Coronary Artery Disease	Matsunaga et al. (2020) [16]	Japanese GWAS, UK Biobank & CARDIoGRAMplusC4D	CAD	rs56131196	A	APOC1	1.09	1.07	1.11	2.24e-14
Association analyses based on false discovery rate implicate new loci for coronary artery disease.	Nelson et al. (2017) [46]		CAD	rs56131196	A	APOC1	1.07	1.05	1.1	2.72e-09
Association analyses based on false discovery rate implicate new loci for coronary artery disease.	Nelson et al. (2017) [46]		CAD	rs56210063	C	ST5	1.07	1.03	1.1	6.03e-05
Identification of 64 Novel Genetic Loci Provides an Expanded View on the Genetic Architecture of Coronary Artery Disease	van der Harst and Verweij (2018) [15]		CAD	rs56210063	C	ST5(0)	1.05813	1.0305	1.0865	2.844e-05
Novel risk genes identified in a genome-wide association study for coronary artery disease in patients with type 1 diabetes	Charmet et al. (2018) [30]	Discovery stage only	CAD in T1DM	rs56289821	G	LDLR	1.1	0.855	1.427	0.223
A comprehensive 1,000 Genomes-based genome-wide association meta-analysis of coronary artery disease	Nikpay et al. (2015) [5]		CAD	rs56289821	G	LDLR	1.14	1.11	1.18	4.44e-15
Identification of 64 Novel Genetic Loci Provides an Expanded View on the Genetic Architecture of Coronary Artery Disease	van der Harst and Verweij (2018) [15]		CAD	rs56289821	G	.	1.14477	1.12101	1.16903	1.921e-36
Association analyses based on false discovery rate implicate new loci for coronary artery disease.	Nelson et al. (2017) [46]		CAD	rs56313611	T	PREX1	0.94	0.92	0.97	1.51e-06
Identification of 64 Novel Genetic Loci Provides an Expanded View on the Genetic Architecture of Coronary Artery Disease	van der Harst and Verweij (2018) [15]		CAD	rs56313611	T	.	0.948949	0.931808	0.966405	1.546e-08
Novel risk genes identified in a genome-wide association study for coronary artery disease in patients with type 1 diabetes	Charmet et al. (2018) [30]	Discovery stage only	CAD in T1DM	rs56336142	T	KCNK5	1.04	0.86	1.265	0.333
Genome-wide association study identifies a missense variant at APOA5 for coronary artery disease in Multi-Ethnic Cohorts from Southeast Asia	Han et al. (2017) [36]	Discovery & validation stages	CAD	rs56336142	T	KCNK5	1.06383	0.970874	1.17647	0.194
A comprehensive 1,000 Genomes-based genome-wide association meta-analysis of coronary artery disease	Nikpay et al. (2015) [5]		CAD	rs56336142	T	KCNK5	1.07	1.04	1.09	1.85e-08
Transethnic Meta-analysis of Genome-wide Association Studies Identifies Three New Loci and Characterizes Population-specific Differences for Coronary Artery Disease	Matsunaga et al. (2020) [16]	Japanese GWAS, UK Biobank & CARDIoGRAMplusC4D	CAD	rs56393506	T	LPA	1.15	1.13	1.18	5.12e-34
LPA Variants are Associated with Residual Cardiovascular Risk in Patients Receiving Statins	Wei et al. (2018) [59]	Validation stage only	CHD during statin therapy	rs56393506	T	LPA	1.17	0.86	1.61	0.3198
LPA Variants are Associated with Residual Cardiovascular Risk in Patients Receiving Statins	Wei et al. (2018) [59]	Discovery stage only	CHD during statin therapy	rs56393506	T	LPA	1.31	1.17	1.47	1.1e-08
Genomewide association analysis of coronary artery disease	Samani et al. (2007) [51]	WTCC & German MI Family Study	CAD+MI	rs564398	T		1.26	1.17	1.35	8.58e-11
A genome-wide association study identifies LIPA as a susceptibility gene for coronary artery disease	Wild et al. (2011) [60]	GWAS & Replication 1	CAD	rs564398	T	MTAP	1.21	1.17	1.26	1.77e-24
Association analyses based on false discovery rate implicate new loci for coronary artery disease.	Nelson et al. (2017) [46]		CAD	rs571353	T	GDPD5	0.96	0.94	0.98	6.67e-06
Identification of 64 Novel Genetic Loci Provides an Expanded View on the Genetic Architecture of Coronary Artery Disease	van der Harst and Verweij (2018) [15]		CAD	rs571353	T	GDPD5(0)	0.957145	0.944103	0.970368	4.726e-10
Genome-wide association study of coronary artery disease among individuals with diabetes: the UK Biobank	Fall et al. (2018) [18]	CAD+DM vs DM	CAD	rs579459	C	ABO	1.01	0.95	1.08
Genome-wide association study of coronary artery disease among individuals with diabetes: the UK Biobank	Fall et al. (2018) [18]	CAD+DM vs non-DM	CAD	rs579459	C	ABO	1.03	1.01	1.06
A genome-wide association study of a coronary artery disease risk variant	Lee et al. (2013) [42]		CAD	rs579459	C	ABO	1.08	0.99	1.18	0.07
Association between a genetic variant related to glutamic acid metabolism and coronary heart disease in individuals with type 2 diabetes	Qi et al. (2013) [11]	Stage 1 and 2	CHD	rs579459	C	ABO	1.04	0.89	1.21	0.62
Large-scale association analysis identifies 13 new susceptibility loci for coronary artery disease	Schunkert et al. (2011) [52]	CARDIoGRAM and replication	CAD	rs579459	C	ABO	1.1	1.07	1.13	4.08e-14
Novel risk genes identified in a genome-wide association study for coronary artery disease in patients with type 1 diabetes	Charmet et al. (2018) [30]	Discovery stage only	CAD in T1DM	rs590121	T	SERPINH1	0.8	0.669	0.961	0.992
Identification of 64 Novel Genetic Loci Provides an Expanded View on the Genetic Architecture of Coronary Artery Disease	van der Harst and Verweij (2018) [15]		CAD	rs590121	T	SERPINH1(0)	1.03935	1.027	1.05186	2.435e-10
Association analyses based on false discovery rate implicate new loci for coronary artery disease.	Nelson et al. (2017) [46]		CAD	rs59898454	A	RPP30	1.16279	1.08696	1.23457	2.36e-06
Identification of 64 Novel Genetic Loci Provides an Expanded View on the Genetic Architecture of Coronary Artery Disease	van der Harst and Verweij (2018) [15]		CAD	rs59898454	A	RPP30(0)	1.09615	1.04762	1.14692	6.797e-05
A genome-wide association study of a coronary artery disease risk variant	Lee et al. (2013) [42]		CAD	rs599839	A	SORT1	1.34	1.12	1.61	0.0013
Genome-wide association study for coronary artery calcification with follow-up in myocardial infarction	O'Donnell et al. (2011) [47]		MI	rs599839	A	PSRC1	1.09308	1.02864	1.16156	0.00386
Genomewide association analysis of coronary artery disease	Samani et al. (2007) [51]	WTCC & German MI Family Study	CAD+MI	rs599839	A		1.29	1.18	1.4	4.05e-09
Large-scale association analysis identifies 13 new susceptibility loci for coronary artery disease	Schunkert et al. (2011) [52]	CARDIoGRAM only	CAD	rs599839	A	SORT1	1.11	1.08	1.15	2.89e-10
Identification of 26 novel loci that confer susceptibility to early-onset coronary artery disease in a Japanese population	Yamada et al. (2018b) [63]		Early-onset CAD	rs599839	A	PSRC1	1.49254	1.20482	1.85185	0.0004
Shared genetic susceptibility to ischemic stroke and coronary artery disease: a genome-wide analysis of common variants	Dichgans et al. (2014) [32]		CAD	rs602633	T	SORT1	0.9	0.87	0.93	1.42e-08
Identification of 64 Novel Genetic Loci Provides an Expanded View on the Genetic Architecture of Coronary Artery Disease	van der Harst and Verweij (2018) [15]		CAD	rs602633	T	CELSR2(+3.133kb)|PSRC1(-0.664kb)	0.894044	0.882035	0.906217	2.009e-59
Discovery of 318 new risk loci for type 2 diabetes and related vascular outcomes among 1.4 million participants in a multi-ancestry meta-analysis	Vujkovic et al. (2020) [56]		CHD with T2D	rs602633	T	SORT1	0.88338	0.859469	0.907955	4.2e-19
Discovery of 318 new risk loci for type 2 diabetes and related vascular outcomes among 1.4 million participants in a multi-ancestry meta-analysis	Vujkovic et al. (2020) [56]		CHD w/out T2D	rs602633	T	SORT1	0.897628	0.875045	0.920793	9.9e-17
Identification of 26 novel loci that confer susceptibility to early-onset coronary artery disease in a Japanese population	Yamada et al. (2018b) [63]		Early-onset CAD	rs602633	T	-	0.64	0.51	0.8	0.0001
Association analyses based on false discovery rate implicate new loci for coronary artery disease.	Nelson et al. (2017) [46]		CAD	rs6129767	G	ZHX3	1.04	1.02	1.06	8.89e-06
Identification of 64 Novel Genetic Loci Provides an Expanded View on the Genetic Architecture of Coronary Artery Disease	van der Harst and Verweij (2018) [15]		CAD	rs6129767	G	ZHX3(0)	1.03925	1.02529	1.0534	2.344e-08
Identification of 13 novel susceptibility loci for early-onset myocardial infarction, hypertension, or chronic kidney disease	Yamada et al. (2018a) [62]		MI	rs61734696	T	MARCH1	0.01	0.01	0.1	0.0001
Identification of 26 novel loci that confer susceptibility to early-onset coronary artery disease in a Japanese population	Yamada et al. (2018b) [63]		Early-onset CAD	rs61734696	T	MARCH1	0.02	0.01	0.1	0.0001
Association analyses based on false discovery rate implicate new loci for coronary artery disease.	Nelson et al. (2017) [46]		CAD	rs62076439	T	ZNF652	1.05	1.03	1.06	3.5e-07
Identification of 64 Novel Genetic Loci Provides an Expanded View on the Genetic Architecture of Coronary Artery Disease	van der Harst and Verweij (2018) [15]		CAD	rs62076439	T	ZNF652(0)	1.04917	1.0369	1.06158	1.63e-15
Association analyses based on false discovery rate implicate new loci for coronary artery disease.	Nelson et al. (2017) [46]		CAD	rs62253653	A	SFMBT1	1.04167	1.02041	1.05263	8.56e-05
Identification of 64 Novel Genetic Loci Provides an Expanded View on the Genetic Architecture of Coronary Artery Disease	van der Harst and Verweij (2018) [15]		CAD	rs62253653	A	SFMBT1(0)	1.02757	1.01337	1.04197	0.0001384
Genome-wide association study of coronary heart disease and its risk factors in 8,090 African Americans: the NHLBI CARe Project	Lettre et al. (2011) [43]		CHD	rs629301	T	CELSR2	1.09	0.94	1.25	0.2621
Identification of 26 novel loci that confer susceptibility to early-onset coronary artery disease in a Japanese population	Yamada et al. (2018b) [63]		Early-onset CAD	rs629301	T	CELSR2	1.53846	1.21951	1.92308	0.0002
Association analyses based on false discovery rate implicate new loci for coronary artery disease.	Nelson et al. (2017) [46]		CAD	rs634552	G	SERPINH1	1.05	1.02	1.07	7.99e-05
Identification of 64 Novel Genetic Loci Provides an Expanded View on the Genetic Architecture of Coronary Artery Disease	van der Harst and Verweij (2018) [15]		CAD	rs634552	G	SERPINH1(0)	1.0594	1.04047	1.07867	3.505e-10
Genomewide association analysis of coronary artery disease	Samani et al. (2007) [51]	WTCC & German MI Family Study	CAD+MI	rs643319	C		1.25	1.16	1.34	2.21e-10
A genome-wide association study identifies LIPA as a susceptibility gene for coronary artery disease	Wild et al. (2011) [60]	GWAS & Replication 1	CAD	rs643319	C	MTAP	1.17	1.13	1.22	1.92e-14
Transethnic Meta-analysis of Genome-wide Association Studies Identifies Three New Loci and Characterizes Population-specific Differences for Coronary Artery Disease	Matsunaga et al. (2020) [16]	Japanese GWAS, UK Biobank & CARDIoGRAMplusC4D	CAD	rs643434	A	ABO	1.05	1.03	1.06	3.77e-09
Identification of ADAMTS7 as a novel locus for coronary atherosclerosis and association of ABO with myocardial infarction in the presence of coronary atherosclerosis: two genome-wide association studies	Reilly et al. (2011) [50]	CAD+MI vs CAD-MI	MI in CHD	rs643434	A	ABO	1.2	1.13	1.28	1.64e-08
Genome-wide association study of coronary artery disease among individuals with diabetes: the UK Biobank	Fall et al. (2018) [18]	CAD+DM vs non-DM	CAD	rs646776	T	SORT1	1.11	1.08	1.13
Genome-wide association study of coronary artery disease among individuals with diabetes: the UK Biobank	Fall et al. (2018) [18]	CAD+DM vs DM	CAD	rs646776	T	SORT1	1.18	1.11	1.26
Genome-wide association study identifies a missense variant at APOA5 for coronary artery disease in Multi-Ethnic Cohorts from Southeast Asia	Han et al. (2017) [36]	Discovery & validation stages	CAD	rs646776	T	SORT1	1.12	0.99	1.26	0.065
A genome-wide association study identifies PLCL2 and AP3D1-DOT1L-SF3A2 as new susceptibility loci for myocardial infarction in Japanese	Hirokawa et al. (2015) [19]		MI	rs646776	T	CELSR2-PSRC1-SORT1	0.78	0.66	0.92	0.00551
Genome-wide association of early-onset myocardial infarction with single nucleotide polymorphisms and copy number variants	Kathiresan et al. (2009) [39]		Early-onset MI	rs646776	T	CELSR2-PSRC1-SORT1	1.17	1.11	1.24	1.5e-08
Genetic analysis in UK Biobank links insulin resistance and transendothelial migration pathways to coronary artery disease	Klarin et al. (2017) [41]	UK Biobank	CAD	rs646776	T	1p13/SORT1 (downstream)	1.17	1.11	1.23	1.3e-08
A genome-wide association study in europeans and South asians identifies five new loci for coronary artery disease	Peden et al. (2011) [49]		CAD	rs646776	T	CELSR2-PSRC1-SORT1	1.14	1.09	1.19	6.05e-10
Association between a genetic variant related to glutamic acid metabolism and coronary heart disease in individuals with type 2 diabetes	Qi et al. (2013) [11]	Stage 1 and 2	CHD	rs646776	T	CELSR2-PSRC1-SORT1	1.21	1.03	1.42	0.02
Identification of ADAMTS7 as a novel locus for coronary atherosclerosis and association of ABO with myocardial infarction in the presence of coronary atherosclerosis: two genome-wide association studies	Reilly et al. (2011) [50]	CAD+MI vs CAD-MI	MI in CHD	rs646776	T	SORT1	1.02	0.94	1.11	0.69
Identification of ADAMTS7 as a novel locus for coronary atherosclerosis and association of ABO with myocardial infarction in the presence of coronary atherosclerosis: two genome-wide association studies	Reilly et al. (2011) [50]	Angio. CAD vs non-CAD	CAD	rs646776	T	SORT1	1.33	1.22	1.44	7.88e-11
Identification of 26 novel loci that confer susceptibility to early-onset coronary artery disease in a Japanese population	Yamada et al. (2018b) [63]		Early-onset CAD	rs646776	T	CELSR2	1.53846	1.21951	1.92308	0.0002
SNPs on chromosome 5p15.3 associated with myocardial infarction in Japanese population	Aoki et al. (2011) [14]	Stage 2 only	MI	rs6475606	T		1.1015	0.983906	1.23315	0.095
Genome-wide association study identifies a new locus for coronary artery disease on chromosome 10p11.23	Erdmann et al. (2011) [34]	Stages 1	CAD	rs6475606	T		1.21	1.08	1.35	0.000707
Genome-wide association study identifies a new locus for coronary artery disease on chromosome 10p11.23	Erdmann et al. (2011) [34]	Stage 2 GerMIFS I	CAD	rs6475606	T		1.29	1.15	1.45	1.11e-05
Genome-wide association study identifies a new locus for coronary artery disease on chromosome 10p11.23	Erdmann et al. (2011) [34]	Stage 2 GerMIFS II	CAD	rs6475606	T		1.32	1.18	1.48	1.01e-06
Genome-wide association study of coronary heart disease and its risk factors in 8,090 African Americans: the NHLBI CARe Project	Lettre et al. (2011) [43]		CHD	rs6475606	T	CDKN2A/2B	1.99	1.34	2.96	0.00064
Genomewide association analysis of coronary artery disease	Samani et al. (2007) [51]	WTCC & German MI Family Study	CAD+MI	rs6475606	T		1.34	1.25	1.43	1.45e-17
A genome-wide association study identifies LIPA as a susceptibility gene for coronary artery disease	Wild et al. (2011) [60]	GWAS & Replication 1	CAD	rs6475606	T	intergenic	1.29	1.25	1.34	1.23e-43
Novel risk genes identified in a genome-wide association study for coronary artery disease in patients with type 1 diabetes	Charmet et al. (2018) [30]	Discovery stage only	CAD in T1DM	rs6494488	A	RBPMS2	0.990099	0.78125	1.24533	0.545
Identification of 64 Novel Genetic Loci Provides an Expanded View on the Genetic Architecture of Coronary Artery Disease	van der Harst and Verweij (2018) [15]		CAD	rs6494488	A	RBPMS2(-7.89kb)	1.04404	1.02861	1.05971	1.358e-08
Association analyses based on false discovery rate implicate new loci for coronary artery disease.	Nelson et al. (2017) [46]		CAD	rs6504218	G	PECAM1	1.04	1.02	1.06	1.23e-06
Identification of 64 Novel Genetic Loci Provides an Expanded View on the Genetic Architecture of Coronary Artery Disease	van der Harst and Verweij (2018) [15]		CAD	rs6504218	G	PECAM1(+1.216kb)	1.04091	1.02814	1.05385	2.48e-10
Genome-wide association study of coronary heart disease and its risk factors in 8,090 African Americans: the NHLBI CARe Project	Lettre et al. (2011) [43]		CHD	rs6511720	T	LDLR	1.01	0.8	1.27	0.9338
Association analyses based on false discovery rate implicate new loci for coronary artery disease.	Nelson et al. (2017) [46]		CAD	rs6511720	T	LDLR	0.88	0.86	0.9	2.92e-21
Identification of 64 Novel Genetic Loci Provides an Expanded View on the Genetic Architecture of Coronary Artery Disease	van der Harst and Verweij (2018) [15]		CAD	rs6511720	T	LDLR(0)	0.876166	0.857982	0.894735	2.954e-35
Association analyses based on false discovery rate implicate new loci for coronary artery disease.	Nelson et al. (2017) [46]		CAD	rs6538176	T	BBS10	1.05	1.03	1.07	8.03e-06
Identification of 64 Novel Genetic Loci Provides an Expanded View on the Genetic Architecture of Coronary Artery Disease	van der Harst and Verweij (2018) [15]		CAD	rs6538176	T	.	1.02778	1.01199	1.04382	0.0005554
Shared genetic susceptibility to ischemic stroke and coronary artery disease: a genome-wide analysis of common variants	Dichgans et al. (2014) [32]		CAD	rs6544713	T	ABCG5-ABCG8	1.06	1.03	1.1	0.0052
Genome-wide association study of coronary artery disease among individuals with diabetes: the UK Biobank	Fall et al. (2018) [18]	CAD+DM vs DM	CAD	rs6544713	T	ABCG5-ABCG8	1.02	0.97	1.08
Genome-wide association study of coronary artery disease among individuals with diabetes: the UK Biobank	Fall et al. (2018) [18]	CAD+DM vs non-DM	CAD	rs6544713	T	ABCG5-ABCG8	1.05	1.03	1.07
A genome-wide association study identifies PLCL2 and AP3D1-DOT1L-SF3A2 as new susceptibility loci for myocardial infarction in Japanese	Hirokawa et al. (2015) [19]		MI	rs6544713	T	ABCG5-ABCG8	0.52	0.03	8.33	0.654
Identification of 64 Novel Genetic Loci Provides an Expanded View on the Genetic Architecture of Coronary Artery Disease	van der Harst and Verweij (2018) [15]		CAD	rs6544713	T	ABCG5(+7.923kb)|ABCG8(0)	1.05043	1.03896	1.06202	1.838e-18
A genome-wide association study identifies PLCL2 and AP3D1-DOT1L-SF3A2 as new susceptibility loci for myocardial infarction in Japanese	Hirokawa et al. (2015) [19]		MI	rs657152	C	ABO	0.87	0.8	0.95	0.00263
Identification of ADAMTS7 as a novel locus for coronary atherosclerosis and association of ABO with myocardial infarction in the presence of coronary atherosclerosis: two genome-wide association studies	Reilly et al. (2011) [50]	CAD+MI vs CAD-MI	MI in CHD	rs657152	C	ABO	0.840336	0.787402	0.892857	4.11e-08
Novel risk genes identified in a genome-wide association study for coronary artery disease in patients with type 1 diabetes	Charmet et al. (2018) [30]	Discovery stage only	CAD in T1DM	rs663129	A	U4/MC4R	1.01	0.847	1.227	0.418
Genome-wide association study of coronary artery disease among individuals with diabetes: the UK Biobank	Fall et al. (2018) [18]	CAD+DM vs DM	CAD	rs663129	A	PMAIP1-MC4R	1.01	0.95	1.08
Genome-wide association study of coronary artery disease among individuals with diabetes: the UK Biobank	Fall et al. (2018) [18]	CAD+DM vs non-DM	CAD	rs663129	A	PMAIP1-MC4R	1.02	1	1.05
Genome-wide association study identifies a missense variant at APOA5 for coronary artery disease in Multi-Ethnic Cohorts from Southeast Asia	Han et al. (2017) [36]	Discovery & validation stages	CAD	rs663129	A	PMAIP1-MC4R	1.11	1.01	1.21	0.0269
A comprehensive 1,000 Genomes-based genome-wide association meta-analysis of coronary artery disease	Nikpay et al. (2015) [5]		CAD	rs663129	A	PMAIP1-MC4R	1.06	1.04	1.08	3.2e-08
Association analyses based on false discovery rate implicate new loci for coronary artery disease.	Nelson et al. (2017) [46]		CAD	rs6689306	A	IL6R	1.05	1.03	1.07	1.63e-09
A comprehensive 1,000 Genomes-based genome-wide association meta-analysis of coronary artery disease	Nikpay et al. (2015) [5]		CAD	rs6689306	A	IL6R	1.06	1.04	1.08	2.6e-09
Novel risk genes identified in a genome-wide association study for coronary artery disease in patients with type 1 diabetes	Charmet et al. (2018) [30]	Discovery stage only	CAD in T1DM	rs6700559	T	DDX59	1.15	0.982	1.338	0.958
Identification of 64 Novel Genetic Loci Provides an Expanded View on the Genetic Architecture of Coronary Artery Disease	van der Harst and Verweij (2018) [15]		CAD	rs6700559	T	DDX59(+6.947kb)|LOC101929224(0)	0.971999	0.96252	0.981572	1.769e-08
Genome-wide association study of coronary artery disease in the Japanese	Takeuchi et al. (2012) [54]		CAD	rs671	A	ALDH2	1.43	1.35	1.51	1.6e-34
Identification of 13 novel susceptibility loci for early-onset myocardial infarction, hypertension, or chronic kidney disease	Yamada et al. (2018a) [62]		MI	rs671	A	ALDH2	2.71	2.08	3.53	0.0001
Identification of 26 novel loci that confer susceptibility to early-onset coronary artery disease in a Japanese population	Yamada et al. (2018b) [63]		Early-onset CAD	rs671	A	ALDH2	1.8	1.44	2.26	0.0001
Transethnic Meta-analysis of Genome-wide Association Studies Identifies Three New Loci and Characterizes Population-specific Differences for Coronary Artery Disease	Matsunaga et al. (2020) [16]	Japanese GWAS only	CAD	rs67180937	G	MIA3	1.13	1.09	1.17	3.18e-10
Association analyses based on false discovery rate implicate new loci for coronary artery disease.	Nelson et al. (2017) [46]		CAD	rs67180937	G	MIA3	1.07	1.05	1.09	8.13e-14
A comprehensive 1,000 Genomes-based genome-wide association meta-analysis of coronary artery disease	Nikpay et al. (2015) [5]		CAD	rs67180937	G	MIA3	1.08	1.06	1.11	1.01e-12
Identification of 64 Novel Genetic Loci Provides an Expanded View on the Genetic Architecture of Coronary Artery Disease	van der Harst and Verweij (2018) [15]		CAD	rs67180937	G	MIA3(0)	1.08285	1.06705	1.09889	1.265e-26
Shared genetic susceptibility to ischemic stroke and coronary artery disease: a genome-wide analysis of common variants	Dichgans et al. (2014) [32]		CAD	rs6725887	C	WDR12	1.14	1.1	1.19	2.37e-08
Genome-wide association study of coronary artery disease among individuals with diabetes: the UK Biobank	Fall et al. (2018) [18]	CAD+DM vs DM	CAD	rs6725887	C	WDR12	1.08	1	1.16
Genome-wide association study of coronary artery disease among individuals with diabetes: the UK Biobank	Fall et al. (2018) [18]	CAD+DM vs non-DM	CAD	rs6725887	C	WDR12	1.07	1.04	1.11
Genome-wide association study identifies a missense variant at APOA5 for coronary artery disease in Multi-Ethnic Cohorts from Southeast Asia	Han et al. (2017) [36]	Discovery & validation stages	CAD	rs6725887	C	WDR12	1.18	0.91	1.52	0.211
A genome-wide association study identifies PLCL2 and AP3D1-DOT1L-SF3A2 as new susceptibility loci for myocardial infarction in Japanese	Hirokawa et al. (2015) [19]		MI	rs6725887	C	WDR12	1.01	0.59	1.74	0.973
Genome-wide association of early-onset myocardial infarction with single nucleotide polymorphisms and copy number variants	Kathiresan et al. (2009) [39]		Early-onset MI	rs6725887	C	WDR12	1.17	1.11	1.23	1.3e-08
A genome-wide association study of a coronary artery disease risk variant	Lee et al. (2013) [42]		CAD	rs6725887	C	WDR12	1.38	0.99	1.89	0.05
A genome-wide association study in europeans and South asians identifies five new loci for coronary artery disease	Peden et al. (2011) [49]		CAD	rs6725887	C	WDR12	1.11	1.05	1.19	0.000619
Association between a genetic variant related to glutamic acid metabolism and coronary heart disease in individuals with type 2 diabetes	Qi et al. (2013) [11]	Stage 1 and 2	CHD	rs6725887	C	WDR12	0.89	0.74	1.07	0.23
Identification of ADAMTS7 as a novel locus for coronary atherosclerosis and association of ABO with myocardial infarction in the presence of coronary atherosclerosis: two genome-wide association studies	Reilly et al. (2011) [50]	CAD+MI vs CAD-MI	MI in CHD	rs6725887	C	WDR12	0.99	0.91	1.08	0.87
Identification of ADAMTS7 as a novel locus for coronary atherosclerosis and association of ABO with myocardial infarction in the presence of coronary atherosclerosis: two genome-wide association studies	Reilly et al. (2011) [50]	Angio. CAD vs non-CAD	CAD	rs6725887	C	WDR12	1.28	1.15	1.45	1.74e-05
Large-scale association analysis identifies 13 new susceptibility loci for coronary artery disease	Schunkert et al. (2011) [52]	CARDIoGRAM only	CAD	rs6725887	C	WDR12	1.14	1.09	1.19	1.12e-09
A comprehensive 1,000 Genomes-based genome-wide association meta-analysis of coronary artery disease	Nikpay et al. (2015) [5]		CAD	rs68170813	T	7q22	1.05	1.03	1.08	6.26e-06
Identification of 64 Novel Genetic Loci Provides an Expanded View on the Genetic Architecture of Coronary Artery Disease	van der Harst and Verweij (2018) [15]		CAD	rs68170813	T	BCAP29(0)	1.0349	1.01979	1.05022	5.629e-06
Association analyses based on false discovery rate implicate new loci for coronary artery disease.	Nelson et al. (2017) [46]		CAD	rs6841581	A	EDNRA	1.08	1.05	1.1	3.07e-11
Identification of 64 Novel Genetic Loci Provides an Expanded View on the Genetic Architecture of Coronary Artery Disease	van der Harst and Verweij (2018) [15]		CAD	rs6841581	A	EDNRA(-0.878kb)	1.07799	1.06247	1.09374	5.177e-24
A genome-wide association study identifies PLCL2 and AP3D1-DOT1L-SF3A2 as new susceptibility loci for myocardial infarction in Japanese	Hirokawa et al. (2015) [19]		MI	rs6842241	A	EDNRA	0.96	0.88	1.05	0.362
Identification of 64 Novel Genetic Loci Provides an Expanded View on the Genetic Architecture of Coronary Artery Disease	van der Harst and Verweij (2018) [15]		CAD	rs6842241	A	EDNRA(-1.249kb)	1.08437	1.06729	1.10172	1.306e-23
Genome-wide association study of 14,000 cases of seven common diseases and 3,000 shared controls	Burton et al. (2007) [29]		CAD	rs688034	T		1.62	1.34	1.95	3.75e-06
Genomewide association analysis of coronary artery disease	Samani et al. (2007) [51]	German MI Family Study only	MI	rs688034	T		1.06	0.93	1.2	0.37
Genomewide association analysis of coronary artery disease	Samani et al. (2007) [51]	WTCC only	CAD	rs688034	T		1.22	1.12	1.33	6.9e-06
Large-scale association analysis identifies 13 new susceptibility loci for coronary artery disease	Schunkert et al. (2011) [52]	CARDIoGRAM only	CAD	rs688034	T	SEZ6L	0.99108	0.961538	1.02145	0.562
Genome-wide association study of coronary artery disease among individuals with diabetes: the UK Biobank	Fall et al. (2018) [18]	CAD+DM vs DM	CAD	rs6903956	A	ADTRP-C6orf105	0.98	0.93	1.03
Genome-wide association study of coronary artery disease among individuals with diabetes: the UK Biobank	Fall et al. (2018) [18]	CAD+DM vs non-DM	CAD	rs6903956	A	ADTRP-C6orf105	1	0.98	1.02
Genome-wide association study identifies a missense variant at APOA5 for coronary artery disease in Multi-Ethnic Cohorts from Southeast Asia	Han et al. (2017) [36]	Discovery & validation stages	CAD	rs6903956	A	ADTRP-C6orf105	1.21951	1.06383	1.38889	0.00524
A genome-wide association study identifies PLCL2 and AP3D1-DOT1L-SF3A2 as new susceptibility loci for myocardial infarction in Japanese	Hirokawa et al. (2015) [19]		MI	rs6903956	A	C6orf105	0.97	0.83	1.12	0.665
Genome-wide association identifies a susceptibility locus for coronary artery disease in the Chinese Han population	Wang et al. (2011) [58]	Stages 1,2,3	CAD	rs6903956	A	C6orf105	1.51	1.34	1.7	4.87e-12
Association analyses based on false discovery rate implicate new loci for coronary artery disease.	Nelson et al. (2017) [46]		CAD	rs6905288	A	VEGFA	1.04	1.02	1.06	2.1e-06
Identification of 64 Novel Genetic Loci Provides an Expanded View on the Genetic Architecture of Coronary Artery Disease	van der Harst and Verweij (2018) [15]		CAD	rs6905288	A	VEGFA,MRPL14,TMEM63B	1.05	1.03	1.06	1.9e-12
Novel risk genes identified in a genome-wide association study for coronary artery disease in patients with type 1 diabetes	Charmet et al. (2018) [30]	Discovery stage only	CAD in T1DM	rs6909752	A	HDGFL1	1.01	0.851	1.186	0.476
Association analyses based on false discovery rate implicate new loci for coronary artery disease.	Nelson et al. (2017) [46]		CAD	rs6909752	A	HDGFL1	1.051	1.034	1.068	2.19e-09
Identification of 64 Novel Genetic Loci Provides an Expanded View on the Genetic Architecture of Coronary Artery Disease	van der Harst and Verweij (2018) [15]		CAD	rs6909752	A	-	1.04519	1.03317	1.05735	5.708e-14
Genome-wide association study of 14,000 cases of seven common diseases and 3,000 shared controls	Burton et al. (2007) [29]		CAD	rs6922269	A		1.65	1.32	2.06	1.5e-05
Genome-wide association of early-onset myocardial infarction with single nucleotide polymorphisms and copy number variants	Kathiresan et al. (2009) [39]		Early-onset MI	rs6922269	A	MTHFD1L	1.04	0.99	1.09	0.08
Genomewide association analysis of coronary artery disease	Samani et al. (2007) [51]	WTCC & German MI Family Study	CAD+MI	rs6922269	A		1.23	1.15	1.33	2.9e-08
Large-scale association analysis identifies 13 new susceptibility loci for coronary artery disease	Schunkert et al. (2011) [52]	CARDIoGRAM only	CAD	rs6922269	A	MTHFD1L	1.063	1.031	1.095	7.38e-05
Genomewide association analysis of coronary artery disease	Samani et al. (2007) [51]	WTCC & German MI Family Study	CAD+MI	rs7044859	A		1.26	1.18	1.35	2.9e-11
A genome-wide association study identifies LIPA as a susceptibility gene for coronary artery disease	Wild et al. (2011) [60]	GWAS, Replication 1 & 2	CAD	rs7044859	A	MTAP	1.17	1.08	1.27	2.03e-05
Genome-wide association study of coronary artery disease among individuals with diabetes: the UK Biobank	Fall et al. (2018) [18]	CAD+DM vs DM	CAD	rs7136259	T	ATP2B1	1	0.95	1.06
Genome-wide association study of coronary artery disease among individuals with diabetes: the UK Biobank	Fall et al. (2018) [18]	CAD+DM vs non-DM	CAD	rs7136259	T	ATP2B1	1.01	0.99	1.03
Genome-wide association study in Han Chinese identifies four new susceptibility loci for coronary artery disease	Lu et al. (2012) [44]	Discovery & replications 1,2,3	CAD	rs7136259	T	ATP2B1	1.11	1.08	1.15	5.68e-10
Novel risk genes identified in a genome-wide association study for coronary artery disease in patients with type 1 diabetes	Charmet et al. (2018) [30]	Discovery stage only	CAD in T1DM	rs7173743	T	ADAMTS7	1	0.855	1.171	0.495
Shared genetic susceptibility to ischemic stroke and coronary artery disease: a genome-wide analysis of common variants	Dichgans et al. (2014) [32]		CAD	rs7173743	T	ADAMTS7	1.07527	1.05263	1.11111	6.7e-08
Genome-wide association study of coronary artery disease among individuals with diabetes: the UK Biobank	Fall et al. (2018) [18]	CAD+DM vs DM	CAD	rs7173743	T	ADAMTS7	1.07	1.02	1.13
Genome-wide association study of coronary artery disease among individuals with diabetes: the UK Biobank	Fall et al. (2018) [18]	CAD+DM vs non-DM	CAD	rs7173743	T	ADAMTS7	1.06	1.04	1.08
Genome-wide association study identifies a missense variant at APOA5 for coronary artery disease in Multi-Ethnic Cohorts from Southeast Asia	Han et al. (2017) [36]	Discovery & validation stages	CAD	rs7173743	T	ADAMTS7	1.13636	1.06383	1.21951	0.000295
Identification of 64 Novel Genetic Loci Provides an Expanded View on the Genetic Architecture of Coronary Artery Disease	van der Harst and Verweij (2018) [15]		CAD	rs7173743	T	.	1.06567	1.05507	1.07637	5.481e-36
Novel risk genes identified in a genome-wide association study for coronary artery disease in patients with type 1 diabetes	Charmet et al. (2018) [30]	Discovery stage only	CAD in T1DM	rs7212798	C	BCAS3	0.98	0.786	1.221	0.57
Genome-wide association study identifies a missense variant at APOA5 for coronary artery disease in Multi-Ethnic Cohorts from Southeast Asia	Han et al. (2017) [36]	Discovery & validation stages	CAD	rs7212798	C	BCAS3	1.09	0.98	1.22	0.095
A comprehensive 1,000 Genomes-based genome-wide association meta-analysis of coronary artery disease	Nikpay et al. (2015) [5]		CAD	rs7212798	C	BCAS3	1.08	1.05	1.11	1.88e-08
Genome-wide association study identifies a missense variant at APOA5 for coronary artery disease in Multi-Ethnic Cohorts from Southeast Asia	Han et al. (2017) [36]	Discovery & validation stages	CAD	rs7214245	T	RAI1-PEMT-RASD1	1.02041	0.909091	1.14943	0.727
A comprehensive 1,000 Genomes-based genome-wide association meta-analysis of coronary artery disease	Nikpay et al. (2015) [5]		CAD	rs7214245	T	RAI1-PEMT-RASD1	1.04	1.02	1.06	1.82e-05
Genome-wide association study of 14,000 cases of seven common diseases and 3,000 shared controls	Burton et al. (2007) [29]		CAD	rs7250581	G		1.4	1.05	1.86	2.5e-05
Genomewide association analysis of coronary artery disease	Samani et al. (2007) [51]	German MI Family Study only	MI	rs7250581	G		0.91	0.78	1.06	0.21
Genomewide association analysis of coronary artery disease	Samani et al. (2007) [51]	WTCC only	CAD	rs7250581	G		1.26	1.14	1.39	9.12e-06
Large-scale association analysis identifies 13 new susceptibility loci for coronary artery disease	Schunkert et al. (2011) [52]	CARDIoGRAM only	CAD	rs7250581	G	VSTM2B	1.023	0.986	1.06	0.224
Novel risk genes identified in a genome-wide association study for coronary artery disease in patients with type 1 diabetes	Charmet et al. (2018) [30]	Discovery stage only	CAD in T1DM	rs72689147	G	GUCY1A3	1.13	0.919	1.39	0.122
A comprehensive 1,000 Genomes-based genome-wide association meta-analysis of coronary artery disease	Nikpay et al. (2015) [5]		CAD	rs72689147	G	GUCY1A3	1.07	1.05	1.1	6.07e-09
Genome-wide association study identifies a missense variant at APOA5 for coronary artery disease in Multi-Ethnic Cohorts from Southeast Asia	Han et al. (2017) [36]	Discovery & validation stages	CAD	rs72743461	A	SMAD3	0.89	0.75	1.05	0.157
Association analyses based on false discovery rate implicate new loci for coronary artery disease.	Nelson et al. (2017) [46]		CAD	rs72743461	A	SMAD3	0.93	0.91	0.95	4.64e-12
Identification of 64 Novel Genetic Loci Provides an Expanded View on the Genetic Architecture of Coronary Artery Disease	van der Harst and Verweij (2018) [15]		CAD	rs72743461	A	SMAD3(0)	0.944027	0.931346	0.956881	5.676e-17
Association analyses based on false discovery rate implicate new loci for coronary artery disease.	Nelson et al. (2017) [46]		CAD	rs73045269	T	CCDC97	1.06	1.04	1.09	8.22e-07
Identification of 64 Novel Genetic Loci Provides an Expanded View on the Genetic Architecture of Coronary Artery Disease	van der Harst and Verweij (2018) [15]		CAD	rs73045269	T	CCDC97(0)	1.07251	1.05355	1.09181	1.269e-14
Association analyses based on false discovery rate implicate new loci for coronary artery disease.	Nelson et al. (2017) [46]		CAD	rs7412	T	APOE	0.88	0.85	0.9	1.63e-16
Identification of 64 Novel Genetic Loci Provides an Expanded View on the Genetic Architecture of Coronary Artery Disease	van der Harst and Verweij (2018) [15]		CAD	rs7412	T	APOC1(-5.841kb)|APOE(0)|TOMM40(+5.133kb)	0.851888	0.831759	0.872504	3.018e-39
Identification of 26 novel loci that confer susceptibility to early-onset coronary artery disease in a Japanese population	Yamada et al. (2018b) [63]		Early-onset CAD	rs7412	T	APOE	0.56	0.42	0.76	0.0001
Association analyses based on false discovery rate implicate new loci for coronary artery disease.	Nelson et al. (2017) [46]		CAD	rs742115	T	NEDD9	0.97	0.95	0.98	4.14e-05
Identification of 64 Novel Genetic Loci Provides an Expanded View on the Genetic Architecture of Coronary Artery Disease	van der Harst and Verweij (2018) [15]		CAD	rs742115	T	NEDD9(0)	0.967442	0.955195	0.979846	3.975e-07
Identification of 13 novel susceptibility loci for early-onset myocardial infarction, hypertension, or chronic kidney disease	Yamada et al. (2018a) [62]		MI	rs74416240	A	TCHP	1.46	1.23	1.73	0.0001
Identification of 26 novel loci that confer susceptibility to early-onset coronary artery disease in a Japanese population	Yamada et al. (2018b) [63]		Early-onset CAD	rs74416240	A	TCHP	1.35	1.15	1.58	0.0002
Genome-wide association study of coronary artery disease among individuals with diabetes: the UK Biobank	Fall et al. (2018) [18]	CAD+DM vs DM	CAD	rs74617384	T	LPA	1.38	1.26	1.51	3.2e-12
LPA Variants are Associated with Residual Cardiovascular Risk in Patients Receiving Statins	Wei et al. (2018) [59]	Validation stage only	CHD during statin therapy	rs74617384	T	LPA	1.71	1.14	2.57	0.0093
LPA Variants are Associated with Residual Cardiovascular Risk in Patients Receiving Statins	Wei et al. (2018) [59]	Discovery stage only	CHD during statin therapy	rs74617384	T	LPA	1.58	1.35	1.86	3.2e-10
Genetic analysis in UK Biobank links insulin resistance and transendothelial migration pathways to coronary artery disease	Klarin et al. (2017) [41]	UK Biobank & Stage 3	CAD	rs748431	G	FGD5	1.05	1.03	1.07	2.63e-08
Association analyses based on false discovery rate implicate new loci for coronary artery disease.	Nelson et al. (2017) [46]		CAD	rs748431	G	FGD5	1.04167	1.02041	1.06383	9.68e-07
Novel risk genes identified in a genome-wide association study for coronary artery disease in patients with type 1 diabetes	Charmet et al. (2018) [30]	Discovery stage only	CAD in T1DM	rs7500448	A	CDH13	1.09	0.894	1.321	0.202
Genetic analysis in UK Biobank links insulin resistance and transendothelial migration pathways to coronary artery disease	Klarin et al. (2017) [41]	UK Biobank & Stage 3	CAD	rs7500448	A	CDH13	1.06	1.04	1.09	1.2e-08
Association analyses based on false discovery rate implicate new loci for coronary artery disease.	Nelson et al. (2017) [46]		CAD	rs7500448	A	CDH13	1.06383	1.04167	1.08696	2.89e-09
Identification of 64 Novel Genetic Loci Provides an Expanded View on the Genetic Architecture of Coronary Artery Disease	van der Harst and Verweij (2018) [15]		CAD	rs7500448	A	CDH13(0)	1.06535	1.04939	1.08155	1.635e-16
Novel risk genes identified in a genome-wide association study for coronary artery disease in patients with type 1 diabetes	Charmet et al. (2018) [30]	Discovery stage only	CAD in T1DM	rs7528419	A	SORT1	1.11	0.918	1.348	0.138
Association analyses based on false discovery rate implicate new loci for coronary artery disease.	Nelson et al. (2017) [46]		CAD	rs7528419	A	CELSR2	1.11	1.09	1.14	3.57e-27
A comprehensive 1,000 Genomes-based genome-wide association meta-analysis of coronary artery disease	Nikpay et al. (2015) [5]		CAD	rs7528419	A	SORT1	1.12	1.1	1.15	1.97e-23
Association analyses based on false discovery rate implicate new loci for coronary artery disease.	Nelson et al. (2017) [46]		CAD	rs7538207	T	CELA3B	0.91	0.87	0.95	1.02e-05
Identification of 64 Novel Genetic Loci Provides an Expanded View on the Genetic Architecture of Coronary Artery Disease	van der Harst and Verweij (2018) [15]		CAD	rs7538207	T	CELA3B(0)	0.929787	0.89826	0.96242	3.668e-05
Novel risk genes identified in a genome-wide association study for coronary artery disease in patients with type 1 diabetes	Charmet et al. (2018) [30]	Discovery stage only	CAD in T1DM	rs7568458	A	GGCX	1.06	0.904	1.247	0.232
Association analyses based on false discovery rate implicate new loci for coronary artery disease.	Nelson et al. (2017) [46]		CAD	rs7568458	A	GGCX	1.06	1.05	1.08	2.3e-13
A comprehensive 1,000 Genomes-based genome-wide association meta-analysis of coronary artery disease	Nikpay et al. (2015) [5]		CAD	rs7568458	A	VAMP5-VAMP8-GGCX	1.06	1.04	1.08	3.62e-10
Novel risk genes identified in a genome-wide association study for coronary artery disease in patients with type 1 diabetes	Charmet et al. (2018) [30]	Discovery stage only	CAD in T1DM	rs7623687	A	RHOA	0.96	0.756	1.212	0.626
Genetic analysis in UK Biobank links insulin resistance and transendothelial migration pathways to coronary artery disease	Klarin et al. (2017) [41]	UK Biobank & Stage 3	CAD	rs7623687	A	RHOA	1.08	1.05	1.1	2e-08
Association analyses based on false discovery rate implicate new loci for coronary artery disease.	Nelson et al. (2017) [46]		CAD	rs7623687	A	RHOA	1.076	1.052	1.101	3.44e-10
Identification of 64 Novel Genetic Loci Provides an Expanded View on the Genetic Architecture of Coronary Artery Disease	van der Harst and Verweij (2018) [15]		CAD	rs7623687	A	AMT(-5.644kb)|RHOA(0)|TCTA(-1.072kb)	1.05432	1.03528	1.07372	1.118e-08
Novel risk genes identified in a genome-wide association study for coronary artery disease in patients with type 1 diabetes	Charmet et al. (2018) [30]	Discovery stage only	CAD in T1DM	rs7678555	C	MAD2L1	0.92	0.77	1.1	0.818
Genetic analysis in UK Biobank links insulin resistance and transendothelial migration pathways to coronary artery disease	Klarin et al. (2017) [41]	UK Biobank & Stage 3	CAD	rs7678555	C	MAD2L1 (Intergenic)	1.06	1.04	1.08	2.91e-08
Association analyses based on false discovery rate implicate new loci for coronary artery disease.	Nelson et al. (2017) [46]		CAD	rs7678555	C	PDE5A-MAD2L1	1.052	1.034	1.07	1.32e-08
Identification of 64 Novel Genetic Loci Provides an Expanded View on the Genetic Architecture of Coronary Artery Disease	van der Harst and Verweij (2018) [15]		CAD	rs7678555	C	-	1.0498	1.03692	1.06284	1.229e-14
Shared genetic susceptibility to ischemic stroke and coronary artery disease: a genome-wide analysis of common variants	Dichgans et al. (2014) [32]		CAD	rs7692387	G	GUCY1A3	1.08696	1.04167	1.1236	1.07e-05
Genome-wide association study of coronary artery disease among individuals with diabetes: the UK Biobank	Fall et al. (2018) [18]	CAD+DM vs DM	CAD	rs7692387	G	GUCY1A3	1.08	1.01	1.16
Genome-wide association study of coronary artery disease among individuals with diabetes: the UK Biobank	Fall et al. (2018) [18]	CAD+DM vs non-DM	CAD	rs7692387	G	GUCY1A3	1.06	1.03	1.08
Genome-wide association study identifies a missense variant at APOA5 for coronary artery disease in Multi-Ethnic Cohorts from Southeast Asia	Han et al. (2017) [36]	Discovery & validation stages	CAD	rs7692387	G	GUCY1A3	1.07527	0.990099	1.01	0.099
Identification of 64 Novel Genetic Loci Provides an Expanded View on the Genetic Architecture of Coronary Artery Disease	van der Harst and Verweij (2018) [15]		CAD	rs7692387	G	GUCY1A3(0)	1.07111	0.94669	1.05631	4.137e-22
Association analyses based on false discovery rate implicate new loci for coronary artery disease.	Nelson et al. (2017) [46]		CAD	rs781622	T	MIR3134	1.03093	1.02041	1.05263	2.75e-05
Identification of 64 Novel Genetic Loci Provides an Expanded View on the Genetic Architecture of Coronary Artery Disease	van der Harst and Verweij (2018) [15]		CAD	rs781622	T	MIR3134(0)|SUSD1(0)	1.02881	1.01558	1.0422	1.791e-05
SNPs on chromosome 5p15.3 associated with myocardial infarction in Japanese population	Aoki et al. (2011) [14]	Stage 2 only	MI	rs7865618	A		1.078	0.928038	1.2522	0.34
Genomewide association analysis of coronary artery disease	Samani et al. (2007) [51]	WTCC & German MI Family Study	CAD+MI	rs7865618	A		1.26	1.18	1.35	1.9e-11
A genome-wide association study identifies LIPA as a susceptibility gene for coronary artery disease	Wild et al. (2011) [60]	GWAS, Replication 1 & 2	CAD	rs7865618	A	MTAP	1.18	1.14	1.21	1.72e-27
Identification of 13 novel susceptibility loci for early-onset myocardial infarction, hypertension, or chronic kidney disease	Yamada et al. (2018a) [62]		MI	rs7969300	C	ATXN2	0.44	0.34	0.57	0.0001
Identification of 26 novel loci that confer susceptibility to early-onset coronary artery disease in a Japanese population	Yamada et al. (2018b) [63]		Early-onset CAD	rs7969300	C	ATXN2	0.57	0.45	0.71	0.0001
Association analyses based on false discovery rate implicate new loci for coronary artery disease.	Nelson et al. (2017) [46]		CAD	rs79716828	C	RFX8	1.12	1.06	1.17	1.08e-05
Identification of 64 Novel Genetic Loci Provides an Expanded View on the Genetic Architecture of Coronary Artery Disease	van der Harst and Verweij (2018) [15]		CAD	rs79716828	C	.	1.05792	1.02084	1.09633	0.002018
Novel risk genes identified in a genome-wide association study for coronary artery disease in patients with type 1 diabetes	Charmet et al. (2018) [30]	Discovery stage only	CAD in T1DM	rs8042271	G	ABHD2	0.93	0.602	1.457	0.613
Genome-wide association study of coronary artery disease among individuals with diabetes: the UK Biobank	Fall et al. (2018) [18]	CAD+DM vs DM	CAD	rs8042271	G	MFGE8-ABHD2	0.96	0.84	1.11
Genome-wide association study of coronary artery disease among individuals with diabetes: the UK Biobank	Fall et al. (2018) [18]	CAD+DM vs non-DM	CAD	rs8042271	G	MFGE8-ABHD2	1.05	1	1.11
Genome-wide association study identifies a missense variant at APOA5 for coronary artery disease in Multi-Ethnic Cohorts from Southeast Asia	Han et al. (2017) [36]	Discovery & validation stages	CAD	rs8042271	G	MFGE8-ABHD2	1.07527	0.990099	1.17647	0.066
A comprehensive 1,000 Genomes-based genome-wide association meta-analysis of coronary artery disease	Nikpay et al. (2015) [5]		CAD	rs8042271	G	MFGE8-ABHD2	1.1	1.06	1.14	3.68e-08
Identification of 64 Novel Genetic Loci Provides an Expanded View on the Genetic Architecture of Coronary Artery Disease	van der Harst and Verweij (2018) [15]		CAD	rs8042271	G	.	1.07745	1.04891	1.10678	4.728e-08
Genome-wide association study of 14,000 cases of seven common diseases and 3,000 shared controls	Burton et al. (2007) [29]		CAD	rs8055236	G		2.23	1.56	3.17	5.6e-06
Genomewide association analysis of coronary artery disease	Samani et al. (2007) [51]	German MI Family Study only	MI	rs8055236	G		1	0.86	1.16	0.99
Genomewide association analysis of coronary artery disease	Samani et al. (2007) [51]	WTCC only	CAD	rs8055236	G		1.27	1.14	1.41	9.73e-06
Large-scale association analysis identifies 13 new susceptibility loci for coronary artery disease	Schunkert et al. (2011) [52]	CARDIoGRAM only	CAD	rs8055236	G	CDH13	1.039	1.004	1.075	0.0273
Novel risk genes identified in a genome-wide association study for coronary artery disease in patients with type 1 diabetes	Charmet et al. (2018) [30]	Discovery stage only	CAD in T1DM	rs8108632	T	TGFB1	1.11	0.938	1.307	0.113
Genetic analysis in UK Biobank links insulin resistance and transendothelial migration pathways to coronary artery disease	Klarin et al. (2017) [41]	UK Biobank & Stage 3	CAD	rs8108632	T	TGFB1	1.05	1.03	1.07	2.35e-08
Association analyses based on false discovery rate implicate new loci for coronary artery disease.	Nelson et al. (2017) [46]		CAD	rs8108632	T	TGFB1	1.05263	1.04167	1.07527	1.56e-09
Association analyses based on false discovery rate implicate new loci for coronary artery disease.	Nelson et al. (2017) [46]		CAD	rs833509	T	DYM	0.96	0.94	0.98	9.74e-06
Identification of 64 Novel Genetic Loci Provides an Expanded View on the Genetic Architecture of Coronary Artery Disease	van der Harst and Verweij (2018) [15]		CAD	rs833509	T	.	0.960886	0.947606	0.974351	2.288e-08
Novel risk genes identified in a genome-wide association study for coronary artery disease in patients with type 1 diabetes	Charmet et al. (2018) [30]	Discovery stage only	CAD in T1DM	rs867186	G	PROCR	1.26	0.974	1.623	0.961
Identification of 64 Novel Genetic Loci Provides an Expanded View on the Genetic Architecture of Coronary Artery Disease	van der Harst and Verweij (2018) [15]		CAD	rs867186	G	PROCR(0)	0.938943	0.922345	0.955841	4.589e-12
SNPs on chromosome 5p15.3 associated with myocardial infarction in Japanese population	Aoki et al. (2011) [14]	Stage 2 only	MI	rs886126	T		1.17499	1.0521	1.31222	0.0045
A genome-wide association study of a coronary artery disease risk variant	Lee et al. (2013) [42]		CAD	rs886126	T	CUX2	1.14	1.08	1.2	1.03e-06
SNPs on chromosome 5p15.3 associated with myocardial infarction in Japanese population	Aoki et al. (2011) [14]	Stage 2 only	MI	rs916524	T		1.16135	0.958134	1.40768	0.13
A genome-wide association study identifies LIPA as a susceptibility gene for coronary artery disease	Wild et al. (2011) [60]	GWAS	CAD	rs916524	T	intergenic	1.18	1.07	1.3	0.000818
Identification of 64 Novel Genetic Loci Provides an Expanded View on the Genetic Architecture of Coronary Artery Disease	van der Harst and Verweij (2018) [15]		CAD	rs918949	T	TNS1(0)	0.964737	0.952524	0.977106	2.902e-08
Identification of 26 novel loci that confer susceptibility to early-onset coronary artery disease in a Japanese population	Yamada et al. (2018b) [63]		Early-onset CAD	rs918949	T	TNS1	0.79	0.68	0.92	0.0028
Identification of 13 novel susceptibility loci for early-onset myocardial infarction, hypertension, or chronic kidney disease	Yamada et al. (2018a) [62]		MI	rs925368	C	GIT2	1.49	1.25	1.79	0.0001
Identification of 26 novel loci that confer susceptibility to early-onset coronary artery disease in a Japanese population	Yamada et al. (2018b) [63]		Early-onset CAD	rs925368	C	GIT2	1.37	1.16	1.61	0.0001
Novel risk genes identified in a genome-wide association study for coronary artery disease in patients with type 1 diabetes	Charmet et al. (2018) [30]	Discovery stage only	CAD in T1DM	rs9319428	A	FLT1	1.03	0.874	1.227	0.339
Shared genetic susceptibility to ischemic stroke and coronary artery disease: a genome-wide analysis of common variants	Dichgans et al. (2014) [32]		CAD	rs9319428	A	FLT1	1.06	1.03	1.11	4.47e-05
Genome-wide association study of coronary artery disease among individuals with diabetes: the UK Biobank	Fall et al. (2018) [18]	CAD+DM vs DM	CAD	rs9319428	A	FLT1	1.04	0.98	1.1
Genome-wide association study of coronary artery disease among individuals with diabetes: the UK Biobank	Fall et al. (2018) [18]	CAD+DM vs non-DM	CAD	rs9319428	A	FLT1	1.02	1	1.04
Genome-wide association study identifies a missense variant at APOA5 for coronary artery disease in Multi-Ethnic Cohorts from Southeast Asia	Han et al. (2017) [36]	Discovery & validation stages	CAD	rs9319428	A	FLT1	1.05	0.97	1.14	0.212
A genome-wide association study identifies PLCL2 and AP3D1-DOT1L-SF3A2 as new susceptibility loci for myocardial infarction in Japanese	Hirokawa et al. (2015) [19]		MI	rs9319428	A	FLT1	1.02	0.93	1.11	0.746
Identification of 64 Novel Genetic Loci Provides an Expanded View on the Genetic Architecture of Coronary Artery Disease	van der Harst and Verweij (2018) [15]		CAD	rs9319428	A	FLT1(0)	1.03666	1.02554	1.04789	5.363e-11
Novel risk genes identified in a genome-wide association study for coronary artery disease in patients with type 1 diabetes	Charmet et al. (2018) [30]	Discovery stage only	CAD in T1DM	rs9349379	G	PHACTR1	1.07	0.919	1.267	0.174
Genome-wide association study in a Lebanese cohort confirms PHACTR1 as a major determinant of coronary artery stenosis	Hager et al. (2012) [35]	All patients underwent coronary catheterization	CAD severity	rs9349379	G	PHACTR1	1.338	1.22	1.47	8.02e-10
Genome-wide association study identifies a missense variant at APOA5 for coronary artery disease in Multi-Ethnic Cohorts from Southeast Asia	Han et al. (2017) [36]	Discovery & validation stages	CAD	rs9349379	G	PHACTR1	1.15	1.07	1.23	0.000197
Genetic analysis in UK Biobank links insulin resistance and transendothelial migration pathways to coronary artery disease	Klarin et al. (2017) [41]	UK Biobank	CAD	rs9349379	G	PHACTR1	1.15	1.11	1.2	3.4e-11
Genome-wide association study in Han Chinese identifies four new susceptibility loci for coronary artery disease	Lu et al. (2012) [44]	Discovery & replications 1,2	CAD	rs9349379	G	PHACTR1	1.15	1.1	1.21	1.76e-09
Association analyses based on false discovery rate implicate new loci for coronary artery disease.	Nelson et al. (2017) [46]		CAD	rs9349379	G	PHACTR1	1.11	1.09	1.13	6.11e-36
A comprehensive 1,000 Genomes-based genome-wide association meta-analysis of coronary artery disease	Nikpay et al. (2015) [5]		CAD	rs9349379	G	PHACTR1	1.14	1.12	1.16	1.81e-42
Genome-wide association study for coronary artery calcification with follow-up in myocardial infarction	O'Donnell et al. (2011) [47]		MI	rs9349379	G	PHACTR1	1.12975	1.06733	1.19583	2.06e-05
Risk loci for coronary artery calcification replicated at 9p21 and 6q24 in the Heinz Nixdorf Recall Study	Pechlivanis et al. (2013) [48]		CAC	rs9349379	G	PHACTR1	1.26	1.14	1.4	1.47e-05
Identification of 64 Novel Genetic Loci Provides an Expanded View on the Genetic Architecture of Coronary Artery Disease	van der Harst and Verweij (2018) [15]		CAD	rs9349379	G	PHACTR1(0)	1.12806	1.11378	1.14252	2.975e-77
Shared genetic risk between migraine and coronary artery disease: A genome-wide analysis of common variants	Winsvold et al. (2017) [61]	CARDIoGRAM only	CAD	rs9349379	G	PHACTR1	1.09746	1.05942	1.13687	1.54e-07
Shared genetic risk between migraine and coronary artery disease: A genome-wide analysis of common variants	Winsvold et al. (2017) [61]	C4D only	CAD	rs9349379	G	PHACTR1	1.17234	1.13392	1.21206	6.5e-21
Identification of 26 novel loci that confer susceptibility to early-onset coronary artery disease in a Japanese population	Yamada et al. (2018b) [63]		Early-onset CAD	rs9349379	G	PHACTR1	1.25	1.07527	1.44928	0.0029
Shared genetic susceptibility to ischemic stroke and coronary artery disease: a genome-wide analysis of common variants	Dichgans et al. (2014) [32]		CAD	rs9369640	C	PHACTR1	0.91	0.88	0.93	2.69e-11
Identification of 26 novel loci that confer susceptibility to early-onset coronary artery disease in a Japanese population	Yamada et al. (2018b) [63]		Early-onset CAD	rs9369640	C	PHACTR1	0.73	0.6	0.9	0.0025
Genome-wide association study identifies a missense variant at APOA5 for coronary artery disease in Multi-Ethnic Cohorts from Southeast Asia	Han et al. (2017) [36]	Discovery stage only	CAD	rs944797	C	CDKN2B-AS1	1.211	1.13652	1.28548	4.59e-07
A genome-wide association study identifies PLCL2 and AP3D1-DOT1L-SF3A2 as new susceptibility loci for myocardial infarction in Japanese	Hirokawa et al. (2015) [19]		MI	rs944797	C	9p21.3	1.21	1.11	1.31	2.37e-05
A genome-wide association study of a coronary artery disease risk variant	Lee et al. (2013) [42]		CAD	rs944797	C		1.26	1.16	1.36	2.11e-08
Genome-wide association study of coronary artery disease in the Japanese	Takeuchi et al. (2012) [54]		CAD	rs944797	C	CDKN2A/B	1.25	1.18	1.31	6.1e-16
Association analyses based on false discovery rate implicate new loci for coronary artery disease.	Nelson et al. (2017) [46]		CAD	rs9501744	T	FOXC1	0.94	0.91	0.96	1.26e-06
Identification of 64 Novel Genetic Loci Provides an Expanded View on the Genetic Architecture of Coronary Artery Disease	van der Harst and Verweij (2018) [15]		CAD	rs9501744	T	FOXC1	0.95	0.93	0.96	2.2e-08
Novel risk genes identified in a genome-wide association study for coronary artery disease in patients with type 1 diabetes	Charmet et al. (2018) [30]	Discovery stage only	CAD in T1DM	rs9515203	T	COL4A2	1.2	0.983	1.468	0.036
Shared genetic susceptibility to ischemic stroke and coronary artery disease: a genome-wide analysis of common variants	Dichgans et al. (2014) [32]		CAD	rs9515203	T	COL4A1/COL4A2	1.08696	1.04167	1.1236	3.3e-05
Genome-wide association study of coronary artery disease among individuals with diabetes: the UK Biobank	Fall et al. (2018) [18]	CAD+DM vs DM	CAD	rs9515203	T	COL4A1/A2	1.02	0.97	1.09
Genome-wide association study of coronary artery disease among individuals with diabetes: the UK Biobank	Fall et al. (2018) [18]	CAD+DM vs non-DM	CAD	rs9515203	T	COL4A1/A2	1.03	1	1.05
Association analyses based on false discovery rate implicate new loci for coronary artery disease.	Nelson et al. (2017) [46]		CAD	rs9515203	T	COL4A2	1.06	1.04	1.08	7.32e-10
Identification of 64 Novel Genetic Loci Provides an Expanded View on the Genetic Architecture of Coronary Artery Disease	van der Harst and Verweij (2018) [15]		CAD	rs9515203	T	COL4A2(0)	1.06141	1.049	1.07397	3.893e-23
Association analyses based on false discovery rate implicate new loci for coronary artery disease.	Nelson et al. (2017) [46]		CAD	rs9591012	A	N4BP2L2	0.96	0.95	0.98	1.22e-05
Identification of 64 Novel Genetic Loci Provides an Expanded View on the Genetic Architecture of Coronary Artery Disease	van der Harst and Verweij (2018) [15]		CAD	rs9591012	A	N4BP2L2,PDS5B	0.96	0.94	0.97	7e-11
Genome-wide association study in Han Chinese identifies four new susceptibility loci for coronary artery disease	Lu et al. (2012) [44]	Discovery & replications 1,2	CAD	rs9632884	C	CDKN2A/B	1.36	1.29	1.43	1.41e-33
Genomewide association analysis of coronary artery disease	Samani et al. (2007) [51]	WTCC & German MI Family Study	CAD+MI	rs9632884	C		1.34	1.26	1.44	4.68e-18
Genome-wide association study of coronary artery disease among individuals with diabetes: the UK Biobank	Fall et al. (2018) [18]	CAD+DM vs DM	CAD	rs964184	G	ZNF259-APOA5-APOA1	0.99	0.92	1.07
Genome-wide association study of coronary artery disease among individuals with diabetes: the UK Biobank	Fall et al. (2018) [18]	CAD+DM vs non-DM	CAD	rs964184	G	ZNF259-APOA5-APOA1	1.05	1.02	1.08
Genome-wide association study identifies a missense variant at APOA5 for coronary artery disease in Multi-Ethnic Cohorts from Southeast Asia	Han et al. (2017) [36]	Discovery & validation stages	CAD	rs964184	G	ZNF259-APOA5-APOA1	1.03093	0.95	1.12	0.477
A genome-wide association study of a coronary artery disease risk variant	Lee et al. (2013) [42]		CAD	rs964184	G	APOA1-C3-A4-A5	1.13	1.03	1.24	0.01
Association analyses based on false discovery rate implicate new loci for coronary artery disease.	Nelson et al. (2017) [46]		CAD	rs964184	G	ZNF259	1.05263	1.03	1.08	5.21e-06
A comprehensive 1,000 Genomes-based genome-wide association meta-analysis of coronary artery disease	Nikpay et al. (2015) [5]		CAD	rs964184	G	ZNF259-APOA5-APOA1	1.05	1.03	1.08	5.6e-05
Association between a genetic variant related to glutamic acid metabolism and coronary heart disease in individuals with type 2 diabetes	Qi et al. (2013) [11]	Stage 1 and 2	CHD	rs964184	G	ZNF259, APOA5-A4-C3-A1	1.08	0.9	1.29	0.43
Large-scale association analysis identifies 13 new susceptibility loci for coronary artery disease	Schunkert et al. (2011) [52]	CARDIoGRAM and replication	CAD	rs964184	G	ZNF259,APOA5-A4-C3-A1	1.13	1.1	1.16	1.02e-17
Identification of 64 Novel Genetic Loci Provides an Expanded View on the Genetic Architecture of Coronary Artery Disease	van der Harst and Verweij (2018) [15]		CAD	rs964184	G	BUD13(+5.203kb)|ZPR1(-0.358kb)	1.06332	1.05	1.08	2.14e-12
Shared genetic susceptibility to ischemic stroke and coronary artery disease: a genome-wide analysis of common variants	Dichgans et al. (2014) [32]		CAD	rs974819	T	PDGFD	1.05	1.02	1.08	0.0007
Genome-wide association study of coronary artery disease among individuals with diabetes: the UK Biobank	Fall et al. (2018) [18]	CAD+DM vs DM	CAD	rs974819	T	PDGFD	1.05	0.99	1.11
Genome-wide association study of coronary artery disease among individuals with diabetes: the UK Biobank	Fall et al. (2018) [18]	CAD+DM vs non-DM	CAD	rs974819	T	PDGFD	1.06	1.04	1.08
Genome-wide association study identifies a missense variant at APOA5 for coronary artery disease in Multi-Ethnic Cohorts from Southeast Asia	Han et al. (2017) [36]	Discovery & validation stages	CAD	rs974819	T	PDGFD	1.1111	1.04167	1.19048	0.00252
A genome-wide association study identifies PLCL2 and AP3D1-DOT1L-SF3A2 as new susceptibility loci for myocardial infarction in Japanese	Hirokawa et al. (2015) [19]		MI	rs974819	T	PDGFD	0.93	0.85	1.02	0.122
A genome-wide association study of a coronary artery disease risk variant	Lee et al. (2013) [42]		CAD	rs974819	T	PDGFD	1.15	1.06	1.24	0.00079
A genome-wide association study in europeans and South asians identifies five new loci for coronary artery disease	Peden et al. (2011) [49]		CAD	rs974819	T	PDGFD	1.07	1.04	1.09	2.41e-09
Association between a genetic variant related to glutamic acid metabolism and coronary heart disease in individuals with type 2 diabetes	Qi et al. (2013) [11]	Stage 1 and 2	CHD	rs974819	T	PDGFD	1.08	0.93	1.25	0.33
Identification of 64 Novel Genetic Loci Provides an Expanded View on the Genetic Architecture of Coronary Artery Disease	van der Harst and Verweij (2018) [15]		CAD	rs974819	T	.	1.07519	1.06075	1.08983	1.193e-25
Shared genetic susceptibility to ischemic stroke and coronary artery disease: a genome-wide analysis of common variants	Dichgans et al. (2014) [32]		CAD	rs9818870	T	MRAS	1.11	1.07	1.15	1.24e-07
New susceptibility locus for coronary artery disease on chromosome 3q22.3	Erdmann et al. (2009) [33]	Stage 1	CAD	rs9818870		MRAS	1.15	1.11	1.19	7.44e-13
Genome-wide association study of coronary artery disease among individuals with diabetes: the UK Biobank	Fall et al. (2018) [18]	CAD+DM vs DM	CAD	rs9818870	T	MRAS	1.04	0.97	1.12
Genome-wide association study of coronary artery disease among individuals with diabetes: the UK Biobank	Fall et al. (2018) [18]	CAD+DM vs non-DM	CAD	rs9818870	T	MRAS	1.07	1.04	1.09
Association between a genetic variant related to glutamic acid metabolism and coronary heart disease in individuals with type 2 diabetes	Qi et al. (2013) [11]	Stage 1 and 2	CHD	rs9818870	T	MRAS	1.02	0.86	1.22	0.82
Identification of ADAMTS7 as a novel locus for coronary atherosclerosis and association of ABO with myocardial infarction in the presence of coronary atherosclerosis: two genome-wide association studies	Reilly et al. (2011) [50]	CAD+MI vs CAD-MI	MI in CHD	rs9818870	T	MRAS	0.96	0.89	1.04	0.25
Identification of ADAMTS7 as a novel locus for coronary atherosclerosis and association of ABO with myocardial infarction in the presence of coronary atherosclerosis: two genome-wide association studies	Reilly et al. (2011) [50]	Angio. CAD vs non-CAD	CAD	rs9818870	T	MRAS	1.15	1.03	1.27	0.009773
Novel risk genes identified in a genome-wide association study for coronary artery disease in patients with type 1 diabetes	Charmet et al. (2018) [30]	Discovery stage only	CAD in T1DM	rs9970807	C	PPAP2B	1.21	0.904	1.625	0.098
Genome-wide association study identifies a missense variant at APOA5 for coronary artery disease in Multi-Ethnic Cohorts from Southeast Asia	Han et al. (2017) [36]	Discovery & validation stages	CAD	rs9970807	C	PPAP2B	1.14943	0.961538	1.36986	0.125
A comprehensive 1,000 Genomes-based genome-wide association meta-analysis of coronary artery disease	Nikpay et al. (2015) [5]		CAD	rs9970807	C	PPAP2B	1.13	1.1	1.17	5e-14
Identification of 64 Novel Genetic Loci Provides an Expanded View on the Genetic Architecture of Coronary Artery Disease	van der Harst and Verweij (2018) [15]		CAD	rs9970807	C	PPAP2B(0)	1.12176	1.09719	1.14688	3.411e-24
Shared genetic susceptibility to ischemic stroke and coronary artery disease: a genome-wide analysis of common variants	Dichgans et al. (2014) [32]		CAD	rs9982601	T	gene_desert/KCNE2	1.18	1.12	1.24	2.52e-10
Genome-wide association study of coronary artery disease among individuals with diabetes: the UK Biobank	Fall et al. (2018) [18]	CAD+DM vs non-DM	CAD	rs9982601	T	KCNE2(gene_desert)	1.1	1.07	1.13
Genome-wide association study of coronary artery disease among individuals with diabetes: the UK Biobank	Fall et al. (2018) [18]	CAD+DM vs DM	CAD	rs9982601	T	KCNE2(gene_desert)	1.16	1.08	1.25
Genome-wide association of early-onset myocardial infarction with single nucleotide polymorphisms and copy number variants	Kathiresan et al. (2009) [39]		Early-onset MI	rs9982601	T	SLC5A3-MRPS6-KCNE2	1.2	1.14	1.27	6.4e-11
Association between a genetic variant related to glutamic acid metabolism and coronary heart disease in individuals with type 2 diabetes	Qi et al. (2013) [11]	Stage 1 and 2	CHD	rs9982601	T	MRPS6-SCL5A3-KCNE2	1.03	0.84	1.26	0.77
Identification of ADAMTS7 as a novel locus for coronary atherosclerosis and association of ABO with myocardial infarction in the presence of coronary atherosclerosis: two genome-wide association studies	Reilly et al. (2011) [50]	CAD+MI vs CAD-MI	MI in CHD	rs9982601	T	SLC5A3, MRPS6, KCNE2	1.07	0.97	1.18	0.15
Identification of ADAMTS7 as a novel locus for coronary atherosclerosis and association of ABO with myocardial infarction in the presence of coronary atherosclerosis: two genome-wide association studies	Reilly et al. (2011) [50]	Angio. CAD vs non-CAD	CAD	rs9982601	T	SLC5A3, MRPS6, KCNE2	1.18	1.07	1.3	0.001106
Large-scale association analysis identifies 13 new susceptibility loci for coronary artery disease	Schunkert et al. (2011) [52]	CARDIoGRAM only	CAD	rs9982601	T	MRPS6	1.18	1.12	1.24	4.22e-10
Identification of 64 Novel Genetic Loci Provides an Expanded View on the Genetic Architecture of Coronary Artery Disease	van der Harst and Verweij (2018) [15]		CAD	rs9982601	T	.	1.09757	1.07796	1.11754	3.9e-24
A genome-wide association study reveals susceptibility loci for myocardial infarction/coronary artery disease in Saudi Arabs	Wakil et al. (2016) [57]		MI	rs9982601	T	KCNE2	1.38	1.23	1.55	3.49e-08

## Sheet: Table S2
		Heterogeneity				Model			Effect Size			Egger's Test		Begg's Test
SNPs	EA	I2	Q	DF	P-het	Model	z	P-value	OR	Lower	Upper	Intercept	P-value	Kendall Tau	P-value
rs10139550	G	0	1.8296	2	0.4006	Fixed	9.299	1e-05	1.023	1.018	1.027	-0.9611	0.541	-0.3333	0.6015
rs10168194	C	4.44e-14	1	1	0.3173	Fixed	5.75	1e-05	1.014	1.009	1.019	5	0.0001	1	0.3173
rs10237377	T	0	0.4652	1	0.4952	Fixed	-5.069	1e-05	0.985	0.979	0.991	-0.7429	0.0001	-1	0.3173
rs10455872	G	64.33	2.8038	1	0.094	Random	7.98	1e-05	1.112	1.083	1.141	-4.5	0.0001	-1	0.3173
rs1050362	A	0	0.6555	1	0.4182	Fixed	7.555	1e-05	1.015	1.011	1.019	0.8571	0.0001	1	0.3173
rs10738609	G	0	0.1643	1	0.6852	Fixed	8.643	1e-05	1.095	1.073	1.118	1.8	0.0001	1	0.3173
rs10757264	G	10.8	1.1211	1	0.2897	Fixed	10.765	1e-05	1.079	1.064	1.094	2.5714	0.0001	1	0.3173
rs10757270	G	0	0.4235	1	0.5152	Fixed	9.32	1e-05	1.089	1.069	1.108	-6	0.0001	-1	0.3173
rs10757272	T	84.47	25.7534	4	0.0001	Random	5.207	1e-05	1.114	1.069	1.16	1.5067	0.5599	0	1
rs10757274	G	97.1	137.901	4	1e-05	Random	2.15	0.032	1.066	1.006	1.13	-13.3919	0.2223	-0.4	0.3272
rs10757275	A	0	0.4041	1	0.525	Fixed	8.481	1e-05	1.096	1.073	1.119	4.6667	0.0001	1	0.3173
rs10774610	C	0	0.8658	1	0.3521	Fixed	3.918	0.0001	1.195	1.093	1.306	12.1429	0.0001	1	0.3173
rs10840293	A	56.14	6.8403	3	0.08	Random	6.097	1e-05	1.02	1.013	1.026	-3.4031	0.3053	-0.1826	0.7098
rs10841443	G	0	0.06775	2	0.9667	Fixed	11.414	1e-05	1.022	1.018	1.025	-0.5	0.7211	0	1
rs10849915	C	0	0.8999	1	0.3428	Fixed	3.541	0.0004	1.177	1.076	1.289	12.5714	0.0001	1	0.3173
rs10857147	T	0	1.0719	3	0.7839	Fixed	11.23	1e-05	1.023	1.019	1.027	-0.1053	0.9044	0.2	0.6836
rs1088868	G	75	4	1	0.0455	Random	2.336	0.02	1.012	1.002	1.022	10	0.0001	1	0.3173
rs10947262	T	8.27	1.0901	1	0.2964	Fixed	4.326	0.0001	1.079	1.042	1.116	1.9615	0.0001	1	0.3173
rs10947789	T	81.06	15.8385	3	0.0012	Random	2.572	0.01	1.016	1.004	1.028	1.3748	0.631	-0.1826	0.7098
rs10965212	A	10.03	1.1115	1	0.2917	Fixed	12.552	1e-05	1.091	1.076	1.106	2.8333	0.0001	1	0.3173
rs10965215	A	49.83	1.9931	1	0.158	Fixed	12.511	1e-05	1.092	1.077	1.108	3.4286	0.0001	1	0.3173
rs10965219	G	6.59	2.1412	2	0.3428	Fixed	13.425	1e-05	1.095	1.08	1.109	-0.6992	0.7847	-0.3333	0.6015
rs11042937	T	0	0.03971	1	0.8421	Fixed	6.039	1e-05	1.018	1.012	1.024	0.2188	0.0001	1	0.3173
rs11057401	A	28.56	2.7995	2	0.2467	Fixed	-10.216	1e-05	0.981	0.977	0.985	-7.5	0.09	-0.8165	0.2008
rs11057830	A	16.33	1.1951	1	0.2743	Fixed	10.651	1e-05	1.034	1.028	1.04	-7	0.0001	-1	0.3173
rs11065979	T	0	0.04	1	0.8415	Fixed	12.35	1e-05	1.03	1.025	1.035	-1	0.0001	-1	0.3173
rs11066001	C	0	0.05732	1	0.8108	Fixed	14.298	1e-05	1.163	1.139	1.187	-0.6	0.0001	-1	0.3173
rs11099493	A	0	0.64	1	0.4237	Fixed	7.683	1e-05	1.019	1.014	1.023	4	0.0001	1	0.3173
rs111245230	C	0	0.2416	1	0.623	Fixed	7.842	1e-05	1.046	1.034	1.058	2	0.0001	1	0.3173
rs11170820	G	0	0.25	1	0.6171	Fixed	8.375	1e-05	1.041	1.031	1.051	-2.5	0.0001	-1	0.3173
rs11172113	C	0	0.16	1	0.6892	Fixed	6.55	1e-05	1.016	1.011	1.021	2	0.0001	1	0.3173
rs11191416	T	0	1.6706	2	0.4337	Fixed	8.527	1e-05	1.033	1.025	1.041	-1.3935	0.089	-1	0.1172
rs11206510	T	77.64	53.6646	12	1e-05	Random	4.825	1e-05	1.027	1.016	1.039	1.1143	0.2483	-0.1307	0.5339
rs112635299	T	0	0.327	1	0.5674	Fixed	-7.846	1e-05	0.939	0.925	0.954	-1.375	0.0001	-1	0.3173
rs112941079	A	0	0	1	1	Fixed	8.112	1e-05	1.027	1.021	1.034	1.7764e-15	0.0001	0	1
rs11509880	A	0	0.8889	1	0.3458	Fixed	7.071	1e-05	1.015	1.011	1.019	0	1	0	1
rs115287176	A	0	0.6673	1	0.414	Fixed	-10.013	1e-05	0.158	0.11	0.227	-27.3636	0.0001	-1	0.3173
rs11556924	C	79.66	49.1716	10	1e-05	Random	6.249	1e-05	1.027	1.018	1.036	-0.2556	0.8441	0.01906	0.935
rs11591147	T	45.41	1.832	1	0.1759	Fixed	-12.044	1e-05	0.893	0.877	0.91	8.6667	0.0001	1	0.3173
rs11617955	T	0	0.0669	2	0.9671	Fixed	11.851	1e-05	1.036	1.03	1.042	0.6157	0.1068	1	0.1172
rs116843064	A	0	0.003378	1	0.9537	Fixed	-8.644	1e-05	0.932	0.917	0.947	-0.25	0.0001	-1	0.3173
rs11728590	G	63.27	2.7222	1	0.099	Random	3.857	0.0001	1.014	1.007	1.021	0	1	0	1
rs11752643	T	26.32	1.3573	1	0.244	Fixed	6.313	1e-05	1.117	1.08	1.157	2.8824	0.0001	1	0.3173
rs11810571	G	0	0.3508	3	0.9502	Fixed	9.297	1e-05	1.023	1.018	1.028	0.0132	0.9793	-0.1826	0.7098
rs11823828	G	0	0.003358	1	0.9538	Fixed	11.551	1e-05	1.475	1.381	1.575	0.3636	0.0001	1	0.3173
rs11838776	A	67.06	6.0708	2	0.0481	Random	4.66	1e-05	1.03	1.017	1.042	2.6216	0.1853	0.8165	0.2008
rs12146487	A	16.33	1.1951	1	0.2743	Fixed	-5.677	1e-05	0.982	0.976	0.988	-7	0.0001	-1	0.3173
rs1214752	T	28	1.3889	1	0.2386	Fixed	-7.307	1e-05	0.985	0.981	0.989	0	1	0	1
rs12190287	C	91.59	59.441	5	1e-05	Random	2.685	0.007	1.026	1.007	1.045	2.2601	0.2258	-0.06667	0.851
rs12202017	A	0	1.3496	2	0.5093	Fixed	7.716	1e-05	1.03	1.022	1.038	0.2171	0.8636	0.3333	0.6015
rs12229654	G	43.83	1.7802	1	0.1821	Fixed	6.475	1e-05	1.336	1.224	1.458	17.1429	0.0001	1	0.3173
rs12231744	T	63.85	2.766	1	0.0963	Random	-4.72	1e-05	0.722	0.631	0.827	-15.3333	0.0001	-1	0.3173
rs12413409	G	76.41	21.1923	5	0.0007	Random	3.121	0.002	1.035	1.013	1.057	1.6484	0.1772	-0.3333	0.3476
rs12493885	C	18.7	3.6901	3	0.2969	Fixed	11.788	1e-05	1.032	1.026	1.037	-1.971	0.0492	-0.5477	0.2643
rs1250229	T	30.21	4.2987	3	0.231	Fixed	13.777	1e-05	1.029	1.025	1.033	-2.0412	0.0702	-0.2	0.6836
rs12524865	C	57.47	4.7022	2	0.0953	Random	4.507	1e-05	1.041	1.023	1.059	2.6804	0.0824	1	0.1172
rs12526453	C	89.27	37.2722	4	1e-05	Random	2.876	0.004	1.03	1.01	1.052	3.1329	0.1191	0	1
rs12619842	C	0	0.2393	2	0.8872	Fixed	-8.53	1e-05	0.978	0.973	0.983	2.5	0.1867	0.8165	0.2008
rs12801636	A	0	0.3145	3	0.9573	Fixed	-8.965	1e-05	0.981	0.977	0.985	0.2415	0.5776	0.3333	0.4969
rs12922	A	16.33	1.1951	1	0.2743	Fixed	5.677	1e-05	1.018	1.012	1.024	7	0.0001	1	0.3173
rs12936587	G	64.73	14.1776	5	0.0145	Random	3.596	0.0003	1.017	1.008	1.027	-0.3558	0.7826	0.138	0.6973
rs13003675	T	0	0.2222	1	0.6374	Fixed	7.542	1e-05	1.016	1.012	1.02	0	1	0	1
rs1333042	G	90.8	76.0594	7	1e-05	Random	5.839	1e-05	1.095	1.062	1.129	0.7565	0.7969	-0.2857	0.3223
rs1333048	A	0	3.9816	4	0.4085	Fixed	-17.768	1e-05	0.892	0.881	0.903	-0.2011	0.862	0	1
rs1333049	C	92.23	115.78	9	1e-05	Random	10.419	1e-05	1.116	1.093	1.139	3.2239	0.0716	0.3596	0.1478
rs13723	G	48	1.9231	1	0.1655	Fixed	9.892	1e-05	1.017	1.013	1.02	-5	0.0001	-1	0.3173
rs13734	A	0	0	1	1	Fixed	7.083	1e-05	1.017	1.012	1.022	0	0.0001	0	1
rs1378942	A	0	0.3077	1	0.5791	Fixed	-5.778	1e-05	0.99	0.987	0.994	-2	0.0001	-1	0.3173
rs140570886	C	81.36	5.3634	1	0.0206	Random	6.573	1e-05	1.272	1.184	1.367	3.8947	0.0001	1	0.3173
rs1412444	T	92.79	110.962	8	1e-05	Random	2.609	0.009	1.017	1.004	1.031	1.2984	0.4492	-0.2778	0.2971
rs1412834	T	0	0.4872	1	0.4852	Fixed	-6.24	1e-05	0.927	0.905	0.949	1.8182	0.0001	1	0.3173
rs142695226	G	2.88	1.0297	1	0.3102	Fixed	5.929	1e-05	1.03	1.02	1.04	-1.1304	0.0001	-1	0.3173
rs143803699	G	39	1.6394	1	0.2004	Fixed	5.022	1e-05	1.041	1.025	1.057	7	0.0001	1	0.3173
rs146092501	T	0	0.6967	1	0.4039	Fixed	-10.257	1e-05	0.157	0.11	0.224	0	1	0	1
rs146879198	A	0	0.6673	1	0.414	Fixed	-10.013	1e-05	0.158	0.11	0.227	-27.3636	0.0001	-1	0.3173
rs147555597	A	77.39	4.4231	1	0.0355	Random	5.279	1e-05	1.159	1.097	1.224	-8	0.0001	-1	0.3173
rs1537372	T	0	0.5959	1	0.4402	Fixed	8.686	1e-05	1.098	1.075	1.122	5.6667	0.0001	1	0.3173
rs1537373	G	0	0.07206	1	0.7884	Fixed	6.856	1e-05	1.084	1.06	1.11	-0.875	0.0001	-1	0.3173
rs1537376	C	0	0.5558	1	0.456	Fixed	8.091	1e-05	1.094	1.07	1.117	4.25	0.0001	1	0.3173
rs1561198	T	88.17	25.3614	3	0.0001	Random	3.197	0.001	1.02	1.008	1.032	2.349	0.505	0	1
rs167479	T	0	0.01111	1	0.9161	Fixed	-6.641	1e-05	0.981	0.976	0.987	0.1667	0.0001	1	0.3173
rs16986953	A	73.45	22.5991	6	0.0009	Random	6.705	1e-05	1.035	1.024	1.045	0.8389	0.6383	-0.09759	0.7582
rs17087335	T	66.93	9.0721	3	0.0283	Random	2.506	0.012	1.016	1.003	1.029	0.8589	0.6061	0	1
rs17114036	A	92.1	50.6033	4	1e-05	Random	2.518	0.012	1.048	1.01	1.087	2.5024	0.3267	0	1
rs17411031	C	0	0.5829	1	0.4452	Fixed	4.544	1e-05	1.022	1.013	1.032	1.0714	0.0001	1	0.3173
rs17464857	T	0	0.5389	1	0.4629	Fixed	6.535	1e-05	1.013	1.009	1.017	0.766	0.0001	1	0.3173
rs17465637	C	89.1	73.369	8	1e-05	Random	5.149	1e-05	1.035	1.022	1.049	2.1664	0.1444	0.02817	0.9158
rs17514846	A	84.21	31.6617	5	1e-05	Random	3.172	0.002	1.019	1.007	1.031	0.767	0.6125	-0.06667	0.851
rs17517928	C	0	0.64	1	0.4237	Fixed	9.35	1e-05	1.023	1.018	1.028	4	0.0001	1	0.3173
rs17581137	A	0	0.02941	1	0.8638	Fixed	6.711	1e-05	1.017	1.012	1.023	0.5	0.0001	1	0.3173
rs17608766	C	48.22	1.9314	1	0.1646	Fixed	6.596	1e-05	1.02	1.014	1.026	-1.4792	0.0001	-1	0.3173
rs17678683	G	18.34	4.8983	4	0.2979	Fixed	10.378	1e-05	1.031	1.025	1.037	1.3964	0.2876	0.7379	0.0707
rs17843797	G	0	0	1	1	Fixed	9.285	1e-05	1.029	1.023	1.036	2.6645e-15	0.0001	1	0.3173
rs1800449	T	36.61	3.1553	2	0.2065	Fixed	9.847	1e-05	1.025	1.02	1.029	1	0.9375	0	1
rs1800775	A	0	0.3922	1	0.5311	Fixed	-5.968	1e-05	0.982	0.977	0.988	0.6875	0.0001	1	0.3173
rs1801251	A	29.42	1.4169	1	0.2339	Fixed	6.12	1e-05	1.018	1.013	1.024	1.303	0.0001	1	0.3173
rs180803	G	0	2.8564	3	0.4143	Fixed	8.831	1e-05	1.074	1.057	1.091	-0.7221	0.5356	-0.3333	0.4969
rs186696265	T	45.13	1.8225	1	0.177	Fixed	23.675	1e-05	1.255	1.232	1.279	-6.75	0.0001	-1	0.3173
rs1867624	T	22.67	1.2931	1	0.2555	Fixed	7.949	1e-05	1.016	1.012	1.02	-1.2059	0.0001	-1	0.3173
rs1870634	G	65.47	5.7913	2	0.0553	Random	8.085	1e-05	1.027	1.02	1.033	9.5	0.3258	0.8165	0.2008
rs1878406	T	82.73	11.5817	2	0.0031	Random	2.007	0.045	1.026	1.001	1.052	1.8636	0.543	0.3333	0.6015
rs188378669	T	0	0.7302	1	0.3928	Fixed	-10.472	1e-05	0.158	0.112	0.224	-25.0833	0.0001	-1	0.3173
rs1892094	T	48.81	1.9536	1	0.1622	Fixed	-7.933	1e-05	0.984	0.98	0.988	1.4848	0.0001	1	0.3173
rs192210727	T	0	0.05152	1	0.8204	Fixed	-8.195	1e-05	0.307	0.231	0.407	-1.4889	0.0001	-1	0.3173
rs1924981	T	0	0	1	1	Fixed	7.425	1e-05	1.021	1.016	1.027	0	1	0	1
rs194937	A	0	0.7813	1	0.3768	Fixed	6.541	1e-05	1.019	1.013	1.024	0	1	0	1
rs1964272	G	25.62	1.3445	1	0.2462	Fixed	4.902	1e-05	1.02	1.012	1.028	-1.3125	0.0001	-1	0.3173
rs199921354	T	0	0.7302	1	0.3928	Fixed	-10.472	1e-05	0.158	0.112	0.224	-25.0833	0.0001	-1	0.3173
rs2000999	A	0	0.125	1	0.7237	Fixed	8.485	1e-05	1.024	1.019	1.03	0	1	0	1
rs200787930	T	0	0.7302	1	0.3928	Fixed	-10.472	1e-05	0.158	0.112	0.224	-25.0833	0.0001	-1	0.3173
rs2011559	G	59	2.439	1	0.1183	Random	3.123	0.002	1.016	1.006	1.026	10	0.0001	1	0.3173
rs2023938	C	86.49	14.8079	2	0.0006	Random	2.156	0.031	1.023	1.002	1.045	2.0116	0.6506	0.3333	0.6015
rs2048327	C	67.13	9.1271	3	0.0276	Random	3.122	0.002	1.02	1.007	1.033	0.836	0.6201	0	1
rs2072134	T	0	0.2036	1	0.6518	Fixed	3.414	0.0006	1.225	1.09	1.377	6	0.0001	1	0.3173
rs2074356	T	86.29	14.5926	2	0.0007	Random	3.574	0.0004	1.291	1.122	1.485	4.7483	0.2377	1	0.1172
rs2107595	A	0	4.3167	6	0.6339	Fixed	17.497	1e-05	1.033	1.029	1.036	-0.5651	0.4229	-0.1952	0.5382
rs2128739	A	0	0.36	1	0.5485	Fixed	12.883	1e-05	1.031	1.027	1.036	-3	0.0001	-1	0.3173
rs2153219	A	0	0.2195	1	0.6394	Fixed	6.458	1e-05	1.02	1.014	1.027	3	0.0001	1	0.3173
rs216172	C	86.37	36.6926	5	1e-05	Random	2.14	0.032	1.02	1.002	1.039	1.4574	0.3815	0.06667	0.851
rs2241714	T	0	0.05556	1	0.8137	Fixed	9.664	1e-05	1.021	1.016	1.025	0	1	0	1
rs2244608	G	0	0.08681	3	0.9934	Fixed	12.669	1e-05	1.022	1.018	1.025	0	1	0	1
rs2246833	T	30.56	1.44	1	0.2301	Fixed	6.942	1e-05	1.034	1.024	1.044	6	0.0001	1	0.3173
rs2246942	G	0	0.16	1	0.6892	Fixed	13.217	1e-05	1.032	1.027	1.037	2	0.0001	1	0.3173
rs2252641	C	79.33	24.1931	5	0.0002	Random	2.747	0.006	1.013	1.004	1.023	0.3793	0.8055	-0.276	0.4367
rs2257129	C	0	0.6402	2	0.7261	Fixed	9.073	1e-05	1.037	1.029	1.045	3.9054	0.0928	1	0.1172
rs2259816	T	2.6	1.0267	1	0.3109	Fixed	5.812	1e-05	1.035	1.023	1.047	1.2917	0.0001	1	0.3173
rs2306374	T	77.56	13.3712	3	0.0039	Random	-3.414	0.0006	0.972	0.956	0.988	0.3787	0.8969	0	1
rs2315065	A	84.35	6.388	1	0.0115	Random	4.551	1e-05	1.108	1.06	1.158	-15	0.0001	-1	0.3173
rs2327429	T	89.2	9.2603	1	0.0023	Random	3.314	0.0009	1.044	1.018	1.071	5.2	0.0001	1	0.3173
rs2383206	G	25.78	4.0422	3	0.2569	Fixed	11.76	1e-05	1.091	1.075	1.107	-2.4843	0.3511	-0.3333	0.4969
rs2383207	G	0	1.1711	2	0.5568	Fixed	10.159	1e-05	1.096	1.076	1.115	0.6829	0.6841	-0.3333	0.6015
rs246600	T	0	0.7323	1	0.3921	Fixed	10.468	1e-05	1.021	1.017	1.025	-0.9091	0.0001	-1	0.3173
rs2487928	A	0	0.1007	2	0.9509	Fixed	10.191	1e-05	1.025	1.02	1.03	0.3071	0.2953	1	0.1172
rs2505083	C	85.03	26.7164	4	0.0001	Random	2.411	0.016	1.018	1.003	1.033	1.4117	0.416	0	1
rs2519093	T	0	1.3554	2	0.5078	Fixed	9.552	1e-05	1.03	1.024	1.037	-0.7851	0.5774	-0.3333	0.6015
rs2523644	G	0	0.5097	1	0.4753	Fixed	7.056	1e-05	1.247	1.173	1.326	9	0.0001	1	0.3173
rs2571445	A	0	0.006923	1	0.9337	Fixed	9.019	1e-05	1.018	1.014	1.022	0.08824	0.0001	1	0.3173
rs2596548	T	0	0.7704	1	0.3801	Fixed	7.576	1e-05	1.316	1.226	1.413	12.8	0.0001	1	0.3173
rs2616407	C	0	0.5	1	0.4795	Fixed	6.718	1e-05	1.019	1.014	1.025	0	1	0	1
rs264	G	74.01	15.3901	4	0.004	Random	3.333	0.0009	1.024	1.01	1.039	-0.05379	0.977	-0.1054	0.7963
rs2681472	G	0	1.0822	2	0.5821	Fixed	9.807	1e-05	1.031	1.024	1.037	-0.9309	0.5475	-0.3333	0.6015
rs2727020	C	0	0.7353	1	0.3912	Fixed	5.568	1e-05	1.014	1.009	1.02	2.5	0.0001	1	0.3173
rs273909	G	83.96	31.1631	5	1e-05	Random	2.586	0.01	1.018	1.004	1.031	1.364	0.4273	-0.2	0.573
rs2789422	A	28	1.3889	1	0.2386	Fixed	-7.307	1e-05	0.985	0.981	0.989	0	1	0	1
rs2820315	T	0	0.3334	2	0.8464	Fixed	9.796	1e-05	1.016	1.013	1.02	-0.402	0.4931	-0.3333	0.6015
rs2843152	C	0	0	1	1	Fixed	6.997	1e-05	1.018	1.013	1.023	0	0.0001	-1	0.3173
rs28451064	A	11.46	4.5176	4	0.3405	Fixed	18.912	1e-05	1.057	1.051	1.063	1.8079	0.0027	0.8	0.05
rs288187	T	0	0.3077	1	0.5791	Fixed	-4.576	1e-05	0.985	0.978	0.991	-2	0.0001	-1	0.3173
rs2891168	G	86.44	59.0103	8	1e-05	Random	13.398	1e-05	1.09	1.076	1.103	1.2182	0.4919	0.05556	0.8348
rs2895811	C	94	83.3942	5	1e-05	Random	2.836	0.005	1.018	1.005	1.03	2.5113	0.3253	-0.3333	0.3476
rs2954029	A	87.2	39.0617	5	1e-05	Random	3.81	1e-05	1.021	1.01	1.032	1.4803	0.5123	-0.2	0.573
rs2972146	T	0	0.64	1	0.4237	Fixed	9.817	1e-05	1.024	1.019	1.029	-4	0.0001	-1	0.3173
rs3130683	T	57.61	4.7178	2	0.0945	Random	4.316	0.0001	1.03	1.016	1.044	-1.8819	0.3455	-0.3333	0.6015
rs3133293	T	0	0.7353	1	0.3912	Fixed	-5.568	1e-05	0.986	0.981	0.991	-2.5	0.0001	-1	0.3173
rs3184504	T	86.31	21.9074	3	0.0001	Random	3.328	0.0009	1.023	1.009	1.037	-1.1667	0.7965	-0.3333	0.4969
rs3217992	T	95.21	41.786	2	1e-05	Random	2.068	0.04	1.043	1.002	1.086	3.5415	0.5631	0.3333	0.6015
rs35146811	C	0	0.2222	1	0.6374	Fixed	7.542	1e-05	1.016	1.012	1.02	0	1	0	1
rs35465346	A	0	0.6098	1	0.4349	Fixed	-6.067	1e-05	0.981	0.975	0.987	-5	0.0001	-1	0.3173
rs35489971	A	0	0.2195	1	0.6394	Fixed	6.458	1e-05	1.02	1.014	1.027	3	0.0001	1	0.3173
rs35895680	C	30.56	1.44	1	0.2301	Fixed	8.817	1e-05	1.021	1.017	1.026	6	0.0001	1	0.3173
rs3739998	G	94.08	16.9	1	0.0001	Random	2.083	0.04	1.041	1.002	1.082	6.5	0.0001	1	0.3173
rs3782774	G	0	0.5	1	0.4795	Fixed	7.307	1e-05	1.016	1.011	1.02	0	1	0	1
rs3782886	G	97.83	230.723	5	1e-05	Random	2.276	0.023	1.159	1.021	1.316	2.773	0.6989	0.4667	0.1885
rs3798220	C	99.12	456.057	4	1e-05	Random	2.118	0.03	1.112	1.008	1.226	6.5818	0.5172	0.1054	0.7963
rs3809346	A	21.94	1.281	1	0.2577	Fixed	7.842	1e-05	1.023	1.014	1.035	1.5556	0.0001	1	0.3173
rs3918226	T	75.26	16.1696	4	0.0028	Random	4.661	1e-05	1.044	1.025	1.063	-2.1541	0.3638	-0.527	0.1967
rs3993105	T	0	0.03188	1	0.8583	Fixed	5.008	1e-05	1.02	1.012	1.028	-0.2	0.0001	-1	0.3173
rs41272114	T	0	0.2195	1	0.6394	Fixed	-8.379	1e-05	0.949	0.937	0.961	-3	0.0001	-1	0.3173
rs421329	T	0	0.5	1	0.4795	Fixed	-7.778	1e-05	0.984	0.98	0.988	0	1	0	1
rs425105	C	0	0.5	1	0.4795	Fixed	6.718	1e-05	1.019	1.014	1.025	0	1	0	1
rs4252120	T	89.36	28.1882	3	1e-05	Random	2.797	0.005	1.019	1.006	1.033	1.1842	0.7461	0	1
rs4252185	C	0	0.237	1	0.6264	Fixed	6.254	1e-05	1.096	1.065	1.127	-0.6531	0.0001	-1	0.3173
rs4299376	T	0	0	1	1	Fixed	-10.417	1e-05	0.975	0.971	0.98	1.7764e-15	0.0001	0	1
rs4380028	C	0	1.0566	2	0.5896	Fixed	10.378	1e-05	1.027	1.022	1.032	-0.6803	0.5705	-0.3333	0.6015
rs4420638	G	0	0.7881	2	0.6743	Fixed	12.212	1e-05	1.041	1.035	1.048	0.9399	0.0919	1	0.1172
rs445925	G	47.04	1.8882	1	0.1694	Fixed	8.456	1e-05	1.017	1.013	1.021	-1.4259	0.0001	-1	0.3173
rs4593108	C	0	2.9619	5	0.7059	Fixed	10.61	1e-05	1.028	1.023	1.033	-1.1091	0.0159	-0.7143	0.0441
rs4773141	G	0	0.04	1	0.8415	Fixed	10.683	1e-05	1.026	1.021	1.031	-1	0.0001	-1	0.3173
rs4773144	G	89.67	48.3908	5	1e-05	Random	2.38	0.02	1.022	1.004	1.04	1.8359	0.3656	-0.2	0.573
rs4845625	T	94.43	53.8158	3	1e-05	Random	2.393	0.017	1.015	1.003	1.027	3.2866	0.4233	0	1
rs4977574	G	98.43	889.524	14	1e-05	Random	6.377	1e-05	1.071	1.049	1.094	4.187	0.0961	-0.1723	0.3708
rs501120	T	91.94	62.0023	5	1e-05	Random	3.661	0.0003	1.038	1.018	1.059	3.2557	0.1084	0.06667	0.851
rs507666	A	63.15	8.1414	3	0.0432	Random	7.376	1e-05	1.039	1.028	1.049	2.3841	0.072	0.6667	0.1742
rs514659	C	7.79	1.0844	1	0.2977	Fixed	5.691	1e-05	1.079	1.051	1.107	-2.4286	0.0001	-1	0.3173
rs515135	C	71.3	10.4513	3	0.0151	Random	3.333	0.0009	1.019	1.008	1.03	-0.5598	0.8182	-0.3333	0.4969
rs518394	G	34.47	1.526	1	0.2167	Fixed	10.859	1e-05	1.08	1.065	1.095	3	0.0001	1	0.3173
rs523096	A	0	0.1788	1	0.6724	Fixed	12.651	1e-05	1.084	1.07	1.097	0.875	0.0001	1	0.3173
rs55730499	T	79.32	14.5068	3	0.0023	Random	8.661	1e-05	1.132	1.101	1.164	-2.5102	0.302	-0.6667	0.1742
rs55940034	G	0	0.02703	1	0.8694	Fixed	6.309	1e-05	1.025	1.017	1.033	-0.2	0.0001	-1	0.3173
rs56062135	C	94.75	76.2298	4	1e-05	Random	3.478	0.0005	1.025	1.011	1.039	4.4268	0.1272	-0.2	0.6242
rs56131196	A	35.94	1.561	1	0.2115	Fixed	10.846	1e-05	1.034	1.028	1.041	-8	0.0001	-1	0.3173
rs56210063	C	0	0.1882	1	0.6644	Fixed	5.86	1e-05	1.027	1.018	1.036	4	0.0001	1	0.3173
rs56289821	G	0	0.146	2	0.9296	Fixed	14.35	1e-05	1.06	1.052	1.068	-0.3791	0.2552	-1	0.1172
rs56313611	T	0	0.3077	1	0.5791	Fixed	-7.28	1e-05	0.976	0.97	0.982	-2	0.0001	-1	0.3173
rs56336142	T	0	0.08411	2	0.9588	Fixed	5.947	1e-05	1.029	1.019	1.039	-0.2368	0.2465	-1	0.1172
rs56393506	T	13.19	1.152	1	0.2831	Fixed	13.103	1e-05	1.06	1.051	1.07	-2.4	0.0001	-1	0.3173
rs564398	T	0	0.9031	1	0.3419	Fixed	12.075	1e-05	1.09	1.075	1.106	2.125	0.0001	1	0.3173
rs571353	T	0	0.02941	1	0.8638	Fixed	-7.283	1e-05	0.981	0.977	0.986	0.5	0.0001	1	0.3173
rs59898454	A	56.21	2.2838	1	0.1307	Fixed	5.995	1e-05	1.05	1.033	1.067	6.5	0.0001	1	0.3173
rs599839	A	81.44	21.5557	4	0.0002	Random	4.37	0.0001	1.085	1.046	1.126	3.0848	0.0673	0.6	0.1416
rs602633	T	95.8	71.4309	3	1e-05	Random	-4.074	0.0001	0.956	0.935	0.977	-4.6993	0.3417	-0.3333	0.4969
rs6129767	G	0	0	1	1	Fixed	7.083	1e-05	1.017	1.012	1.022	0	0.0001	0	1
rs61734696	T	0	0.6967	1	0.4039	Fixed	-10.257	1e-05	0.157	0.11	0.224	0	1	0	1
rs62076439	T	0	0	1	1	Fixed	9.899	1e-05	1.021	1.017	1.025	0	1	0	1
rs62253653	A	50	2	1	0.1573	Fixed	7.071	1e-05	1.015	1.011	1.019	0	1	0	1
rs634552	G	0	0.3902	1	0.5322	Fixed	7.504	1e-05	1.024	1.017	1.03	-4	0.0001	-1	0.3173
rs643319	C	61.95	2.6281	1	0.105	Random	5.609	1e-05	1.082	1.053	1.113	3.625	0.0001	1	0.3173
rs646776	T	84.05	50.1658	8	1e-05	Random	3.758	0.0002	1.049	1.023	1.076	1.1211	0.4443	0.1111	0.6767
rs6475606	T	93.88	65.4079	4	1e-05	Random	4.01	0.0001	1.099	1.05	1.151	2.9225	0.4367	0	1
rs6494488	A	0	0.195	1	0.6588	Fixed	6.318	1e-05	1.019	1.013	1.025	-0.4694	0.0001	-1	0.3173
rs6504218	G	0	0	1	1	Fixed	7.083	1e-05	1.017	1.012	1.022	0	0.0001	0	1
rs6511720	T	0	1.4205	2	0.4915	Fixed	-15.937	1e-05	0.945	0.939	0.952	1.3152	0.0757	0.8165	0.2008
rs6538176	T	69.14	3.24	1	0.0719	Random	3.594	0.0003	1.016	1.007	1.025	9	0.0001	1	0.3173
rs6544713	T	85.14	20.1917	3	0.0002	Random	3.435	0.0006	1.017	1.007	1.027	0.3381	0.9084	-0.1826	0.7098
rs657152	C	0	0.4596	1	0.4978	Fixed	-6.244	1e-05	0.932	0.912	0.953	3.2	0.0001	1	0.3173
rs6689306	A	0	0.5	1	0.4795	Fixed	8.132	1e-05	1.023	1.018	1.029	0	1	0	1
rs671	A	91.78	24.3191	2	1e-05	Random	3.401	0.0007	1.314	1.123	1.538	4.3675	0.2385	1	0.1172
rs67180937	G	59.13	7.3408	3	0.0618	Random	9.858	1e-05	1.036	1.029	1.043	2.5911	0.3946	0.3333	0.4969
rs6725887	C	87.35	71.1414	9	1e-05	Random	3.399	0.0007	1.042	1.018	1.068	1.8837	0.0807	-0.2444	0.3252
rs68170813	T	5.56	1.0588	1	0.3035	Fixed	6.448	1e-05	1.017	1.012	1.022	3	0.0001	1	0.3173
rs6841581	A	0	0	1	1	Fixed	12.828	1e-05	1.034	1.028	1.039	1.7764e-15	0.0001	0	1
rs6905288	A	0	0.64	1	0.4237	Fixed	8.15	1e-05	1.02	1.015	1.025	-4	0.0001	-1	0.3173
rs6909752	A	0	0.5481	2	0.7603	Fixed	8.356	1e-05	1.02	1.015	1.025	-0.3168	0.7397	0.3333	0.6015
rs6922269	A	89.86	29.5823	3	1e-05	Random	2.955	0.003	1.067	1.022	1.113	4.765	0.1413	0.6667	0.1742
rs7044859	A	46.39	1.8652	1	0.172	Fixed	7.54	1e-05	1.091	1.066	1.116	-10.6667	0.0001	-1	0.3173
rs7173743	T	93.24	59.142	4	1e-05	Random	4.297	0.0001	1.027	1.015	1.039	2.728	0.3159	0	1
rs7212798	C	0	0.7588	2	0.6843	Fixed	5.648	1e-05	1.033	1.022	1.045	-0.4872	0.5696	-1	0.1172
rs7214245	T	0	0.09249	1	0.761	Fixed	4.253	0.0001	1.017	1.009	1.025	-0.3636	0.0001	-1	0.3173
rs72689147	G	0	0.269	1	0.604	Fixed	5.891	1e-05	1.03	1.02	1.04	0.5854	0.0001	1	0.3173
rs72743461	A	0	1.865	2	0.3936	Fixed	-10.509	1e-05	0.973	0.969	0.978	-1.0722	0.4524	-0.3333	0.6015
rs73045269	T	0	0.6098	1	0.4349	Fixed	8.98	1e-05	1.028	1.022	1.035	-5	0.0001	-1	0.3173
rs7412	T	82.26	11.277	2	0.0036	Random	-5.65	1e-05	0.933	0.911	0.956	-2.7712	0.4468	-0.3333	0.6015
rs742115	T	0	0.05556	1	0.8137	Fixed	-6.364	1e-05	0.987	0.982	0.991	0	1	0	1
rs74416240	A	0	0.4331	1	0.5105	Fixed	5.656	1e-05	1.157	1.1	1.217	11.3333	0.0001	1	0.3173
rs74617384	T	76.16	4.1946	1	0.0406	Random	4.534	1e-05	1.12	1.066	1.176	8.3333	0.0001	1	0.3173
rs748431	G	0	0.2195	1	0.6394	Fixed	6.348	1e-05	1.02	1.014	1.026	-3	0.0001	-1	0.3173
rs7500448	A	0	0.1851	3	0.98	Fixed	11.65	1e-05	1.027	1.022	1.032	0.1254	0.7066	0.1826	0.7098
rs7528419	A	0	0.3221	2	0.8512	Fixed	13.335	1e-05	1.048	1.041	1.055	-0.05263	0.9479	0	1
rs7538207	T	0	0.4939	1	0.4822	Fixed	-5.685	1e-05	0.965	0.953	0.977	-4.5	0.0001	-1	0.3173
rs7568458	A	0	0	2	1	Fixed	10.44	1e-05	1.025	1.021	1.03	0	1	1	0.1172
rs7623687	A	24.6	3.9785	3	0.2638	Fixed	10.664	1e-05	1.029	1.023	1.034	-0.5518	0.7427	0.1826	0.7098
rs7678555	C	0	2.7693	3	0.4286	Fixed	10.787	1e-05	1.022	1.018	1.027	-1.3276	0.2482	-0.1826	0.7098
rs7692387	G	93.78	48.2309	3	1e-05	Random	3.78	0.0002	1.027	1.013	1.041	1.4132	0.7765	-0.1826	0.7098
rs781622	T	0	0.05556	1	0.8137	Fixed	5.893	1e-05	1.013	1.008	1.017	0	1	0	1
rs7865618	A	56.3	4.5763	2	0.1015	Random	5.727	1e-05	1.08	1.052	1.108	-0.1822	0.9524	-0.3333	0.6015
rs7969300	C	54.19	2.1827	1	0.1396	Random	-5.275	1e-05	0.743	0.665	0.829	-18.8333	0.0001	-1	0.3173
rs79716828	C	70.4	3.3784	1	0.0661	Random	2.841	0.005	1.036	1.011	1.062	8.3333	0.0001	1	0.3173
rs8042271	G	67.88	12.4537	4	0.0143	Random	3.052	0.002	1.027	1.009	1.044	-0.5264	0.7857	-0.3162	0.4386
rs8108632	T	0	0.4323	2	0.8056	Fixed	7.672	1e-05	1.022	1.016	1.028	0.7121	0.1733	0.8165	0.2008
rs833509	T	0	0.02941	1	0.8638	Fixed	-6.711	1e-05	0.983	0.978	0.988	-0.5	0.0001	-1	0.3173
rs886126	T	0	0.2347	1	0.628	Fixed	5.553	1e-05	1.061	1.039	1.084	1.0833	0.0001	1	0.3173
rs916524	T	0	0.021	1	0.8848	Fixed	3.602	0.0003	1.073	1.033	1.115	-0.3333	0.0001	-1	0.3173
rs925368	C	0	0.4475	1	0.5035	Fixed	5.722	1e-05	1.165	1.106	1.228	9	0.0001	1	0.3173
rs9319428	A	77.02	21.7603	5	0.0006	Random	2.83	0.005	1.013	1.004	1.023	0.6289	0.6576	-0.276	0.4367
rs9349379	G	93.47	168.57	11	1e-05	Random	6.405	1e-05	1.057	1.039	1.075	0.9375	0.632	-0.0458	0.8358
rs944797	C	0	1.0232	3	0.7956	Fixed	12.312	1e-05	1.096	1.08	1.112	-0.6103	0.7909	-0.1826	0.7098
rs9501744	T	0	0.4808	1	0.4881	Fixed	-7.072	1e-05	0.977	0.97	0.983	-2.5	0.0001	-1	0.3173
rs9515203	T	93.14	58.2837	4	1e-05	Random	3.129	0.002	1.024	1.009	1.039	4.0306	0.2273	-0.2	0.6242
rs9591012	A	0	0	1	1	Fixed	-8.485	1e-05	0.982	0.978	0.986	0	1	0	1
rs9632884	C	0	0.1416	1	0.7067	Fixed	14.83	1e-05	1.141	1.121	1.161	-1.75	0.0001	-1	0.3173
rs964184	G	83.63	42.7704	7	1e-05	Random	4.168	0.0001	1.026	1.014	1.039	0.7305	0.713	0.189	0.5127
rs974819	T	91.42	81.5501	7	1e-05	Random	3.737	0.0002	1.025	1.012	1.038	2.3007	0.143	-0.2143	0.4579
rs9818870	T	91.44	46.7338	4	1e-05	Random	2.36	0.018	1.032	1.005	1.059	2.3654	0.333	0.1054	0.7963
rs9970807	C	0	0.4139	3	0.9374	Fixed	12.685	1e-05	1.053	1.044	1.061	0.4506	0.1152	0.6667	0.1742
rs9982601	T	89.74	68.1992	7	1e-05	Random	5.706	1e-05	1.056	1.037	1.076	3.168	0.1015	0.5284	0.0672
rs10738607	G	98.35	60.5705	1	0.0001	Random	-0.131	0.896	0.988	0.82	1.19	-31.6667	0.0001	-1	0.3173
rs10746041	C	83.29	5.9827	1	0.01	Random	-1.455	0.146	0.878	0.736	1.046	-3.9348	0.0001	-1	0.3173
rs10757278	G	93.71	31.7956	2	1e-05	Random	0.594	0.552	1.024	0.948	1.105	-0.8031	0.8949	-0.3333	0.6015
rs10953541	C	87.22	46.933	6	1e-05	Random	0.946	0.344	1.009	0.99	1.029	0.5316	0.7395	0.1502	0.6357
rs11066015	A	97.95	97.6545	2	1e-05	Random	-0.0439	0.965	0.992	0.707	1.393	-7.801	0.6267	-1	0.1172
rs11066280	A	97.58	123.921	3	1e-05	Random	1.711	0.087	1.156	0.979	1.366	3.1713	0.6793	0.3333	0.4969
rs11203042	T	91.61	11.9189	1	0.0006	Random	1.306	0.192	1.014	0.993	1.035	4.2	0.0001	1	0.3173
rs1122608	G	94.25	121.842	7	1e-05	Random	1.932	0.053	1.023	1	1.048	1.416	0.4646	-0.03637	0.8997
rs12740374	T	84.2	12.656	2	0.0018	Random	-1.678	0.093	0.93	0.854	1.012	-0.7042	0.8335	-0.3333	0.6015
rs1333045	C	98.57	70.0139	1	1e-05	Random	0.0423	0.966	1.005	0.815	1.238	0	1	0	1
rs17228212	C	91.3	22.9853	2	0.0001	Random	1.271	0.204	1.026	0.986	1.068	7.1662	0.4152	0.3333	0.6015
rs1746048	C	94.6	129.712	7	1e-05	Random	1.748	0.08	1.025	0.997	1.054	2.7561	0.4019	0.03637	0.8997
rs1746049	C	97.76	44.6021	1	1e-05	Random	0.0653	0.948	1.007	0.821	1.234	104	0.0001	1	0.3173
rs17609940	G	85.55	27.6752	4	0.0001	Random	1.782	0.075	1.021	0.998	1.045	1.6766	0.3372	0.2	0.6242
rs17672135	T	0	0.8866	2	0.6419	Fixed	1.865	0.062	1.016	0.999	1.034	0.7501	0.2849	1	0.1172
rs1831733	C	92.7	13.7024	1	0.0002	Random	1.881	0.06	1.051	0.998	1.107	4.8182	0.0001	1	0.3173
rs1842896	T	90.95	11.046	1	0.0009	Random	0.509	0.611	1.02	0.944	1.102	-6.0769	0.0001	-1	0.3173
rs1883838	T	91.53	11.8046	1	0.0006	Random	0.856	0.392	1.113	0.871	1.423	5.5778	0.0001	1	0.3173
rs1994016	C	72.97	3.6993	1	0.0544	Random	1.831	0.067	1.054	0.996	1.115	-3.1053	0.0001	-1	0.3173
rs2047009	G	96.8	31.2432	1	1e-05	Random	-0.441	0.66	0.993	0.96	1.026	-6.8	0.0001	-1	0.3173
rs2075650	G	74.88	7.9606	2	0.0187	Random	1.914	0.056	1.054	0.999	1.112	2.0886	0.1225	1	0.1172
rs220702	C	94.48	18.1041	1	0.0001	Random	-0.628	0.53	0.882	0.595	1.306	-6.9138	0.0001	-1	0.3173
rs2880099	A	92.07	12.6112	1	0.0004	Random	1.105	0.27	1.172	0.885	1.553	3.7403	0.0001	1	0.3173
rs2943634	C	95.1	40.7895	2	1e-05	Random	1.02	0.307	1.023	0.98	1.067	0.2679	0.9735	0.3333	0.6015
rs328	C	72.38	3.62	1	0.0571	Random	1.088	0.277	1.099	0.927	1.304	2.0111	0.0001	1	0.3173
rs3825807	A	97.12	69.4603	2	1e-05	Random	0.379	0.705	1.01	0.96	1.06	-2.4289	0.8338	-0.3333	0.6015
rs383830	T	86.48	14.7974	2	0.0006	Random	1.576	0.115	1.073	0.983	1.172	2.8266	0.401	1	0.1172
rs4244285	A	0	0.1426	1	0.7058	Fixed	0.827	0.408	1.025	0.967	1.087	-0.6364	0.0001	-1	0.3173
rs46522	T	82.65	23.0585	4	0.0001	Random	1.953	0.051	1.015	1	1.031	1.3776	0.4471	0.4	0.3272
rs579459	C	91.68	36.0512	3	1e-05	Random	1.672	0.095	1.024	0.996	1.053	2.5384	0.4009	0	1
rs590121	T	87.62	8.0771	1	0.0045	Random	-0.584	0.559	0.968	0.866	1.081	-3.0811	0.0001	-1	0.3173
rs629301	T	84.34	6.3848	1	0.0115	Random	1.431	0.152	1.113	0.961	1.289	8.3333	0.0001	1	0.3173
rs643434	A	93.91	16.4098	1	0.0001	Random	1.671	0.095	1.05	0.992	1.111	5.2727	0.0001	1	0.3173
rs663129	A	88.2	25.4207	3	0.0001	Random	1.924	0.054	1.018	1	1.038	1.9516	0.474	0	1
rs6700559	T	78.23	4.594	1	0.0321	Random	0.466	0.641	1.017	0.948	1.09	2.2812	0.0001	1	0.3173
rs6842241	A	85.19	6.7524	1	0.0094	Random	0.462	0.644	1.012	0.961	1.066	-3.3125	0.0001	-1	0.3173
rs688034	T	92.72	27.4717	2	1e-05	Random	1.761	0.078	1.06	0.993	1.132	5.6992	0.0975	1	0.1172
rs6903956	A	94.57	55.2921	3	1e-05	Random	1.38	0.168	1.064	0.974	1.163	3.319	0.2844	0	1
rs7136259	T	97.53	40.5	1	1e-05	Random	0.977	0.329	1.022	0.978	1.068	7.5	0.0001	1	0.3173
rs7250581	G	56.4	4.5869	2	0.1009	Random	1.114	0.265	1.028	0.979	1.081	1.5249	0.4211	1	0.1172
rs8055236	G	88.51	17.4132	2	0.0002	Random	1.83	0.067	1.082	0.994	1.177	3.3567	0.3406	1	0.1172
rs867186	G	79.76	4.94	1	0.0262	Random	0.382	0.702	1.024	0.907	1.157	2.3962	0.0001	1	0.3173
rs918949	T	85.15	6.7359	1	0.0094	Random	-1.239	0.215	0.949	0.873	1.031	-2.8667	0.0001	-1	0.3173
rs9369640	C	77.64	4.4716	1	0.0345	Random	-1.678	0.093	0.924	0.843	1.013	-2.4615	0.0001	-1	0.3173

## Sheet: Table S3
SNPs	EA	Chr	Start	End	Strand	Gene IDs	Gene Names
rs10139550	G	14	99679373	99679373	+	ENSG00000182218	HHIPL1
rs10168194	C	2	228122264	228122264	+	ENSG00000153820	SPHKAP
rs10237377	T	7	140057336	140057336	+	ENSG00000059378	PARP12
rs10455872	G	6	160589086	160589086	+	ENSG00000198670	LPA
rs1050362	A	16	72096916	72096916	+	ENSG00000140829	DHX38
rs10738609	G	9	22114496	22114496	+	ENSG00000240498	CDKN2B-AS1
rs10757264	G	9	22019733	22019733	+	ENSG00000240498,ENSG00000264545	CDKN2B-AS1,ENSG00000264545
rs10757270	G	9	22072720	22072720	+	ENSG00000240498	CDKN2B-AS1
rs10757272	T	9	22088261	22088261	+	ENSG00000240498	CDKN2B-AS1
rs10757274	G	9	22096056	22096056	+	ENSG00000240498	CDKN2B-AS1
rs10757275	A	9	22106226	22106226	+	ENSG00000240498	CDKN2B-AS1
rs10774610	C	12	110902439	110902439	+	ENSG00000173093	CCDC63
rs10840293	A	11	9729649	9729649	+	ENSG00000133789	SWAP70
rs10841443	G	12	20067099	20067099	+	ENSG00000256287	LINC02398
rs10849915	C	12	110895818	110895818	+	ENSG00000173093	CCDC63
rs10857147	T		-1	-1
rs1088868	G		-1	-1
rs10947262	T	6	32405535	32405535	+	ENSG00000204290,ENSG00000225914	BTNL2,TSBP1-AS1
rs10947789	T	6	39207146	39207146	+	ENSG00000164626	KCNK5
rs10965212	A	9	22023796	22023796	+	ENSG00000240498,ENSG00000264545	CDKN2B-AS1,ENSG00000264545
rs10965215	A	9	22029446	22029446	+	ENSG00000240498,ENSG00000264545	CDKN2B-AS1,ENSG00000264545
rs10965219	G	9	22053688	22053688	+	ENSG00000240498	CDKN2B-AS1
rs11042937	T		-1	-1
rs11057401	A	12	123942759	123942759	+	ENSG00000119242	CCDC92
rs11057830	A	12	124822507	124822507	+	ENSG00000073060	SCARB1
rs11065979	T		-1	-1
rs11066001	C	12	111681367	111681367	+	ENSG00000089234	BRAP
rs11099493	A	4	81665896	81665896	+	ENSG00000138670	RASGEF1B
rs111245230	C	9	110407495	110407495	+	ENSG00000165124	SVEP1
rs11170820	G	12	54120131	54120131	+	ENSG00000248265,ENSG00000250432	FLJ12825,FAM242C
rs11172113	C	12	57133500	57133500	+	ENSG00000123384	LRP1
rs11191416	T	10	102845159	102845159	+	ENSG00000213061	PFN1P11
rs11206510	T		-1	-1
rs112635299	T		-1	-1
rs112941079	A	5	9545986	9545986	+	ENSG00000112902	SEMA5A
rs11509880	A	7	12222285	12222285	+	ENSG00000106460	TMEM106B
rs115287176	A	1	151170961	151170961	+	ENSG00000163157	TMOD4
rs11556924	C	7	130023656	130023656	+	ENSG00000091732,ENSG00000244036	ZC3HC1,ENSG00000244036
rs11591147	T	1	55039974	55039974	+	ENSG00000169174	PCSK9
rs11617955	T	13	110165755	110165755	+	ENSG00000187498	COL4A1
rs116843064	A	19	8364439	8364439	+	ENSG00000167772	ANGPTL4
rs11728590	G		-1	-1
rs11752643	T		-1	-1
rs11810571	G	1	151789832	151789832	+	ENSG00000182134	TDRKH
rs11823828	G	11	5884973	5884973	+	ENSG00000132256,ENSG00000180974	TRIM5,OR52E4
rs11838776	A	13	110388334	110388334	+	ENSG00000134871	COL4A2
rs12146487	A	11	64259167	64259167	+	ENSG00000149782	PLCB3
rs1214752	T	6	43428587	43428587	+	ENSG00000124574	ABCC10
rs12190287	C	6	133893387	133893387	+	ENSG00000118526	TCF21
rs12202017	A	6	133852013	133852013	+	ENSG00000223586,ENSG00000227954	LINC01312,TARID
rs12229654	G		-1	-1
rs12231744	T	12	112039251	112039251	+	ENSG00000111300	NAA25
rs12413409	G	10	102959339	102959339	+	ENSG00000148842	CNNM2
rs12493885	C	3	154122077	154122077	+	ENSG00000114790	ARHGEF26
rs1250229	T		-1	-1
rs12524865	C	6	133875536	133875536	+	ENSG00000227954	TARID
rs12526453	C	6	12927312	12927312	+	ENSG00000112137	PHACTR1
rs12619842	C	2	164088534	164088534	+	ENSG00000237844	ENSG00000237844
rs12801636	A	11	65623846	65623846	+	ENSG00000197136	PCNX3
rs12922	A	18	35142953	35142953	+	ENSG00000166974	MAPRE2
rs12936587	G		-1	-1
rs13003675	T	2	232719399	232719399	+	ENSG00000204120	GIGYF2
rs1333042	G	9	22103814	22103814	+	ENSG00000240498	CDKN2B-AS1
rs1333048	A	9	22125348	22125348	+	ENSG00000240498	CDKN2B-AS1
rs1333049	C	9	22125504	22125504	+	ENSG00000240498	CDKN2B-AS1
rs13723	G	17	29614868	29614868	+	ENSG00000167549,ENSG00000264031	CORO6,ABHD15-AS1
rs13734	A	20	17614084	17614084	+	ENSG00000125844	RRBP1
rs1378942	A	15	74785026	74785026	+	ENSG00000103653	CSK
rs140570886	C	6	160591981	160591981	+	ENSG00000198670	LPA
rs1412444	T	10	89243170	89243170	+	ENSG00000107798	LIPA
rs1412834	T	9	22110132	22110132	+	ENSG00000240498	CDKN2B-AS1
rs142695226	G		-1	-1
rs143803699	G	2	235993608	235993608	+	ENSG00000157985	AGAP1
rs146092501	T	2	237371861	237371861	+	ENSG00000163359	COL6A3
rs146879198	A	19	2934109	2934109	+	ENSG00000175691	ZNF77
rs147555597	A	6	160490564	160490564	+	ENSG00000213071	LPAL2
rs1537372	T	9	22103184	22103184	+	ENSG00000240498	CDKN2B-AS1
rs1537373	G	9	22103342	22103342	+	ENSG00000240498	CDKN2B-AS1
rs1537376	C	9	22116221	22116221	+	ENSG00000240498	CDKN2B-AS1
rs1561198	T		-1	-1
rs167479	T	19	11416089	11416089	+	ENSG00000205517	RGL3
rs16986953	A		-1	-1
rs17087335	T	4	56972417	56972417	+	ENSG00000084092	NOA1
rs17114036	A	1	56497149	56497149	+	ENSG00000162407,ENSG00000284686	PLPP3,ENSG00000284686
rs17411031	C		-1	-1
rs17464857	T	1	222589367	222589367	+	ENSG00000143498	TAF1A
rs17465637	C	1	222650187	222650187	+	ENSG00000154305	MIA3
rs17514846	A	15	90873320	90873320	+	ENSG00000140564	FURIN
rs17517928	C	2	215426636	215426636	+	ENSG00000115414	FN1
rs17581137	A		-1	-1
rs17608766	C	17	46935905	46935905	+	ENSG00000108433,ENSG00000262633	GOSR2,ENSG00000262633
rs17678683	G	2	144528992	144528992	+	ENSG00000232606	LINC01412
rs17843797	G	3	124734175	124734175	+	ENSG00000114491	UMPS
rs1800449	T	5	122077513	122077513	+	ENSG00000113083	LOX
rs1800775	A		-1	-1
rs1801251	A	2	232768750	232768750	+	ENSG00000115474,ENSG00000204120	KCNJ13,GIGYF2
rs180803	G	22	24262890	24262890	+	ENSG00000128262,ENSG00000225098	POM121L9P,BCRP1
rs186696265	T		-1	-1
rs1867624	T		-1	-1
rs1870634	G		-1	-1
rs1878406	T		-1	-1
rs188378669	T	4	73741568	73741568	+	ENSG00000169429	CXCL8
rs1892094	T	1	169125221	169125221	+	ENSG00000143153	ATP1B1
rs192210727	T	4	61909615	61909615	+	ENSG00000150471	ADGRL3
rs1924981	T	13	28448508	28448508	+	ENSG00000102755	FLT1
rs194937	A	6	81732305	81732305	+	ENSG00000112773,ENSG00000232031	TENT5A,ENSG00000232031
rs1964272	G		-1	-1
rs199921354	T	15	91013841	91013841	+	ENSG00000184056,ENSG00000284946	VPS33B,ENSG00000284946
rs2000999	A	16	72074194	72074194	+	ENSG00000140830,ENSG00000261701	TXNL4B,HPR
rs200787930	T	15	40289298	40289298	+	ENSG00000137841	PLCB2
rs2011559	G	2	205449947	205449947	+	ENSG00000116117	PARD3B
rs2023938	C	7	18997152	18997152	+	ENSG00000048052	HDAC9
rs2048327	C	6	160442500	160442500	+	ENSG00000146477	SLC22A3
rs2072134	T	12	112971371	112971371	+	ENSG00000111331,ENSG00000257452	OAS3,ENSG00000257452
rs2074356	T	12	112207597	112207597	+	ENSG00000173064	HECTD4
rs2107595	A		-1	-1
rs2128739	A	11	103802549	103802549	+	ENSG00000254987	ENSG00000254987
rs2153219	A		-1	-1
rs216172	C	17	2223210	2223210	+	ENSG00000070366	SMG6
rs2241714	T	19	41363487	41363487	+	ENSG00000123810,ENSG00000142046,ENSG00000255730	B9D2,TMEM91,ENSG00000255730
rs2244608	G	12	120979185	120979185	+	ENSG00000135100,ENSG00000241388	HNF1A,HNF1A-AS1
rs2246833	T	10	89246097	89246097	+	ENSG00000107798	LIPA
rs2246942	G	10	89245129	89245129	+	ENSG00000107798	LIPA
rs2252641	C	2	145043894	145043894	+	ENSG00000226674	TEX41
rs2257129	C		-1	-1
rs2259816	T	12	120997784	120997784	+	ENSG00000135100	HNF1A
rs2306374	T	3	138401110	138401110	+	ENSG00000158186	MRAS
rs2315065	A		-1	-1
rs2327429	T	6	133888699	133888699	+	ENSG00000227954	TARID
rs2383206	G	9	22115027	22115027	+	ENSG00000240498	CDKN2B-AS1
rs2383207	G	9	22115960	22115960	+	ENSG00000240498	CDKN2B-AS1
rs246600	T	5	143137332	143137332	+	ENSG00000145819	ARHGAP26
rs2487928	A	10	30034963	30034963	+	ENSG00000165757	JCAD
rs2505083	C	10	30046193	30046193	+	ENSG00000165757	JCAD
rs2519093	T	9	133266456	133266456	+	ENSG00000175164	ABO
rs2523644	G	6	31374707	31374707	+	ENSG00000285647	ENSG00000285647
rs2571445	A	2	217818431	217818431	+	ENSG00000079308	TNS1
rs2596548	T		-1	-1
rs2616407	C	4	53725232	53725232	+	ENSG00000249341,ENSG00000282278	ENSG00000249341,ENSG00000282278
rs264	G	8	19955669	19955669	+	ENSG00000175445	LPL
rs2681472	G	12	89615182	89615182	+	ENSG00000070961	ATP2B1
rs2727020	C		-1	-1
rs273909	G	5	132331660	132331660	+	ENSG00000197208,ENSG00000233006	SLC22A4,MIR3936HG
rs2789422	A	1	159922298	159922298	+	ENSG00000158710	TAGLN2
rs2820315	T	1	201903136	201903136	+	ENSG00000163431	LMOD1
rs2843152	C		-1	-1
rs28451064	A	21	34221526	34221526	+	ENSG00000214955,ENSG00000272657	ENSG00000214955,ENSG00000272657
rs288187	T	5	108008725	108008725	+	ENSG00000145743	FBXL17
rs2891168	G	9	22098620	22098620	+	ENSG00000240498	CDKN2B-AS1
rs2895811	C	14	99667605	99667605	+	ENSG00000182218	HHIPL1
rs2954029	A	8	125478730	125478730	+	ENSG00000253111	ENSG00000253111
rs2972146	T		-1	-1
rs3130683	T	6	31920590	31920590	+	ENSG00000166278	C2
rs3133293	T		-1	-1
rs3184504	T	12	111446804	111446804	+	ENSG00000111252,ENSG00000204842	SH2B3,ATXN2
rs3217992	T	9	22003224	22003224	+	ENSG00000147883,ENSG00000240498,ENSG00000264545	CDKN2B,CDKN2B-AS1,ENSG00000264545
rs35146811	C	7	100123371	100123371	+	ENSG00000166997,ENSG00000242798	CNPY4,ENSG00000242798
rs35465346	A		-1	-1
rs35489971	A	17	74704804	74704804	+	ENSG00000172794,ENSG00000186074	RAB37,CD300LF
rs35895680	C		-1	-1
rs3739998	G	10	30027143	30027143	+	ENSG00000165757	JCAD
rs3782774	G	12	3262065	3262065	+	ENSG00000011105	TSPAN9
rs3782886	G	12	111672685	111672685	+	ENSG00000089234	BRAP
rs3798220	C	6	160540105	160540105	+	ENSG00000198670	LPA
rs3809346	A	13	110308596	110308596	+	ENSG00000134871	COL4A2
rs3918226	T	7	150993088	150993088	+	ENSG00000164867	NOS3
rs3993105	T	11	13281524	13281524	+	ENSG00000133794	ARNTL
rs41272114	T	6	160585045	160585045	+	ENSG00000198670	LPA
rs421329	T		-1	-1
rs425105	C	19	46705224	46705224	+	ENSG00000105287	PRKD2
rs4252120	T	6	160722576	160722576	+	ENSG00000122194	PLG
rs4252185	C	6	160702419	160702419	+	ENSG00000122194	PLG
rs4299376	T	2	43845437	43845437	+	ENSG00000143921	ABCG8
rs4380028	C	15	78818751	78818751	+	ENSG00000185787	MORF4L1
rs4420638	G		-1	-1
rs445925	G	19	44912383	44912383	+	ENSG00000280087	ENSG00000280087
rs4593108	C		-1	-1
rs4773141	G	13	110302006	110302006	+	ENSG00000187498	COL4A1
rs4773144	G	13	110308365	110308365	+	ENSG00000134871	COL4A2
rs4845625	T	1	154449591	154449591	+	ENSG00000160712	IL6R
rs4977574	G	9	22098575	22098575	+	ENSG00000240498	CDKN2B-AS1
rs501120	T		-1	-1
rs507666	A	9	133273983	133273983	+	ENSG00000175164	ABO
rs514659	C	9	133266790	133266790	+	ENSG00000175164	ABO
rs515135	C		-1	-1
rs518394	G	9	22019674	22019674	+	ENSG00000240498,ENSG00000264545	CDKN2B-AS1,ENSG00000264545
rs523096	A	9	22019130	22019130	+	ENSG00000240498,ENSG00000264545	CDKN2B-AS1,ENSG00000264545
rs55730499	T	6	160584578	160584578	+	ENSG00000198670	LPA
rs55940034	G	13	110390962	110390962	+	ENSG00000134871	COL4A2
rs56062135	C	15	67163292	67163292	+	ENSG00000166949	SMAD3
rs56131196	A		-1	-1
rs56210063	C	11	8767618	8767618	+	ENSG00000166444	DENND2B
rs56289821	G	19	11077571	11077571	+	ENSG00000127616	SMARCA4
rs56313611	T	20	48840319	48840319	+	ENSG00000278231	ENSG00000278231
rs56336142	T		-1	-1
rs56393506	T	6	160668275	160668275	+	ENSG00000243831	ENSG00000243831
rs564398	T	9	22029548	22029548	+	ENSG00000240498,ENSG00000264545	CDKN2B-AS1,ENSG00000264545
rs571353	T	11	75441198	75441198	+	ENSG00000158555	GDPD5
rs59898454	A	10	90898633	90898633	+	ENSG00000148688	RPP30
rs599839	A		-1	-1
rs602633	T		-1	-1
rs6129767	G	20	41193692	41193692	+	ENSG00000124181,ENSG00000174306	PLCG1,ZHX3
rs61734696	T	4	164197303	164197303	+	ENSG00000145416,ENSG00000248546	MARCHF1,ANP32C
rs62076439	T	17	49327266	49327266	+	ENSG00000198740	ZNF652
rs62253653	A	3	52979251	52979251	+	ENSG00000163935,ENSG00000272305	SFMBT1,ENSG00000272305
rs634552	G	11	75571007	75571007	+	ENSG00000149257	SERPINH1
rs643319	C	9	22017837	22017837	+	ENSG00000240498,ENSG00000264545	CDKN2B-AS1,ENSG00000264545
rs646776	T		-1	-1
rs6475606	T	9	22081851	22081851	+	ENSG00000240498	CDKN2B-AS1
rs6494488	A		-1	-1
rs6504218	G	17	64330939	64330939	+	ENSG00000261371	PECAM1
rs6511720	T	19	11091630	11091630	+	ENSG00000130164	LDLR
rs6538176	T		-1	-1
rs6544713	T	2	43846742	43846742	+	ENSG00000143921	ABCG8
rs657152	C	9	133263862	133263862	+	ENSG00000175164	ABO
rs6689306	A	1	154423470	154423470	+	ENSG00000160712	IL6R
rs671	A	12	111803962	111803962	+	ENSG00000111275	ALDH2
rs67180937	G	1	222650401	222650401	+	ENSG00000154305	MIA3
rs6725887	C	2	202881162	202881162	+	ENSG00000138442	WDR12
rs68170813	T	7	107619276	107619276	+	ENSG00000075790,ENSG00000288558	BCAP29,DUS4L-BCAP29
rs6841581	A		-1	-1
rs6905288	A		-1	-1
rs6909752	A	6	22612400	22612400	+	ENSG00000272168	CASC15
rs6922269	A	6	150931849	150931849	+	ENSG00000120254	MTHFD1L
rs7044859	A	9	22018782	22018782	+	ENSG00000240498,ENSG00000264545	CDKN2B-AS1,ENSG00000264545
rs7173743	T	15	78849442	78849442	+	ENSG00000185787	MORF4L1
rs7212798	C	17	60936127	60936127	+	ENSG00000141376	BCAS3
rs7214245	T	17	17688445	17688445	+	ENSG00000108557	RAI1
rs72689147	G	4	155718736	155718736	+	ENSG00000164116	GUCY1A1
rs72743461	A	15	67149412	67149412	+	ENSG00000166949	SMAD3
rs73045269	T	19	41319286	41319286	+	ENSG00000105329,ENSG00000142039	TGFB1,CCDC97
rs7412	T	19	44908822	44908822	+	ENSG00000130203	APOE
rs742115	T	6	11326788	11326788	+	ENSG00000111859	NEDD9
rs74416240	A	12	109904793	109904793	+	ENSG00000139437	TCHP
rs74617384	T	6	160576086	160576086	+	ENSG00000198670	LPA
rs748431	G	3	14886570	14886570	+	ENSG00000154783	FGD5
rs7500448	A	16	83012185	83012185	+	ENSG00000140945	CDH13
rs7528419	A	1	109274570	109274570	+	ENSG00000143126	CELSR2
rs7538207	T	1	21984181	21984181	+	ENSG00000219073,ENSG00000285959	CELA3B,ENSG00000285959
rs7568458	A	2	85561052	85561052	+	ENSG00000115486	GGCX
rs7623687	A	3	49411133	49411133	+	ENSG00000067560	RHOA
rs7678555	C		-1	-1
rs7692387	G	4	155714157	155714157	+	ENSG00000164116	GUCY1A1
rs781622	T	9	112165569	112165569	+	ENSG00000106868	SUSD1
rs7865618	A	9	22031006	22031006	+	ENSG00000240498	CDKN2B-AS1
rs7969300	C	12	111555908	111555908	+	ENSG00000204842	ATXN2
rs79716828	C		-1	-1
rs8042271	G		-1	-1
rs8108632	T	19	41348629	41348629	+	ENSG00000105329	TGFB1
rs833509	T		-1	-1
rs886126	T	12	111241410	111241410	+	ENSG00000111249	CUX2
rs916524	T	2	12140270	12140270	+	ENSG00000224184	MIR3681HG
rs925368	C	12	109953174	109953174	+	ENSG00000139436,ENSG00000139437	GIT2,TCHP
rs9319428	A	13	28399484	28399484	+	ENSG00000102755	FLT1
rs9349379	G	6	12903725	12903725	+	ENSG00000112137	PHACTR1
rs944797	C	9	22115287	22115287	+	ENSG00000240498	CDKN2B-AS1
rs9501744	T		-1	-1
rs9515203	T	13	110397276	110397276	+	ENSG00000134871	COL4A2
rs9591012	A	13	32484196	32484196	+	ENSG00000244754	N4BP2L2
rs9632884	C	9	22072302	22072302	+	ENSG00000240498	CDKN2B-AS1
rs964184	G	11	116778201	116778201	+	ENSG00000109917	ZPR1
rs974819	T	11	103789839	103789839	+	ENSG00000254987	ENSG00000254987
rs9818870	T	3	138403280	138403280	+	ENSG00000158186	MRAS
rs9970807	C	1	56499992	56499992	+	ENSG00000162407,ENSG00000284686	PLPP3,ENSG00000284686
rs9982601	T	21	34226827	34226827	+	ENSG00000214955,ENSG00000272657	ENSG00000214955,ENSG00000272657

## Sheet: Table S4
source	term_name	term_id	adjusted_p_value	negative_log10_of_adjusted_p_value	term_size	query_size	intersection_size	effective_domain_size	intersections
GO:MF	apolipoprotein binding	GO:0034185	1.41226e-06	5.85009	18	135	6	18679	RS10455872,RS11057830,RS11172113,RS11591147,RS264,RS4252120
GO:MF	lipoprotein particle binding	GO:0071813	0.000158016	3.8013	37	135	6	18679	RS11057830,RS11591147,RS264,RS6511720,RS7412,RS7500448
GO:MF	protein-lipid complex binding	GO:0071814	0.000158016	3.8013	37	135	6	18679	RS11057830,RS11591147,RS264,RS6511720,RS7412,RS7500448
GO:MF	proteoglycan binding	GO:0043394	0.00369506	2.43238	36	135	5	18679	RS11172113,RS112941079,RS17517928,RS264,RS7412
GO:MF	low-density lipoprotein particle binding	GO:0030169	0.00370089	2.43169	17	135	4	18679	RS11057830,RS11591147,RS6511720,RS7500448
GO:MF	heparan sulfate proteoglycan binding	GO:0043395	0.00370089	2.43169	17	135	4	18679	RS11172113,RS112941079,RS264,RS7412
GO:MF	phosphatidylinositol phospholipase C activity	GO:0004435	0.0221027	1.65555	26	135	4	18679	RS12146487,RS200787930,RS571353,ENSG00000124181
GO:MF	phospholipase C activity	GO:0004629	0.0258017	1.58835	27	135	4	18679	RS12146487,RS200787930,RS571353,ENSG00000124181
GO:BP	positive regulation of cell migration	GO:0030335	9.00676e-08	7.04543	568	137	23	18123	RS10840293,RS11057830,RS11172113,RS112941079,RS12922,ENSG00000162407,RS17465637,RS17517928,RS188378669,RS1924981,RS2023938,RS2487928,RS3918226,RS425105,RS4845625,RS56062135,ENSG00000124181,RS6504218,RS7212798,ENSG00000105329,RS742115,RS7500448,RS7623687
GO:BP	positive regulation of cell motility	GO:2000147	2.04854e-07	6.68856	592	137	23	18123	RS10840293,RS11057830,RS11172113,RS112941079,RS12922,ENSG00000162407,RS17465637,RS17517928,RS188378669,RS1924981,RS2023938,RS2487928,RS3918226,RS425105,RS4845625,RS56062135,ENSG00000124181,RS6504218,RS7212798,ENSG00000105329,RS742115,RS7500448,RS7623687
GO:BP	positive regulation of cellular component movement	GO:0051272	3.14421e-07	6.50249	605	137	23	18123	RS10840293,RS11057830,RS11172113,RS112941079,RS12922,ENSG00000162407,RS17465637,RS17517928,RS188378669,RS1924981,RS2023938,RS2487928,RS3918226,RS425105,RS4845625,RS56062135,ENSG00000124181,RS6504218,RS7212798,ENSG00000105329,RS742115,RS7500448,RS7623687
GO:BP	positive regulation of locomotion	GO:0040017	3.3551e-07	6.47429	607	137	23	18123	RS10840293,RS11057830,RS11172113,RS112941079,RS12922,ENSG00000162407,RS17465637,RS17517928,RS188378669,RS1924981,RS2023938,RS2487928,RS3918226,RS425105,RS4845625,RS56062135,ENSG00000124181,RS6504218,RS7212798,ENSG00000105329,RS742115,RS7500448,RS7623687
GO:BP	vasculature development	GO:0001944	6.36261e-06	5.19636	834	137	25	18123	RS111245230,RS11172113,RS112941079,RS11617955,RS116843064,RS11838776,RS12190287,RS17465637,RS17517928,RS1800449,RS188378669,RS1924981,RS2023938,RS2487928,RS3918226,RS425105,RS4845625,ENSG00000124181,RS6504218,RS6511720,RS7212798,ENSG00000105329,RS7412,RS7500448,RS7623687
GO:BP	blood vessel development	GO:0001568	1.26021e-05	4.89956	797	137	24	18123	RS11172113,RS112941079,RS11617955,RS116843064,RS11838776,RS12190287,RS17465637,RS17517928,RS1800449,RS188378669,RS1924981,RS2023938,RS2487928,RS3918226,RS425105,RS4845625,ENSG00000124181,RS6504218,RS6511720,RS7212798,ENSG00000105329,RS7412,RS7500448,RS7623687
GO:BP	blood vessel morphogenesis	GO:0048514	3.99475e-05	4.39851	715	137	22	18123	RS11172113,RS112941079,RS11617955,RS116843064,RS11838776,RS12190287,RS17465637,RS17517928,RS1800449,RS188378669,RS1924981,RS2023938,RS2487928,RS3918226,RS425105,ENSG00000124181,RS6511720,RS7212798,ENSG00000105329,RS7412,RS7500448,RS7623687
GO:BP	regulation of lipase activity	GO:0060191	0.000143492	3.84317	101	137	9	18123	RS11172113,RS116843064,RS17514846,RS1924981,RS200787930,RS2023938,RS264,ENSG00000124181,RS7623687
GO:BP	regulation of cell migration	GO:0030334	0.000262977	3.58008	1008	137	25	18123	RS10840293,RS11057830,RS11172113,RS112941079,RS12526453,RS12922,ENSG00000162407,RS17465637,RS17517928,RS188378669,RS1924981,RS2023938,RS2487928,RS3918226,RS425105,RS4845625,RS56062135,ENSG00000124181,RS6504218,RS7212798,ENSG00000105329,RS7412,RS742115,RS7500448,RS7623687
GO:BP	tube morphogenesis	GO:0035239	0.000390712	3.40814	956	137	24	18123	RS11172113,RS112941079,RS11617955,RS116843064,RS11838776,RS12190287,RS17465637,RS17517928,RS1800449,RS188378669,RS1924981,RS2023938,RS2487928,RS3918226,RS425105,RS56062135,ENSG00000124181,RS6511720,RS6922269,RS7212798,ENSG00000105329,RS7412,RS7500448,RS7623687
GO:BP	ameboidal-type cell migration	GO:0001667	0.000421672	3.37503	496	137	17	18123	RS11057830,RS112941079,RS12922,ENSG00000162407,RS17465637,RS17517928,RS2023938,RS2487928,RS2571445,RS3918226,RS425105,ENSG00000124181,RS7212798,ENSG00000105329,RS7412,RS7500448,RS7623687
GO:BP	endothelial cell migration	GO:0043542	0.0006525	3.18542	291	137	13	18123	RS11057830,RS112941079,ENSG00000162407,RS17465637,RS2023938,RS2487928,RS3918226,RS425105,ENSG00000124181,RS7212798,RS7412,RS7500448,RS7623687
GO:BP	regulation of cell motility	GO:2000145	0.00080887	3.09212	1070	137	25	18123	RS10840293,RS11057830,RS11172113,RS112941079,RS12526453,RS12922,ENSG00000162407,RS17465637,RS17517928,RS188378669,RS1924981,RS2023938,RS2487928,RS3918226,RS425105,RS4845625,RS56062135,ENSG00000124181,RS6504218,RS7212798,ENSG00000105329,RS7412,RS742115,RS7500448,RS7623687
GO:BP	regulation of hydrolase activity	GO:0051336	0.00125059	2.90288	1252	137	27	18123	RS10455872,RS11172113,RS11509880,RS116843064,RS12493885,RS12526453,RS12922,RS143803699,RS146092501,RS167479,RS17514846,RS17517928,RS1924981,RS200787930,RS2023938,ENSG00000111331,RS246600,RS264,RS425105,RS56062135,ENSG00000124181,RS634552,RS7212798,RS742115,RS748431,RS7623687,RS925368
GO:BP	regulation of locomotion	GO:0040012	0.00167446	2.77613	1113	137	25	18123	RS10840293,RS11057830,RS11172113,RS112941079,RS12526453,RS12922,ENSG00000162407,RS17465637,RS17517928,RS188378669,RS1924981,RS2023938,RS2487928,RS3918226,RS425105,RS4845625,RS56062135,ENSG00000124181,RS6504218,RS7212798,ENSG00000105329,RS7412,RS742115,RS7500448,RS7623687
GO:BP	epithelial cell migration	GO:0010631	0.00172604	2.76295	371	137	14	18123	RS11057830,RS112941079,RS12922,ENSG00000162407,RS17465637,RS2023938,RS2487928,RS3918226,RS425105,ENSG00000124181,RS7212798,RS7412,RS7500448,RS7623687
GO:BP	epithelium migration	GO:0090132	0.00189913	2.72145	374	137	14	18123	RS11057830,RS112941079,RS12922,ENSG00000162407,RS17465637,RS2023938,RS2487928,RS3918226,RS425105,ENSG00000124181,RS7212798,RS7412,RS7500448,RS7623687
GO:BP	positive regulation of endothelial cell migration	GO:0010595	0.00208055	2.68182	138	137	9	18123	RS11057830,RS112941079,ENSG00000162407,RS2023938,RS2487928,RS3918226,RS425105,ENSG00000124181,RS7212798
GO:BP	tissue migration	GO:0090130	0.00229271	2.63965	380	137	14	18123	RS11057830,RS112941079,RS12922,ENSG00000162407,RS17465637,RS2023938,RS2487928,RS3918226,RS425105,ENSG00000124181,RS7212798,RS7412,RS7500448,RS7623687
GO:BP	positive regulation of epithelial cell migration	GO:0010634	0.00236279	2.62658	181	137	10	18123	RS11057830,RS112941079,RS12922,ENSG00000162407,RS2023938,RS2487928,RS3918226,RS425105,ENSG00000124181,RS7212798
GO:BP	circulatory system development	GO:0072359	0.00242606	2.6151	1215	137	26	18123	RS111245230,RS11172113,RS112941079,RS11617955,RS116843064,RS11838776,RS12190287,RS17465637,RS17517928,RS1800449,RS188378669,RS1924981,RS2023938,RS2487928,RS3918226,RS425105,RS4845625,RS56062135,ENSG00000124181,RS6504218,RS6511720,RS7212798,ENSG00000105329,RS7412,RS7500448,RS7623687
GO:BP	regulation of cellular component movement	GO:0051270	0.0029887	2.52452	1149	137	25	18123	RS10840293,RS11057830,RS11172113,RS112941079,RS12526453,RS12922,ENSG00000162407,RS17465637,RS17517928,RS188378669,RS1924981,RS2023938,RS2487928,RS3918226,RS425105,RS4845625,RS56062135,ENSG00000124181,RS6504218,RS7212798,ENSG00000105329,RS7412,RS742115,RS7500448,RS7623687
GO:BP	regulation of plasma lipoprotein particle levels	GO:0097006	0.00323929	2.48955	108	137	8	18123	RS10455872,RS11057830,RS11591147,RS1378942,RS1412444,RS264,RS6511720,RS7412
GO:BP	tube development	GO:0035295	0.00344061	2.46337	1158	137	25	18123	RS11172113,RS112941079,RS11617955,RS116843064,RS11838776,RS12190287,RS1412444,RS17465637,RS17517928,RS1800449,RS188378669,RS1924981,RS2023938,RS2487928,RS3918226,RS425105,RS56062135,ENSG00000124181,RS6511720,RS6922269,RS7212798,ENSG00000105329,RS7412,RS7500448,RS7623687
GO:BP	cell migration	GO:0016477	0.00352229	2.45317	1660	137	31	18123	RS10840293,RS11057830,RS11172113,RS112941079,RS12526453,RS12922,ENSG00000167549,ENSG00000162407,RS17465637,RS17517928,RS1800449,RS188378669,RS1892094,RS192210727,RS1924981,RS2023938,RS2487928,RS2571445,RS3918226,RS425105,RS4845625,RS56062135,ENSG00000124181,RS6504218,RS7212798,ENSG00000105329,RS7412,RS742115,RS7500448,RS7528419,RS7623687
GO:BP	regulation of endothelial cell migration	GO:0010594	0.00501222	2.29997	244	137	11	18123	RS11057830,RS112941079,ENSG00000162407,RS2023938,RS2487928,RS3918226,RS425105,ENSG00000124181,RS7212798,RS7412,RS7623687
GO:BP	cholesterol transport	GO:0030301	0.00520697	2.28341	115	137	8	18123	RS11057830,RS11172113,RS11591147,RS17514846,ENSG00000135100,RS4299376,RS6511720,RS7412
GO:BP	regulation of epithelial cell migration	GO:0010632	0.00733572	2.13456	306	137	12	18123	RS11057830,RS112941079,RS12922,ENSG00000162407,RS2023938,RS2487928,RS3918226,RS425105,ENSG00000124181,RS7212798,RS7412,RS7623687
GO:BP	regulation of cell adhesion	GO:0030155	0.00836685	2.07744	756	137	19	18123	RS10840293,ENSG00000204290,RS11172113,RS112941079,RS1378942,ENSG00000162407,RS17465637,RS17517928,RS188378669,ENSG00000111252,RS425105,RS4252120,RS56062135,RS7212798,ENSG00000105329,RS742115,RS7500448,RS7528419,RS7623687
GO:BP	angiogenesis	GO:0001525	0.00917564	2.03736	621	137	17	18123	RS112941079,RS11617955,RS116843064,RS11838776,RS12190287,RS17465637,RS17517928,RS188378669,RS1924981,RS2023938,RS2487928,RS3918226,RS425105,ENSG00000124181,RS7212798,RS7500448,RS7623687
GO:BP	lipid homeostasis	GO:0055088	0.0111222	1.95381	169	137	9	18123	RS11057830,RS11591147,RS116843064,RS2023938,RS264,RS4299376,RS6511720,ENSG00000105329,RS7412
GO:BP	regulation of localization	GO:0032879	0.0111936	1.95103	2906	137	43	18123	RS10840293,RS10947789,RS11057830,RS11172113,RS112941079,RS11591147,ENSG00000132256,RS12526453,RS12922,RS1378942,ENSG00000162407,RS17465637,RS17514846,RS17517928,RS1801251,RS188378669,RS1892094,RS1924981,RS2023938,ENSG00000135100,RS2487928,RS264,RS2681472,RS3130683,ENSG00000204842,ENSG00000166997,ENSG00000186074,RS3918226,RS3993105,RS425105,RS4299376,RS4845625,RS56062135,ENSG00000124181,RS6504218,…
GO:BP	sterol transport	GO:0015918	0.0115926	1.93582	128	137	8	18123	RS11057830,RS11172113,RS11591147,RS17514846,ENSG00000135100,RS4299376,RS6511720,RS7412
GO:BP	response to lipoprotein particle	GO:0055094	0.0124127	1.90613	35	137	5	18123	RS17465637,RS264,RS6511720,RS7412,RS7500448
GO:BP	cellular response to lipoprotein particle stimulus	GO:0071402	0.0164661	1.78341	37	137	5	18123	RS17465637,RS264,RS6511720,RS7412,RS7500448
GO:BP	regulation of low-density lipoprotein particle receptor catabolic process	GO:0032803	0.0166261	1.77921	6	137	3	18123	RS11591147,RS17514846,RS7412
GO:BP	regulation of catalytic activity	GO:0050790	0.0168532	1.77332	2452	137	38	18123	RS10455872,RS11057830,RS11099493,RS11172113,RS11509880,RS116843064,RS12493885,RS12526453,RS12922,RS1378942,RS143803699,RS146092501,RS167479,RS17514846,RS17517928,RS1924981,RS200787930,RS2023938,ENSG00000111331,RS216172,RS246600,RS264,ENSG00000111252,RS3217992,RS3918226,RS425105,RS4845625,RS56062135,RS56210063,ENSG00000124181,RS634552,RS7212798,ENSG00000105329,RS7412,RS742115,RS748431,RS7623687,RS…
GO:BP	cholesterol homeostasis	GO:0042632	0.020188	1.69491	99	137	7	18123	RS11057830,RS11591147,RS2023938,RS264,RS4299376,RS6511720,RS7412
GO:BP	sterol homeostasis	GO:0055092	0.0215719	1.66611	100	137	7	18123	RS11057830,RS11591147,RS2023938,RS264,RS4299376,RS6511720,RS7412
GO:BP	anatomical structure formation involved in morphogenesis	GO:0048646	0.0237771	1.62384	1209	137	24	18123	RS112941079,RS115287176,RS11617955,RS116843064,RS11838776,RS12190287,RS17465637,RS17514846,RS17517928,RS188378669,RS1924981,RS2023938,ENSG00000135100,RS2487928,RS2820315,RS3918226,RS425105,RS56062135,ENSG00000124181,RS6922269,RS7212798,ENSG00000105329,RS7500448,RS7623687
GO:BP	triglyceride homeostasis	GO:0070328	0.0244083	1.61246	40	137	5	18123	RS11057830,RS116843064,RS264,RS4299376,RS7412
GO:BP	acylglycerol homeostasis	GO:0055090	0.0244083	1.61246	40	137	5	18123	RS11057830,RS116843064,RS264,RS4299376,RS7412
GO:BP	blood vessel endothelial cell migration	GO:0043534	0.0251936	1.59871	187	137	9	18123	RS11057830,RS17465637,RS2023938,RS2487928,RS3918226,RS425105,ENSG00000124181,RS7412,RS7623687
GO:BP	cell motility	GO:0048870	0.0290184	1.53733	1840	137	31	18123	RS10840293,RS11057830,RS11172113,RS112941079,RS12526453,RS12922,ENSG00000167549,ENSG00000162407,RS17465637,RS17517928,RS1800449,RS188378669,RS1892094,RS192210727,RS1924981,RS2023938,RS2487928,RS2571445,RS3918226,RS425105,RS4845625,RS56062135,ENSG00000124181,RS6504218,RS7212798,ENSG00000105329,RS7412,RS742115,RS7500448,RS7528419,RS7623687
GO:BP	localization of cell	GO:0051674	0.0290184	1.53733	1840	137	31	18123	RS10840293,RS11057830,RS11172113,RS112941079,RS12526453,RS12922,ENSG00000167549,ENSG00000162407,RS17465637,RS17517928,RS1800449,RS188378669,RS1892094,RS192210727,RS1924981,RS2023938,RS2487928,RS2571445,RS3918226,RS425105,RS4845625,RS56062135,ENSG00000124181,RS6504218,RS7212798,ENSG00000105329,RS7412,RS742115,RS7500448,RS7528419,RS7623687
GO:BP	cell surface receptor signaling pathway	GO:0007166	0.0295384	1.52961	3226	137	45	18123	ENSG00000204290,RS11057830,RS111245230,RS11172113,RS112941079,ENSG00000091732,RS11617955,ENSG00000132256,RS11838776,RS12146487,RS13003675,RS1378942,ENSG00000162407,ENSG00000284686,RS17514846,RS17517928,RS1800449,RS188378669,RS192210727,RS1924981,RS200787930,ENSG00000111331,ENSG00000135100,RS2487928,ENSG00000282278,RS288187,ENSG00000111252,RS3217992,ENSG00000186074,RS3918226,RS3993105,RS425105,RS4…
GO:BP	plasma lipoprotein particle clearance	GO:0034381	0.0319972	1.49489	71	137	6	18123	RS11057830,RS11591147,RS1378942,RS1412444,RS6511720,RS7412
GO:BP	cell-substrate junction organization	GO:0150115	0.0336327	1.47324	107	137	7	18123	RS11172113,RS12922,RS17517928,RS2571445,RS56062135,RS7212798,RS7623687
GO:BP	biological adhesion	GO:0022610	0.0408704	1.38859	1509	137	27	18123	RS10840293,ENSG00000204290,RS11057830,RS111245230,RS11172113,RS112941079,RS1378942,RS146092501,ENSG00000162407,RS17465637,RS17517928,RS188378669,RS1892094,RS192210727,RS2011559,RS2487928,ENSG00000111252,RS425105,RS4252120,RS56062135,RS6504218,RS7212798,ENSG00000105329,RS742115,RS7500448,RS7528419,RS7623687
GO:BP	negative regulation of multicellular organismal process	GO:0051241	0.0457815	1.33931	1174	137	23	18123	RS112941079,RS11591147,RS11838776,RS1378942,RS17514846,RS17517928,RS2023938,ENSG00000111331,RS2681472,ENSG00000111252,RS3918226,RS3993105,RS4252120,RS4299376,RS4845625,RS56062135,ENSG00000163935,RS6511720,RS7214245,RS72689147,ENSG00000105329,RS7412,RS7623687
GO:BP	low-density lipoprotein particle clearance	GO:0034383	0.0490317	1.30952	46	137	5	18123	RS11057830,RS11591147,RS1378942,RS1412444,RS6511720
GO:CC	lipoprotein particle	GO:1990777	0.00238955	2.62168	38	136	5	18964	RS10455872,ENSG00000261701,RS264,RS6511720,RS7412
GO:CC	plasma lipoprotein particle	GO:0034358	0.00238955	2.62168	38	136	5	18964	RS10455872,ENSG00000261701,RS264,RS6511720,RS7412
GO:CC	anchoring junction	GO:0070161	0.00280609	2.5519	838	136	19	18964	RS11172113,RS12922,RS1378942,ENSG00000162407,RS1892094,RS192210727,RS1924981,RS2011559,RS246600,RS2487928,RS2571445,RS3782774,ENSG00000124181,RS6504218,RS742115,RS74416240,RS7500448,RS7623687,RS925368
GO:CC	protein-lipid complex	GO:0032994	0.00350658	2.45512	41	136	5	18964	RS10455872,ENSG00000261701,RS264,RS6511720,RS7412
GO:CC	PCSK9-LDLR complex	GO:1990666	0.0166845	1.77769	2	136	2	18964	RS11591147,RS6511720
KEGG	Cholesterol metabolism	KEGG:04979	5.04689e-10	9.29698	50	67	10	8000	RS10455872,RS11057830,RS11172113,RS11591147,RS116843064,RS1412444,RS264,RS4299376,RS6511720,RS7412
KEGG	AGE-RAGE signaling pathway in diabetic complications	KEGG:04933	6.13539e-07	6.21216	100	67	10	8000	RS11617955,RS11838776,RS12146487,RS17517928,RS188378669,RS200787930,RS3918226,RS56062135,ENSG00000124181,ENSG00000105329
KEGG	Aldosterone synthesis and secretion	KEGG:04925	0.00120382	2.91944	98	67	7	8000	RS11057830,RS12146487,RS1892094,RS200787930,RS2681472,RS425105,RS6511720
KEGG	Amoebiasis	KEGG:05146	0.00146735	2.83347	101	67	7	8000	RS11617955,RS11838776,RS12146487,RS17517928,RS188378669,RS200787930,ENSG00000105329
KEGG	Protein digestion and absorption	KEGG:04974	0.00166822	2.77775	103	67	7	8000	RS10947789,RS11617955,RS11838776,RS146092501,RS1801251,RS1892094,ENSG00000219073
KEGG	Pancreatic secretion	KEGG:04972	0.0149135	1.82642	102	67	6	8000	RS12146487,RS1892094,RS200787930,RS2681472,ENSG00000219073,RS7623687
KEGG	Phospholipase D signaling pathway	KEGG:04072	0.0160411	1.79476	147	67	7	8000	RS12146487,ENSG00000162407,RS188378669,RS200787930,RS2306374,ENSG00000124181,RS7623687
KEGG	cGMP-PKG signaling pathway	KEGG:04022	0.0337095	1.47225	166	67	7	8000	RS12146487,RS1892094,RS200787930,RS2681472,RS3918226,RS72689147,RS7623687
REAC	Plasma lipoprotein assembly, remodeling, and clearance	REAC:R-HSA-174824	1.23167e-05	4.90951	67	80	8	10622	RS10455872,RS11591147,RS116843064,RS1412444,RS17514846,RS264,RS6511720,RS7412
REAC	Plasma lipoprotein remodeling	REAC:R-HSA-8963899	0.000979846	3.00884	30	80	5	10622	RS10455872,RS116843064,RS17514846,RS264,RS7412
REAC	Signaling by PDGF	REAC:R-HSA-186797	0.0010907	2.9623	54	80	6	10622	RS11617955,RS11838776,RS146092501,RS17514846,RS4252120,ENSG00000124181
REAC	Signaling by Receptor Tyrosine Kinases	REAC:R-HSA-9006934	0.0231893	1.63471	486	80	13	10622	RS11617955,RS11838776,RS1378942,RS146092501,RS17514846,RS17517928,RS1924981,ENSG00000111252,RS3918226,RS4252120,ENSG00000124181,RS7412,RS7623687
REAC	Plasma lipoprotein clearance	REAC:R-HSA-8964043	0.0340983	1.46727	32	80	4	10622	RS11591147,RS1412444,RS6511720,RS7412
WP	Metabolic pathway of LDL, HDL and TG, including diseases	WP:WP4522	4.40614e-05	4.35594	17	71	5	7562	RS11057830,RS11591147,RS264,RS6511720,RS7412
WP	Statin Pathway	WP:WP430	6.15724e-05	4.21061	33	71	6	7562	RS11057830,RS11172113,RS264,RS4299376,RS6511720,RS7412
WP	Hepatitis C and Hepatocellular Carcinoma	WP:WP3646	0.000779117	3.1084	50	71	6	7562	RS11838776,RS188378669,ENSG00000135100,RS4845625,RS56062135,ENSG00000105329
WP	Composition of Lipid Particles	WP:WP3601	0.0111549	1.95253	10	71	3	7562	RS264,RS6511720,RS7412
WP	VEGFA-VEGFR2 Signaling Pathway	WP:WP3888	0.0220026	1.65753	437	71	13	7562	RS12146487,RS13003675,RS1378942,RS17517928,RS188378669,RS1924981,RS2023938,ENSG00000172794,RS3918226,RS425105,ENSG00000124181,RS748431,RS7623687
WP	Resistin as a regulator of inflammation	WP:WP4481	0.0292032	1.53457	33	71	4	7562	RS12146487,RS188378669,RS200787930,ENSG00000124181
WP	Proprotein convertase subtilisin/kexin type 9 (PCSK9) mediated LDL receptor degradation	WP:WP2846	0.031841	1.49701	3	71	2	7562	RS11591147,RS6511720
WP	Evolocumab Mechanism	WP:WP3408	0.031841	1.49701	3	71	2	7562	RS11591147,RS6511720
WP	Pathways Regulating Hippo Signaling	WP:WP4540	0.0382755	1.41708	99	71	6	7562	RS12146487,RS1924981,RS200787930,RS56062135,RS7500448,RS7623687
WP	GPR40 Pathway	WP:WP3958	0.0499909	1.30111	16	71	3	7562	RS12146487,RS200787930,ENSG00000124181
MIRNA	hsa-miR-29b-3p	MIRNA:hsa-miR-29b-3p	0.0356541	1.44789	260	122	10	14823	RS11617955,RS116843064,RS11838776,RS143803699,RS146092501,RS1800449,RS4380028,RS634552,ENSG00000105329,RS742115
HP	Abnormal cerebral artery morphology	HP:0009145	0.00040231	3.39544	61	52	8	4511	RS11591147,RS11617955,RS1800449,RS4299376,RS56062135,RS6511720,RS72689147,RS7568458
HP	Peripheral arterial stenosis	HP:0004950	0.00102344	2.98994	30	52	6	4511	RS11591147,RS1800449,RS4299376,RS56062135,RS6511720,RS7412
HP	Aortic atherosclerotic lesion	HP:0012397	0.00231318	2.63579	9	52	4	4511	RS11591147,RS4299376,RS6511720,RS7412
HP	Arteriosclerosis	HP:0002634	0.0024984	2.60234	77	52	8	4511	RS11591147,RS1412444,RS1800449,RS4299376,RS56062135,RS6511720,RS7412,RS7568458
HP	Hypercholesterolemia	HP:0003124	0.00327624	2.48462	56	52	7	4511	RS11591147,RS1412444,RS264,RS4299376,RS6511720,RS7214245,RS7412
HP	Renal steatosis	HP:0000799	0.00595563	2.22507	11	52	4	4511	RS11591147,RS4299376,RS6511720,RS7412
HP	Coronary artery atherosclerosis	HP:0001677	0.010758	1.96827	44	52	6	4511	RS11591147,RS1800449,RS4299376,RS56062135,RS6511720,RS7412
HP	Tendon xanthomatosis	HP:0010874	0.0126852	1.8967	13	52	4	4511	RS11591147,RS4299376,RS6511720,RS7412
HP	Atherosclerosis	HP:0002621	0.013593	1.86669	69	52	7	4511	RS11591147,RS1800449,RS4299376,RS56062135,RS6511720,RS7412,RS7568458
HP	Xanthomatosis	HP:0000991	0.0135971	1.86655	27	52	5	4511	RS11591147,RS264,RS4299376,RS6511720,RS7412
HP	Increased LDL cholesterol concentration	HP:0003141	0.0164093	1.78491	28	52	5	4511	RS11591147,RS264,RS4299376,RS6511720,RS7412
HP	Nodular changes affecting the eyelids	HP:0010732	0.0176082	1.75428	14	52	4	4511	RS11591147,RS264,RS6511720,RS7412
HP	Premature coronary artery atherosclerosis	HP:0005181	0.0176082	1.75428	14	52	4	4511	RS11591147,RS4299376,RS6511720,RS7412
HP	Xanthelasma	HP:0001114	0.0176082	1.75428	14	52	4	4511	RS11591147,RS264,RS6511720,RS7412
HP	Abnormal coronary artery morphology	HP:0006704	0.0323257	1.49045	53	52	6	4511	RS11591147,RS1800449,RS4299376,RS56062135,RS6511720,RS7412
HP	Cerebral artery atherosclerosis	HP:0007201	0.0344009	1.46343	6	52	3	4511	RS11591147,RS4299376,RS6511720
HP	Myocardial steatosis	HP:0006693	0.0344009	1.46343	6	52	3	4511	RS11591147,RS4299376,RS6511720
HP	Hyperlipoproteinemia	HP:0010980	0.0440921	1.35564	34	52	5	4511	RS11591147,RS264,RS4299376,RS6511720,RS7412
HP	Abnormal cerebral vascular morphology	HP:0100659	0.0447462	1.34924	268	52	12	4511	RS11591147,RS11617955,RS11838776,RS17517928,RS1800449,ENSG00000111252,RS3918226,RS4299376,RS56062135,RS6511720,RS72689147,RS7568458
